# Supplementary material for: Enantioselective formal [3+2]-cycloadditions to access spirooxindoles bearing four contiguous stereocenters through synergistic catalysis
Source: Royal Society of Chemistry journal article supplement (doi:10.1039/d0cc07957j), 2021-01-01
Supplement: d0cc07957j1.pdf [file d0cc07957j1.pdf]

## Enantioselective Formal [3+2]-Cycloadditions to Access Spirooxindoles Bearing Four Contiguous Stereocenters through Synergistic Catalysis

Jun-An Xiao,<sup>a\*</sup> Jin-Lian Li,<sup>a</sup> Xiu-Liang Cheng,<sup>a</sup> Kai Chen,<sup>b, c</sup> Hai Peng,<sup>a</sup>  
Wen-Qiang Chen,<sup>a</sup> Wei Su,<sup>a</sup> Yan-Min Huang,<sup>a\*</sup> Hua Yang<sup>b\*</sup>

<sup>a</sup> Guangxi Key Laboratory of Natural Polymer Chemistry and Physics, Nanning Normal University,  
Nanning, Guangxi 530001, P. R. China.

<sup>b</sup> College of Chemistry and Chemical Engineering, Central South University, Changsha, Hunan 410083, P.  
R. China.

<sup>c</sup> State Key Laboratory of Chemical Oncogenomics, Peking University Shenzhen Graduate School,  
Shenzhen 518055, P. R. China

**E-mail:** hyangchem@csu.edu.cn; jaxiao@csu.edu.cn; kaichen@csu.edu.cn;  
huangyanmin828@163.com

## Supporting Information

### Contents

---

|                                                      |      |
|------------------------------------------------------|------|
| 1. General Information                               | S2   |
| 2. Experimental Procedures and Characterization Data | S2   |
| 3. References                                        | S46  |
| 4. NMR and HPLC Spectra                              | S47  |
| 5. X-Ray Crystal Structures                          | S167 |

## 1. General Information

Unless otherwise noted, all the reagents were purchased from commercial suppliers and used without further purification. All solvents and commercially available reagents were either purified via literature procedures or used without further purification.  $^1\text{H}$  NMR spectra were recorded on a Bruker Avance III 400 MHz.  $^{13}\text{C}$  NMR data were collected at 100 MHz with complete proton decoupling. The chemical shifts were recorded in ppm relative to tetramethylsilane and with the solvent resonance as the internal standard. Data were reported as follows: chemical shift, multiplicity (s = singlet, d = doublet, t = triplet, q = quartet, m = multiplet), coupling constants (Hz), integration. Chemical shifts were reported in ppm from the tetramethylsilane with the solvent resonance as internal standard. High resolution mass spectroscopy (HRMS) was recorded on TOF MS ESI<sup>+</sup> mass spectrometer and acetonitrile was used to dissolve the sample. Melting points were determined with a WRX-4 melting apparatus. High-performance liquid chromatography (HPLC) was performed on a Shimadzu LC 20 system equipped with a variable wavelength detector using Chiralcel OD-H, AD-H, AS-H and IA column from Daicel. Optical rotations were measured on a WZZ-3 digital polarimeter with a sodium lamp and reported as follows;  $[\alpha]_{\text{D}}^{25}$  ( $c = \text{g}/100 \text{ mL}$ , solvent). Flash Column chromatography was carried out on silica gel (200-300 mesh). Thin layer chromatography was carried out on TLC plates coated with silica gel 60 F<sub>254</sub> with fluorescence indicator. For the detection of the signals ultraviolet light ( $\lambda = 254 \text{ nm}$ ) was used. The spirovinylcyclopropyl oxindoles **1** were prepared according to the procedures reported previously.<sup>1</sup>

## 2. Experimental Procedures and Characterization Data

### 2.1 Optimization of reaction conditions

We also turned our attention to screening various additives to improve the yield of this reaction (Table S1, entries 1-10). Gratifyingly, acetic acid (AcOH) was selected as the best additive and gave the adduct in 89% yield with excellent ee value (Table S1, entry 3). Subsequently, a variety of palladium salts, including Pd(OTFA)<sub>2</sub> and Pd<sub>2</sub>dba<sub>3</sub> were also screened, but led to inferior results (Table S1, entries 4-5). While using PPh<sub>3</sub>/Pd(OAc)<sub>2</sub> as catalyst and AcOH as additive, other solvents such as MeCN (acetonitrile), THF (tetrahydrofuran), toluene, methanol and DMF (*N,N*-dimethylformamide) were next examined. To our delight, THF gave slightly better results in terms of diastereoselectivities and enantioselectivities in comparison with other solvents (Table S1, entry 7 *versus* entry 6 & entries 8-10).

**Table S1 Additive, catalyst and solvent screening of formal [3+2]-cycloadditions<sup>a</sup>**

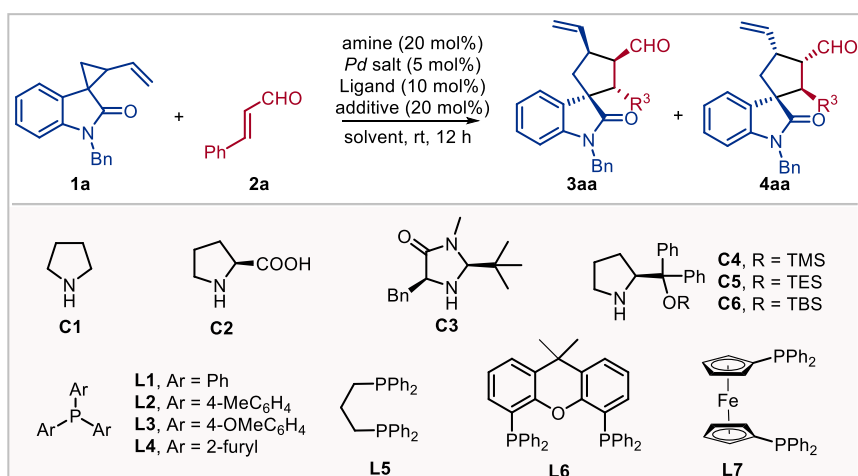

| entry          | amine     | L         | additive      | solvent                         | yield (%) <sup>b</sup> | dr <sup>c</sup> | ee <sup>d</sup> |
|----------------|-----------|-----------|---------------|---------------------------------|------------------------|-----------------|-----------------|
| 1 <sup>e</sup> | C4        | L1        | OFBA          | CH <sub>2</sub> Cl <sub>2</sub> | 58                     | 64:37           | 92/89           |
| 2 <sup>e</sup> | C4        | L1        | <i>p</i> -TSA | CH <sub>2</sub> Cl <sub>2</sub> | 66                     | 67:33           | 89/82           |
| 3              | C4        | L1        | AcOH          | CH <sub>2</sub> Cl <sub>2</sub> | 89                     | 56:44           | 88/86           |
| 4 <sup>f</sup> | C4        | L1        | AcOH          | CH <sub>2</sub> Cl <sub>2</sub> | trace                  | -               | -               |
| 5 <sup>g</sup> | C4        | L1        | AcOH          | CH <sub>2</sub> Cl <sub>2</sub> | 83                     | 62:38           | 82/75           |
| 6              | C4        | L1        | AcOH          | MeCN                            | 81                     | 54:46           | 92/52           |
| <b>7</b>       | <b>C4</b> | <b>L1</b> | <b>AcOH</b>   | <b>THF</b>                      | <b>84</b>              | <b>62:38</b>    | <b>98/96</b>    |
| 8              | C4        | L1        | AcOH          | Toluene                         | 71                     | 52:48           | 90/92           |
| 9              | C4        | L1        | AcOH          | MeOH                            | 90                     | 51:49           | 90/-36          |
| 10             | C4        | L1        | AcOH          | DMF                             | 86                     | 60:40           | 96/8            |

<sup>a</sup>Reaction conditions: **1a** (0.2 mmol), **2a** (0.24 mmol), Pd(OAc)<sub>2</sub> (5 mol%), ligand (10 mol%), amine (20 mol%), additive (20 mol%), and dichloromethane (2 mL) at room temperature.

<sup>b</sup>Isolated yield. <sup>c</sup>Determined by isolated yields of **3aa** and **4aa**. <sup>d</sup>Determined by chiral HPLC.

<sup>e</sup>Reaction time was 24 h. <sup>f</sup>Pd(OTFA)<sub>2</sub> was used instead of Pd(OAc)<sub>2</sub>. <sup>g</sup>Pd<sub>2</sub>(dba)<sub>3</sub> was used instead of Pd(OAc)<sub>2</sub>. OFBA = *o*-fluorobenzoic acid; *p*-TSA = *p*-toluenesulfonic acid

## 2.2 General procedure for the synthesis of racemic spirooxindole **3** and **4**

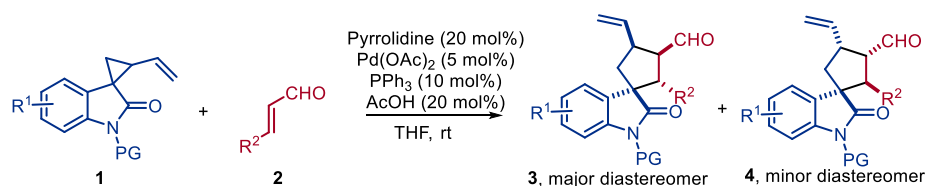

To a solution of spirovinylnorindole **1** (0.2 mmol), and enal **2** (0.24 mmol, 1.2 equiv.) in THF (2 mL) were added Pd(OAc)<sub>2</sub> (2.2 mg, 5 mol%), PPh<sub>3</sub> (5.2 mg, 10 mol%), AcOH (2.4 mg, 20 mol%) and pyrrolidine (2.8 mg, 20 mol%), respectively. The mixture was stirred for about 12 h (TLC monitoring) at room temperature. The mixture was then concentrated in *vacuo* and purified by flash column chromatography on silica gel (Petroleum ether/EtOAc= 19:1 to 9:1) to give racemic **3** and **4**, respectively.

## 2.3 General procedure for the synthesis of enantioenriched spirooxindole **3** and **4**

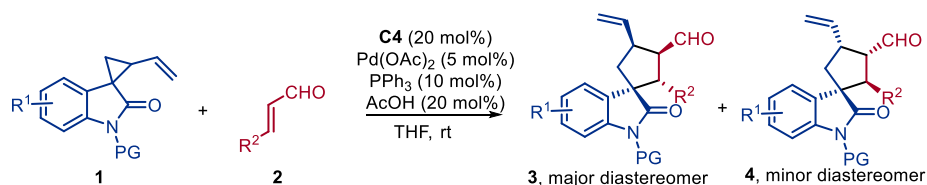

To a solution of spirovinylnorindole **1** (0.2 mmol), and enal **2** (0.24 mmol, 1.2 equiv.) in THF (2 mL) were added Pd(OAc)<sub>2</sub> (2.2 mg, 5 mol%), PPh<sub>3</sub> (5.2 mg, 10 mol%), AcOH (2.4 mg, 20 mol%) and Jørgensen-Hayashi catalyst **C4** (2.8 mg, 20 mol%), respectively. The mixture was stirred for about 12 h (TLC monitoring) at room temperature. The mixture was then concentrated in *vacuo* and purified by flash column chromatography on silica gel (Petroleum ether/EtOAc= 19:1 to 9:1) to give enantioenriched **3** and **4**, respectively.

(1*S*,2*R*,3*R*,4*S*)-1'-benzyl-2'-oxo-2-phenyl-4-vinylspiro[cyclopentane-1,3'-indoline]-3-carbaldehyde (**3aa**): white solid (32% yield, 26.0 mg, 0.064 mmol, 98% ee); m.p. 131-133 °C;  $[\alpha]_D^{25} -147.6$  (c 1, CHCl<sub>3</sub>); <sup>1</sup>H NMR (DMSO-*d*<sub>6</sub>, 400 MHz)  $\delta$  9.74 (d, *J* = 2.4 Hz, 1H), 7.74-7.72 (m, 1H), 7.24-7.19 (m, 2H), 7.15-7.10 (m, 6H), 6.93 (d, *J* = 7.2 Hz, 2H), 6.54 (d, *J* = 7.2 Hz, 2H), 6.50-6.48 (m, 1H), 6.16-6.07 (m, 1H), 5.29 (d, *J* = 16.8 Hz, 1H), 5.15 (d, *J* = 10.0 Hz, 1H), 4.88 (d, *J* = 16.8 Hz, 1H), 4.43 (d, *J* =



16.0 Hz, 1H), 4.35-4.29 (m, 1H), 4.22 (d,  $J = 11.2$  Hz, 1H), 3.96-3.87 (m, 1H), 2.41 (dd,  $J = 13.2$ , 7.6 Hz, 1H), 2.24 (dd,  $J = 13.2$ , 8.2 Hz, 1H);  $^{13}\text{C}$  NMR (DMSO- $d_6$ , 100 MHz)  $\delta$  204.1, 178.3, 142.8, 139.3, 136.8, 136.1, 131.0, 128.8, 128.5, 128.2, 127.6, 127.3, 126.8, 123.4, 123.0, 117.0, 109.2, 59.4, 56.8, 53.1, 43.0, 42.8, 42.6; HRMS (TOF-ESI $^+$ )  $m/z$ : calcd for  $\text{C}_{28}\text{H}_{25}\text{NO}_2\text{Na}$   $[\text{M}+\text{Na}]^+$  430.1778, found 430.1776; HPLC analysis: Daicel Chiralpak OD-H (*i*-PrOH: *n*-Hexane = 95:5; flow rate: 1 mL/min;  $\lambda = 254$  nm;  $t_{\text{minor}} = 22.2$  min,  $t_{\text{major}} = 27.1$  min.

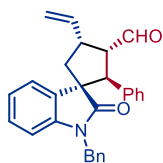

(1*S*,2*S*,3*S*,4*R*)-1'-benzyl-2'-oxo-2-phenyl-4-vinylspiro[cyclopentane-1,3'-indoline]-3-carbaldehyde (**4aa**): white solid (52% yield, 42.3 mg, 0.0104 mmol, 96% ee); m.p. 68-70 °C;  $[\alpha]_{\text{D}}^{25} -40.0$  ° (c 1,  $\text{CHCl}_3$ );  $^1\text{H}$  NMR (400 MHz, DMSO- $d_6$ )  $\delta$  9.73 (d,  $J = 2.0$  Hz, 1H), 7.64 (d,  $J = 6.0$  Hz, 1H), 7.19-7.16 (m, 3H), 7.05 (t,  $J = 6.8$  Hz, 2H), 7.00 (t,  $J = 6.0$  Hz, 3H), 6.91-6.88 (m, 4H), 6.75 (d,  $J = 7.6$  Hz, 1H), 6.59 (d,  $J = 6.4$  Hz, 1H), 6.07-6.03 (m, 1H), 5.30 (d,  $J = 13.6$  Hz, 1H), 5.15 (d,  $J = 8.4$  Hz, 1H), 4.97 (d,  $J = 12.8$  Hz, 1H), 4.65 (d,  $J = 12.8$  Hz, 1H), 4.21 (d,  $J = 9.6$  Hz, 1H), 4.15 (dt,  $J = 8.4$ , 2.0 Hz, 1H), 3.90-3.83 (m, 1H), 2.28 (dd,  $J = 10.4$ , 7.2 Hz, 1H), 2.13 (dd,  $J = 10.4$ , 6.4 Hz, 1H);  $^{13}\text{C}$  NMR (100 MHz, DMSO- $d_6$ )  $\delta$  203.9, 178.2, 142.2, 138.8, 136.8, 136.2, 131.1, 128.9, 128.3(2), 128.3(5), 127.6, 127.4, 125.2, 122.6, 117.3, 119.4, 59.7, 57.3, 53.6, 43.8, 43.5, 43.2; HRMS (TOF-ESI $^+$ )  $m/z$ : calcd for  $\text{C}_{28}\text{H}_{25}\text{NO}_2\text{Na}$   $[\text{M}+\text{Na}]^+$  430.1778, found 430.1797; HPLC analysis: Daicel Chiralpak AD-H (*i*-PrOH: *n*-Hexane = 80:20; flow rate: 1 mL/min;  $\lambda = 254$  nm;  $t_{\text{minor}} = 9.0$  min,  $t_{\text{major}} = 12.9$  min.

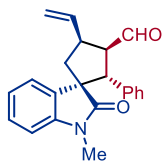

(1*S*,2*R*,3*R*,4*S*)-1'-methyl-2'-oxo-2-phenyl-4-vinylspiro[cyclopentane-1,3'-indoline]-3-carbaldehyde (**3ab**): white solid (33% yield, 21.8 mg, 0.066 mmol, 96% ee); m.p. 132-133 °C;  $[\alpha]_{\text{D}}^{25} -61.1$  ° (c 0.2,  $\text{CHCl}_3$ );  $^1\text{H}$  NMR (DMSO- $d_6$ , 400 MHz)  $\delta$  9.69 (d,  $J = 2.0$  Hz, 1H), 7.64 (d,  $J = 7.2$  Hz, 1H), 7.21 (t,  $J = 7.6$  Hz, 1H), 7.11 (t,  $J = 7.4$  Hz, 1H), 7.05-7.04 (m, 3H), 6.86-6.84 (m, 2H), 6.75 (d,  $J = 7.6$  Hz, 1H), 6.11-6.01 (m, 1H), 5.25 (d,  $J = 16.8$  Hz, 1H), 5.11 (d,  $J = 10.0$  Hz, 1H), 4.17 (dt,  $J = 11.6$ , 2.0 Hz, 1H), 4.07 (d,  $J = 11.2$  Hz, 1H), 3.91-3.82 (m, 1H), 2.79 (s, 3H), 2.31 (dd,  $J = 13.6$ , 8.0 Hz, 1H), 2.16 (dd,  $J = 13.6$ , 8.4 Hz, 1H);  $^{13}\text{C}$  NMR (DMSO- $d_6$ , 100 MHz)  $\delta$  204.1, 178.2, 143.8, 139.3, 136.9, 130.8, 128.6, 128.2, 128.0, 127.5, 123.1, 122.8, 116.9, 108.5, 59.4, 57.0, 53.7, 43.0, 41.9, 26.0 (d,  $J = 4.0$  Hz); HRMS (TOF-ESI $^+$ )  $m/z$ : calcd for  $\text{C}_{22}\text{H}_{21}\text{NO}_2\text{Na}$   $[\text{M}+\text{Na}]^+$  354.1465, found 354.1462; HPLC analysis: Daicel Chiralpak OD-H (*i*-PrOH: *n*-Hexane = 90:10; flow rate: 1 mL/min;  $\lambda = 254$  nm;  $t_{\text{minor}} = 6.0$  min,  $t_{\text{major}} = 6.4$  min.

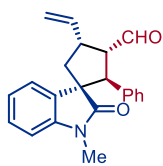

(1*S*,2*S*,3*S*,4*R*)-1'-methyl-2'-oxo-2-phenyl-4-vinylspiro[cyclopentane-1,3'-indoline]-3-carbaldehyde (**4ab**): white solid (42% yield, 27.8 mg, 0.084 mmol, 99% ee); m.p. 139-140 °C;  $[\alpha]_{\text{D}}^{25} -84.2$  ° (c 0.3,  $\text{CHCl}_3$ );  $^1\text{H}$  NMR (DMSO- $d_6$ , 400 MHz)  $\delta$  9.73 (s, 1H), 7.57 (d,  $J = 7.2$  Hz, 1H), 7.15 (t,  $J = 7.2$  Hz, 1H), 7.01-6.98 (m,

4H), 6.88-6.86 (m, 2H), 6.77 (d,  $J = 7.6$  Hz, 1H), 6.11-6.02 (m, 1H), 5.29 (d,  $J = 16.8$  Hz, 1H), 5.15 (d,  $J = 10.0$  Hz, 1H), 4.16-4.15 (m, 2H), 3.88-3.79 (m, 1H), 3.03 (s, 3H), 2.23 (dd,  $J = 13.2, 8.8$  Hz, 1H), 2.10 (dd,  $J = 12.8, 7.6$  Hz, 1H);  $^{13}\text{C}$  NMR (DMSO- $d_6$ , 100 MHz)  $\delta$  203.8, 143.1, 138.9, 136.9, 131.1, 128.3, 128.1, 127.8, 127.2, 124.8, 122.4, 117.2, 108.6, 56.9, 56.8, 53.3, 43.8, 42.9, 26.6; HRMS (TOF-ESI $^+$ )  $m/z$ : calcd for  $\text{C}_{22}\text{H}_{21}\text{NO}_2\text{Na}$   $[\text{M}+\text{Na}]^+$  354.1465, found 354.1482; HPLC analysis: Daicel Chiralpak AD-H (*i*-PrOH: *n*-Hexane = 80:20; flow rate: 1 mL/min;  $\lambda = 254$  nm;  $t_{\text{major}} = 9.5$  min,  $t_{\text{minor}} = 9.9$  min.

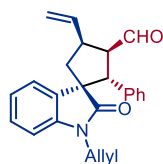

(1*S*,2*R*,3*R*,4*S*)-1'-allyl-2'-oxo-2-phenyl-4-vinylspiro[cyclopentane-1,3'-indoline]-3-carbaldehyde (**3ac**, major diastereomer): white solid (36% yield, 25.7 mg, 0.072 mmol, 97% ee); m.p. 105-107 °C;  $[\alpha]_{\text{D}}^{25} -27.0^\circ$  (c 0.2,  $\text{CHCl}_3$ );  $^1\text{H}$  NMR (DMSO- $d_6$ , 400 MHz)  $\delta$  9.71 (d,  $J = 2.4$  Hz, 1H), 7.69 (d,  $J = 6.4$  Hz, 1H), 7.22-7.13 (m, 3H), 7.09-7.05 (m, 2H), 6.89-6.86 (m, 2H), 6.72-6.65 (m, 1H), 6.14-6.03 (m, 1H), 5.27 (d,  $J = 17.6$  Hz, 1H), 5.13 (dd,  $J = 10.4, 1.6$  Hz, 1H), 5.0 (dd,  $J = 24.4, 8.8$  Hz, 1H), 4.76 (d,  $J = 10.4$  Hz, 1H), 4.25-4.21 (m, 3H), 3.91-3.84 (m, 3H), 2.35 (dd,  $J = 13.2, 7.6$  Hz, 1H), 2.20 (dd,  $J = 13.2, 8.0$  Hz, 1H);  $^{13}\text{C}$  NMR (DMSO- $d_6$ , 100 MHz)  $\delta$  204.0, 178.8, 142.9, 139.3, 136.7, 131.7, 130.8, 129.9, 128.5, 128.2, 127.4, 123.3, 116.4, 109.1, 59.4, 56.8, 53.5, 43.0, 42.2, 41.4; HRMS (TOF-ESI $^+$ )  $m/z$ : calcd for  $\text{C}_{24}\text{H}_{23}\text{NO}_2\text{Na}$   $[\text{M}+\text{Na}]^+$  380.1621, found 380.1624; HPLC analysis: Daicel Chiralpak OD-H (*i*-PrOH: *n*-Hexane = 90:10; flow rate: 1 mL/min;  $\lambda = 254$  nm;  $t_{\text{minor}} = 5.4$  min,  $t_{\text{major}} = 6.4$  min.

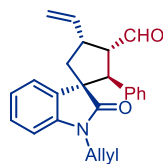

(1*S*,2*S*,3*S*,4*R*)-1'-allyl-2'-oxo-2-phenyl-4-vinylspiro[cyclopentane-1,3'-indoline]-3-carbaldehyde (**4ac**, major diastereomer): white solid (42% yield, 30.0 mg, 0.084 mmol, 92% ee); m.p. 88-90 °C;  $[\alpha]_{\text{D}}^{25} -28.9^\circ$  (c 0.3,  $\text{CHCl}_3$ );  $^1\text{H}$  NMR (DMSO- $d_6$ , 400 MHz)  $\delta$  9.74 (s, 1H), 7.62 (d,  $J = 7.6$  Hz, 1H), 7.13 (t,  $J = 7.6$  Hz, 1H), 7.04-7.00 (m, 3H), 6.91-6.89 (m, 2H), 6.69 (d,  $J = 7.6$  Hz, 1H), 6.11-6.02 (m, 1H), 5.68-5.58 (m, 1H), 5.30 (d,  $J = 16.4$  Hz, 1H), 5.15 (d,  $J = 10.0$  Hz, 1H), 4.93 (d,  $J = 10.4$  Hz, 1H), 4.58 (d,  $J = 17.2$  Hz, 1H), 4.35 (td,  $J = 16.8, 2.4$  Hz, 1H), 4.17 (d,  $J = 4.4$  Hz, 2H), 4.10 (dd,  $J = 16.8, 4.8$  Hz, 1H), 3.91-3.82 (m, 1H), 2.25 (dd,  $J = 12.8, 8.8$  Hz, 1H), 2.12 (dd,  $J = 12.8, 7.6$  Hz, 1H);  $^{13}\text{C}$  NMR (DMSO- $d_6$ , 100 MHz)  $\delta$  203.8, 177.8, 142.2, 138.8, 136.7, 131.8, 131.0, 128.3, 128.1, 127.3, 125.0, 122.4, 117.3, 116.7, 109.3, 59.6, 57.0, 53.5, 43.7, 43.1, 42.0; HRMS (TOF-ESI $^+$ )  $m/z$ : calcd for  $\text{C}_{24}\text{H}_{23}\text{NO}_2\text{Na}$   $[\text{M}+\text{Na}]^+$  380.1621, found 380.1633; HPLC analysis: Daicel Chiralpak AD-H (*i*-PrOH: *n*-Hexane = 90:10; flow rate: 1 mL/min;  $\lambda = 254$  nm;  $t_{\text{major}} = 9.0$  min,  $t_{\text{minor}} = 11.1$  min.

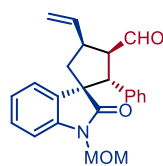

(1*S*,2*R*,3*R*,4*S*)-1'-methoxymethyl-2'-oxo-2-phenyl-4-vinylspiro[cyclopentane-1,3'-indoline]-3-carbaldehyde (**3ad**): white solid (31% yield, 22.4 mg, 0.062 mmol, 73% ee); m.p. 121-122 °C;  $[\alpha]_{\text{D}}^{25} -32.1^\circ$  (c 0.2,  $\text{CHCl}_3$ );  $^1\text{H}$  NMR (DMSO- $d_6$ , 400 MHz)  $\delta$  9.72 (d,  $J = 2.4$  Hz, 1H), 7.73 (d,  $J = 6.8$  Hz, 1H), 7.27-7.19 (m, 3H),

7.07-7.06 (m, 2H), 6.90-6.85 (m, 3H), 6.14-6.05 (m, 1H), 5.28 (d,  $J = 16.8$  Hz, 1H), 5.14 (dd,  $J = 10.0, 1.2$  Hz, 1H), 4.80 (dd,  $J = 16.4, 11.2$  Hz, 2H), 4.26 (dt,  $J = 11.2, 2.0$  Hz, 1H), 4.17 (d,  $J = 11.6, 1H$ ), 3.87 (t,  $J = 9.2, 1H$ ), 2.54-2.49 (m, 3H), 2.38 (dd,  $J = 13.6, 8.0$  Hz, 1H), 2.20 (dd,  $J = 13.2, 8.0$  Hz, 3H);  $^{13}\text{C}$  NMR (DMSO- $d_6$ , 100 MHz)  $\delta$  204.0, 178.9, 142.2, 139.2, 136.8, 130.6, 128.6, 128.3, 128.1, 127.5, 125.3, 123.0, 117.0, 109.6, 70.8, 59.7, 56.8, 55.2(d,  $J = 6.0$  Hz), 53.3, 43.0, 42.8; HRMS (TOF-ESI $^+$ )  $m/z$ : calcd for  $\text{C}_{23}\text{H}_{23}\text{NO}_3\text{Na}$   $[\text{M}+\text{Na}]^+$  384.1570, found 384.1581; HPLC analysis: Daicel Chiralpak OD-H (*i*-PrOH: *n*-Hexane = 80:20; flow rate: 1 mL/min;  $\lambda = 254$  nm;  $t_{\text{minor}} = 4.7$  min,  $t_{\text{major}} = 6.3$  min.

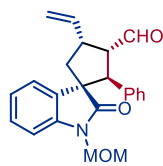

(1*S*,2*S*,3*S*,4*R*)-1'-methoxymethyl-2'-oxo-2-phenyl-4-vinylspiro[cyclopentane-1,3'-indoline]-3-carbaldehyde (**4ad**): white solid (51% yield, 36.8 mg, 0.102 mmol, 89% ee); m.p. 100-102 °C;  $[\alpha]_{\text{D}}^{25} -6.8^\circ$  (c 1.32,  $\text{CHCl}_3$ );  $^1\text{H}$  NMR (DMSO- $d_6$ , 400 MHz)  $\delta$  9.74 (s, 1H), 7.66 (d,  $J = 7.2$  Hz, 1H), 7.17 (t,  $J = 7.6$  Hz, 1H), 7.08 (d,  $J = 7.6$  Hz, 1H), 7.21-7.08 (m, 3H), 6.94-6.92 (m, 2H), 6.88 (d,  $J = 8.0$  Hz, 1H), 6.11-6.02 (m, 1H), 5.30 (d,  $J = 16.8$  Hz, 1H), 5.15 (dd,  $J = 8.8, 1.2$  Hz, 1H), 4.99 (dd,  $J = 20.0, 10.8$  Hz, 2H), 4.22-4.17 (m, 2H), 3.91-3.83 (m, 1H), 2.96 (s, 3H), 2.26 (dd,  $J = 13.2, 9.2$  Hz, 1H), 2.14 (dd,  $J = 12.8, 7.6$  Hz, 1H);  $^{13}\text{C}$  NMR (DMSO- $d_6$ , 100 MHz)  $\delta$  203.7, 178.9, 141.6, 138.7, 136.8, 130.7, 128.4, 128.2, 128.1, 127.4, 125.3, 123.0, 117.3, 109.8, 71.3, 60.0, 57.1, 55.9, 53.5, 43.8, 43.6; HRMS (TOF-ESI $^+$ )  $m/z$ : calcd for  $\text{C}_{23}\text{H}_{23}\text{NO}_3\text{K}$   $[\text{M}+\text{K}]^+$  400.1310, found 400.1338; HPLC analysis: Daicel Chiralpak AD-H (*i*-PrOH: *n*-Hexane = 80:20; flow rate: 1 mL/min;  $\lambda = 254$  nm;  $t_{\text{minor}} = 9.8$  min,  $t_{\text{major}} = 11.6$  min.

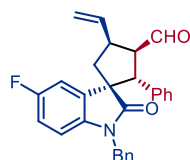

(1*S*,2*R*,3*R*,4*S*)-1'-benzyl-5'-fluoro-2'-oxo-2-phenyl-4-vinylspiro[cyclopentane-1,3'-indoline]-3-carbaldehyde (**3ae**): white solid (49% yield, 41.7 mg, 0.098 mmol, 93% ee); m.p. 131-132 °C;  $[\alpha]_{\text{D}}^{25} -107.7^\circ$  (c 0.4,  $\text{CHCl}_3$ );  $^1\text{H}$  NMR (DMSO- $d_6$ , 400 MHz)  $\delta$  9.71 (d,  $J = 2.4$  Hz, 1H), 7.74 (dd,  $J = 8.4, 2.4$  Hz, 1H), 7.22-7.19 (m, 1H), 7.16-7.07 (m, 5H), 6.97-6.92 (m, 3H), 6.52 (d,  $J = 7.2$  Hz, 2H), 6.45 (dd,  $J = 8.4, 4.4$  Hz, 1H), 6.13-6.04 (m, 1H), 5.28 (d,  $J = 17.2$  Hz, 1H), 5.13 (dd,  $J = 10.0, 1.6$  Hz, 1H), 4.86 (d,  $J = 16.4$  Hz, 1H), 4.41 (d,  $J = 16.4$  Hz, 1H), 4.31-4.28 (m, 1H), 4.23 (d,  $J = 11.6$  Hz, 1H), 3.91-3.87 (m, 1H), 2.40 (dd,  $J = 13.6, 8.0$  Hz, 1H), 2.25 (dd,  $J = 13.2, 8.4$  Hz, 1H);  $^{13}\text{C}$  NMR (DMSO- $d_6$ , 100 MHz)  $\delta$  203.8, 178.1, 159.2 (d,  $J_{\text{C-F}} = 236.0$  Hz), 139.3, 139.0, 136.6, 135.9, 134.4 (d,  $J_{\text{C-F}} = 281$  Hz), 128.9, 128.6, 128.2, 127.7, 127.4, 126.8, 117.0, 114.7 (d,  $J_{\text{C-F}} = 230.0$  Hz), 111.7 (d,  $J_{\text{C-F}} = 26.0$  Hz), 110.0 (d,  $J_{\text{C-F}} = 8.0$  Hz), 56.0, 56.7, 53.1, 42.9, 42.8, 42.6; HRMS (TOF-ESI $^+$ )  $m/z$ : calcd for  $\text{C}_{28}\text{H}_{24}\text{FNO}_2\text{Na}$   $[\text{M}+\text{Na}]^+$  448.1683, found 448.1687; HPLC analysis: Daicel Chiralpak OD-H (*i*-PrOH: *n*-Hexane = 80:20; flow rate: 1 mL/min;  $\lambda = 254$  nm;  $t_{\text{minor}} = 5.6$  min,  $t_{\text{major}} = 7.5$  min.

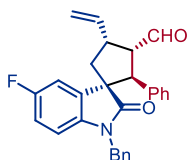

(1*S*,2*S*,3*S*,4*R*)-1'-benzyl-5'-fluoro-2'-oxo-2-phenyl-4-vinylspiro[cyclopentane-1,3'-indoline]-3-carbaldehyde (**4ae**): white solid (45% yield, 38.3 mg, 0.090 mmol, 92% ee); m.p. 128-129 °C;  $[\alpha]_D^{25}$   $-11.7^\circ$  (c 0.4, CHCl<sub>3</sub>); <sup>1</sup>H NMR (DMSO-*d*<sub>6</sub>, 400 MHz)  $\delta$  9.75 (s, 1H), 7.63 (d, *J* = 7.2 Hz, 1H), 7.22-7.21 (m, 3H), 7.06-7.03 (m, 3H), 6.96-6.90 (m, 5H), 6.59 (dd, *J* = 8.8, 4.4 Hz, 1H), 6.12-6.03 (m, 1H), 5.32 (d, *J* = 16.8 Hz, 1H), 5.16 (d, *J* = 10.0 Hz, 1H), 4.99 (d, *J* = 16.0 Hz, 1H), 4.68 (d, *J* = 16.0 Hz, 1H), 4.25-4.24 (m, 2H), 3.95-3.87 (m, 1H), 2.28 (dd, *J* = 12.8, 8.8 Hz, 1H), 2.19 (dd, *J* = 12.8, 7.6 Hz, 1H); <sup>13</sup>C NMR (DMSO-*d*<sub>6</sub>, 100 MHz)  $\delta$  203.7, 178.2, 158.8 (d, *J*<sub>C-F</sub> = 236.0 Hz), 138.7, 138.4, 136.7, 136.0, 132.9 (d, *J*<sub>C-F</sub> = 9.0), 128.9, 128.4, 128.2, 127.7, 127.5, 127.3, 117.4, 114.5 (d, *J*<sub>C-F</sub> = 23.0), 113.4 (d, *J*<sub>C-F</sub> = 25.0), 110.1 (d, *J* = 8.0 Hz), 60.2, 56.0, 53.5, 43.6, 43.4, 42.2; HRMS (TOF-ESI<sup>+</sup>) *m/z*: calcd for C<sub>28</sub>H<sub>24</sub>FNO<sub>2</sub>Na [M+Na]<sup>+</sup> 448.1683, found 448.1689; HPLC analysis: Daicel Chiralpak AD-H (*i*-PrOH: *n*-Hexane = 90:10; flow rate: 1 mL/min;  $\lambda$  = 254 nm; *t*<sub>major</sub> = 14.6 min, *t*<sub>minor</sub> = 22.4 min.

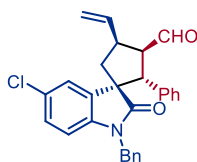

(1*S*,2*R*,3*R*,4*S*)-1'-benzyl-5'-chloro-2'-oxo-2-phenyl-4-vinylspiro[cyclopentane-1,3'-indoline]-3-carbaldehyde (**3af**): white solid (36% yield, 31.8 mg, 0.072 mmol, 96% ee); m.p. 154-155 °C;  $[\alpha]_D^{25}$   $-152.1^\circ$  (c 0.3, CHCl<sub>3</sub>); <sup>1</sup>H NMR (DMSO-*d*<sub>6</sub>, 400 MHz)  $\delta$  9.70 (s, 1H), 7.92 (d, *J* = 2.0 Hz, 1H), 7.23-7.18 (m, 2H), 7.16-7.08 (m, 5H), 6.94 (d, *J* = 7.6 Hz, 2H), 6.48 (dd, *J* = 11.6, 7.2 Hz, 3H), 6.15-6.06 (m, 1H), 5.27 (d, *J* = 16.8 Hz, 1H), 5.13 (d, *J* = 10.0 Hz, 1H), 4.87 (d, *J* = 16.4 Hz, 1H), 4.41 (d, *J* = 16.0 Hz, 1H), 4.27-4.26 (m, 2H), 3.92-3.84 (m, 1H), 2.40 (dd, *J* = 13.6, 8.0 Hz, 1H), 2.28 (dd, *J* = 13.2, 8.4 Hz, 1H); <sup>13</sup>C NMR (DMSO-*d*<sub>6</sub>, 100 MHz)  $\delta$  203.8, 177.9, 141.7, 139.2, 136.6, 135.7, 133.2, 128.9, 128.6, 128.4, 128.2, 127.7, 127.4, 127.2, 126.8, 124.0, 117.0, 110.6, 59.8, 56.8, 53.0, 43.0, 42.7, 42.6; HRMS (TOF-ESI<sup>+</sup>) *m/z*: calcd for C<sub>28</sub>H<sub>25</sub>ClNO<sub>2</sub> [M+H]<sup>+</sup> 442.1568, found 442.1558; HPLC analysis: Daicel Chiralpak OD-H (*i*-PrOH: *n*-Hexane = 80:20; flow rate: 1 mL/min;  $\lambda$  = 254 nm; *t*<sub>minor</sub> = 5.6 min, *t*<sub>major</sub> = 7.6 min.

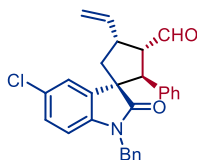

(1*S*,2*S*,3*S*,4*R*)-1'-benzyl-5'-chloro-2'-oxo-2-phenyl-4-vinylspiro[cyclopentane-1,3'-indoline]-3-carbaldehyde (**4af**): white solid (49% yield, 43.2 mg, 0.098 mmol, 94% ee); m.p. 157-158 °C;  $[\alpha]_D^{25}$   $-61.3^\circ$  (c 0.4, CHCl<sub>3</sub>); <sup>1</sup>H NMR (DMSO-*d*<sub>6</sub>, 400 MHz)  $\delta$  9.74 (d, *J* = 1.6 Hz, 1H), 7.74 (s, 1H), 7.22-7.21 (m, 3H), 7.14 (dd, *J* = 8.4, 1.6 Hz, 1H), 7.08-7.05 (m, 3H), 6.94-6.92 (m, 4H), 6.62 (d, *J* = 8.4 Hz, 1H), 6.11-6.02 (m, 1H), 5.32 (d, *J* = 16.8 Hz, 1H), 5.16 (d, *J* = 10.0 Hz, 1H), 4.99 (d, *J* = 16.0 Hz, 1H), 4.68 (d, *J* = 16.0 Hz, 1H), 4.30-4.21 (m, 2H), 3.94-3.85 (m, 1H), 2.30-2.19 (m, 2H); <sup>13</sup>C NMR (DMSO-*d*<sub>6</sub>, 100 MHz)  $\delta$  203.6, 178.1, 141.1, 138.8, 136.6, 135.9, 133.3, 128.9, 128.4, 128.2, 127.7, 127.5, 127.3, 126.9, 125.3, 117.4, 110.7, 59.8, 57.0, 53.6, 43.6, 43.3, 43.2; HRMS

(TOF-ESI<sup>+</sup>) m/z: calcd for C<sub>28</sub>H<sub>24</sub>CINO<sub>2</sub>Na [M+Na]<sup>+</sup> 464.1388, found 464.1385; HPLC analysis: Daicel Chiralpak AD-H (*i*-PrOH: *n*-Hexane = 90:10 flow rate: 1 mL/min; λ = 254 nm; *t*<sub>major</sub> = 15.6 min, *t*<sub>minor</sub> = 21.1 min.

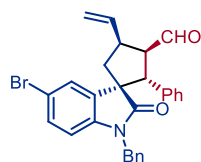

(1*S*,2*R*,3*R*,4*S*)-1'-benzyl-5'-bromo-2'-oxo-2-phenyl-4-vinylspiro[cyclopentane-1,3'-indoline]-3-carbaldehyde (**3ag**): white solid (33% yield, 32.0 mg, 0.066 mmol, 90% ee); m.p. 195-196 °C; [α]<sub>D</sub><sup>25</sup> -96.2° (c 0.3, CHCl<sub>3</sub>); <sup>1</sup>H NMR (DMSO-*d*<sub>6</sub>, 400 MHz) δ 9.70 (s, 1H), 8.04 (s, 1H), 7.30 (d, *J* = 8.4 Hz, 1H), 7.21 (t, *J* = 7.2 Hz, 1H), 7.15-7.06 (m, 5H), 6.94 (d, *J* = 7.6 Hz, 2H), 6.50 (d, *J* = 7.2 Hz, 2H), 6.42 (d, *J* = 8.0 Hz, 1H), 6.15-6.06 (m, 1H), 5.27 (d, *J* = 16.8 Hz, 1H), 5.13 (d, *J* = 10.0 Hz, 1H), 4.86 (d, *J* = 16.0 Hz, 1H), 4.41 (d, *J* = 16.4 Hz, 1H), 4.27-4.26 (m, 1H), 3.90-3.88 (m, 1H), 2.39 (dd, *J* = 13.2, 7.6 Hz, 1H), 2.28 (dd, *J* = 13.2, 8.4 Hz, 1H); <sup>13</sup>C NMR (DMSO-*d*<sub>6</sub>, 100 MHz) δ 203.8, 177.8, 142.1, 139.2, 136.6, 135.7, 133.5, 131.2, 128.9, 128.6, 128.2, 127.7, 127.4, 126.8, 126.6, 117.0, 115.0, 111.1, 59.8, 56.8, 53.0, 43.0, 42.7, 42.6; HRMS (TOF-ESI<sup>+</sup>) m/z: calcd for C<sub>28</sub>H<sub>24</sub>BrNO<sub>2</sub>Na [M+Na]<sup>+</sup> 508.0883, found 508.0894; HPLC analysis: Daicel Chiralpak OD-H (*i*-PrOH: *n*-Hexane = 80:20; flow rate: 1 mL/min; λ = 254 nm; *t*<sub>minor</sub> = 5.7 min, *t*<sub>major</sub> = 7.9 min.

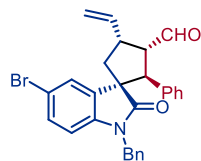

(1*S*,2*S*,3*S*,4*R*)-1'-benzyl-5'-bromo-2'-oxo-2-phenyl-4-vinylspiro[cyclopentane-1,3'-indoline]-3-carbaldehyde (**4ag**): white solid (46% yield, 44.6 mg, 0.092 mmol, 91% ee); m.p. 163-164 °C; [α]<sub>D</sub><sup>25</sup> +61.3° (c 0.4, CHCl<sub>3</sub>); <sup>1</sup>H NMR (DMSO-*d*<sub>6</sub>, 400 MHz) δ 9.74 (s, 1H), 7.85 (s, 1H), 7.27 (d, *J* = 8.4 Hz, 1H), 7.22-7.21 (m, 3H), 7.10-7.03 (m, 3H), 6.97-6.92 (m, 4H), 6.58 (d, *J* = 8.4 Hz, 1H), 6.11-6.02 (m, 1H), 5.32 (d, *J* = 16.4 Hz, 1H), 5.16 (d, *J* = 10.0 Hz, 2H), 4.99 (d, *J* = 16.0 Hz, 1H), 4.67 (d, *J* = 16.0 Hz, 1H), 4.30-4.20 (m, 2H), 3.93-3.85 (m, 1H), 2.30-2.19 (m, 2H); <sup>13</sup>C NMR (DMSO-*d*<sub>6</sub>, 100 MHz) δ 203.6, 178.0, 141.6, 138.8, 136.6, 135.9, 133.7, 131.1, 128.9, 128.4, 128.2, 127.9, 127.7, 127.5, 127.3, 117.4, 114.7, 111.3, 59.9, 57.0, 53.6, 43.6, 43.3, 43.2; HRMS (TOF-ESI<sup>+</sup>) m/z: calcd for C<sub>28</sub>H<sub>24</sub>BrNO<sub>2</sub>Na [M+Na]<sup>+</sup> 508.0883, found 508.0854; HPLC analysis: Daicel Chiralpak AD-H (*i*-PrOH: *n*-Hexane = 90:10; flow rate: 1 mL/min; λ = 254 nm; *t*<sub>major</sub> = 13.8 min, *t*<sub>minor</sub> = 20.5 min.

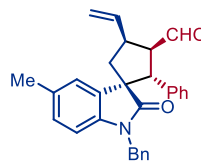

(1*S*,2*R*,3*R*,4*S*)-1'-benzyl-5'-methyl-2'-oxo-2-phenyl-4-vinylspiro[cyclopentane-1,3'-indoline]-3-carbaldehyde (**3ah**): white solid (29% yield, 24.4 mg, 0.058 mmol, 93% ee); m.p. 152-153 °C; [α]<sub>D</sub><sup>25</sup> -80.0° (c 0.2, CHCl<sub>3</sub>); <sup>1</sup>H NMR (DMSO-*d*<sub>6</sub>, 400 MHz) δ 9.72 (d, *J* = 2.4 Hz, 1H), 7.55 (s, 1H), 7.18 (d, *J* = 7.2 Hz, 1H), 7.13-7.07 (m, 5H), 6.92 (t, *J* = 8.8 Hz, 3H), 6.51 (d, *J* = 7.2 Hz, 2H), 6.35 (d, *J* = 7.6 Hz,

1H), 6.14-6.05 (m, 1H), 5.27 (d,  $J = 16.8$  Hz, 1H), 5.13 (d,  $J = 10.4$  Hz, 1H), 4.84 (d,  $J = 16.0$  Hz, 1H), 4.38 (d,  $J = 16.4$  Hz, 1H), 4.30-4.25 (m, 1H), 4.18 (d,  $J = 11.2$  Hz, 1H), 3.93-3.85 (m, 1H), 2.37 (dd,  $J = 13.6, 8.0$  Hz, 1H), 2.33 (s, 1H), 2.21 (dd,  $J = 12.8, 4.4$  Hz, 1H);  $^{13}\text{C}$  NMR (DMSO- $d_6$ , 100 MHz)  $\delta$  204.1, 178.2, 140.5, 139.3, 136.9, 136.1, 132.0, 131.0, 128.8, 128.5, 128.3, 127.6, 127.3, 126.8, 124.0, 117.0, 109.0, 59.5, 57.0, 53.1, 43.0, 42.9, 42.6, 21.3; HRMS (TOF-ESI $^+$ )  $m/z$ : calcd for  $\text{C}_{29}\text{H}_{27}\text{NO}_2\text{Na}$   $[\text{M}+\text{Na}]^+$  444.1934, found 444.1937; HPLC analysis: Daicel Chiralpak OD-H (*i*-PrOH: *n*-Hexane = 80:20; flow rate: 1 mL/min;  $\lambda = 254$  nm;  $t_{\text{minor}} = 5.0$  min,  $t_{\text{major}} = 7.4$  min.

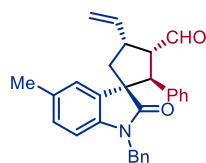

(1*S*,2*S*,3*S*,4*R*)-1'-benzyl-5'-methyl-2'-oxo-2-phenyl-4-vinylspiro[cyclopentane-1,3'-indoline]-3-carbaldehyde (**4ah**): white solid (37% yield, 31.2 mg, 0.074 mmol, 94% ee); m.p. 149-150 °C;  $[\alpha]_{\text{D}}^{25} +64.2^\circ$  (c 0.3,  $\text{CHCl}_3$ );  $^1\text{H}$  NMR (DMSO- $d_6$ , 400 MHz)  $\delta$  9.75 (d,  $J = 2.0$  Hz, 1H), 7.51 (s, 1H), 7.19-7.17 (m, 3H), 7.07-7.05 (m, 3H), 6.93 (d,  $J = 7.2$  Hz, 2H), 6.88-6.87 (m, 3H), 6.47 (d,  $J = 8.0$  Hz, 1H), 6.12-6.03 (m, 1H), 5.31 (d,  $J = 16.8$  Hz, 1H), 5.16 (d,  $J = 10.0$  Hz, 1H), 4.97 (d,  $J = 16.0$  Hz, 1H), 4.63 (d,  $J = 14.0$  Hz, 1H), 4.23-4.17 (m, 2H), 3.90 (dd,  $J = 18.0, 9.2$  Hz, 1H), 2.31 (s, 3H), 2.28-2.21 (m, 1H), 2.12 (dd,  $J = 12.8, 7.6$  Hz, 1H);  $^{13}\text{C}$  NMR (DMSO- $d_6$ , 100 MHz)  $\delta$  204.0, 178.0, 139.8, 138.9, 136.9, 136.3, 131.6, 131.1, 128.8, 128.5, 128.4, 128.3, 127.5, 127.4, 127.2, 159.9, 117.2, 109.1, 59.8, 57.3, 53.5, 43.7, 43.5, 43.2, 21.2; HRMS (TOF-ESI $^+$ )  $m/z$ : calcd for  $\text{C}_{29}\text{H}_{27}\text{NO}_2\text{Na}$   $[\text{M}+\text{Na}]^+$  444.1934, found 444.1930; HPLC analysis: Daicel Chiralpak AD-H (*i*-PrOH: *n*-Hexane = 90:10; flow rate: 1 mL/min;  $\lambda = 254$  nm;  $t_{\text{major}} = 12.5$  min,  $t_{\text{minor}} = 18.5$  min.

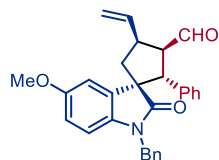

(1*S*,2*R*,3*R*,4*S*)-1'-benzyl-5'-methoxyl-2'-oxo-2-phenyl-4-vinylspiro[cyclopentane-1,3'-indoline]-3-carbaldehyde (**3ai**): white solid (42% yield, 36.7 mg, 0.084 mmol, 99% ee); m.p. 128-129 °C;  $[\alpha]_{\text{D}}^{25} -67.0^\circ$  (c 0.3,  $\text{CHCl}_3$ );  $^1\text{H}$  NMR (DMSO- $d_6$ , 400 MHz)  $\delta$  9.72 (d,  $J = 2.4$  Hz, 1H), 7.42 (d,  $J = 2.4$  Hz, 1H), 7.19 (t,  $J = 7.4$  Hz, 1H), 7.15-7.06 (m, 5H), 6.96 (d,  $J = 7.6$  Hz, 2H), 6.66 (dd,  $J = 8.4, 2.4$  Hz, 1H), 6.52 (d,  $J = 6.8$  Hz, 2H), 6.36 (d,  $J = 8.4$  Hz, 1H), 6.15-6.05 (m, 1H), 5.27 (d,  $J = 17.2$  Hz, 1H), 5.13 (d,  $J = 11.2$  Hz, 1H), 4.84 (d,  $J = 16.4$  Hz, 1H), 4.38 (d,  $J = 16.4$  Hz, 1H), 4.28 (dd,  $J = 10.4, 1.6$  Hz, 1H), 4.22 (d,  $J = 11.2$  Hz, 1H), 3.93-3.84 (m, 1H), 3.77 (s, 3H), 2.37 (dd,  $J = 13.2, 8.0$  Hz, 1H), 2.24 (dd,  $J_1 = 13.2, 8.4$  Hz, 1H);  $^{13}\text{C}$  NMR (DMSO- $d_6$ , 100 MHz)  $\delta$  204.0, 178.0, 156.2, 139.4, 136.9, 136.2, 136.1, 132.2, 128.8, 128.5, 128.3, 127.6, 127.3, 126.8, 116.9, 113.2, 110.5, 109.7, 59.9, 56.9, 56.1, 56.0, 53.0, 42.9, 42.7.3; HRMS (TOF-ESI $^+$ )  $m/z$ : calcd for  $\text{C}_{29}\text{H}_{27}\text{NO}_3\text{Na}$   $[\text{M}+\text{Na}]^+$  460.1883, found 460.1878; HPLC analysis: Daicel Chiralpak OD-H (*i*-PrOH: *n*-Hexane = 80:20; flow rate: 1 mL/min;  $\lambda = 254$  nm;  $t_{\text{minor}} = 6.6$  min,  $t_{\text{major}} = 8.2$  min.

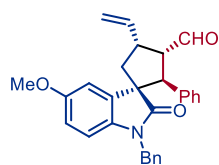

(1*S*,2*S*,3*S*,4*R*)-1'-benzyl-5'-methoxy-2'-oxo-2-phenyl-4-vinylspiro[cyclopentane-1,3'-indoline]-3-carbaldehyde (**4ai**): white solid (46% yield, 40.2 mg, 0.092 mmol, 93% ee); m.p. 107-109 °C;  $[\alpha]_{\text{D}}^{25} +59.2^{\circ}$  (c 0.4, CHCl<sub>3</sub>); <sup>1</sup>H NMR (DMSO-*d*<sub>6</sub>, 400 MHz)  $\delta$  9.75 (s, 1H), 7.24-7.19 (m, 4H), 7.07-7.04 (m, 3H), 6.96-6.92 (m, 4H), 6.64 (dd, *J* = 8.8, 2.4 Hz, 1H), 6.50 (d, *J* = 8.4 Hz, 1H), 6.12-6.03 (m, 1H), 5.32 (d, *J* = 17.2 Hz, 1H), 5.16 (d, *J* = 10.0 Hz, 1H), 4.96 (d, *J* = 16.0 Hz, 1H), 4.64 (d, *J* = 16.0 Hz, 1H), 4.24-4.20 (m, 2H), 3.88 (dd, *J* = 18.0, 9.6 Hz, 1H), 3.75 (s, 3H), 2.27 (dd, *J* = 12.8, 8.8 Hz, 1H), 2.16 (dd, *J* = 12.8, 7.6 Hz, 1H); <sup>13</sup>C NMR (DMSO-*d*<sub>6</sub>, 100 MHz)  $\delta$  203.8, 178.0, 155.7, 138.9, 136.9, 136.3, 135.7, 132.5, 128.9, 128.3, 127.5, 127.4, 127.3, 117.2, 112.8, 112.6, 109.7, 100.0, 60.1, 57.1, 56.2, 53.3, 43.6, 43.5, 43.3; HRMS (TOF-ESI<sup>+</sup>) *m/z*: calcd for C<sub>29</sub>H<sub>27</sub>NO<sub>3</sub>Na [M+Na]<sup>+</sup> 460.1883, found 460.1887; HPLC analysis: Daicel Chiralpak AD-H (*i*-PrOH: *n*-Hexane = 80:20; flow rate: 1 mL/min;  $\lambda$  = 254 nm; *t*<sub>major</sub> = 12.5 min, *t*<sub>minor</sub> = 18.8 min.

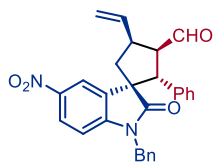

(1*S*,2*R*,3*R*,4*S*)-1'-benzyl-5'-nitro-2'-oxo-2-phenyl-4-vinylspiro[cyclopentane-1,3'-indoline]-3-carbaldehyde (**4aj**): white solid (43% yield, 38.9 mg, 0.086 mmol); m.p. 132-134 °C;  $[\alpha]_{\text{D}}^{25} -56.5^{\circ}$  (c 0.4, CHCl<sub>3</sub>); <sup>1</sup>H NMR (400 MHz, DMSO-*d*<sub>6</sub>)  $\delta$  9.73 (d, *J* = 2.4 Hz, 1H), 8.79 (s, 1H), 8.11 (dd, *J* = 8.4, 1.6 Hz, 1H), 7.21 (t, *J* = 7.6 Hz, 1H), 7.16-7.08 (m, 5H), 6.94 (d, *J* = 7.6 Hz, 2H), 6.70 (d, *J* = 8.4 Hz, 1H), 6.49 (d, *J* = 7.2 Hz, 2H), 6.19-6.10 (m, 1H), 5.30 (d, *J* = 16.8 Hz, 1H), 5.15 (d, *J* = 10.0 Hz, 1H), 4.95 (d, *J* = 16.4 Hz, 1H), 4.52 (d, *J* = 16.4 Hz, 1H), 4.43 (d, *J* = 11.6 Hz, 1H), 4.28 (t, *J* = 11.2 Hz, 1H), 3.87-3.96 (m, 1H), 2.44 (d, *J* = 8.4 Hz, 2H); <sup>13</sup>C NMR (100 MHz, DMSO-*d*<sub>6</sub>)  $\delta$  203.7, 178.6, 148.9, 143.5, 139.1, 136.3, 135.2, 132.1, 129.0, 128.7, 128.2, 127.9, 127.6, 126.7, 125.9, 119.7, 117.2, 109.4, 59.7, 56.5, 53.0, 43.0, 42.2; HRMS (TOF-ESI<sup>+</sup>) *m/z*: calcd for C<sub>14</sub>H<sub>13</sub>ClNaO<sub>5</sub> [M+Na]<sup>+</sup> 319.0344, found 319.0303; HRMS (TOF-ESI<sup>+</sup>) *m/z*: calcd for C<sub>28</sub>H<sub>24</sub>N<sub>2</sub>O<sub>4</sub>Na [M+Na]<sup>+</sup> 475.1628, found 475.1635; HPLC analysis: Daicel Chiralpak AS-H (*i*-PrOH: *n*-Hexane = 80:20; flow rate: 1 mL/min;  $\lambda$  = 254 nm; *t*<sub>minor</sub> = 15.6 min, *t*<sub>major</sub> = 30.7 min.

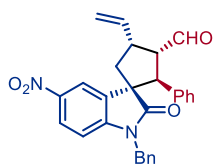

(1*S*,2*S*,3*S*,4*R*)-1'-benzyl-5'-nitro-2'-oxo-2-phenyl-4-vinylspiro[cyclopentane-1,3'-indoline]-3-carbaldehyde (**4aj**): white solid (38% yield, 34.3 mg, 0.076 mmol); m.p. 164-166 °C;  $[\alpha]_{\text{D}}^{25} +41.1^{\circ}$  (c 0.3, CHCl<sub>3</sub>); <sup>1</sup>H NMR (400 MHz, DMSO-*d*<sub>6</sub>)  $\delta$  9.75 (d, *J* = 2.0 Hz, 1H), 8.40 (d, *J* = 2.0 Hz, 1H), 8.067 (dd, *J* = 8.4, 2.0 Hz, 1H), 7.25-7.24 (m, 3H), 7.07-6.95 (m, 6H), 6.91-6.86 (m, 3H), 6.15-6.06 (m, 1H), 5.35 (d, *J* = 16.8 Hz, 1H), 5.18 (dd, *J* = 10.0, 1.2 Hz, 1H), 5.07 (d, *J* = 16.0 Hz, 1H), 4.78 (d, *J* = 16.0 Hz, 1H), 4.40-4.34 (m, 1H), 4.25 (d, *J* = 12.0 Hz, 1H), 3.98-3.90 (m, 1H), 2.37 (dd, *J* = 13.6, 8.0 Hz, 1H), 2.29 (dd, *J* = 13.6, 8.0 Hz, 1H); <sup>13</sup>C NMR (100 MHz, DMSO-*d*<sub>6</sub>)  $\delta$  203.4, 179.2, 148.3, 143.0, 138.6, 136.2, 135.5, 132.4, 129.0, 128.5, 128.1, 127.9,



127.7, 127.4, 125.7, 120.6, 117.5, 109.5, 59.6, 57.0, 54.0, 43.7, 42.7; HRMS (TOF-ESI<sup>+</sup>) m/z: calcd for C<sub>28</sub>H<sub>24</sub>N<sub>2</sub>O<sub>4</sub>Na [M+Na]<sup>+</sup> 475.1628, found 475.1618.

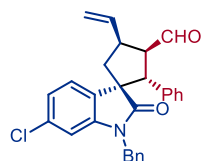

(1*S*,2*R*,3*R*,4*S*)-1'-benzyl-6'-chloro-2'-oxo-2-phenyl-4-vinylspiro[cyclopentane-1,3'-indoline]-3-carbaldehyde (**3ak**): white solid (13% yield, 11.5 mg, 0.026 mmol, 94% ee); m.p. 187-188 °C;  $[\alpha]_{\text{D}}^{25} -71.3^{\circ}$  (c 0.1, CHCl<sub>3</sub>); <sup>1</sup>H NMR (DMSO-*d*<sub>6</sub>, 400 MHz) δ 9.71 (d, *J* = 1.6 Hz, 1H), 7.77 (d, *J* = 7.6 Hz, 1H), 7.25-7.21 (m, 1H), 7.17-7.10 (m, 6H), 6.93 (d, *J* = 7.6 Hz, 2H), 6.58 (s, 1H), 6.53 (d, *J* = 7.2 Hz, 2H), 6.12-6.03 (m, 1H), 5.27 (d, *J* = 16.8 Hz, 1H), 5.13 (d, *J* = 10.4 Hz, 1H), 4.85 (d, *J* = 16.0 Hz, 1H), 4.46 (d, *J* = 16.0 Hz, 1H), 4.30 (t, *J* = 10.8 Hz, 1H), 4.21 (d, *J* = 11.2 Hz, 1H), 3.93-3.84 (m, 1H), 2.40 (dd, *J* = 13.6, 8.0 Hz, 1H), 2.22 (dd, *J* = 13.2, 8.0 Hz, 1H); <sup>13</sup>C NMR (DMSO-*d*<sub>6</sub>, 100 MHz) δ 203.9, 178.3, 144.3, 139.2, 136.6, 135.7, 132.8, 129.9, 128.9, 128.6, 128.2, 127.7, 127.5, 126.8, 125.1, 122.6, 117.1, 109.5, 59.2, 56.7, 52.9, 42.9, 42.6; HRMS (TOF-ESI<sup>+</sup>) m/z: calcd for C<sub>28</sub>H<sub>24</sub>ClNO<sub>2</sub>Na [M+Na]<sup>+</sup> 464.1388, found 464.1392; HPLC analysis: Daicel Chiralpak OD-H (*i*-PrOH: *n*-Hexane = 80:20; flow rate: 1 mL/min; λ = 254 nm; *t*<sub>minor</sub> = 5.7 min, *t*<sub>major</sub> = 8.9 min.

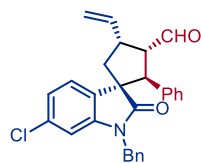

(1*S*,2*S*,3*S*,4*R*)-1'-benzyl-6'-chloro-2'-oxo-2-phenyl-4-vinylspiro[cyclopentane-1,3'-indoline]-3-carbaldehyde (**4ak**, major diastereomer): white solid (53% yield, 46.7 mg, 0.106 mmol, 97% ee); m.p. 194-195 °C;  $[\alpha]_{\text{D}}^{25} +51.7^{\circ}$  (c 0.4, CHCl<sub>3</sub>); <sup>1</sup>H NMR (DMSO-*d*<sub>6</sub>, 400 MHz) δ 9.74 (d, *J* = 2.4 Hz, 1H), 7.67 (d, *J* = 8.0 Hz, 1H), 7.23 (t, *J* = 3.0 Hz, 1H), 7.15-7.12 (m, 1H), 7.07-7.04 (m, 3H), 6.96-6.92 (m, 4H), 6.74 (d, *J* = 1.6 Hz, 1H), 6.55 (d, *J* = 7.2 Hz, 1H), 6.14-6.03 (m, 1H), 5.30 (d, *J* = 16.8 Hz, 2H), 5.15 (d, *J* = 10.0 Hz, 1H), 4.99 (d, *J* = 16.0 Hz, 2H), 4.71 (d, *J* = 16.0 Hz, 1H), 4.22-4.14 (m, 1H), 3.93-3.82 (m, 1H), 3.03 (s, 3H), 2.28 (dd, *J* = 12.8, 8.8 Hz, 1H), 2.17 (dd, *J* = 13.2, 8.0 Hz, 1H); <sup>13</sup>C NMR (DMSO-*d*<sub>6</sub>, 100 MHz) δ 203.7, 178.4, 143.8, 138.6, 136.6, 135.9, 132.8, 130.1, 129.9, 128.9, 128.6, 128.4, 128.3, 127.7, 127.6, 127.3, 126.8, 126.7, 122.1, 117.4, 109.7, 59.5, 57.1, 53.6, 52.9, 43.7, 43.4, 43.2; HRMS (TOF-ESI<sup>+</sup>) m/z: calcd for C<sub>28</sub>H<sub>24</sub>ClNO<sub>2</sub>Na [M+Na]<sup>+</sup> 464.1388, found 464.1396; HPLC analysis: Daicel Chiralpak AD-H (*i*-PrOH: *n*-Hexane = 95:5; flow rate: 1 mL/min; λ = 254 nm; *t*<sub>major</sub> = 15.3 min, *t*<sub>minor</sub> = 16.4 min.

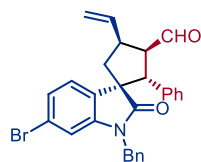

(1*S*,2*R*,3*R*,4*S*)-1'-benzyl-6'-bromo-2'-oxo-2-phenyl-4-vinylspiro[cyclopentane-1,3'-indoline]-3-carbaldehyde (**3al**): white solid (6% yield, 5.8 mg, 0.012 mmol, 93% ee); m.p. 188-189 °C;  $[\alpha]_{\text{D}}^{25} -84.3^{\circ}$  (c 0.05, CHCl<sub>3</sub>); <sup>1</sup>H NMR (DMSO-*d*<sub>6</sub>, 400 MHz) δ 9.71 (d, *J* = 2.0 Hz, 1H), 7.71 (d, *J* = 7.6 Hz, 1H), 7.30 (d, *J* = 8.0 Hz, 1H), 7.21 (t, *J* = 7.0 Hz, 2H), 7.15-7.10 (m, 4H), 6.93 (d, *J* = 8.0 Hz, 2H), 6.70



(s, 1H), 6.53 (d,  $J = 7.2$  Hz, 2H), 6.12-6.03 (m, 1H), 5.27 (d,  $J = 17.2$  Hz, 1H), 5.13 (d,  $J = 10.0$  Hz, 1H), 4.85 (d,  $J = 16.0$  Hz, 1H), 4.46 (d,  $J = 16.0$  Hz, 1H), 4.30 (t,  $J = 10.0$  Hz, 1H), 4.21 (d,  $J = 11.2$  Hz, 1H), 3.93-3.84 (m, 1H), 2.40 (dd,  $J = 13.2, 7.6$  Hz, 1H), 2.21 (dd,  $J = 13.6, 8.4$  Hz, 1H);  $^{13}\text{C}$  NMR (DMSO- $d_6$ , 100 MHz)  $\delta$  203.9, 178.2, 144.5, 139.2, 136.6, 135.7, 130.4, 128.9, 128.6, 128.2, 127.7, 127.5, 126.8, 125.6, 125.5, 121.1, 117.1, 112.1, 59.6, 59.3, 56.7, 52.9, 42.9, 42.6; HRMS (TOF-ESI $^+$ )  $m/z$ : calcd for  $\text{C}_{28}\text{H}_{25}\text{BrNO}_2$   $[\text{M}+\text{H}]^+$  486.1063, found 486.1061; HPLC analysis: Daicel Chiralpak OD-H (*i*-PrOH: *n*-Hexane = 80:20; flow rate: 1 mL/min;  $\lambda = 254$  nm;  $t_{\text{minor}} = 5.8$  min,  $t_{\text{major}} = 9.8$  min.

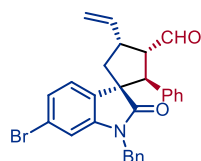

(1S,2S,3S,4R)-1'-benzyl-6'-bromo-2'-oxo-2-phenyl-4-vinylspiro[cyclopentane-1,3'-indoline]-3-carbaldehyde (**4al**, major diastereomer): white solid (34% yield, 33.0 mg, 0.068 mmol, 94% ee); m.p. 191-192 °C;  $[\alpha]_{\text{D}}^{25} -27.2^\circ$  (c 0.3,  $\text{CHCl}_3$ );  $^1\text{H}$  NMR (DMSO- $d_6$ , 400 MHz)  $\delta$  9.74 (d,  $J = 2.4$  Hz, 1H), 7.62 (d,  $J = 8.0$  Hz, 1H), 7.23 (t,  $J = 3.0$  Hz, 3H), 7.14 (t,  $J = 7.6$  Hz, 2H), 7.06 (d,  $J = 7.6$  Hz, 2H), 6.96-6.86 (m, 4H), 6.55 (d,  $J = 7.2$  Hz, 1H), 6.12-6.03 (m, 1H), 5.30 (d,  $J = 16.8$  Hz, 1H), 5.16 (d,  $J = 10.0$  Hz, 1H), 4.98 (d,  $J = 16.4$  Hz, 1H), 4.71 (d,  $J = 16.0$  Hz, 1H), 4.25-4.15 (m, 2H), 3.93-3.83 (m, 1H), 2.27 (dd,  $J = 18.8, 12.8$  Hz, 1H), 2.16 (dd,  $J = 12.8, 7.6$  Hz, 1H);  $^{13}\text{C}$  NMR (DMSO- $d_6$ , 100 MHz)  $\delta$  203.7, 178.3, 143.9, 138.6, 136.6, 135.9, 135.7, 130.5, 130.4, 129.0, 128.6, 128.4, 128.3, 127.7, 127.6, 127.3, 127.1, 126.8, 125.1, 121.1, 117.4, 112.4, 59.5, 57.1, 53.5, 43.7, 43.2, 42.6; HRMS (TOF-ESI $^+$ )  $m/z$ : calcd for  $\text{C}_{28}\text{H}_{24}\text{BrNO}_2\text{Na}$   $[\text{M}+\text{Na}]^+$  508.0883, found 508.0885; HPLC analysis: Daicel Chiralpak AD-H (*i*-PrOH: *n*-Hexane = 95:5; flow rate: 1 mL/min;  $\lambda = 254$  nm;  $t_{\text{minor}} = 23.3$  min,  $t_{\text{major}} = 24.9$  min.

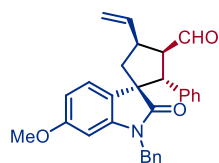

(1S,2R,3R,4S)-1'-benzyl-6'-methoxyl-2'-oxo-2-phenyl-4-vinylspiro[cyclopentane-1,3'-indoline]-3-carbaldehyde (**3am**): white solid (26% yield, 22.7 mg, 0.052 mmol, 96% ee); m.p. 135-136 °C;  $[\alpha]_{\text{D}}^{25} -116.2^\circ$  (c 0.2,  $\text{CHCl}_3$ );  $^1\text{H}$  NMR (DMSO- $d_6$ , 400 MHz)  $\delta$  9.73 (d,  $J = 2.0$  Hz, 1H), 7.62 (d,  $J = 8.4$  Hz, 1H), 7.21 (t,  $J = 7.4$  Hz, 1H), 7.15-7.09 (m, 6H), 6.95 (d,  $J = 7.2$  Hz, 2H), 6.67 (dd,  $J = 8.0, 2.0$  Hz, 1H), 6.57 (d,  $J = 7.2$  Hz, 2H), 6.11-6.07 (m, 1H), 5.28 (d,  $J = 16.8$  Hz, 1H), 5.14 (d,  $J = 10.0$  Hz, 1H), 4.85 (d,  $J = 16.0$  Hz, 1H), 4.43 (d,  $J = 16.4$  Hz, 1H), 4.32-4.26 (m, 1H), 4.17 (d,  $J = 11.6$  Hz, 1H), 3.90 (dd,  $J = 17.6, 8.4$  Hz, 1H), 3.65 (s, 3H), 2.36 (dd,  $J = 13.2, 7.6$  Hz, 1H), 2.19 (dd,  $J = 13.2, 8.4$  Hz, 1H);  $^{13}\text{C}$  NMR (DMSO- $d_6$ , 100 MHz)  $\delta$  204.1, 178.8, 159.9, 144.0, 139.3, 136.9, 136.1, 128.8, 128.5, 128.3, 127.5, 127.4, 126.9, 124.1, 122.6, 118.2, 116.9, 106.8, 97.2, 59.1, 56.8, 55.7, 52.9, 43.0, 42.8, 42.6; HRMS (TOF-ESI $^+$ )  $m/z$ : calcd for  $\text{C}_{29}\text{H}_{27}\text{NO}_3\text{Na}$   $[\text{M}+\text{Na}]^+$  460.1883,

found 460.1872; HPLC analysis: Daicel Chiralpak OD-H (*i*-PrOH: *n*-Hexane = 80:20; flow rate: 1 mL/min;  $\lambda$  = 254 nm;  $t_{\text{minor}}$  = 6.4 min,  $t_{\text{major}}$  = 8.7 min.

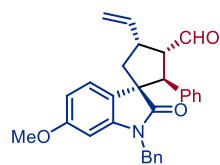

(1*S*,2*S*,3*S*,4*R*)-1'-benzyl-6'-methoxyl-2'-oxo-2-phenyl-4-vinylspiro[cyclopentane-1,3'-indoline]-3-carbaldehyde (**4am**): white solid (37% yield, 32.3 mg, 0.074 mmol, 98% ee); m.p. 138-139 °C;  $[\alpha]_{\text{D}}^{25}$  +41.8° (c 0.3, CHCl<sub>3</sub>); <sup>1</sup>H NMR (DMSO-*d*<sub>6</sub>, 400 MHz)  $\delta$  9.74 (d, *J* = 2.4 Hz, 1H), 7.56 (d, *J* = 8.4 Hz, 1H), 7.21-7.19 (m, 3H), 7.08-7.03 (m, 3H), 6.94-6.90 (m, 4H), 6.54 (dd, *J* = 8.4, 2.0 Hz, 1H), 6.22 (d, *J* = 2.0 Hz, 1H), 6.11-6.02 (m, 1H), 5.30 (d, *J* = 16.8 Hz, 1H), 5.15 (d, *J* = 10.0 Hz, 1H), 4.97 (d, *J* = 16.0 Hz, 1H), 4.67 (d, *J* = 16.0 Hz, 1H), 4.21-4.09 (m, 2H), 3.89-3.80 (m, 1H), 3.63 (s, 3H), 2.27 (dd, *J* = 12.8, 9.2 Hz, 1H), 2.08 (dd, *J* = 12.8, 7.6 Hz, 1H); <sup>13</sup>C NMR (DMSO-*d*<sub>6</sub>, 100 MHz)  $\delta$  204.0, 178.7, 159.7, 143.5, 138.8, 137.0, 136.3, 128.9, 128.4, 128.3, 127.6, 127.4, 127.3, 125.9, 122.9, 117.3, 106.4, 97.3, 59.3, 57.3, 55.6 (d, *J* = 5.0 Hz), 53.4, 43.8, 43.7, 43.1; HRMS (TOF-ESI<sup>+</sup>) *m/z*: calcd for C<sub>29</sub>H<sub>27</sub>NO<sub>3</sub>Na [M+Na]<sup>+</sup> 460.1883, found 460.1884; HPLC analysis: Daicel Chiralpak AD-H (*i*-PrOH: *n*-Hexane = 90:10; flow rate: 1 mL/min;  $\lambda$  = 254 nm;  $t_{\text{major}}$  = 20.5 min,  $t_{\text{minor}}$  = 23.2 min.

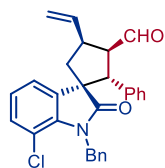

(1*S*,2*R*,3*R*,4*S*)-1'-benzyl-7'-chloro-2'-oxo-2-phenyl-4-vinylspiro[cyclopentane-1,3'-indoline]-3-carbaldehyde (**3an**): white solid (29% yield, 25.6 mg, 0.058 mmol, 94% ee); m.p. 153-154 °C;  $[\alpha]_{\text{D}}^{25}$  -72.5° (c 0.25, CHCl<sub>3</sub>); <sup>1</sup>H NMR (DMSO-*d*<sub>6</sub>, 400 MHz)  $\delta$  9.73 (d, *J* = 2.4 Hz, 1H), 7.80 (dd, *J* = 6.0, 3.2 Hz, 1H), 7.26 (t, *J* = 7.2 Hz, 1H), 7.19-7.13 (m, 5H), 7.09-7.05 (m, 2H), 6.94 (d, *J* = 7.6 Hz, 2H), 6.37 (d, *J* = 7.2 Hz, 2H), 6.15-6.06 (m, 1H), 5.29 (d, *J* = 17.2 Hz, 1H), 5.15 (d, *J* = 11.2 Hz, 1H), 5.06 (d, *J* = 17.2 Hz, 1H), 4.90 (d, *J* = 17.2 Hz, 1H), 4.36-4.25 (m, 2H), 3.94-3.85 (m, 1H), 2.46 (dd, *J* = 13.2, 7.6 Hz, 1H), 2.24 (dd, *J* = 13.6, 8.4 Hz, 1H); <sup>13</sup>C NMR (DMSO-*d*<sub>6</sub>, 100 MHz)  $\delta$  203.8, 178.7, 139.2, 138.8, 137.8, 136.5, 134.3, 130.7, 128.8, 128.7, 128.2, 127.9, 126.9, 125.6, 124.4, 122.8, 117.1, 114.1, 59.3, 56.5, 53.2, 44.2, 43.3, 42.8; HRMS (TOF-ESI<sup>+</sup>) *m/z*: calcd for C<sub>28</sub>H<sub>24</sub>ClNO<sub>2</sub>Na [M+Na]<sup>+</sup> 464.1388, found 464.1393; HPLC analysis: Daicel Chiralpak OD-H (*i*-PrOH: *n*-Hexane = 80:20; flow rate: 1 mL/min;  $\lambda$  = 254 nm;  $t_{\text{minor}}$  = 5.4 min,  $t_{\text{major}}$  = 11.7 min.

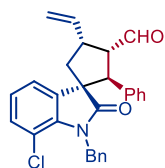

(1*S*,2*S*,3*S*,4*R*)-1'-benzyl-7'-chloro-2'-oxo-2-phenyl-4-vinylspiro[cyclopentane-1,3'-indoline]-3-carbaldehyde (**4an**): white solid (60% yield, 52.9 mg, 0.12 mmol, 80% ee); m.p. 132-133 °C;  $[\alpha]_{\text{D}}^{25}$  -19.1° (c 0.5, CHCl<sub>3</sub>); <sup>1</sup>H NMR (DMSO-*d*<sub>6</sub>, 400 MHz)  $\delta$  9.74 (d, *J* = 2.4 Hz, 1H), 7.71 (d, *J* = 6.8 Hz, 1H), 7.19-7.17 (m, 3H), 7.15-7.13 (m, 1H), 7.12-7.05 (m, 4H), 6.94 (d, *J* = 6.8 Hz, 2H), 6.75-6.73 (m, 2H), 6.12-6.03 (m,

1H), 5.31 (d,  $J = 16.8$  Hz, 1H), 5.20-5.13 (m, 3H), 4.28-4.17 (m, 2H), 3.94-3.85 (m, 2H), 2.34-2.21 (m, 2H);  $^{13}\text{C}$  NMR (DMSO- $d_6$ , 100 MHz)  $\delta$  203.6, 179.0, 138.6, 138.3, 137.8, 136.5, 134.5, 130.7, 128.8, 128.5, 127.7, 127.2, 126.0, 124.5, 124.0, 117.4, 114.4, 59.5, 57.4, 54.1, 44.9, 43.9, 43.8; HRMS (TOF-ESI $^+$ )  $m/z$ : calcd for  $\text{C}_{28}\text{H}_{24}\text{ClNO}_2\text{Na}$   $[\text{M}+\text{Na}]^+$  464.1388, found 464.1394; HPLC analysis: Daicel Chiralpak AD-H (*i*-PrOH: *n*-Hexane = 90:10; flow rate: 1 mL/min;  $\lambda = 254$  nm;  $t_{\text{major}} = 14.8$  min,  $t_{\text{minor}} = 21.9$  min.

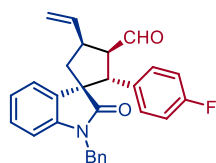

(1*S*,2*R*,3*R*,4*S*)-1'-benzyl-2'-oxo-2-(4-fluorophenyl)-4-vinylspiro[cyclopentane-1,3'-indoline]-3-carbaldehyde (**3ao**): white solid (38% yield, 32.3 mg, 0.076 mmol, 87% ee); m.p. 135-136 °C;  $[\alpha]_{\text{D}}^{25} -103.2^\circ$  (c 0.3,  $\text{CHCl}_3$ );  $^1\text{H}$  NMR (DMSO- $d_6$ , 400 MHz)  $\delta$  9.73 (d,  $J = 2.0$  Hz, 1H), 7.73 (t,  $J = 4.2$  Hz, 1H), 7.18-7.09 (m, 5H), 6.94 (d,  $J = 7.6$  Hz, 4H), 6.60-6.53 (m, 3H), 6.15-6.06 (m, 1H), 5.30 (d,  $J = 16.8$  Hz, 1H), 5.15 (d,  $J = 10.0$  Hz, 1H), 4.89 (d,  $J = 16.0$  Hz, 1H), 4.45 (d,  $J = 16.4$  Hz, 1H), 4.31 (t,  $J = 10.8$  Hz, 1H), 4.20 (d,  $J = 11.6$  Hz, 1H), 3.95-3.86 (m, 1H), 2.42 (dd,  $J = 13.6, 8.0$  Hz, 1H), 2.22 (dd,  $J = 13.6, 8.4$  Hz, 1H);  $^{13}\text{C}$  NMR (DMSO- $d_6$ , 100 MHz)  $\delta$  203.9, 178.2, 161.9 (d,  $J_{\text{C-F}} = 241.0$  Hz), 142.8, 139.3, 136.1, 133.0, 130.8, 130.0 (d,  $J_{\text{C-F}} = 8.0$  Hz), 128.6, 127.5, 126.9, 123.5, 123.1, 117.1, 115.2 (d,  $J_{\text{C-F}} = 21.0$  Hz), 109.3, 59.4, 56.9, 52.2, 42.8, 42.6; HRMS (TOF-ESI $^+$ )  $m/z$ : calcd for  $\text{C}_{28}\text{H}_{24}\text{FNO}_2\text{Na}$   $[\text{M}+\text{Na}]^+$  448.1683, found 448.1668; HPLC analysis: Daicel Chiralpak OD-H (*i*-PrOH: *n*-Hexane = 70:30; flow rate: 0.8 mL/min;  $\lambda = 254$  nm;  $t_{\text{minor}} = 21.3$  min,  $t_{\text{major}} = 24.5$  min.

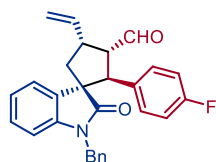

(1*S*,2*S*,3*S*,4*R*)-1'-benzyl-2'-oxo-2-(4-fluorophenyl)-4-vinylspiro[cyclopentane-1,3'-indoline]-3-carbaldehyde (**4ao**): white solid (50% yield, 42.5 mg, 0.10 mmol, 73% ee); m.p. 137-138 °C;  $[\alpha]_{\text{D}}^{25} +15.7^\circ$  (c 0.4,  $\text{CHCl}_3$ );  $^1\text{H}$  NMR (DMSO- $d_6$ , 400 MHz)  $\delta$  9.74 (s, 1H), 7.67 (d,  $J = 7.2$  Hz, 1H), 7.21-7.20 (m, 3H), 7.11 (t,  $J = 7.2$  Hz, 1H), 7.03 (t,  $J = 7.2$  Hz, 1H), 6.93-6.83 (m, 6H), 6.65 (d,  $J = 7.6$  Hz, 1H), 6.11-6.02 (m, 1H), 5.32 (d,  $J = 16.8$  Hz, 1H), 5.16 (d,  $J = 10.0$  Hz, 1H), 4.99 (d,  $J = 16.0$  Hz, 1H), 4.67 (d,  $J = 16.0$  Hz, 1H), 4.22-4.12 (m, 2H), 3.93-3.87 (m, 1H), 2.26-2.31 (m, 1H), 2.16 (dd,  $J = 12.4, 7.6$  Hz, 1H);  $^{13}\text{C}$  NMR (DMSO- $d_6$ , 100 MHz)  $\delta$  203.7, 178.1, 161.6 (d,  $J_{\text{C-F}} = 241.0$  Hz), 142.2, 138.8, 136.3, 133.0, 130.2 (d,  $J_{\text{C-F}} = 8.0$  Hz), 128.8, 128.5, 127.7, 127.3, 125.2, 122.7, 117.4, 115.0 (d,  $J_{\text{C-F}} = 21.0$  Hz), 109.5, 59.6, 57.4, 53.0, 43.6, 43.2; HRMS (TOF-ESI $^+$ )  $m/z$ : calcd for  $\text{C}_{28}\text{H}_{24}\text{FNO}_2\text{Na}$   $[\text{M}+\text{Na}]^+$  448.1683, found 448.1663; HPLC analysis: Daicel Chiralpak AD-H (*i*-PrOH: *n*-Hexane = 70:30; flow rate: 0.8 mL/min;  $\lambda = 254$  nm;  $t_{\text{major}} = 16.2$  min,  $t_{\text{minor}} = 17.2$  min.

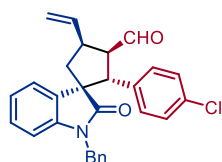

(1*S*,2*R*,3*R*,4*S*)-1'-benzyl-2'-oxo-2-(4-chlorophenyl)-4-vinylspiro[cyclopentane-1,3'-indoline]-3-carbaldehyde (**3ap**): white solid (47% yield, 41.5 mg, 0.094 mmol, 84% ee); m.p. 135-136 °C;  $[\alpha]_{\text{D}}^{25}$   $-111.4^{\circ}$  (c 0.4, CHCl<sub>3</sub>); <sup>1</sup>H NMR (DMSO-*d*<sub>6</sub>, 400 MHz)  $\delta$  9.73 (d, *J* = 1.6 Hz, 1H), 7.75-7.73 (m, 1H), 7.19-7.13 (m, 7H), 6.92 (d, *J* = 8.4 Hz, 2H), 6.59-6.53 (m, 3H), 6.14-6.05 (m, 1H), 5.30 (d, *J* = 17.2 Hz, 1H), 5.15 (d, *J* = 10.0 Hz, 1H), 4.92 (d, *J* = 16.0 Hz, 1H), 4.44 (d, *J* = 16.0 Hz, 1H), 4.33 (t, *J* = 11.0 Hz, 1H), 4.19 (d, *J* = 11.6 Hz, 1H), 3.95-3.87 (m, 1H), 2.43 (dd, *J* = 13.6, 8.0 Hz, 1H), 2.21 (dd, *J* = 13.2, 8.0 Hz, 1H); <sup>13</sup>C NMR (DMSO-*d*<sub>6</sub>, 100 MHz)  $\delta$  203.7, 178.1, 142.8, 139.3, 136.1, 136.0, 132.3, 130.7, 130.0, 128.7, 128.5, 127.5, 126.9, 123.5, 123.1, 117.1, 109.3, 59.3, 56.7, 52.2, 42.7, 42.6; HRMS (TOF-ESI<sup>+</sup>) *m/z*: calcd for C<sub>28</sub>H<sub>24</sub>ClNO<sub>2</sub>Na [M+Na]<sup>+</sup> 464.1388, found 464.1390; HPLC analysis: Daicel Chiralpak OD-H (*i*-PrOH: *n*-Hexane = 70:30; flow rate: 0.8 mL/min;  $\lambda$  = 254 nm; *t*<sub>minor</sub> = 23.1 min, *t*<sub>major</sub> = 25.6 min.

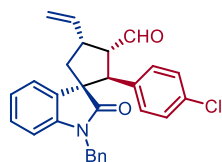

(1*S*,2*S*,3*S*,4*R*)-1'-benzyl-2'-oxo-2-(4-chlorophenyl)-4-vinylspiro[cyclopentane-1,3'-indoline]-3-carbaldehyde (**4ap**): white solid (43% yield, 37.9 mg, 0.086 mmol, 83% ee); m.p. 134-135 °C;  $[\alpha]_{\text{D}}^{25}$   $+8.3^{\circ}$  (c 0.3, CHCl<sub>3</sub>); <sup>1</sup>H NMR (DMSO-*d*<sub>6</sub>, 400 MHz)  $\delta$  9.74 (s, 1H), 7.68 (d, *J* = 7.2 Hz, 1H), 7.22-7.20 (m, 3H), 7.13-7.02 (m, 4H), 6.92-6.88 (m, 4H), 6.65 (d, *J* = 7.6 Hz, 1H), 6.10-6.01 (m, 1H), 5.32 (d, *J* = 16.8 Hz, 1H), 5.13 (d, *J* = 10.0 Hz, 1H), 5.01 (d, *J* = 16.0 Hz, 1H), 4.66 (d, *J* = 16.0 Hz, 1H), 4.17 (d, *J* = 4.0 Hz, 2H), 3.90 (s, 1H), 2.31-2.25 (m, 1H), 2.17 (dd, *J* = 12.8, 8.0 Hz, 1H); <sup>13</sup>C NMR (DMSO-*d*<sub>6</sub>, 100 MHz)  $\delta$  203.6, 178.0, 142.2, 138.8, 136.2, 135.9, 132.1, 130.8, 130.1, 128.8, 128.6, 128.3, 127.7, 127.3, 125.2, 122.7, 117.4, 109.6, 59.6, 57.2, 53.0, 43.6, 43.2; HRMS (TOF-ESI<sup>+</sup>) *m/z*: calcd for C<sub>28</sub>H<sub>24</sub>ClNO<sub>2</sub>Na [M+Na]<sup>+</sup> 464.1388, found 464.1393; HPLC analysis: Daicel Chiralpak OD-H (*i*-PrOH: *n*-Hexane = 70:30; flow rate: 0.8 mL/min;  $\lambda$  = 254 nm; *t*<sub>minor</sub> = 23.7 min, *t*<sub>major</sub> = 25.0 min.

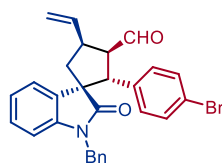

(1*S*,2*R*,3*R*,4*S*)-1'-benzyl-2'-oxo-2-(4-bromophenyl)-4-vinylspiro[cyclopentane-1,3'-indoline]-3-carbaldehyde (**3aq**, major diastereomer): white solid (29% yield, 28.1 mg, 0.058 mmol, 88% ee); m.p. 149-150 °C;  $[\alpha]_{\text{D}}^{25}$   $-124.6^{\circ}$  (c 0.2, CHCl<sub>3</sub>); <sup>1</sup>H NMR (DMSO-*d*<sub>6</sub>, 400 MHz)  $\delta$  9.73 (d, *J* = 2.0 Hz, 1H), 7.74-7.72 (m, 1H), 7.30 (d, *J* = 8.4 Hz, 2H), 7.18-7.12 (m, 5H), 6.87 (d, *J* = 8.4 Hz, 2H), 6.59-6.52 (m, 3H), 6.14-6.05 (m, 1H), 5.29 (d, *J* = 17.2 Hz, 1H), 5.17-5.14 (m, 1H), 4.93 (d, *J* = 16.0 Hz, 1H), 4.43 (d, *J* = 16.0 Hz, 1H), 4.34 (t, *J* = 10.0 Hz, 1H), 4.19 (d, *J* = 11.6 Hz, 1H), 3.92 (t, *J* = 9.4 Hz, 1H), 2.43 (dd, *J* = 13.6, 8.0 Hz, 1H), 2.21 (dd, *J* = 13.6, 8.0 Hz, 1H); <sup>13</sup>C NMR (DMSO-*d*<sub>6</sub>, 100 MHz)  $\delta$  203.7, 178.1, 142.8, 139.3, 136.4, 136.1, 131.4, 130.7, 130.4, 128.7(3), 128.6(6), 127.4, 126.9, 123.5, 123.1, 120.9, 117.1, 109.3, 59.2, 56.7, 52.3, 42.7; HRMS (TOF-ESI<sup>+</sup>) *m/z*:

calcd for C<sub>28</sub>H<sub>24</sub>BrNO<sub>2</sub>Na [M+Na]<sup>+</sup> 508.0883, found 508.887; HPLC analysis: Daicel Chiralpak OD-H (*i*-PrOH: *n*-Hexane = 70:30; flow rate: 0.8 mL/min; λ = 254 nm; *t*<sub>minor</sub> = 24.0 min, *t*<sub>major</sub> = 26.8 min.

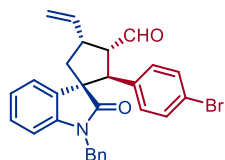

(1*S*,2*S*,3*S*,4*R*)-1'-benzyl-2'-oxo-2-(4-bromophenyl)-4-vinylspiro[cyclopentane-1,3'-indoline]-3-carbaldehyde (**4aq**): white solid (46% yield, 44.6 mg, 0.092 mmol, 80% ee); m.p. 163-164 °C; [α]<sub>D</sub><sup>25</sup> +11.8° (c 0.4, CHCl<sub>3</sub>); <sup>1</sup>H NMR (DMSO-*d*<sub>6</sub>, 400 MHz) δ 9.74 (s, 1H), 7.68 (d, *J* = 7.2 Hz, 1H), 7.21-7.22 (m, 5H), 7.12 (t, *J* = 7.6 Hz, 1H), 7.04 (t, *J* = 7.2 Hz, 1H), 6.89-6.84 (m, 4H), 6.64 (d, *J* = 7.6 Hz, 1H), 6.09-6.00 (m, 1H), 5.32 (d, *J* = 16.8 Hz, 1H), 5.16 (d, *J* = 10.0 Hz, 1H), 5.02 (d, *J* = 16.0 Hz, 1H), 4.66 (d, *J* = 16.0 Hz, 1H), 4.20-4.16 (m, 2H), 3.92-3.88 (m, 1H), 2.27 (dd, *J* = 12.8, 9.2 Hz, 1H), 2.15 (dd, *J* = 12.8, 8.0 Hz, 1H); <sup>13</sup>C NMR (DMSO-*d*<sub>6</sub>, 100 MHz) δ 203.6, 177.9, 142.2, 138.8, 136.3, 136.2, 131.2, 130.8, 130.5, 128.8, 128.6, 127.6, 127.2, 125.2, 122.7, 120.7, 117.4, 109.6, 59.5, 57.2, 53.1, 43.5, 43.2; HRMS (TOF-ESI<sup>+</sup>) *m/z*: calcd for C<sub>28</sub>H<sub>24</sub>BrNO<sub>2</sub>Na [M+Na]<sup>+</sup> 508.0883, found 508.888; HPLC analysis: Daicel Chiralpak OD-H (*i*-PrOH: *n*-Hexane = 70:30; flow rate: 0.8 mL/min; λ = 254 nm; *t*<sub>minor</sub> = 24.3 min, *t*<sub>major</sub> = 26.2 min.

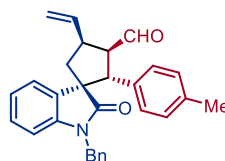

(1*S*,2*R*,3*R*,4*S*)-1'-benzyl-2'-oxo-2-(4-methylphenyl)-4-vinylspiro[cyclopentane-1,3'-indoline]-3-carbaldehyde (**3ar**): white solid (37% yield, 31.2 mg, 0.074 mmol, 89% ee); m.p. 121-122 °C; [α]<sub>D</sub><sup>25</sup> -95.6° (c 0.3, CHCl<sub>3</sub>); <sup>1</sup>H NMR (DMSO-*d*<sub>6</sub>, 400 MHz) δ 9.72-9.73 (m, 1H), 7.72-7.70 (m, 1H), 7.17-7.07 (m, 5H), 6.91 (d, *J* = 8.0 Hz, 2H), 6.81 (d, *J* = 7.6 Hz, 2H), 6.60 (d, *J* = 7.2 Hz, 2H), 6.51-6.49 (m, 1H), 6.15-6.06 (m, 1H), 5.28 (d, *J* = 16.8 Hz, 1H), 5.15 (d, *J* = 10.0 Hz, 1H), 4.90 (d, *J* = 16.4 Hz, 1H), 4.44 (d, *J* = 16.4 Hz, 1H), 4.30-4.24 (m, 1H), 4.17 (d, *J* = 11.6 Hz, 1H), 3.94-3.85 (m, 1H), 2.40 (dd, *J* = 13.6, 8.0 Hz, 1H), 2.27-2.20 (m, 4H); <sup>13</sup>C NMR (DMSO-*d*<sub>6</sub>, 100 MHz) δ 204.1, 178.3, 142.9, 139.3, 136.6, 136.1, 133.7, 131.0, 129.1, 128.7, 128.5, 128.1, 127.4, 126.9, 123.4, 122.9, 116.9, 109.2, 59.4, 57.0, 52.8, 43.0, 42.8, 42.7, 21.1; HRMS (TOF-ESI<sup>+</sup>) *m/z*: calcd for C<sub>29</sub>H<sub>27</sub>NO<sub>2</sub>Na [M+Na]<sup>+</sup> 444.1934, found 444.1937; HPLC analysis: Daicel Chiralpak AD-H (*i*-PrOH: *n*-Hexane = 70:30; flow rate: 0.8 mL/min; λ = 254 nm; *t*<sub>major</sub> = 97.4 min, *t*<sub>minor</sub> = 7.9 min.

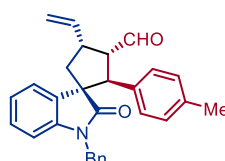

(1*S*,2*S*,3*S*,4*R*)-1'-benzyl-2'-oxo-2-(4-methylphenyl)-4-vinylspiro[cyclopentane-1,3'-indoline]-3-carbaldehyde (**4ar**): white solid (53% yield, 44.6 mg, 0.106 mmol, 84% ee); m.p. 139-140 °C; [α]<sub>D</sub><sup>25</sup> +28.6° (c 0.4, CHCl<sub>3</sub>); <sup>1</sup>H NMR (DMSO-*d*<sub>6</sub>, 400 MHz) δ 9.73 (d, *J* = 2.4 Hz, 1H), 7.66 (d, *J* = 7.2 Hz,

1H), 7.21-7.17 (m, 3H), 7.09 (t,  $J = 7.2$  Hz, 1H), 7.02 (t,  $J = 7.0$  Hz, 1H), 6.89 (d,  $J = 6.8$  Hz, 2H), 6.82 (dd,  $J = 13.2, 8.0$  Hz, 3H), 6.60 (d,  $J = 7.6$  Hz, 1H), 6.12-6.03 (m, 1H), 5.30 (d,  $J = 16.8$  Hz, 1H), 5.15 (d,  $J = 10.0$  Hz, 1H), 5.00 (d,  $J = 16.0$  Hz, 1H), 4.66 (d,  $J = 16.0$  Hz, 1H), 4.11 (dt,  $J = 10.8, 2.4$  Hz, 2H), 3.91-3.82 (m, 1H), 2.32-2.23 (m, 2H), 2.15 (s, 3H);  $^{13}\text{C}$  NMR (DMSO- $d_6$ , 100 MHz)  $\delta$  203.9, 178.2, 142.2, 138.8, 136.4, 136.2, 133.7, 131.2, 128.9, 128.8, 128.4, 128.3, 127.6, 127.2, 125.2, 122.6, 117.3, 109.5, 59.7, 57.5, 53.4, 43.7, 43.5, 43.2, 21.0; HRMS (TOF-ESI $^+$ )  $m/z$ : calcd for  $\text{C}_{29}\text{H}_{27}\text{NO}_2\text{Na}$   $[\text{M}+\text{Na}]^+$  444.1934, found 444.1927; HPLC analysis: Daicel Chiralpak OD-H (*i*-PrOH: *n*-Hexane = 90:10; flow rate: 1 mL/min;  $\lambda = 254$  nm;  $t_{\text{major}} = 7.8$  min,  $t_{\text{minor}} = 10.5$  min.

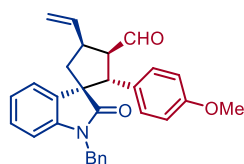

(1*S*,2*R*,3*R*,4*S*)-1'-benzyl-2'-oxo-2-(4-methoxyphenyl)-4-vinylspiro[cyclopentane-1,3'-indoline]-3-carbaldehyde (**3as**, major diastereomer): white solid (44% yield, 38.5 mg, 0.088 mmol, 98% ee); m.p. 97-98 °C;  $[\alpha]_{\text{D}}^{25} -147.6^\circ$  (c 0.3,  $\text{CHCl}_3$ );  $^1\text{H}$  NMR (DMSO- $d_6$ , 400 MHz)  $\delta$  9.72 (d,  $J = 2.0$  Hz, 1H),

7.72-7.69 (m, 1H), 7.14-7.07 (m, 6H), 6.84 (d,  $J = 8.8$  Hz, 2H), 6.72-6.66 (m, 2H), 6.56 (d,  $J = 7.2$  Hz, 1H), 6.51-6.49 (m, 1H), 6.16-6.01 (m, 1H), 5.27 (d,  $J = 16.8$  Hz, 1H), 5.14 (d,  $J = 10.0$  Hz, 1H), 4.92 (d,  $J = 16.0$  Hz, 1H), 4.43 (d,  $J = 16.4$  Hz, 1H), 4.23-4.16 (m, 1H), 3.98-3.84 (m, 1H), 3.68 (s, 3H), 2.40 (dd,  $J = 13.6, 7.6$  Hz, 1H), 2.22 (dd,  $J = 13.2, 8.0$  Hz, 1H);  $^{13}\text{C}$  NMR (DMSO- $d_6$ , 100 MHz)  $\delta$  204.2, 178.3, 158.9, 142.8, 141.8, 139.3, 136.1, 131.1, 129.3, 128.6, 128.5, 127.4, 126.9, 123.4, 122.9, 116.9, 113.8, 109.2, 59.5, 57.0, 55.4, 52.5, 43.0, 42.6; HRMS (TOF-ESI $^+$ )  $m/z$ : calcd for  $\text{C}_{29}\text{H}_{27}\text{NO}_3\text{Na}$   $[\text{M}+\text{Na}]^+$  460.1883, found 460.1877; HPLC analysis: Daicel Chiralpak OD-H (*i*-PrOH: *n*-Hexane = 80:20; flow rate: 1 mL/min;  $\lambda = 254$  nm;  $t_{\text{minor}} = 6.4$  min,  $t_{\text{major}} = 8.7$  min.

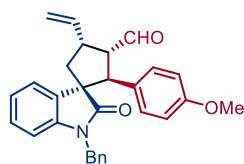

(1*S*,2*S*,3*S*,4*R*)-1'-benzyl-2'-oxo-2-(4-methoxyphenyl)-4-vinylspiro[cyclopentane-1,3'-indoline]-3-carbaldehyde (**4as**): white solid (40% yield, 35.0 mg, 0.08 mmol, 85% ee); m.p. 98-99 °C;  $[\alpha]_{\text{D}}^{25} -40.0^\circ$  (c 0.3,  $\text{CHCl}_3$ );  $^1\text{H}$  NMR (DMSO- $d_6$ , 400 MHz)  $\delta$  9.73 (d,  $J = 2.4$  Hz, 1H), 7.66 (d,  $J = 7.2$  Hz,

1H), 7.21-7.17 (m, 3H), 7.09 (d,  $J = 7.6$  Hz, 1H), 7.04 (d,  $J = 7.2$  Hz, 1H), 6.88 (d,  $J = 7.2$  Hz, 2H), 6.82 (d,  $J = 8.4$  Hz, 2H), 6.63-6.57 (m, 3H), 6.12-6.03 (m, 1H), 5.30 (d,  $J = 16.8$  Hz, 1H), 5.15 (d,  $J = 10.0$  Hz, 1H), 5.01 (d,  $J = 16.0$  Hz, 1H), 4.65 (d,  $J = 16.0$  Hz, 1H), 4.18 (d,  $J = 12.0$  Hz, 1H), 4.09-4.03 (m, 1H), 3.86 (t,  $J = 9.2$  Hz, 1H), 3.62 (s, 3H), 2.28 (dd,  $J = 13.2, 9.2$  Hz, 1H), 2.13 (dd,  $J = 13.2, 8.0$  Hz, 1H);  $^{13}\text{C}$  NMR (DMSO- $d_6$ , 100 MHz)  $\delta$  204.0, 178.2, 158.6, 142.2, 138.8, 136.2, 131.2, 129.4, 128.8, 128.5, 128.4, 127.6, 127.2, 125.2, 122.6, 117.3, 113.6, 109.5, 59.8, 57.6,

55.3(4), 55.2(9), 53.2, 43.7, 43.1; HRMS (TOF-ESI<sup>+</sup>) *m/z*: calcd for C<sub>29</sub>H<sub>27</sub>NO<sub>3</sub>Na [M+Na]<sup>+</sup> 460.1883, found 460.1872; HPLC analysis: Daicel Chiralpak AD-H (*i*-PrOH: *n*-Hexane = 80:20; flow rate: 1 mL/min; λ = 254 nm; *t*<sub>major</sub> = 12.1 min, *t*<sub>minor</sub> = 18.0 min.

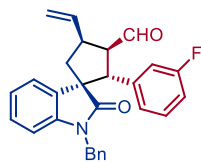

(1*S*,2*R*,3*R*,4*S*)-1'-benzyl-2'-oxo-2-(3-fluorophenyl)-4-vinylspiro[cyclopentane-1,3'-indoline]-3-carbaldehyde (**3at**): white solid (32% yield, 27.2 mg, 0.064 mmol, 98% ee); m.p. 128-129 °C; [α]<sub>D</sub><sup>25</sup> −83.6° (c 0.2, CHCl<sub>3</sub>); <sup>1</sup>H NMR (DMSO-*d*<sub>6</sub>, 400 MHz) δ 9.74 (s, 1H), 7.74-7.75 (m, 1H), 7.18-7.14 (m, 6H), 7.04 (t, *J* = 8.0 Hz, 1H), 6.74-6.71 (m, 2H), 6.60 (d, *J* = 6.8 Hz, 2H), 6.56-6.55 (m, 1H), 6.13-6.04 (m, 1H), 5.30 (d, *J* = 16.8 Hz, 1H), 5.15 (d, *J* = 10.0 Hz, 1H), 4.90 (d, *J* = 16.0 Hz, 1H), 4.45 (d, *J* = 16.0 Hz, 1H), 4.36 (t, *J* = 10.8 Hz, 1H), 4.22 (d, *J* = 11.2 Hz, 1H), 3.96-3.89 (m, 1H), 2.42 (dd, *J* = 13.6, 8.0 Hz, 1H), 2.21 (dd, *J* = 13.2, 8.4 Hz, 1H); <sup>13</sup>C NMR (DMSO-*d*<sub>6</sub>, 100 MHz) δ 203.7, 178.1, 161.2 (d, *J*<sub>C-F</sub> = 242.0 Hz), 142.8, 139.9 (d, *J*<sub>C-F</sub> = 7.0 Hz), 136.1, 130.7, 130.3 (d, *J*<sub>C-F</sub> = 6.0 Hz), 129.0, 128.8, 128.7, 127.5, 126.8, 124.5, 123.5, 123.1, 117.1, 114.7 (d, *J*<sub>C-F</sub> = 25.0 Hz), 109.3, 59.4, 59.3, 56.6, 52.3, 42.7, 40.6; HRMS (TOF-ESI<sup>+</sup>) *m/z*: calcd for C<sub>28</sub>H<sub>24</sub>FNO<sub>2</sub>Na [M+Na]<sup>+</sup> 448.1683, found 448.1696; HPLC analysis: Daicel Chiralpak OD-H (*i*-PrOH: *n*-Hexane = 70:30; flow rate: 0.8 mL/min; λ = 254 nm; *t*<sub>minor</sub> = 9.0 min, *t*<sub>major</sub> = 10.7 min.

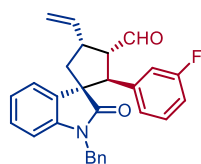

(1*S*,2*S*,3*S*,4*R*)-1'-benzyl-2'-oxo-2-(3-fluorophenyl)-4-vinylspiro[cyclopentane-1,3'-indoline]-3-carbaldehyde (**4at**): white solid (56% yield, 51.0 mg, 0.12 mmol, 87% ee); m.p. 125-127 °C; [α]<sub>D</sub><sup>25</sup> −8.7° (c 0.5, CHCl<sub>3</sub>); <sup>1</sup>H NMR (DMSO-*d*<sub>6</sub>, 400 MHz) δ 9.76 (s, 1H), 7.67 (d, *J* = 7.2 Hz, 1H), 7.22-7.21 (m, 3H), 7.10-7.03 (m, 3H), 6.96-6.92 (m, 2H), 6.89 (dt, *J* = 8.4, 2.0 Hz, 1H), 6.76 (d, *J* = 7.6 Hz, 1H), 6.71 (d, *J* = 10.8 Hz, 1H), 6.65 (d, *J* = 7.6 Hz, 1H), 6.10-6.01 (m, 1H), 5.32 (d, *J* = 16.8 Hz, 1H), 5.16 (dd, *J* = 10.0, 1.2 Hz, 1H), 5.01 (d, *J* = 16.0 Hz, 1H), 4.68 (d, *J* = 16.0 Hz, 1H), 4.22 (d, *J* = 4.4 Hz, 1H), 3.93-3.86 (m, 1H), 2.28 (dd, *J* = 13.2, 8.8 Hz, 1H), 2.16 (dd, *J* = 12.8, 7.6 Hz, 1H); <sup>13</sup>C NMR (DMSO-*d*<sub>6</sub>, 100 MHz) δ 203.5, 178.1, 162.0 (d, *J*<sub>C-F</sub> = 242 Hz), 142.2, 139.9 (d, *J*<sub>C-F</sub> = 7.0 Hz), 138.7, 136.3, 130.8, 130.2 (d, *J*<sub>C-F</sub> = 8.0 Hz), 128.9, 128.5, 127.7, 127.2, 125.2, 124.6, 122.6, 117.4, 114.9 (d, *J*<sub>C-F</sub> = 21.0 Hz), 114.3 (d, *J*<sub>C-F</sub> = 21.0 Hz), 109.5, 59.5, 57.2, 53.0, 43.6, 43.4, 43.3; HRMS (TOF-ESI<sup>+</sup>) *m/z*: calcd for C<sub>28</sub>H<sub>24</sub>FNO<sub>2</sub>Na [M+Na]<sup>+</sup> 448.1683, found 448.1704; HPLC analysis: Daicel Chiralpak AD-H (*i*-PrOH: *n*-Hexane = 80:20; flow rate: 1 mL/min; λ = 254 nm; *t*<sub>major</sub> = 10.1 min, *t*<sub>minor</sub> = 12.5 min.

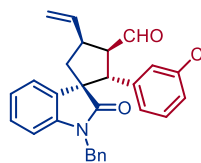

(1*S*,2*R*,3*R*,4*S*)-1'-benzyl-2'-oxo-2-(3-chlorophenyl)-4-vinylspiro[cyclopentane-1,3'-indoline]-3-carbaldehyde (**3au**): white solid (46% yield, 40.6 mg, 0.092 mmol, 95% ee); m.p. 144-145 °C; [α]<sub>D</sub><sup>25</sup> −84.9° (c 0.4, CHCl<sub>3</sub>); <sup>1</sup>H NMR (DMSO-*d*<sub>6</sub>, 400 MHz) δ 9.74 (d, *J* = 1.6 Hz, 1H), 7.75-7.72 (m, 1H), 7.27 (d, *J* = 7.6 Hz, 1H), 7.18-7.12 (m, 6H), 6.98 (s, 1H), 6.84 (d, *J* = 8.0 Hz, 1H), 6.62 (d, *J* = 6.8 Hz, 2H),



6.56-6.54 (m, 1H), 6.13-6.04 (m, 1H), 5.30 (d,  $J = 17.2$  Hz, 1H), 5.16 (d,  $J = 10.0$  Hz, 1H), 4.92 (d,  $J = 16.4$  Hz, 1H), 4.44 (d,  $J = 16.0$  Hz, 1H), 4.35 (t,  $J = 10.2$  Hz, 1H), 4.21 (d,  $J = 11.2$  Hz, 1H), 3.96-3.88 (m, 1H), 2.43 (dd,  $J = 13.2, 7.6$  Hz, 1H), 2.20 (dd,  $J = 13.6, 8.4$  Hz, 1H);  $^{13}\text{C}$  NMR (DMSO- $d_6$ , 100 MHz)  $\delta$  203.7, 178.1, 142.8, 139.6, 139.3, 136.1, 133.2, 130.6, 130.3, 128.9, 128.7, 127.8, 127.7, 127.5, 127.2, 126.7, 123.5, 123.1, 117.1, 109.4, 59.3, 56.5, 52.2, 42.7; HRMS (TOF-ESI $^+$ )  $m/z$ : calcd for  $\text{C}_{28}\text{H}_{24}\text{ClNO}_2\text{Na}$   $[\text{M}+\text{Na}]^+$  464.1388, found 464.1378; HPLC analysis: Daicel Chiralpak OD-H (*i*-PrOH: *n*-Hexane = 70:30; flow rate: 0.8 mL/min;  $\lambda = 254$  nm;  $t_{\text{minor}} = 9.7$  min,  $t_{\text{major}} = 11.0$  min.

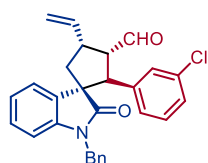

(1*S*,2*S*,3*S*,4*R*)-1'-benzyl-2'-oxo-2-(3-chlorophenyl)-4-vinylspiro[cyclopentane-1,3'-indoline]-3-carbaldehyde (**4au**): white solid (46% yield, 40.6 mg, 0.092 mmol, 69% ee); m.p. 131-132 °C;  $[\alpha]_{\text{D}}^{25} +21.9^\circ$  (c 0.4,  $\text{CHCl}_3$ );  $^1\text{H}$  NMR (DMSO- $d_6$ , 400 MHz)  $\delta$  9.74 (s, 1H), 7.70 (d,  $J = 7.2$  Hz, 1H), 7.29 (d,  $J = 8.4$  Hz, 1H), 7.22-7.16 (m, 4H), 7.13-7.08 (m, 2H), 7.06 (t,  $J = 7.4$  Hz, 1H), 6.92-6.78 (m, 3H), 6.67 (d,  $J = 7.6$  Hz, 1H), 6.08-5.99 (m, 1H), 5.33 (d,  $J = 16.8$  Hz, 1H), 5.17 (d,  $J = 10.0$  Hz, 1H), 5.03 (d,  $J = 16.0$  Hz, 1H), 4.65 (d,  $J = 16.0$  Hz, 1H), 4.23 (t,  $J = 11.0$  Hz, 1H), 4.15 (d,  $J = 12.0$  Hz, 1H), 3.95-3.86 (m, 1H), 2.26 (dd,  $J = 13.2, 8.8$  Hz, 1H), 2.18 (dd,  $J = 12.8, 8.0$  Hz, 1H);  $^{13}\text{C}$  NMR (DMSO- $d_6$ , 100 MHz)  $\delta$  203.3, 177.8, 142.2, 138.7, 138.2, 136.2, 131.0, 130.5, 130.4, 130.3, 130.1, 128.8, 128.7, 127.7, 127.1, 125.2, 122.7, 117.5, 109.7, 59.4, 57.2, 52.6, 43.4, 43.3, 43.1; HRMS (TOF-ESI $^+$ )  $m/z$ : calcd for  $\text{C}_{28}\text{H}_{24}\text{ClNO}_2\text{Na}$   $[\text{M}+\text{Na}]^+$  464.1388, found 464.1355; HPLC analysis: Daicel Chiralpak AD-H (*i*-PrOH: *n*-Hexane = 90:10; flow rate: 1 mL/min;  $\lambda = 254$  nm;  $t_{\text{minor}} = 11.7$  min,  $t_{\text{major}} = 16.4$  min.

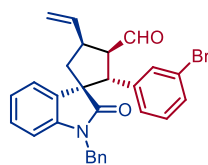

(1*S*,2*R*,3*R*,4*S*)-1'-benzyl-2'-oxo-2-(3-bromophenyl)-4-vinylspiro[cyclopentane-1,3'-indoline]-3-carbaldehyde (**3av**): white solid (13% yield, 12.6 mg, 0.026 mmol, 0 ee); m.p. 163-164 °C;  $^1\text{H}$  NMR (DMSO- $d_6$ , 400 MHz)  $\delta$  9.74 (s, 1H), 7.74-7.73 (m, 1H), 7.40 (d,  $J = 7.6$  Hz, 1H), 7.16-7.13 (m, 6H), 7.05 (t,  $J = 7.8$  Hz, 1H), 6.88 (d,  $J = 7.6$  Hz, 1H), 6.62 (d,  $J = 6.8$  Hz, 1H), 6.55-6.54 (m, 1H), 6.13-6.04 (m, 1H), 5.30 (d,  $J = 16.8$  Hz, 1H), 5.16 (d,  $J = 10.0$  Hz, 1H), 4.92 (d,  $J = 16.4$  Hz, 1H), 4.44 (d,  $J = 16.0$  Hz, 1H), 4.35 (t,  $J = 10.8$  Hz, 1H), 4.20 (d,  $J = 11.2$  Hz, 1H), 3.96-3.87 (m, 1H), 2.42 (dd,  $J = 13.2, 8.0$  Hz, 1H), 2.21 (dd,  $J = 13.2, 8.4$  Hz, 1H);  $^{13}\text{C}$  NMR (DMSO- $d_6$ , 100 MHz)  $\delta$  203.7, 178.1, 142.8, 139.8, 139.3, 136.1, 130.7, 130.6, 128.9, 128.7, 127.5, 126.8, 123.5, 123.1, 121.9, 117.1, 109.3, 59.3, 56.6, 52.3, 42.8, 42.7; HRMS (TOF-ESI $^+$ )  $m/z$ : calcd for  $\text{C}_{28}\text{H}_{24}\text{BrNO}_2\text{Na}$   $[\text{M}+\text{Na}]^+$  508.0883, found 508.0891; HPLC analysis: Daicel Chiralpak OD-H (*i*-PrOH: *n*-Hexane = 70:30; flow rate: 0.8 mL/min;  $\lambda = 254$  nm;  $t_{\text{minor}} = 10.0$  min,  $t_{\text{major}} = 11.4$  min.



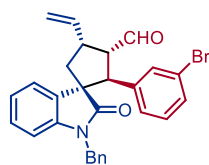

(1*S*,2*S*,3*S*,4*R*)-1'-benzyl-2'-oxo-2-(3-bromophenyl)-4-vinylspiro[cyclopentane-1,3'-indoline]-3-carbaldehyde (**4av**): white solid (37% yield, 35.9 mg, 0.074 mmol, 56% ee); m.p. 131-132 °C;  $[\alpha]_{\text{D}}^{25} +15.9^\circ$  (c 0.3, CHCl<sub>3</sub>); <sup>1</sup>H NMR (DMSO-*d*<sub>6</sub>, 400 MHz)  $\delta$  9.75 (s, 1H), 7.69 (d, *J* = 7.2 Hz, 1H), 7.28 (dd, *J* = 8.0 Hz, 1H), 7.23-7.22 (m, 3H), 7.13-7.09 (m, 3H), 7.05 (t, *J* = 7.4 Hz, 1H), 6.98 (t, *J* = 7.8 Hz, 1H), 6.93-6.91 (m, 3H), 6.62 (d, *J* = 7.6 Hz, 1H), 6.10-6.01 (m, 1H), 5.32 (d, *J* = 17.2 Hz, 1H), 5.17 (d, *J* = 10.8 Hz, 1H), 5.03 (d, *J* = 16.0 Hz, 1H), 4.66 (d, *J* = 16.0 Hz, 1H), 4.25-4.17 (m, 2H), 3.94-3.85 (m, 1H), 2.28 (dd, *J* = 12.8, 8.8 Hz, 1H), 2.16 (dd, *J* = 12.8, 7.6 Hz, 1H); <sup>13</sup>C NMR (DMSO-*d*<sub>6</sub>, 100 MHz)  $\delta$  203.5, 178.0, 142.2, 139.8, 138.8, 136.3, 131.2, 130.7, 130.4, 129.0, 128.6, 127.6, 127.4, 127.1, 125.2, 122.6, 121.7, 117.5, 109.6, 59.6, 57.2, 53.0, 43.6, 43.4, 43.3; HRMS (TOF-ESI<sup>+</sup>) *m/z*: calcd for C<sub>28</sub>H<sub>24</sub>BrNO<sub>2</sub>Na [M+Na]<sup>+</sup> 508.0883, found 508.0854; HPLC analysis: Daicel Chiralpak AD-H (*i*-PrOH: *n*-Hexane = 80:20; flow rate: 1 mL/min;  $\lambda$  = 254 nm; *t*<sub>major</sub> = 9.6 min, *t*<sub>minor</sub> = 11.2 min.

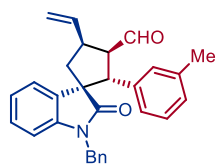

(1*S*,2*R*,3*R*,4*S*)-1'-benzyl-2'-oxo-2-(3-methylphenyl)-4-vinylspiro[cyclopentane-1,3'-indoline]-3-carbaldehyde (**3aw**): white solid (31% yield, 26.1 mg, 0.062 mmol, 94% ee); m.p. 151-152 °C;  $[\alpha]_{\text{D}}^{25} -94.1^\circ$  (c 0.2, CHCl<sub>3</sub>); <sup>1</sup>H NMR (DMSO-*d*<sub>6</sub>, 400 MHz)  $\delta$  9.74 (d, *J* = 2.4 Hz, 1H), 7.72-7.70 (m, 1H), 7.16-7.08 (m, 5H), 7.03-6.95 (m, 2H), 6.75 (s, 1H), 6.70 (d, *J* = 7.6 Hz, 1H), 6.56 (d, *J* = 7.2 Hz, 2H), 6.50-6.48 (m, 1H), 6.14-6.05 (m, 1H), 5.28 (d, *J* = 16.8 Hz, 1H), 5.15 (d, *J* = 10.4 Hz, 1H), 4.91 (d, *J* = 16.0 Hz, 1H), 4.42 (d, *J* = 16.0 Hz, 1H), 4.31-4.25 (m, 1H), 4.17 (d, *J* = 11.2 Hz, 1H), 3.95-3.87 (m, 1H), 2.40 (dd, *J* = 13.2, 7.6 Hz, 1H), 2.23 (dd, *J* = 13.6, 8.4 Hz, 1H), 2.07 (s, 3H); <sup>13</sup>C NMR (DMSO-*d*<sub>6</sub>, 100 MHz)  $\delta$  204.1, 178.3, 142.9, 139.3, 137.4, 136.8, 136.1, 131.0, 130.3, 128.8, 128.5, 128.3, 127.4, 126.7, 125.6, 123.4, 122.9, 109.2, 59.4, 56.8, 53.0, 42.7, 31.5, 22.6, 21.5; HRMS (TOF-ESI<sup>+</sup>) *m/z*: calcd for C<sub>29</sub>H<sub>27</sub>NO<sub>2</sub>Na [M+Na]<sup>+</sup> 444.1934, found 444.1937; HPLC analysis: Daicel Chiralpak OD-H (*i*-PrOH: *n*-Hexane = 90:10; flow rate: 1 mL/min;  $\lambda$  = 254 nm; *t*<sub>minor</sub> = 9.2 min, *t*<sub>major</sub> = 11.5 min.

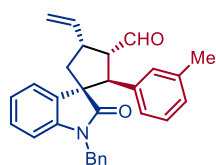

(1*S*,2*S*,3*S*,4*R*)-1'-benzyl-2'-oxo-2-(3-methylphenyl)-4-vinylspiro[cyclopentane-1,3'-indoline]-3-carbaldehyde (**4aw**): white solid (36% yield, 30.3 mg, 0.072 mmol, 73% ee); m.p. 121-122 °C;  $[\alpha]_{\text{D}}^{25} +27.0^\circ$  (c 0.3, CHCl<sub>3</sub>); <sup>1</sup>H NMR (DMSO-*d*<sub>6</sub>, 400 MHz)  $\delta$  9.74 (d, *J* = 2.4 Hz, 1H), 7.66 (d, *J* = 7.6 Hz, 1H), 7.23-7.16 (m, 3H), 7.08 (t, *J* = 7.6 Hz, 1H), 7.02 (t, *J* = 7.4 Hz, 1H), 6.90-6.87 (m, 4H), 6.75-6.70 (m, 2H), 6.58 (d, *J* = 7.6 Hz, 1H), 6.12-6.03 (m, 1H), 5.32 (d, *J* = 16.8 Hz, 1H), 5.16 (d, *J* = 10.0 Hz, 1H), 5.02 (d, *J* = 16.0 Hz, 1H), 4.65 (d, *J* = 16.0 Hz, 1H), 4.19 (d, *J* = 12.0 Hz, 1H), 4.13 (dt, *J* = 10.0, 2.4 Hz, 1H), 3.92-3.83 (m, 1H), 2.29 (dd, *J* = 12.8, 9.2 Hz, 1H), 2.14 (dd, *J* = 13.2, 7.6 Hz, 1H), 2.06 (s, 3H); <sup>13</sup>C NMR (DMSO-*d*<sub>6</sub>, 100 MHz)  $\delta$  203.9, 178.2, 142.2, 138.8, 137.2, 136.7, 136.3, 131.2, 129.3, 128.9, 128.3, 128.1, 127.6, 127.1, 125.2, 122.5, 117.3, 109.5,

59.7, 57.5, 53.5, 43.8, 43.5, 43.2, 21.4; HRMS (TOF-ESI<sup>+</sup>) m/z: calcd for C<sub>29</sub>H<sub>27</sub>NO<sub>2</sub>Na [M+Na]<sup>+</sup> 444.1934, found 444.1938; HPLC analysis: Daicel Chiralpak AD-H (*i*-PrOH: *n*-Hexane = 80:20; flow rate: 1 mL/min; λ = 254 nm; *t*<sub>major</sub> = 8.0 min, *t*<sub>minor</sub> = 10.1 min.

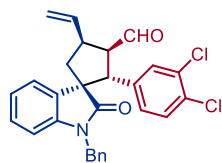

(1*S*,2*R*,3*R*,4*S*)-1'-benzyl-2'-oxo-2-(3,4-dichlorophenyl)-4-vinylspiro[cyclopentane-1,3'-indoline]-3-carbaldehyde (**3ax**): white solid (22% yield, 20.9 mg, 0.044 mmol, 94% ee); m.p. 178-179 °C; [α]<sub>D</sub><sup>25</sup> -75.8° (c 0.2, CHCl<sub>3</sub>); <sup>1</sup>H NMR (DMSO-*d*<sub>6</sub>, 400 MHz) δ 9.73 (d, *J* = 1.6 Hz, 1H), 7.74 (t, *J* = 4.2 Hz, 1H), 7.27 (d, *J* = 9.2 Hz, 1H), 7.18-7.12 (m, 6H), 6.99 (s, 1H), 6.84 (d, *J* = 7.6 Hz, 1H), 6.61 (d, *J* = 7.2 Hz, 2H), 6.56-6.54 (m, 1H), 6.13-6.03 (m, 1H), 5.30 (d, *J* = 16.8 Hz, 1H), 5.16 (d, *J* = 10.4 Hz, 1H), 4.92 (d, *J* = 16.0 Hz, 1H), 4.42-4.46 (m, 1H), 4.36 (t, *J* = 10.8 Hz, 1H), 4.21 (d, *J* = 11.2 Hz, 1H), 3.92 (dd, *J* = 18.0, 8.8 Hz, 1H), 2.43 (dd, *J* = 13.6, 8.0 Hz, 1H), 2.20 (dd, *J* = 13.6, 8.4 Hz, 1H); <sup>13</sup>C NMR (DMSO-*d*<sub>6</sub>, 100 MHz) δ 203.7, 178.1, 142.8, 139.6, 139.3, 136.1, 133.2, 130.6, 130.3, 128.9, 128.7, 127.8, 127.7, 127.5, 127.1, 126.8, 123.5, 123.1, 117.1, 109.3, 59.3, 56.6, 53.2, 42.7; HRMS (TOF-ESI<sup>+</sup>) m/z: calcd for C<sub>28</sub>H<sub>23</sub>Cl<sub>2</sub>NO<sub>2</sub>Na [M+Na]<sup>+</sup> 498.0998, found 498.0991; HPLC analysis: Daicel Chiralpak OD-H (*i*-PrOH: *n*-Hexane = 70:30; flow rate: 0.8 mL/min; λ = 254 nm; *t*<sub>minor</sub> = 9.2 min, *t*<sub>major</sub> = 10.4 min.

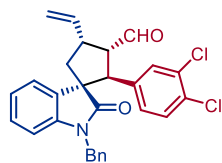

(1*S*,2*S*,3*S*,4*R*)-1'-benzyl-2'-oxo-2-(3,4-dichlorophenyl)-4-vinylspiro[cyclopentane-1,3'-indoline]-3-carbaldehyde (**4ax**): white solid (33% yield, 31.4 mg, 0.066 mmol, 67% ee); m.p. 131-132 °C; [α]<sub>D</sub><sup>25</sup> +6.4° (c 0.3, CHCl<sub>3</sub>); <sup>1</sup>H NMR (DMSO-*d*<sub>6</sub>, 400 MHz) δ 9.75 (s, 1H), 7.69 (d, *J* = 7.2 Hz, 1H), 7.22 (t, *J* = 3.2 Hz, 3H), 7.15-7.09 (m, 2H), 7.07-7.03 (m, 2H), 6.97 (s, 1H), 6.94-6.92 (m, 2H), 6.87 (d, *J* = 7.6 Hz, 1H), 6.63 (d, *J* = 7.6 Hz, 1H), 6.10-6.01 (m, 1H), 5.32 (d, *J* = 16.8 Hz, 1H), 5.17 (d, *J* = 10.0 Hz, 1H), 5.02 (d, *J* = 16.0 Hz, 1H), 4.66 (d, *J* = 16.0 Hz, 1H), 4.26-4.17 (m, 2H), 3.94-3.85 (m, 1H), 2.27 (dd, *J* = 13.2, 9.2 Hz, 1H), 2.17 (dd, *J* = 12.8, 7.6 Hz, 1H); <sup>13</sup>C NMR (DMSO-*d*<sub>6</sub>, 100 MHz) δ 203.5, 178.0, 142.2, 139.5, 138.7, 136.2, 133.0, 130.7, 130.1, 129.0, 128.6, 128.2, 127.7, 127.5, 127.1, 127.0, 125.2, 122.6, 117.5, 109.6, 59.5, 57.2, 53.0, 43.6, 43.4, 43.3; HRMS (TOF-ESI<sup>+</sup>) m/z: calcd for C<sub>28</sub>H<sub>23</sub>Cl<sub>2</sub>NO<sub>2</sub>Na [M+Na]<sup>+</sup> 498.0998, found 498.0974; HPLC analysis: Daicel Chiralpak AD-H (*i*-PrOH: *n*-Hexane = 90:10; flow rate: 1 mL/min; λ = 254 nm; *t*<sub>minor</sub> = 12.2 min, *t*<sub>major</sub> = 17.0 min.

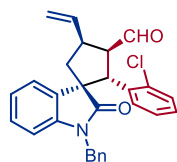

(1*S*,2*S*,3*R*,4*S*)-1'-benzyl-2'-oxo-2-(2-chlorophenyl)-4-vinylspiro[cyclopentane-1,3'-indoline]-3-carbaldehyde (**3ay**): white solid (16% yield, 14.1 mg, 0.032 mmol, 16% ee); m.p. 131-132 °C; [α]<sub>D</sub><sup>25</sup> -3.1° (c 0.1, CHCl<sub>3</sub>); <sup>1</sup>H NMR (DMSO-*d*<sub>6</sub>, 400 MHz) δ 9.57 (s, 1H), 7.30-7.26 (m, 8H), 7.17 (d, *J* = 5.6 Hz, 1H), 7.11 (t, *J* = 7.6 Hz, 1H), 6.83 (d, *J* = 7.6 Hz, 1H), 6.68 (t, *J* = 7.6 Hz, 1H), 6.19-6.11 (m, 2H), 5.24 (d, *J* = 17.2 Hz, 1H), 5.06 (d, *J* = 11.6 Hz, 2H), 4.83 (d, *J* = 15.6 Hz, 1H), 4.58 (d, *J* = 8.8 Hz, 1H), 3.95-4.06 (m, 2H), 2.43 (dd, *J* = 13.6, 10.0 Hz, 1H), 2.07 (dd, *J* = 14.0, 6.0 Hz, 1H); <sup>13</sup>C NMR

(DMSO-*d*<sub>6</sub>, 100 MHz)  $\delta$  202.6, 180.0, 142.9, 142.4, 136.7, 135.3, 135.3, 130.1, 129.9, 129.4, 129.3, 129.0, 128.6, 127.8, 127.6, 127.4, 124.3, 122.2, 60.8, 58.1, 50.2, 43.0, 42.7, 41.2; HRMS (TOF-ESI<sup>+</sup>) *m/z*: calcd for C<sub>28</sub>H<sub>24</sub>ClNO<sub>2</sub>Na [M+Na]<sup>+</sup> 464.1388, found 464.1378; HPLC analysis: Daicel Chiralpak OD-H (*i*-PrOH: *n*-Hexane = 70:30; flow rate: 1 mL/min;  $\lambda$  = 254 nm; *t*<sub>minor</sub> = 9.4 min, *t*<sub>major</sub> = 10.0 min.

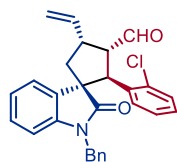

(1*S*,2*R*,3*S*,4*R*)-1'-benzyl-2'-oxo-2-(2-chlorophenyl)-4-vinylspiro[cyclopentane-1,3'-indoline]-3-carbaldehyde (**4ay**): white solid (37% yield, 32.6 mg, 0.074 mmol, 94% ee); m.p. 195-196 °C;  $[\alpha]_D^{25}$  -62.0° (c 0.3, CHCl<sub>3</sub>); <sup>1</sup>H NMR (DMSO-*d*<sub>6</sub>, 400 MHz)  $\delta$  9.73 (d, *J* = 2.0 Hz, 1H), 7.57 (d, *J* = 7.2 Hz, 1H), 7.25 (d, *J* = 8.0 Hz, 1H), 7.22-7.20 (m, 3H), 7.13 (d, *J* = 7.6 Hz, 1H), 7.06 (t, *J* = 7.6 Hz, 2H), 7.00-6.93 (m, 4H), 6.60 (d, *J* = 7.6 Hz, 1H), 6.31-6.22 (m, 1H), 5.32 (d, *J* = 17.2 Hz, 1H), 5.17 (dd, *J* = 10.0 Hz, 1H), 4.91 (d, *J* = 16.0 Hz, 1H), 4.76 (d, *J* = 11.6 Hz, 1H), 4.70 (d, *J* = 16.0 Hz, 1H), 4.18 (t, *J* = 10.4 Hz, 1H), 3.92-3.86 (m, 1H), 2.31 (d, *J* = 7.2 Hz, 2H); <sup>13</sup>C NMR (DMSO-*d*<sub>6</sub>, 100 MHz)  $\delta$  202.9, 178.7, 142.5, 138.8, 136.4, 135.2, 134.3, 131.3, 130.1, 129.6, 128.9, 128.8, 128.4, 127.6, 127.2, 126.5, 125.7, 122.3, 117.4, 109.2, 60.1, 58.0, 48.8, 44.4, 43.7, 43.3; HRMS (TOF-ESI<sup>+</sup>) *m/z*: calcd for C<sub>28</sub>H<sub>24</sub>ClNO<sub>2</sub>Na [M+Na]<sup>+</sup> 464.1388, found 464.1413; HPLC analysis: Daicel Chiralpak AD-H (*i*-PrOH: *n*-Hexane = 80:20; flow rate: 1 mL/min;  $\lambda$  = 254 nm; *t*<sub>minor</sub> = 13.6 min, *t*<sub>major</sub> = 14.5 min.

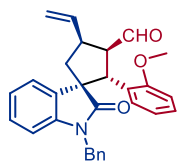

(1*S*,2*R*,3*R*,4*S*)-1'-benzyl-2'-oxo-2-(2-methoxyphenyl)-4-vinylspiro[cyclopentane-1,3'-indoline]-3-carbaldehyde (**3az**): white solid (31% yield, 27.0 mg, 0.062 mmol, 76% ee); m.p. 185-186 °C;  $[\alpha]_D^{25}$  -74.6° (c 0.2, CHCl<sub>3</sub>); <sup>1</sup>H NMR (DMSO-*d*<sub>6</sub>, 400 MHz)  $\delta$  9.72 (d, *J* = 2.4 Hz, 1H), 7.60-7.58 (m, 1H), 7.29 (d, *J* = 7.6 Hz, 1H), 7.18-7.12 (m, 4H), 7.08-7.06 (m, 2H), 6.79 (t, *J* = 7.6 Hz, 2H), 6.71 (d, *J* = 8.0 Hz, 1H), 6.66 (d, *J* = 6.8 Hz, 2H), 6.49-6.47 (m, 1H), 6.17-6.08 (m, 1H), 5.29 (d, *J* = 16.8 Hz, 1H), 5.16 (d, *J* = 10.0 Hz, 1H), 4.90 (d, *J* = 16.0 Hz, 1H), 4.79 (d, *J* = 11.2 Hz, 1H), 4.44 (d, *J* = 16.0 Hz, 1H), 4.16 (dt, *J* = 10.8, 2.4 Hz, 1H), 3.94 (t, *J* = 8.8 Hz, 1H), 3.20 (s, 3H), 2.38 (dd, *J* = 13.2, 7.6 Hz, 1H), 2.26 (dd, *J* = 13.2, 8.4 Hz, 1H); <sup>13</sup>C NMR (DMSO-*d*<sub>6</sub>, 100 MHz)  $\delta$  204.0, 178.6, 157.7, 142.5, 139.1, 136.3, 131.2, 128.8, 128.4, 127.9, 127.4, 127.0, 125.5, 124.2, 122.3, 120.6, 117.1, 111.3, 108.8, 59.0, 58.1, 55.2, 44.7, 43.4, 43.1, 42.7; HRMS (TOF-ESI<sup>+</sup>) *m/z*: calcd for C<sub>29</sub>H<sub>27</sub>NO<sub>3</sub>Na [M+Na]<sup>+</sup> 460.1883, found 460.1881; HPLC analysis: Daicel Chiralpak OD-H (*i*-PrOH: *n*-Hexane = 80:20; flow rate: 1 mL/min;  $\lambda$  = 254 nm; *t*<sub>major</sub> = 21.8 min, *t*<sub>minor</sub> = 23.4 min.

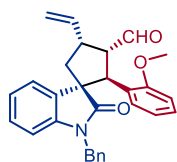

(1*S*,2*S*,3*S*,4*R*)-1'-benzyl-2'-oxo-2-(2-methoxyphenyl)-4-vinylspiro[cyclopentane-1,3'-indoline]-3-carbaldehyde (**4az**, major diastereomer): white solid (41% yield, 35.8 mg, 0.082 mmol, 93% ee); m.p. 134-135 °C;  $[\alpha]_D^{25}$  -11.7° (c 0.3, CHCl<sub>3</sub>); <sup>1</sup>H NMR (DMSO-*d*<sub>6</sub>, 400 MHz)  $\delta$  9.64 (d, *J* = 3.6 Hz, 1H), 7.35-7.32 (m, 5H), 7.29-7.26 (m, 1H), 7.03 (t, *J* = 7.6 Hz, 1H), 6.94 (t, *J* = 7.6 Hz, 1H), 6.81 (t, *J* = 7.6 Hz, 1H), 6.73-6.68 (m, 2H), 6.62 (d, *J* = 7.2 Hz, 1H), 6.57 (d, *J* = 8.4 Hz, 1H), 6.05-5.96 (m,

1H), 5.28 (d,  $J = 17.2$  Hz, 1H), 5.17-5.13 (m, 2H), 4.75 (d,  $J = 15.6$  Hz, 1H), 4.28 (d,  $J = 11.6$  Hz, 1H), 3.73 (dt,  $J = 11.2, 3.6$  Hz, 1H), 3.26 (s, 3H), 2.31-2.26 (m, 1H), 2.00 (t,  $J = 12.2$  Hz, 1H), 1.07 (t,  $J = 7.0$  Hz, 1H);  $^{13}\text{C}$  NMR (DMSO- $d_6$ , 100 MHz)  $\delta$  203.8, 181.5, 157.2, 142.7, 139.0, 137.3, 131.9, 129.1, 128.3, 127.9, 127.8, 127.7, 126.5, 124.7, 121.8, 120.1, 117.0, 110.2, 108.4, 59.8, 56.0, 54.9, 47.4, 45.1, 44.9, 43.1; HRMS (TOF-ESI $^+$ )  $m/z$ : calcd for  $\text{C}_{29}\text{H}_{27}\text{NO}_3\text{Na}$   $[\text{M}+\text{Na}]^+$  460.1883, found 460.1864; HPLC analysis: Daicel Chiralpak AD-H (*i*-PrOH: *n*-Hexane = 80:20; flow rate: 1 mL/min;  $\lambda = 254$  nm;  $t_{\text{major}} = 16.4$  min,  $t_{\text{minor}} = 17.0$  min).

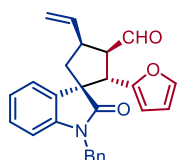

(1*S*,2*S*,3*R*,4*S*)-1'-benzyl-2'-oxo-2-(2-furanyl)-4-vinylspiro[cyclopentane-1,3'-indoline]-3-carbaldehyde (**3ba**): white solid (41% yield, 32.6 mg, 0.082 mmol, 46% ee); m.p. 133-134 °C;  $[\alpha]_{\text{D}}^{25} -106.6^\circ$  (c 0.3,  $\text{CHCl}_3$ );  $^1\text{H}$  NMR (DMSO- $d_6$ , 400 MHz)  $\delta$  9.77 (d,  $J = 2.0$  Hz, 1H), 7.64 (d,  $J = 7.2$  Hz, 1H), 7.31 (s, 1H), 7.25-7.23 (m, 3H), 7.17 (t,  $J = 7.8$  Hz, 1H), 7.10 (t,  $J = 7.4$  Hz, 1H), 6.93 (d,  $J = 6.4$  Hz, 2H), 6.68 (d,  $J = 7.6$  Hz, 1H), 6.24 (s, 1H), 6.07-5.98 (m, 1H), 5.87 (d,  $J = 2.8$  Hz, 1H), 5.27 (d,  $J = 17.2$  Hz, 1H), 5.14 (d,  $J = 10.0$  Hz, 1H), 4.94 (d,  $J = 16.0$  Hz, 1H), 4.59 (d,  $J = 16.0$  Hz, 1H), 4.32 (d,  $J = 10.8$  Hz, 1H), 4.11 (t,  $J = 11.0$  Hz, 1H), 3.94-3.87 (m, 1H), 2.31 (dd,  $J = 13.2, 7.6$  Hz, 1H), 2.21 (dd,  $J = 12.8, 9.2$  Hz, 1H);  $^{13}\text{C}$  NMR (DMSO- $d_6$ , 100 MHz)  $\delta$  203.7, 178.0, 152.1, 142.9, 142.4, 138.8, 136.4, 130.9, 129.0, 128.5, 127.6, 127.2, 123.2, 123.0, 117.2, 110.6, 109.2, 106.9, 57.8, 56.6, 46.5, 42.9, 42.7; HRMS (TOF-ESI $^+$ )  $m/z$ : calcd for  $\text{C}_{26}\text{H}_{23}\text{NO}_3\text{Na}$   $[\text{M}+\text{Na}]^+$  420.1570, found 420.1582; HPLC analysis: Daicel Chiralpak OD-H (*i*-PrOH: *n*-Hexane = 70:30; flow rate: 0.8 mL/min;  $\lambda = 254$  nm;  $t_{\text{minor}} = 21.3$  min,  $t_{\text{major}} = 27.3$  min).

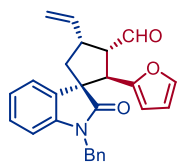

(1*S*,2*R*,3*S*,4*R*)-1'-benzyl-2'-oxo-2-(2-furanyl)-4-vinylspiro[cyclopentane-1,3'-indoline]-3-carbaldehyde (**4ba**): white solid (36% yield, 30.2 mg, 0.072 mmol, 90% ee); m.p. 104-105 °C;  $[\alpha]_{\text{D}}^{25} -31.6^\circ$  (c 0.3,  $\text{CHCl}_3$ );  $^1\text{H}$  NMR (DMSO- $d_6$ , 400 MHz)  $\delta$  9.80 (d,  $J = 2.0$  Hz, 1H), 7.42 (d,  $J = 7.6$  Hz, 1H), 7.34 (t,  $J = 7.4$  Hz, 2H), 7.28-7.23 (m, 3H), 7.17 (s, 1H), 7.10 (t,  $J = 7.6$  Hz, 1H), 6.94 (t,  $J = 7.4$  Hz, 1H), 6.75 (d,  $J = 7.6$  Hz, 1H), 6.08-6.00 (m, 2H), 5.85-5.84 (m, 1H), 5.30 (d,  $J = 16.8$  Hz, 1H), 5.16 (d,  $J = 10.0$  Hz, 1H), 5.09 (d,  $J = 15.6$  Hz, 1H), 4.80 (d,  $J = 16.0$  Hz, 1H), 4.32 (d,  $J = 11.2$  Hz, 1H), 4.04-3.98 (m, 1H), 3.82 (d,  $J = 9.0$  Hz, 1H), 2.23 (dd,  $J = 12.8, 9.2$  Hz, 1H), 2.08 (dd,  $J = 12.8, 7.2$  Hz, 1H);  $^{13}\text{C}$  NMR (DMSO- $d_6$ , 100 MHz)  $\delta$  203.2, 178.2, 152.3, 142.3, 142.1, 138.2, 136.6, 131.1, 129.0, 128.3, 127.7, 127.4, 124.8, 122.5, 117.6, 110.4, 109.4, 106.8, 57.8, 56.9, 46.4, 44.1, 43.7, 43.3; HRMS (TOF-ESI $^+$ )  $m/z$ : calcd for  $\text{C}_{26}\text{H}_{23}\text{NO}_3\text{Na}$   $[\text{M}+\text{Na}]^+$  420.1570, found 420.1566; HPLC analysis: Daicel Chiralpak OD-H (*i*-PrOH: *n*-Hexane = 70:30; flow rate: 0.8 mL/min;  $\lambda = 254$  nm;  $t_{\text{major}} = 20.8$  min,  $t_{\text{minor}} = 22.9$  min).

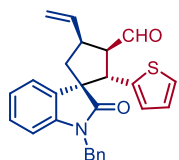

(1*S*,2*S*,3*R*,4*S*)-1'-benzyl-2'-oxo-2-(2-thienyl)-4-vinylspiro[cyclopentane-1,3'-indoline]-3-carbaldehyde (**3bb**): white solid (25% yield, 20.7 mg, 0.05 mmol, 79% ee); m.p. 138-139 °C;  $[\alpha]_{\text{D}}^{25} -89.6^{\circ}$  (c 0.2, CHCl<sub>3</sub>); <sup>1</sup>H NMR (DMSO-*d*<sub>6</sub>, 400 MHz) δ 9.76 (d, *J* = 2.4 Hz, 1H), 7.71 (d, *J* = 6.8 Hz, 1H), 7.23 (d, *J* = 5.2 Hz, 1H), 7.20-7.16 (m, 3H), 6.85-6.83 (m, 1H), 6.70-6.68 (m, 2H), 6.63-6.61 (m, 2H), 6.09-6.00 (m, 1H), 5.28 (d, *J* = 16.4 Hz, 1H), 5.14 (d, *J* = 9.6 Hz, 1H), 4.90 (d, *J* = 16.4 Hz, 1H), 4.48 (dd, *J* = 20.4, 16.0 Hz, 2H), 4.22 (dt, *J* = 11.2, 2.4 Hz, 1H), 3.94-3.85 (m, 1H), 2.37 (dd, *J* = 13.2, 7.6 Hz, 1H), 2.25 (dd, *J* = 13.2, 8.8 Hz, 1H); <sup>13</sup>C NMR (DMSO-*d*<sub>6</sub>, 100 MHz) δ 203.7, 177.9, 143.3, 139.7, 139.1, 136.2, 130.5, 128.9, 128.8, 127.4, 126.9, 125.1, 125.0, 123.5, 123.4, 123.0, 117.2, 109.3, 59.3, 58.1, 48.4, 42.9, 42.7, 42.3; HRMS (TOF-ESI<sup>+</sup>) *m/z*: calcd for C<sub>26</sub>H<sub>23</sub>NO<sub>2</sub>SNa [M+Na]<sup>+</sup> 436.1342, found 436.1347; HPLC analysis: Daicel Chiralpak OD-H (*i*-PrOH: *n*-Hexane = 70:30; flow rate: 0.8 mL/min; λ = 254 nm; *t*<sub>minor</sub> = 9.7 min, *t*<sub>major</sub> = 13.0 min.

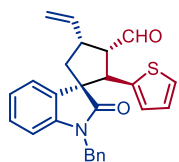

(1*S*,2*R*,3*S*,4*R*)-1'-benzyl-2'-oxo-2-(2-thienyl)-4-vinylspiro[cyclopentane-1,3'-indoline]-3-carbaldehyde (**4bb**, major diastereomer): white solid (39% yield, 32.2 mg, 0.078 mmol, 83% ee); m.p. 107-108 °C;  $[\alpha]_{\text{D}}^{25} -9.2^{\circ}$  (c 0.3, CHCl<sub>3</sub>); <sup>1</sup>H NMR (DMSO-*d*<sub>6</sub>, 400 MHz) δ 9.75 (s, 1H), 7.63 (d, *J* = 7.2 Hz, 1H), 7.22-7.20 (m, 2H), 7.18-7.14 (m, 2H), 7.05 (t, *J* = 7.4 Hz, 1H), 6.89-6.96 (m, 2H), 6.76-6.74 (m, 1H), 6.70 (d, *J* = 7.6 Hz, 1H), 6.62 (d, *J* = 2.4 Hz, 1H), 6.08-5.99 (m, 1H), 5.29 (d, *J* = 16.8 Hz, 1H), 5.15 (d, *J* = 10.4 Hz, 1H), 4.99 (d, *J* = 16.0 Hz, 1H), 4.76 (d, *J* = 16.0 Hz, 1H), 4.51 (d, *J* = 10.8 Hz, 1H), 3.95-3.83 (m, 2H), 2.30-2.26 (m, 1H), 2.16-2.13 (m, 1H); <sup>13</sup>C NMR (DMSO-*d*<sub>6</sub>, 100 MHz) δ 203.6, 177.7, 142.6, 139.7, 138.4, 136.2, 130.8, 128.9, 127.6, 127.1, 126.7, 126.1, 125.4, 125.2, 123.1, 122.8, 117.5, 109.6, 59.7, 59.5, 49.2, 43.8, 43.2, 43.0; HRMS (TOF-ESI<sup>+</sup>) *m/z*: calcd for C<sub>26</sub>H<sub>23</sub>NO<sub>2</sub>SNa [M+Na]<sup>+</sup> 436.1342, found 436.1346; HPLC analysis: Daicel Chiralpak AD-H (*i*-PrOH: *n*-Hexane = 80:20; flow rate: 1 mL/min; λ = 254 nm; *t*<sub>major</sub> = 18.1 min, *t*<sub>minor</sub> = 19.0 min.

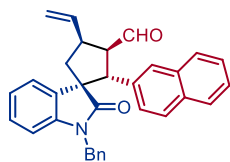

(1*S*,2*R*,3*R*,4*S*)-1'-benzyl-2'-oxo-2-(2-naphthyl)-4-vinylspiro[cyclopentane-1,3'-indoline]-3-carbaldehyde (**3bc**): white solid (38% yield, 34.7 mg, 0.076 mmol, 97% ee); m.p. 105-106 °C;  $[\alpha]_{\text{D}}^{25} -137.9^{\circ}$  (c 0.3, CHCl<sub>3</sub>); <sup>1</sup>H NMR (DMSO-*d*<sub>6</sub>, 400 MHz) δ 9.80 (d, *J* = 2.4 Hz, 1H), 7.82 (t, *J* = 8.4 Hz, 2H), 7.69 (d, *J* = 7.6 Hz, 1H), 7.62-7.56 (m, 2H), 7.51-7.45 (m, 2H), 7.17-7.10 (m, 2H), 6.97 (dd, *J* = 8.4, 1.2 Hz, 1H), 6.89 (t, *J* = 6.8 Hz, 1H), 6.49 (t, *J* = 7.6 Hz, 2H), 6.42 (d, *J* = 7.6 Hz, 1H), 6.29 (d, *J* = 7.6 Hz, 2H), 6.17-6.10 (m, 1H), 5.33 (d, *J* = 17.2 Hz, 1H), 5.18 (dd, *J* = 10.0, 1.6 Hz, 1H), 4.88 (d, *J* = 16.0 Hz, 1H), 4.52 (dt, *J* = 11.6, 2.4 Hz, 1H), 4.40 (d, *J* =

11.2 Hz, 1H), 4.33 (d,  $J = 27.6$  Hz, 1H), 4.01-3.93 (m, 1H), 2.47 (dd,  $J = 13.6, 8.0$  Hz, 1H), 2.29 (dd,  $J = 13.6, 8.4$  Hz, 1H);  $^{13}\text{C}$  NMR (DMSO- $d_6$ , 100 MHz)  $\delta$  204.0, 178.3, 142.8, 139.4, 135.8, 134.7, 133.2, 132.8, 131.0, 128.6, 128.2(9), 128.2(6), 127.8(4), 127.8(0), 126.5, 126.2, 123.5, 123.0, 117.1, 109.2, 59.5, 56.8, 53.1, 43.0, 42.8, 42.6; HRMS (TOF-ESI $^+$ )  $m/z$ : calcd for  $\text{C}_{32}\text{H}_{27}\text{NO}_2\text{Na}$   $[\text{M}+\text{Na}]^+$  480.1934, found 480.1937; HPLC analysis: Daicel Chiralpak OD-H (*i*-PrOH: *n*-Hexane = 70:30; flow rate: 0.8 mL/min;  $\lambda = 254$  nm;  $t_{\text{minor}} = 9.7$  min,  $t_{\text{major}} = 12.1$  min.

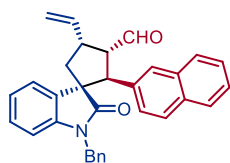

(1*S*,2*S*,3*S*,4*R*)-1'-benzyl-2'-oxo-2-(2-naphthyl)-4-vinylspiro[cyclopentane-1,3'-indoline]-3-carbaldehyde (**4bc**): white solid (43% yield, 39.3 mg, 0.086 mmol, 80% ee); m.p. 86-87 °C;  $[\alpha]_{\text{D}}^{25} +50.2^\circ$  (c 0.4,  $\text{CHCl}_3$ );  $^1\text{H}$  NMR (DMSO- $d_6$ , 400 MHz)  $\delta$  9.80 (d,  $J = 2.4$  Hz, 1H), 7.77-7.76 (m, 2H), 7.70-7.67 (m, 1H), 7.55-7.53 (m, 3H), 7.44 (dd,  $J = 6.0, 3.2$  Hz, 2H), 7.05-7.03 (m, 4H), 6.79 (t,  $J = 7.6$  Hz, 2H), 6.72 (d,  $J = 7.6$  Hz, 1H), 6.50 (dd,  $J = 5.2, 3.2$  Hz, 1H), 6.17-6.08 (m, 1H), 5.35 (d,  $J = 17.2$  Hz, 1H), 5.19 (d,  $J = 10.0$  Hz, 1H), 5.02 (d,  $J = 16.0$  Hz, 1H), 4.59 (d,  $J = 16.4$  Hz, 1H), 4.41 (d,  $J = 12.0$  Hz, 1H), 4.35-4.29 (m, 1H), 3.96 (t,  $J = 9.0$  Hz, 1H), 2.35 (dd,  $J = 13.2, 9.2$  Hz, 1H), 2.21 (dd,  $J = 13.2, 8.0$  Hz, 1H);  $^{13}\text{C}$  NMR (DMSO- $d_6$ , 100 MHz)  $\delta$  203.8, 178.2, 142.2, 138.8, 136.0, 134.6, 133.0, 132.5, 131.1, 128.6, 128.4, 128.1, 127.8, 127.6, 127.5, 127.4, 126.9, 126.5, 126.3, 125.3, 122.6, 117.4, 109.5, 59.9, 57.5, 53.8, 43.9, 43.5, 43.2; HRMS (TOF-ESI $^+$ )  $m/z$ : calcd for  $\text{C}_{32}\text{H}_{27}\text{NO}_2\text{K}$   $[\text{M}+\text{K}]^+$  496.1673, found 496.1693; HPLC analysis: Daicel Chiralpak AD-H (*i*-PrOH: *n*-Hexane = 80:20; flow rate: 1 mL/min;  $\lambda = 254$  nm;  $t_{\text{major}} = 11.7$  min,  $t_{\text{minor}} = 13.7$  min.

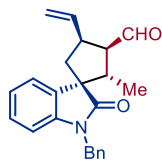

1'-benzyl-2'-oxo-2-methyl-4-vinylspiro[cyclopentane-1,3'-indoline]-3-carbaldehyde (**3bd+4bd**, dr = 1:1): Yellowish oil (55% yield, 38.0 mg, 0.11 mmol, 96% ee);  $[\alpha]_{\text{D}}^{25} -5.1^\circ$  (c 0.3,  $\text{CHCl}_3$ );  $^1\text{H}$  NMR (DMSO- $d_6$ , 400 MHz)  $\delta$  9.87 (d,  $J = 1.2$  Hz, 1.0H), 9.74 (d,  $J = 2.4$  Hz, 0.9H), 7.42-7.22 (m, 14.9H), 7.09-7.03 (m, 2.0H), 6.99-6.94 (m, 2.1H), 6.04-5.87 (m, 2.1H), 5.23 (d,  $J = 16.8$  Hz, 1.2H), 5.16-5.01 (m, 2.2H), 5.04-4.97 (m, 3.4H), 4.88 (d,  $J = 15.6$  Hz, 2.1H), 3.70-3.64 (m, 2.0H), 3.19 (dt,  $J = 11.2, 2.4$  Hz, 1.1H), 3.10-3.06 (m, 1.1H), 2.98-2.94 (m, 1.1H), 2.16-2.11 (m, 1.2H), 2.04-2.02 (m, 3.2H), 0.71 (d,  $J = 7.2$  Hz, 3.3H), 0.46 (d,  $J = 6.8$  Hz, 2.8H);  $^{13}\text{C}$  NMR (DMSO- $d_6$ , 100 MHz)  $\delta$  205.2, 204.1, 179.3, 178.8, 142.7, 142.5, 140.9, 138.8, 137.0, 131.3, 130.7, 129.2, 128.4, 127.9, 127.6, 127.5, 125.1, 124.7, 122.8, 122.6, 109.8, 109.7, 60.5, 58.8, 58.7, 58.2, 44.3, 43.0, 42.9, 42.4, 42.2, 29.5, 29.2, 14.0, 13.5; HRMS (TOF-ESI $^+$ )  $m/z$ : calcd for  $\text{C}_{23}\text{H}_{23}\text{NO}_2\text{Na}$   $[\text{M}+\text{Na}]^+$  368.1621, found 368.1619; HPLC analysis: Daicel Chiralpak AD-H (*i*-PrOH: *n*-Hexane = 80:20; flow rate: 1 mL/min;  $\lambda = 254$  nm;  $t_{\text{minor}} = 10.1$  min,  $t_{\text{major}} = 11.5$  min.

## 2.4 Gram-scale synthesis of enantioenriched spirooxindole **3** and **4**

To a solution of spirovinylcyclopropyl oxindole **1** (1.2 g, 4.4 mmol), and enal **2** (0.69 g, 5.2 mmol, 1.2 equiv.) in THF (40 mL) were added Pd(OAc)<sub>2</sub> (0.049 g, 0.22 mmol, 5 mol%), PPh<sub>3</sub> (0.2 g, 0.44 mmol, 10 mol%), AcOH (0.053 g, 0.88 mmol, 20 mol%) and *Jørgensen-Hayashi* catalyst **C4** (0.29 g, 0.88 mmol, 20 mol%), respectively. The mixture was stirred for about 48 h (TLC monitoring) at room temperature under Ar atmosphere. After the reaction completed, the solvent was removed under reduced pressure. The residue was then extracted with EtOAc (3×50 mL), subsequently washed with brine (3×50 mL). The combined organic layers were dried over MgSO<sub>4</sub>, filtered, and concentrated in *vacuo*. The residue was purified by flash column chromatography on silica gel (Petroleum ether/EtOAc= 19:1 to 9:1) to afford enantioenriched **3** (0.66 g, 1.6 mmol, 96% ee) and **4** (0.59 g, 1.4 mmol, 91% ee), respectively.

## 2.5 Experimental procedure for the synthesis of alcohol derivative **5**

(1*S*,2*S*,3*S*,4*R*)-1'-benzyl-2'-oxo-2-phenyl-4-vinylspiro[cyclopentane-1,3'-indoline]-3-hydroxymethyl (**5**)

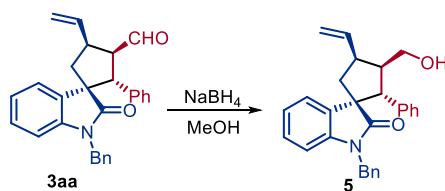

To a solution of spirooxindole **3aa** (40.7 mg, 0.1 mmol, 96% ee) in methanol (1 mL) was added sodium borohydride (4.2 mg, 0.11 mmol, 1.1 equiv.) at 0 °C. The reaction was stirred for 0.5 h at 0 °C and another 0.5 h at room temperature. The reaction was then quenched by water (1 mL) and extracted with EtOAc (3×2 mL), subsequently washed with brine (3×2 mL). The combined organic layers were dried over Na<sub>2</sub>SO<sub>4</sub>, filtered, and concentrated in *vacuo*. The residue was purified by flash column chromatography on silica gel (Petroleum ether/EtOAc= 9:1 to 3:1) to give alcohol derivative **5** (33.9 mg, 0.083 mmol, 83%, 96% ee) as a white solid. m.p. 143-144 °C;  $[\alpha]_D^{25}$  -27.1° (c 0.3, CHCl<sub>3</sub>); <sup>1</sup>H NMR (DMSO-*d*<sub>6</sub>, 400 MHz) δ7.57-7.54 (m, 1H), 7.21 (t, *J*= 7.2 Hz, 1H), 7.14-7.08 (m, 7H), 6.96 (d, *J*= 8.4 Hz, 2H), 6.52 (d, *J*= 7.2 Hz, 2H), 6.46-6.44 (m, 1H), 6.35-6.26 (m, 1H), 5.19 (d, *J*= 17.2 Hz, 1H), 5.13 (d, *J*= 11.2 Hz, 1H), 4.87 (d, *J*= 16.0 Hz, 1H), 4.48 (t, *J*= 4.4 Hz, 1H), 4.40 (d, *J*= 16.0 Hz, 1H), 3.59-3.52



(m, 2H), 3.41 (t,  $J = 5.0$  Hz, 2H), 3.34-3.28 (m, 1H), 2.32 (dd,  $J = 13.2, 7.6$  Hz, 1H), 2.12 (dd,  $J = 13.2, 7.6$  Hz, 1H);  $^{13}\text{C}$  NMR (DMSO- $d_6$ , 100 MHz)  $\delta$  178.8, 142.7, 140.7, 138.0, 136.2, 132.5, 128.8, 128.7, 128.4, 128.1, 127.3(3), 127.2(9), 126.8, 123.0, 122.8, 115.6, 109.0, 60.5, 59.4, 56.1, 47.4, 43.2, 42.7, 42.6; HRMS (TOF-ESI $^+$ )  $m/z$ : calcd for  $\text{C}_{28}\text{H}_{27}\text{NO}_2\text{Na}$   $[\text{M}+\text{Na}]^+$  432.1934, found 432.1938; HPLC analysis: Daicel Chiralpak AD-H (*i*-PrOH: *n*-Hexane = 80:20; flow rate: 1 mL/min;  $\lambda = 254$  nm;  $t_{\text{minor}} = 10.4$  min,  $t_{\text{major}} = 15.0$  min.

## 2.6 Experimental procedure for the synthesis of ester derivative 6

(1*S*,2*S*,3*S*,4*R*)-1'-benzyl-2'-oxo-2-phenyl-4-vinylspiro[cyclopentane-1,3'-indoline]-3-carboxymethyl (**6**, major diastereomer)

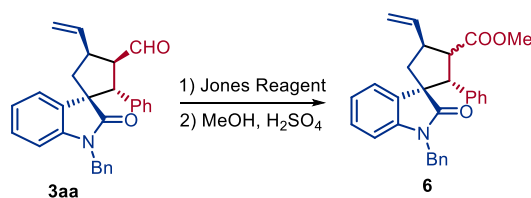

To a solution of spirooxindole **3aa** (40.7 mg, 0.1 mmol, 96% ee) in acetone (1 mL) was added Jones reagent (0.2 mL) at 0 °C. The mixture was stirred for 1 h at 0 °C and then allowed to reach ambient temperature and was stirred for 6 h until full conversion of the starting material was confirmed by TLC analysis. The reaction mixture was poured into water (4 mL) and extracted with EtOAc (3×2 mL), subsequently washed with brine (3×2 mL). The combined organic layers were dried over  $\text{Na}_2\text{SO}_4$ , filtered, and concentrated in *vacuo*. The residue was dissolved with methanol (1 mL) and a drop of concentrated sulfuric acid was added. The mixture was then refluxed for 2 h. After cooling to room temperature, solvent was removed under reduced pressure. The residue was extracted with EtOAc (2×2 mL) and washed with brine (2×2 mL). The combined organic layers were dried over  $\text{Na}_2\text{SO}_4$ , filtered, and concentrated. The residue was purified by flash column chromatography on silica gel (Petroleum ether/EtOAc= 19:1 to 9:1) to give **6** (18.8 mg, 0.043 mmol, 43%) as white solid. m.p. 123-124 °C;  $^1\text{H}$  NMR (DMSO- $d_6$ , 400 MHz)  $\delta$  7.70 (d,  $J = 7.2$  Hz, 1H), 7.20-7.19 (m, 2H), 7.09-7.00 (m, 5H), 6.91-6.88 (m, 3H), 6.59 (d,  $J = 7.6$  Hz, 1H), 5.98-5.89 (m, 1H), 5.22 (d,  $J = 16.8$  Hz, 1H), 5.11 (d,  $J = 10.0$  Hz, 1H), 4.98 (d,  $J = 16.0$  Hz, 1H), 4.65 (d,  $J = 16.0$  Hz, 1H), 4.15-4.13 (m, 2H), 3.55 (s, 3H), 2.26 (dd,  $J = 13.2, 8.8$  Hz, 1H), 2.17 (dd,  $J = 12.8, 8.0$  Hz, 1H);  $^{13}\text{C}$  NMR (DMSO- $d_6$ , 100 MHz)  $\delta$  178.2, 172.6, 142.2, 139.0, 136.7, 136.2, 131.2, 128.9, 128.2, 127.6, 127.2, 125.3, 122.6, 117.1,



109.4, 59.5, 56.1, 52.0 (d,  $J = 4.0$  Hz), 51.8, 43.7, 43.3, 43.2; HRMS (TOF-ESI<sup>+</sup>)  $m/z$ : calcd for C<sub>29</sub>H<sub>27</sub>NO<sub>3</sub>Na [M+Na]<sup>+</sup> 460.1883, found 460.1894.

## 2.7 Computational Details

### 2.7.1 Determination of the absolute configuration of **3an**

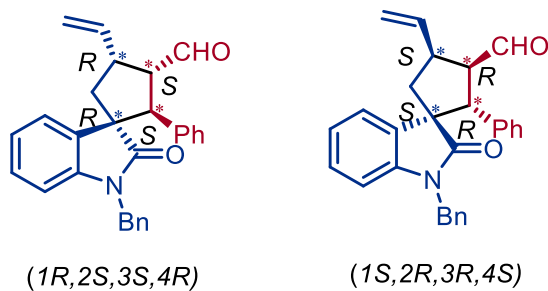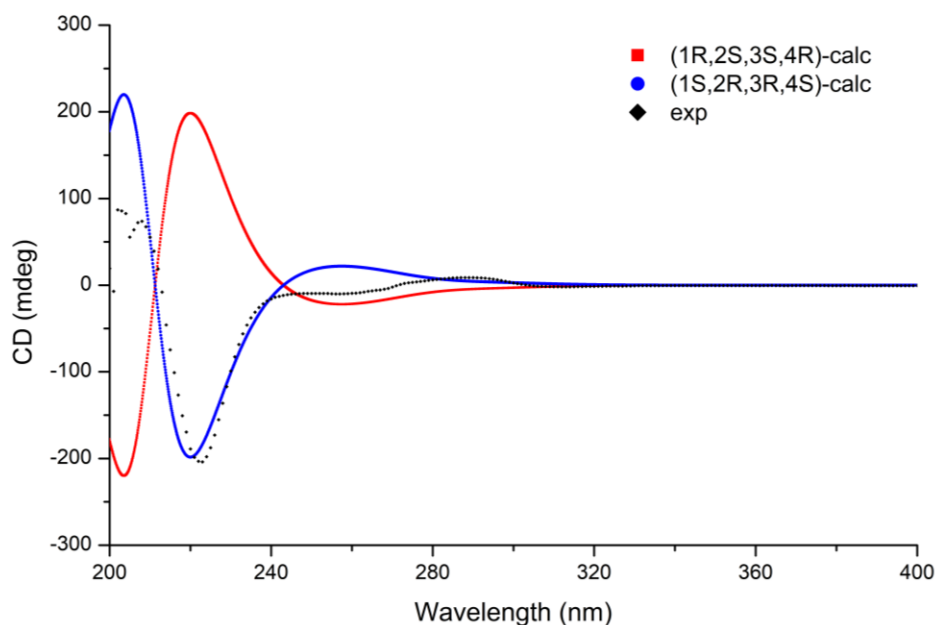

**Figure S1** Experimental and calculated ECD spectra of compound **3an**.

The absolute configuration was assigned by X-ray crystallography and circular dichroism spectroscopy. The racemic crystallography data of **3an** suggests that the plausible configurations could be either (1R, 2S, 3S, 4R) or (1S, 2R, 3R, 4S). To figure out the dominant enantiomer in this asymmetric reaction, the CD spectrum of **3an** was collected. As shown in Figure S1, comparisons between experimental and predicted CD spectra suggest that the dominant configuration of the product **3an** is (1S, 2R, 3R, 4S) (Figure S1-2).

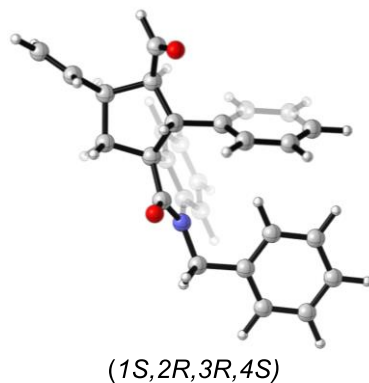

**Figure S2** Predicted configuration of **3an** based on CD spectrum and X-ray crystallography.

### 2.7.2 Computational details of circular dichroism spectra

The ECD spectrum of (**1*R*,2*S*,3*S*,4*R***)-**3an** was generated by TDDFT calculations as follows, while that of (**1*S*,2*R*,3*R*,4*S***)-**3an** was obtained by mirror inversion from its enantiomer. Conformational search was carried out to access all possible stable conformations. The initial conformers were optimized at M06-2X<sup>2</sup>/def2-SVP<sup>3</sup> theoretical level in methanol with SMD solvent model<sup>4</sup> using Gaussian16 software.<sup>5</sup> Frequency calculations were carried out at the same theoretical level to obtain the thermal corrections and confirm well-defined minima on the potential energy surface. Quasi-harmonic approximation was employed for derivation of the vibrational entropy with a frequency cut-off, 100 cm<sup>-1</sup>.<sup>6</sup> Single point energy calculations were performed at M06-2X/def2-TZVP-SMD(methanol) theoretical level. For all the optimized conformers, the Gibbs free energies were given by adding the thermal corrections (with vibrational entropy obtained by quasi-harmonic approximation) from frequency calculation to the electronic energy from single point energy calculation. The optimized stable conformers were then used for TDDFT calculation at the CAM-B3LYP<sup>7</sup>/def2-TZVP level in methanol using SMD solvent model. The number of excitation states was chosen to be 35. The overall ECD curves were weighted by Boltzmann distribution based on Gibbs free energies. The ECD spectra were generated with the help of SpecDis 1.7 software,<sup>8</sup> with a half-bandwidth of 0.3 eV. The calculated ECD curves were red-shift by 12 nm and scaled to fit better with the experimental curves.

### 2.7.3 Table of energies and other thermodynamic parameters.

| Conformers               | E            | E(SP)       | ZPE     | H           | T•S     | G           | T•S <sub>qh</sub> | G <sub>qh</sub> |
|--------------------------|--------------|-------------|---------|-------------|---------|-------------|-------------------|-----------------|
| (1R,2S,3S,4R)-3an_conf1  | -1285.799385 | -1287.21286 | 0.46350 | -1285.30927 | 0.08399 | -1285.39326 | 0.07832           | -1285.38759     |
| (1R,2S,3S,4R)-3an_conf2  | -1285.797365 | -1287.20973 | 0.46438 | -1285.30662 | 0.08252 | -1285.38914 | 0.07755           | -1285.38417     |
| (1R,2S,3S,4R)-3an_conf3  | -1285.797488 | -1287.21050 | 0.46423 | -1285.30684 | 0.08316 | -1285.39000 | 0.07782           | -1285.38465     |
| (1R,2S,3S,4R)-3an_conf4  | -1285.796719 | -1287.21073 | 0.46396 | -1285.30617 | 0.08364 | -1285.38981 | 0.07802           | -1285.38419     |
| (1R,2S,3S,4R)-3an_conf5  | -1285.795005 | -1287.20827 | 0.46423 | -1285.30413 | 0.08586 | -1285.38999 | 0.07906           | -1285.38319     |
| (1R,2S,3S,4R)-3an_conf6  | -1285.794483 | -1287.20907 | 0.46350 | -1285.30406 | 0.08769 | -1285.39175 | 0.07992           | -1285.38398     |
| (1R,2S,3S,4R)-3an_conf7  | -1285.797035 | -1287.21069 | 0.46359 | -1285.30666 | 0.08621 | -1285.39287 | 0.07929           | -1285.38595     |
| (1R,2S,3S,4R)-3an_conf8  | -1285.796589 | -1287.21130 | 0.46355 | -1285.30630 | 0.08477 | -1285.39107 | 0.07861           | -1285.38491     |
| (1R,2S,3S,4R)-3an_conf9  | -1285.796414 | -1287.21069 | 0.46374 | -1285.30608 | 0.08422 | -1285.39030 | 0.07834           | -1285.38443     |
| (1R,2S,3S,4R)-3an_conf10 | -1285.796382 | -1287.20997 | 0.46318 | -1285.30638 | 0.08588 | -1285.39226 | 0.07928           | -1285.38566     |
| (1R,2S,3S,4R)-3an_conf11 | -1285.794250 | -1287.20887 | 0.46351 | -1285.30392 | 0.08636 | -1285.39028 | 0.07939           | -1285.38330     |
| (1R,2S,3S,4R)-3an_conf12 | -1285.795218 | -1287.20867 | 0.46407 | -1285.30466 | 0.08367 | -1285.38833 | 0.07801           | -1285.38267     |
| (1R,2S,3S,4R)-3an_conf13 | -1285.794688 | -1287.20569 | 0.46378 | -1285.30455 | 0.08303 | -1285.38759 | 0.07776           | -1285.38232     |
| (1R,2S,3S,4R)-3an_conf14 | -1285.793693 | -1287.20565 | 0.46374 | -1285.30357 | 0.08343 | -1285.38699 | 0.07802           | -1285.38158     |
| (1R,2S,3S,4R)-3an_conf15 | -1285.791938 | -1287.20458 | 0.46359 | -1285.30195 | 0.08344 | -1285.38539 | 0.07799           | -1285.37994     |
| (1R,2S,3S,4R)-3an_conf16 | -1285.798587 | -1287.21009 | 0.46414 | -1285.30807 | 0.08264 | -1285.39070 | 0.07767           | -1285.38573     |
| (1R,2S,3S,4R)-3an_conf17 | -1285.794983 | -1287.20816 | 0.46383 | -1285.30458 | 0.08485 | -1285.38943 | 0.07857           | -1285.38315     |

Notes: E, ZPE, H, T•S, and G are the electronic energies, sum of electronic and zero-point energies, sum of electronic and thermal enthalpies, the product of temperature (298.15 K) times the standard entropy (by rigid-rotor-harmonic-oscillator approximation) obtained using Gaussian16, and sum of electronic and thermal free energies, respectively, which were given at the M06-2X/def2-SVP theoretical level in methanol with SMD solvent model. T•S<sub>qh</sub> is the product of temperature (298.15 K) times the entropy given by quasi-harmonic approximation. G<sub>qh</sub> is sum of electronic and thermal free energies with vibration entropies given by quasi-harmonic approximation. E(SP) were the electronic energies given at the M06-2X/def2-TZVP theoretical level in methanol with SMD solvent model.

## 2.7.4 Coordinates for stable conformations.

| <b>(1R,2S,3S,4R)-3an_conf1</b> |           |           |           | <b>(1R,2S,3S,4R)-3an_conf2</b> |           |          |           |
|--------------------------------|-----------|-----------|-----------|--------------------------------|-----------|----------|-----------|
| 0 imaginary frequency          |           |           |           | 0 imaginary frequency          |           |          |           |
| C                              | 0.680413  | -1.788554 | 0.351883  | C                              | -0.388320 | 2.093573 | -0.246709 |
| C                              | -0.653877 | -1.481445 | 0.659754  | C                              | 0.915586  | 1.734857 | 0.135559  |
| C                              | -1.169120 | -1.846292 | 1.896692  | C                              | 1.551767  | 2.442059 | 1.146529  |
| C                              | -0.331908 | -2.486342 | 2.821751  | C                              | 0.869625  | 3.490405 | 1.780570  |
| C                              | 0.997584  | -2.762178 | 2.503258  | C                              | -0.430823 | 3.818274 | 1.400850  |
| C                              | 1.527887  | -2.420705 | 1.253401  | C                              | -1.082893 | 3.124646 | 0.373974  |
| C                              | -0.128768 | -0.832280 | -1.556410 | C                              | 0.167324  | 0.389922 | -1.659248 |
| N                              | 0.971223  | -1.382908 | -0.959496 |                                |           |          |           |
| C                              | 2.252615  | -1.543277 | -1.604876 |                                |           |          |           |
| C                              | 3.350758  | -0.675532 | -1.022471 |                                |           |          |           |
| C                              | 3.079148  | 0.430373  | -0.211778 |                                |           |          |           |
| C                              | 4.681481  | -0.986127 | -1.328082 |                                |           |          |           |
| C                              | 4.124995  | 1.216827  | 0.278201  |                                |           |          |           |
| C                              | 5.723560  | -0.198588 | -0.843023 |                                |           |          |           |
| C                              | 5.447448  | 0.907387  | -0.036252 |                                |           |          |           |
| O                              | -0.177036 | -0.402653 | -2.694486 |                                |           |          |           |
| C                              | -1.266998 | -0.796382 | -0.536773 |                                |           |          |           |
| C                              | -1.690338 | 0.686560  | -0.336979 |                                |           |          |           |
| C                              | -2.586236 | -1.402177 | -1.034086 |                                |           |          |           |
| C                              | -3.033369 | 0.566457  | 0.381591  |                                |           |          |           |
| C                              | -3.700459 | -0.738290 | -0.183011 |                                |           |          |           |
| C                              | -0.649299 | 1.601893  | 0.258354  |                                |           |          |           |
| C                              | -0.291273 | 1.553501  | 1.613137  |                                |           |          |           |
| C                              | 0.007799  | 2.516880  | -0.575713 |                                |           |          |           |
| C                              | 0.699600  | 2.397552  | 2.116265  |                                |           |          |           |
| C                              | 0.994580  | 3.365368  | -0.073653 |                                |           |          |           |
| C                              | 1.342749  | 3.308223  | 1.276143  |                                |           |          |           |
| C                              | -3.887830 | 1.795364  | 0.232061  |                                |           |          |           |
| O                              | -3.552187 | 2.778786  | -0.384234 |                                |           |          |           |
| C                              | -4.934616 | -0.483971 | -1.003543 |                                |           |          |           |
| C                              | -6.126391 | -1.036053 | -0.777096 |                                |           |          |           |
| H                              | -2.208595 | -1.639652 | 2.159313  |                                |           |          |           |



|   |           |           |           |                                |           |           |           |
|---|-----------|-----------|-----------|--------------------------------|-----------|-----------|-----------|
| C | -3.690349 | -0.796965 | 0.053130  |                                |           |           |           |
| C | -0.681133 | 1.614780  | 0.283335  | <b>(1R,2S,3S,4R)-3an_conf4</b> |           |           |           |
| C | -0.056682 | 2.507128  | -0.598906 | 0 imaginary frequency          |           |           |           |
| C | -0.283061 | 1.613425  | 1.627861  | C                              | -0.436725 | 2.096240  | 0.034061  |
| C | 0.938897  | 3.377339  | -0.154347 | C                              | 0.892780  | 1.696524  | 0.246946  |
| C | 0.716558  | 2.478850  | 2.073522  | C                              | 1.624116  | 2.262300  | 1.281747  |
| C | 1.328372  | 3.365245  | 1.185168  | C                              | 1.004191  | 3.200476  | 2.119724  |
| C | -3.935492 | 1.773944  | 0.238335  | C                              | -0.325718 | 3.563112  | 1.911404  |
| O | -3.636835 | 2.678087  | -0.505157 | C                              | -1.069891 | 3.019707  | 0.856745  |
| C | -5.068210 | -0.682453 | -0.547269 | C                              | 0.001145  | 0.647415  | -1.674887 |
| C | -5.438148 | -1.042699 | -1.776779 | N                              | -0.941221 | 1.455071  | -1.108902 |
| H | -2.113852 | -1.530384 | 2.365156  | C                              | -2.287469 | 1.582000  | -1.641765 |
| H | -0.564382 | -2.603087 | 3.977690  | C                              | -3.219833 | 0.499639  | -1.141941 |
| H | 1.769640  | -3.128121 | 3.328329  | C                              | -3.821676 | 0.600858  | 0.118238  |
| H | 2.596962  | -2.607800 | 1.031180  | C                              | -3.485609 | -0.622254 | -1.935417 |
| H | 2.494410  | -2.642315 | -1.513776 | C                              | -4.688125 | -0.394670 | 0.570173  |
| H | 1.992203  | -1.377939 | -2.650180 | C                              | -4.355531 | -1.616751 | -1.485748 |
| H | 4.820739  | -1.892800 | -2.010608 | C                              | -4.961354 | -1.502565 | -0.233999 |
| H | 2.009886  | 0.695388  | -0.015251 | O                              | -0.158232 | -0.018758 | -2.683375 |
| H | 6.691040  | -0.444901 | -1.259279 | C                              | 1.244328  | 0.658747  | -0.787522 |
| H | 3.877058  | 2.133648  | 0.741291  | C                              | 1.411529  | -0.782937 | -0.213754 |
| H | 6.225743  | 1.577789  | 0.123654  | C                              | 2.578526  | 0.840643  | -1.515995 |
| H | -1.964859 | 0.995835  | -1.276743 | C                              | 2.827072  | -0.742886 | 0.373144  |
| H | -2.625873 | -2.537557 | -0.791980 | C                              | 3.646538  | 0.136202  | -0.636612 |
| H | -2.783617 | -1.150711 | -1.903790 | C                              | 0.287564  | -1.262985 | 0.670913  |
| H | -2.903764 | 0.557061  | 1.590332  | C                              | -0.711301 | -2.075253 | 0.115792  |
| H | -3.801736 | -1.409756 | 0.960288  | C                              | 0.179310  | -0.890253 | 2.017851  |
| H | -0.359555 | 2.515718  | -1.649013 | C                              | -1.787093 | -2.514399 | 0.887004  |
| H | -0.758461 | 0.933604  | 2.337639  | C                              | -0.903956 | -1.317651 | 2.786489  |
| H | 1.411028  | 4.066634  | -0.857172 | C                              | -1.888667 | -2.131438 | 2.224763  |
| H | 1.014262  | 2.464726  | 3.123784  | C                              | 3.375430  | -2.128911 | 0.570176  |
| H | 2.104578  | 4.047081  | 1.538315  | O                              | 3.836509  | -2.525698 | 1.613675  |
| H | -4.896448 | 1.803969  | 0.797518  | C                              | 4.631041  | -0.640509 | -1.469769 |
| H | -5.833324 | -0.283503 | 0.128418  | C                              | 5.955170  | -0.509212 | -1.389480 |
| H | -6.476543 | -0.929852 | -2.097978 | H                              | 2.667807  | 1.988440  | 1.449063  |
| H | -4.740649 | -1.465419 | -2.504179 | H                              | 1.567894  | 3.648933  | 2.938994  |

|                                |           |           |           |   |           |           |           |
|--------------------------------|-----------|-----------|-----------|---|-----------|-----------|-----------|
| H                              | -0.798305 | 4.291029  | 2.573388  | C | 4.942664  | 0.673475  | -0.566136 |
| H                              | -2.104658 | 3.320260  | 0.689638  | C | 3.745830  | -1.415104 | -0.727236 |
| H                              | -2.665341 | 2.577042  | -1.371983 | C | 6.100161  | -0.017140 | -0.201349 |
| H                              | -2.208772 | 1.533257  | -2.735917 | C | 4.899566  | -2.105395 | -0.359723 |
| H                              | -3.621840 | 1.474352  | 0.743601  | C | 6.080521  | -1.407423 | -0.096300 |
| H                              | -3.012613 | -0.708821 | -2.916569 | O | 0.335502  | -0.945968 | -2.182116 |
| H                              | -5.157371 | -0.301058 | 1.551569  | C | -0.710546 | -0.728893 | 0.023732  |
| H                              | -4.562819 | -2.482973 | -2.117240 | C | -2.055481 | -0.121810 | -0.473959 |
| H                              | -5.644680 | -2.278542 | 0.116685  | C | -1.099306 | -2.201810 | 0.188502  |
| H                              | 1.437467  | -1.433062 | -1.105751 | C | -3.107698 | -0.791734 | 0.414093  |
| H                              | 2.819014  | 1.896043  | -1.698777 | C | -2.492360 | -2.179995 | 0.836149  |
| H                              | 2.501035  | 0.331779  | -2.489460 | C | -2.056607 | 1.385124  | -0.577197 |
| H                              | 2.830200  | -0.258843 | 1.359148  | C | -2.421969 | 2.221031  | 0.485858  |
| H                              | 4.208656  | 0.877113  | -0.051396 | C | -1.601243 | 1.975464  | -1.764998 |
| H                              | -0.636431 | -2.369607 | -0.934657 | C | -2.334030 | 3.608558  | 0.362926  |
| H                              | 0.943652  | -0.259097 | 2.475667  | C | -1.508549 | 3.361391  | -1.888601 |
| H                              | -2.547869 | -3.157364 | 0.440799  | C | -1.875773 | 4.183449  | -0.822609 |
| H                              | -0.974645 | -1.016832 | 3.833559  | C | -4.447039 | -0.887993 | -0.268339 |
| H                              | -2.732414 | -2.469539 | 2.829871  | O | -4.662061 | -0.499806 | -1.391774 |
| H                              | 3.319614  | -2.805477 | -0.313416 | C | -3.362533 | -3.372689 | 0.534030  |
| H                              | 4.201700  | -1.351772 | -2.186595 | C | -3.047663 | -4.412349 | -0.239562 |
| H                              | 6.624734  | -1.097988 | -2.021360 | H | -1.487196 | -0.341618 | 2.873720  |
| H                              | 6.413569  | 0.195732  | -0.688634 | H | -0.119824 | 0.991278  | 4.459848  |
|                                |           |           |           | H | 1.991421  | 2.056796  | 3.719670  |
|                                |           |           |           | H | 2.793891  | 1.792670  | 1.369862  |
| <b>(1R,2S,3S,4R)-3an_conf5</b> |           |           |           | H | 2.296843  | 0.548888  | -2.317393 |
| 0 imaginary frequency          |           |           |           | H | 2.642465  | 1.808017  | -1.110885 |
| C                              | 1.083973  | 0.574343  | 0.827139  | H | 4.956830  | 1.763769  | -0.640960 |
| C                              | -0.117386 | -0.034654 | 1.224829  | H | 2.825012  | -1.966053 | -0.939047 |
| C                              | -0.555132 | 0.114101  | 2.533805  | H | 7.018251  | 0.535300  | 0.007786  |
| C                              | 0.215703  | 0.870792  | 3.428762  | H | 4.878263  | -3.193966 | -0.280144 |
| C                              | 1.403456  | 1.469917  | 3.011674  | H | 6.983524  | -1.948502 | 0.192550  |
| C                              | 1.861390  | 1.329595  | 1.695703  | H | -2.186193 | -0.524427 | -1.491512 |
| C                              | 0.359312  | -0.506943 | -1.045552 | H | -0.367486 | -2.776251 | 0.773035  |
| N                              | 1.332546  | 0.296213  | -0.525834 | H | -1.151205 | -2.630841 | -0.823729 |
| C                              | 2.508573  | 0.725714  | -1.252969 | H | -3.295491 | -0.211785 | 1.331945  |
| C                              | 3.759434  | -0.019216 | -0.834906 |   |           |           |           |

|                                |           |           |           |                                |           |           |           |
|--------------------------------|-----------|-----------|-----------|--------------------------------|-----------|-----------|-----------|
| H                              | -2.372869 | -2.156885 | 1.930020  | C                              | -2.304592 | 2.267611  | 0.330603  |
| H                              | -2.776187 | 1.793813  | 1.425873  | C                              | -0.948284 | 3.397437  | -1.828204 |
| H                              | -1.316488 | 1.332701  | -2.602621 | C                              | -2.097161 | 3.647268  | 0.276747  |
| H                              | -2.625502 | 4.243570  | 1.201809  | C                              | -1.414804 | 4.215823  | -0.798066 |
| H                              | -1.152720 | 3.800045  | -2.822841 | C                              | -4.431719 | -0.410173 | -0.391620 |
| H                              | -1.808246 | 5.268905  | -0.916733 | O                              | -5.333913 | 0.143063  | 0.191058  |
| H                              | -5.270060 | -1.325401 | 0.338549  | C                              | -3.532719 | -3.100292 | -0.484893 |
| H                              | -4.334750 | -3.376972 | 1.039403  | C                              | -4.371066 | -4.019894 | -0.006887 |
| H                              | -3.750628 | -5.238527 | -0.371447 | H                              | -1.547323 | -0.590967 | 2.741071  |
| H                              | -2.090598 | -4.490678 | -0.761390 | H                              | -0.236070 | 0.677713  | 4.433958  |
| <b>(1R,2S,3S,4R)-3an_conf6</b> |           |           |           | H                              | 1.893736  | 1.778158  | 3.810512  |
| 0 imaginary frequency          |           |           |           | H                              | 2.784725  | 1.603616  | 1.483856  |
| C                              | 1.087462  | 0.424417  | 0.827062  | H                              | 2.436294  | 0.461668  | -2.261779 |
| C                              | -0.135571 | -0.182542 | 1.153934  | H                              | 2.721354  | 1.701789  | -1.020216 |
| C                              | -0.613016 | -0.103719 | 2.454343  | H                              | 2.897813  | -2.069893 | -0.829321 |
| C                              | 0.129350  | 0.608500  | 3.408349  | H                              | 5.032963  | 1.657386  | -0.522768 |
| C                              | 1.329513  | 1.225278  | 3.057248  | H                              | 4.931310  | -3.295643 | -0.109219 |
| C                              | 1.836003  | 1.137676  | 1.754048  | H                              | 7.074832  | 0.430841  | 0.187473  |
| C                              | 0.440146  | -0.607987 | -1.101121 | H                              | 7.028824  | -2.050802 | 0.398372  |
| N                              | 1.393902  | 0.176145  | -0.519893 | H                              | -2.085645 | -0.442083 | -1.676784 |
| C                              | 2.599388  | 0.621114  | -1.185839 | H                              | -0.623601 | -2.844953 | 0.725053  |
| C                              | 3.835419  | -0.124592 | -0.726411 | H                              | -1.081797 | -2.715981 | -0.989591 |
| C                              | 3.815165  | -1.518898 | -0.603310 | H                              | -3.089507 | -0.203694 | 1.212483  |
| C                              | 5.014014  | 0.567981  | -0.437014 | H                              | -2.862945 | -2.455228 | 1.420470  |
| C                              | 4.958003  | -2.208150 | -0.200943 | H                              | -0.802686 | 1.383507  | -2.589501 |
| C                              | 6.160438  | -0.121536 | -0.037457 | H                              | -2.843288 | 1.846219  | 1.181315  |
| C                              | 6.134473  | -1.510646 | 0.082240  | H                              | -0.422001 | 3.833273  | -2.679600 |
| O                              | 0.469020  | -1.029919 | -2.243761 | H                              | -2.473309 | 4.280249  | 1.082740  |
| C                              | -0.696399 | -0.808744 | -0.097656 | H                              | -1.252538 | 5.294572  | -0.837210 |
| C                              | -1.961085 | -0.069000 | -0.644243 | H                              | -4.563445 | -0.743311 | -1.446418 |
| C                              | -1.199779 | -2.252912 | 0.002160  | H                              | -3.410588 | -2.992998 | -1.570198 |
| C                              | -3.080640 | -0.664222 | 0.216344  | H                              | -4.943728 | -4.669649 | -0.673311 |
| C                              | -2.706666 | -2.175831 | 0.369563  | H                              | -4.509871 | -4.154836 | 1.070557  |
| C                              | -1.833605 | 1.435690  | -0.692946 | <b>(1R,2S,3S,4R)-3an_conf7</b> |           |           |           |
| C                              | -1.160881 | 2.020818  | -1.776209 | 0 imaginary frequency          |           |           |           |



|                                |           |           |           |                       |           |           |           |
|--------------------------------|-----------|-----------|-----------|-----------------------|-----------|-----------|-----------|
| C                              | 1.086234  | 0.351764  | 0.856828  | H                     | 2.673380  | 1.747317  | -0.954301 |
| C                              | -0.135231 | -0.261912 | 1.176225  | H                     | 5.010312  | 1.660201  | -0.584136 |
| C                              | -0.575854 | -0.266691 | 2.491875  | H                     | 2.813460  | -2.028175 | -0.923110 |
| C                              | 0.203903  | 0.366322  | 3.471568  | H                     | 7.062924  | 0.385771  | -0.001292 |
| C                              | 1.403479  | 0.989625  | 3.129865  | H                     | 4.858226  | -3.301995 | -0.330861 |
| C                              | 1.871358  | 0.987797  | 1.809426  | H                     | 6.991797  | -2.100953 | 0.129807  |
| C                              | 0.364228  | -0.526308 | -1.121233 | H                     | -2.173578 | -0.294094 | -1.604798 |
| N                              | 1.347335  | 0.201413  | -0.513626 | H                     | -0.648129 | -2.895192 | 0.523757  |
| C                              | 2.539147  | 0.679114  | -1.180606 | H                     | -1.260819 | -2.591029 | -1.121094 |
| C                              | 3.781215  | -0.099050 | -0.797389 | H                     | -3.152913 | -0.199413 | 1.293340  |
| C                              | 4.980296  | 0.568796  | -0.534314 | H                     | -2.768003 | -2.421152 | 1.496971  |
| C                              | 3.747007  | -1.496136 | -0.719391 | H                     | -1.070979 | 1.567764  | -2.523273 |
| C                              | 6.132680  | -0.147601 | -0.206228 | H                     | -2.587580 | 1.794501  | 1.504908  |
| C                              | 4.896221  | -2.212474 | -0.388170 | H                     | -0.642876 | 4.012420  | -2.496586 |
| C                              | 6.092746  | -1.539619 | -0.131334 | H                     | -2.173859 | 4.223529  | 1.525327  |
| O                              | 0.351636  | -0.860629 | -2.292499 | H                     | -1.191280 | 5.353281  | -0.466032 |
| C                              | -0.742905 | -0.785526 | -0.099825 | H                     | -5.329612 | -0.882854 | 0.272646  |
| C                              | -2.012108 | 0.002552  | -0.554364 | H                     | -3.708554 | -2.879385 | -1.409362 |
| C                              | -1.269339 | -2.223299 | -0.083171 | H                     | -4.923241 | -4.753155 | -0.413689 |
| C                              | -3.119072 | -0.635101 | 0.281044  | H                     | -4.233220 | -4.324035 | 1.270188  |
| C                              | -2.730199 | -2.146614 | 0.433911  |                       |           |           |           |
| C                              | -1.856295 | 1.504217  | -0.514942 |                       |           |           |           |
| <b>(1R,2S,3S,4R)-3an_conf8</b> |           |           |           |                       |           |           |           |
| C                              | -1.310097 | 2.153695  | -1.631448 | 0 imaginary frequency |           |           |           |
| C                              | -2.162907 | 2.268704  | 0.617980  | C                     | 0.719124  | -1.723284 | 0.502869  |
| C                              | -1.068522 | 3.526947  | -1.616220 | C                     | -0.629303 | -1.414998 | 0.739283  |
| C                              | -1.926249 | 3.644186  | 0.633718  | C                     | -1.176337 | -1.663913 | 1.991272  |
| C                              | -1.375997 | 4.277516  | -0.480710 | C                     | -0.355837 | -2.186793 | 3.001086  |
| C                              | -4.492074 | -0.412104 | -0.289253 | C                     | 0.987816  | -2.464487 | 2.751189  |
| O                              | -4.711169 | 0.241037  | -1.281725 | C                     | 1.549948  | -2.241638 | 1.488436  |
| C                              | -3.628765 | -3.078254 | -0.331774 | C                     | -0.051015 | -0.994408 | -1.518586 |
| C                              | -4.296142 | -4.101947 | 0.200157  | N                     | 1.041997  | -1.449405 | -0.835209 |
| H                              | -1.512448 | -0.754877 | 2.770214  | C                     | 2.343448  | -1.652555 | -1.426295 |
| H                              | -0.132265 | 0.369434  | 4.509423  | C                     | 3.415733  | -0.720814 | -0.897363 |
| H                              | 1.996870  | 1.480883  | 3.903132  | C                     | 4.756279  | -1.027436 | -1.161821 |
| H                              | 2.818197  | 1.460556  | 1.544506  | C                     | 3.112707  | 0.435720  | -0.173390 |
| H                              | 2.348565  | 0.585916  | -2.259853 | C                     | 5.776766  | -0.187633 | -0.720935 |



|                                 |           |           |           |   |           |           |           |
|---------------------------------|-----------|-----------|-----------|---|-----------|-----------|-----------|
| C                               | 1.308289  | 3.497128  | 0.692642  | C | 0.368438  | 1.845700  | 3.019271  |
| C                               | -3.909351 | 1.750361  | -0.179869 | C | 1.523254  | 2.280974  | 2.368800  |
| O                               | -4.340849 | 2.621395  | 0.536339  | C | 1.926834  | 1.718075  | 1.151249  |
| C                               | -5.020215 | -0.790096 | -0.651609 | C | 0.335669  | -0.937087 | -0.741100 |
| C                               | -5.384591 | -1.436714 | -1.759068 | N | 1.318495  | -0.003373 | -0.571786 |
| H                               | -2.151334 | -1.187128 | 2.427479  | C | 2.451198  | 0.158136  | -1.455348 |
| H                               | -0.647712 | -2.025254 | 4.214116  | C | 3.749453  | -0.341830 | -0.854889 |
| H                               | 1.700985  | -2.632307 | 3.706002  | C | 4.946768  | 0.329909  | -1.119245 |
| H                               | 2.593593  | -2.424124 | 1.382742  | C | 3.773726  | -1.488165 | -0.053218 |
| H                               | 2.567106  | -2.789953 | -1.148748 | C | 6.153012  | -0.142102 | -0.600053 |
| H                               | 2.100731  | -1.672986 | -2.443699 | C | 4.978196  | -1.958347 | 0.469596  |
| H                               | 4.901054  | -2.067546 | -1.724428 | C | 6.171436  | -1.287334 | 0.196449  |
| H                               | 2.046143  | 0.670586  | -0.011067 | O | 0.274487  | -1.741913 | -1.653936 |
| H                               | 6.750982  | -0.541939 | -1.084478 | C | -0.698568 | -0.761388 | 0.371478  |
| H                               | 3.892471  | 2.185680  | 0.635257  | C | -2.029250 | -0.260557 | -0.303594 |
| H                               | 6.253218  | 1.594016  | 0.102905  | C | -1.095173 | -2.081783 | 1.084553  |
| H                               | -1.926901 | 0.803130  | -1.510833 | C | -3.101673 | -0.817391 | 0.623507  |
| H                               | -2.556544 | -2.641289 | -0.575844 | C | -2.618890 | -2.266705 | 0.901575  |
| H                               | -2.702658 | -1.422251 | -1.871416 | C | -2.038084 | 1.213628  | -0.623387 |
| H                               | -2.916652 | 0.741040  | 1.382143  | C | -1.383587 | 1.654088  | -1.782300 |
| H                               | -3.797845 | -1.299374 | 0.971646  | C | -2.618063 | 2.166110  | 0.222343  |
| H                               | -0.221875 | 2.183523  | -2.052225 | C | -1.290581 | 3.013642  | -2.078294 |
| H                               | -0.893897 | 1.323757  | 2.115942  | C | -2.532714 | 3.526886  | -0.075927 |
| H                               | 1.529183  | 3.831263  | -1.430859 | C | -1.863225 | 3.955569  | -1.222354 |
| H                               | 0.861250  | 2.949642  | 2.734340  | C | -4.495103 | -0.772254 | 0.069176  |
| H                               | 2.076263  | 4.221655  | 0.970627  | O | -4.776770 | -0.317683 | -1.014135 |
| H                               | -4.113121 | 1.765648  | -1.276339 | C | -2.936551 | -3.192234 | -0.245033 |
| H                               | -5.777131 | -0.206382 | -0.112293 | C | -3.854998 | -4.157372 | -0.195178 |
| H                               | -6.412997 | -1.379367 | -2.123823 | H | -1.331182 | 0.496380  | 2.970618  |
| H                               | -4.687924 | -2.049712 | -2.337102 | H | 0.081577  | 2.294288  | 3.971567  |
|                                 |           |           |           | H | 2.131299  | 3.068859  | 2.817066  |
|                                 |           |           |           | H | 2.837867  | 2.048124  | 0.649845  |
|                                 |           |           |           | H | 2.214556  | -0.404271 | -2.370724 |
|                                 |           |           |           | H | 2.544782  | 1.219415  | -1.730829 |
|                                 |           |           |           | H | 4.932645  | 1.232224  | -1.735802 |
|                                 |           |           |           | H | 2.842891  | -2.018989 | 0.164709  |
| <b>(1R,2S,3S,4R)-3an_conf10</b> |           |           |           |   |           |           |           |
| 0 imaginary frequency           |           |           |           |   |           |           |           |
| C                               | 1.124996  | 0.717920  | 0.616561  |   |           |           |           |
| C                               | -0.046918 | 0.277771  | 1.247967  |   |           |           |           |
| C                               | -0.426573 | 0.834688  | 2.459578  |   |           |           |           |

|                                 |           |           |           |   |           |           |           |
|---------------------------------|-----------|-----------|-----------|---|-----------|-----------|-----------|
| H                               | 7.081008  | 0.391958  | -0.813321 | C | -0.675728 | -0.776837 | 0.299530  |
| H                               | 4.984551  | -2.853778 | 1.094074  | C | -1.980948 | -0.278551 | -0.422967 |
| H                               | 7.113567  | -1.654857 | 0.607305  | C | -1.097421 | -2.106426 | 0.974737  |
| H                               | -2.110609 | -0.804927 | -1.258302 | C | -3.086533 | -0.817487 | 0.487418  |
| H                               | -0.847724 | -2.002554 | 2.151073  | C | -2.622165 | -2.273123 | 0.757337  |
| H                               | -0.538277 | -2.936956 | 0.676043  | C | -1.983195 | 1.192116  | -0.758197 |
| H                               | -3.114481 | -0.281168 | 1.588830  | C | -1.281571 | 1.625525  | -1.892607 |
| H                               | -3.087620 | -2.659682 | 1.814237  | C | -2.607703 | 2.147494  | 0.052255  |
| H                               | -0.947003 | 0.917620  | -2.463549 | C | -1.184319 | 2.982551  | -2.196438 |
| H                               | -3.141820 | 1.849587  | 1.127041  | C | -2.517571 | 3.506273  | -0.255507 |
| H                               | -0.775290 | 3.337806  | -2.984569 | C | -1.800151 | 3.928185  | -1.374578 |
| H                               | -2.991785 | 4.256411  | 0.594157  | C | -4.444816 | -0.709670 | -0.143185 |
| H                               | -1.794604 | 5.020436  | -1.452405 | O | -5.403358 | -0.220986 | 0.406572  |
| H                               | -5.285867 | -1.202825 | 0.725035  | C | -2.916333 | -3.212265 | -0.384630 |
| H                               | -2.356388 | -3.044537 | -1.164752 | C | -3.792029 | -4.215257 | -0.320479 |
| H                               | -4.052281 | -4.800636 | -1.056335 | H | -1.421818 | 0.446912  | 2.886213  |
| H                               | -4.439182 | -4.338818 | 0.712964  | H | -0.077138 | 2.259794  | 3.950370  |
|                                 |           |           |           | H | 1.998757  | 3.078569  | 2.875819  |
|                                 |           |           |           | H | 2.800476  | 2.086673  | 0.728031  |
| <b>(1R,2S,3S,4R)-3an_conf11</b> |           |           |           | H | 2.305951  | -0.317306 | -2.349773 |
| 0 imaginary frequency           |           |           |           | H | 2.615585  | 1.284447  | -1.641851 |
| C                               | 1.114373  | 0.726720  | 0.624626  | H | 2.924052  | -2.196592 | -0.201811 |
| C                               | -0.072670 | 0.262785  | 1.209750  | H | 4.937749  | 1.464382  | -1.242249 |
| C                               | -0.505528 | 0.804152  | 2.410539  | H | 5.024856  | -3.072644 | 0.789146  |
| C                               | 0.251627  | 1.823818  | 3.005821  | H | 7.046093  | 0.585773  | -0.260546 |
| C                               | 1.421198  | 2.283617  | 2.400559  | H | 7.094296  | -1.685732 | 0.760450  |
| C                               | 1.878381  | 1.736886  | 1.194425  | H | -2.030501 | -0.838367 | -1.371726 |
| C                               | 0.402619  | -0.928721 | -0.774431 | H | -0.867913 | -2.057584 | 2.046993  |
| N                               | 1.362359  | 0.018476  | -0.561405 | H | -0.542405 | -2.956878 | 0.554115  |
| C                               | 2.518323  | 0.213511  | -1.410230 | H | -3.112508 | -0.274193 | 1.443873  |
| C                               | 3.797266  | -0.309091 | -0.789843 | H | -3.114312 | -2.658339 | 1.660693  |
| C                               | 3.829920  | -1.583803 | -0.211926 | H | -0.811346 | 0.885681  | -2.547201 |
| C                               | 4.960272  | 0.465062  | -0.800156 | H | -3.172564 | 1.835498  | 0.933389  |
| C                               | 5.009876  | -2.076584 | 0.342593  | H | -0.632072 | 3.302389  | -3.082185 |
| C                               | 6.143929  | -0.028815 | -0.248054 | H | -3.010991 | 4.238758  | 0.386199  |
| C                               | 6.170713  | -1.299767 | 0.325068  | H | -1.727803 | 4.991328  | -1.611338 |
| O                               | 0.386179  | -1.726315 | -1.695900 |   |           |           |           |

|                                 |           |           |           |                                 |           |           |           |
|---------------------------------|-----------|-----------|-----------|---------------------------------|-----------|-----------|-----------|
| H                               | -4.530840 | -1.106682 | -1.181076 | C                               | -4.509776 | -0.653718 | -1.612271 |
| H                               | -2.343782 | -3.054162 | -1.307518 | C                               | -4.034248 | -0.822747 | -2.847131 |
| H                               | -3.962152 | -4.877922 | -1.172680 | H                               | -2.151953 | -1.234517 | 2.649132  |
| H                               | -4.367648 | -4.408517 | 0.590544  | H                               | -0.564756 | -1.712478 | 4.506892  |
| <b>(1R,2S,3S,4R)-3an_conf12</b> |           |           |           | H                               | 1.835284  | -2.114573 | 4.037645  |
| 0 imaginary frequency           |           |           |           | H                               | 2.698977  | -2.072286 | 1.695654  |
| C                               | 0.742304  | -1.600457 | 0.886714  | H                               | 2.650314  | -2.784551 | -0.746414 |
| C                               | -0.612686 | -1.339578 | 1.134768  | H                               | 2.075083  | -1.935304 | -2.191266 |
| C                               | -1.093434 | -1.397553 | 2.435402  | H                               | 2.008109  | 0.661699  | 0.131341  |
| C                               | -0.199391 | -1.672742 | 3.479693  | H                               | 4.839100  | -1.910655 | -1.855849 |
| C                               | 1.150839  | -1.901814 | 3.214455  | H                               | 3.773659  | 2.365584  | 0.436151  |
| C                               | 1.646031  | -1.877750 | 1.905007  | H                               | 6.608247  | -0.197104 | -1.555875 |
| C                               | -0.168309 | -1.321285 | -1.187621 | H                               | 6.082788  | 1.952013  | -0.403910 |
| N                               | 0.986839  | -1.559304 | -0.495216 | H                               | -1.963191 | 0.478132  | -1.478040 |
| C                               | 2.264738  | -1.820023 | -1.114401 | H                               | -2.657341 | -2.700693 | 0.317409  |
| C                               | 3.304697  | -0.740288 | -0.887925 | H                               | -2.547246 | -2.376346 | -1.416035 |
| C                               | 3.015925  | 0.465015  | -0.243133 | H                               | -3.071425 | 0.278321  | 1.370864  |
| C                               | 4.606429  | -0.968037 | -1.353431 | H                               | -4.526365 | -1.316219 | 0.401206  |
| C                               | 4.013920  | 1.428787  | -0.071060 | H                               | -1.184710 | 1.391128  | 2.124123  |
| C                               | 5.599400  | -0.006382 | -1.184710 | H                               | -0.242913 | 1.838493  | -2.056063 |
| C                               | 5.305420  | 1.197975  | -0.540191 | H                               | 0.448708  | 3.162769  | 2.681874  |
| O                               | -0.267826 | -1.269079 | -2.400478 | H                               | 1.380648  | 3.635384  | -1.499286 |
| C                               | -1.296205 | -1.074269 | -0.183802 | H                               | 1.733276  | 4.301813  | 0.877406  |
| C                               | -1.784596 | 0.393294  | -0.392344 | H                               | -3.977443 | 1.946931  | -1.067599 |
| C                               | -2.582535 | -1.899335 | -0.427974 | H                               | -5.518791 | -0.240302 | -1.494943 |
| C                               | -3.161224 | 0.372327  | 0.279406  | H                               | -4.642274 | -0.563347 | -3.717433 |
| C                               | -3.786642 | -0.930057 | -0.312836 | H                               | -3.030986 | -1.213018 | -3.042152 |
| C                               | -0.820898 | 1.487362  | -0.008318 | <b>(1R,2S,3S,4R)-3an_conf13</b> |           |           |           |
| C                               | -0.617617 | 1.872068  | 1.324498  | 0 imaginary frequency           |           |           |           |
| C                               | -0.090597 | 2.134025  | -1.014540 | C                               | -1.099535 | 0.794418  | -1.559776 |
| C                               | 0.301507  | 2.873283  | 1.639614  | C                               | 0.265791  | 1.016998  | -1.328006 |
| C                               | 0.822025  | 3.141574  | -0.701721 | C                               | 0.808894  | 2.269544  | -1.575027 |
| C                               | 1.021581  | 3.512275  | 0.628116  | C                               | -0.031121 | 3.294350  | -2.033968 |
| C                               | -3.923612 | 1.636553  | 0.001473  | C                               | -1.391445 | 3.059536  | -2.235515 |
| O                               | -4.437293 | 2.311985  | 0.861386  | C                               | -1.952316 | 1.797178  | -2.003290 |



|   |           |           |           |   |                                 |           |           |
|---|-----------|-----------|-----------|---|---------------------------------|-----------|-----------|
| C | -2.300339 | 1.901542  | 0.448232  | H | -2.422861                       | 4.530917  | -2.426118 |
| C | -1.794419 | 2.259350  | -0.987178 |   |                                 |           |           |
| C | -3.019869 | -0.566110 | 0.366383  |   |                                 |           |           |
| C | -3.120906 | -1.752041 | 1.105239  |   | <b>(1R,2S,3S,4R)-3an_conf15</b> |           |           |
| C | -3.891953 | -0.375840 | -0.712765 |   | 0 imaginary frequency           |           |           |
| C | -4.055663 | -2.729857 | 0.768948  | C | -1.069345                       | -1.423666 | -0.281822 |
| C | -4.827349 | -1.354472 | -1.054735 | C | 0.185265                        | -1.257807 | 0.322245  |
| C | -4.909396 | -2.536215 | -0.318321 | C | 0.749145                        | -2.310549 | 1.029843  |
| C | -1.858290 | 2.824281  | 1.560780  | C | 0.055212                        | -3.526780 | 1.104001  |
| O | -1.723079 | 2.477824  | 2.709827  | C | -1.185446                       | -3.675465 | 0.483609  |
| C | -1.064239 | 3.571043  | -1.111499 | C | -1.775458                       | -2.618322 | -0.220354 |
| C | -1.485997 | 4.589132  | -1.862459 | C | -0.517942                       | 0.746371  | -0.707064 |
| H | -1.725497 | -2.118952 | -1.594010 | N | -1.451499                       | -0.227199 | -0.907932 |
| H | -0.551549 | -4.317996 | -1.663061 | C | -2.713450                       | -0.019512 | -1.586959 |
| H | 1.611331  | -4.625434 | -0.494084 | C | -3.888957                       | 0.034912  | -0.633583 |
| H | 2.666752  | -2.734897 | 0.750956  | C | -3.821984                       | 0.811910  | 0.528970  |
| H | 2.613024  | 0.956103  | 2.105099  | C | -5.058093                       | -0.678372 | -0.910461 |
| H | 2.821445  | -0.796492 | 2.318051  | C | -4.909615                       | 0.874808  | 1.398536  |
| H | 2.945694  | 1.404436  | -0.755983 | C | -6.149602                       | -0.613100 | -0.042375 |
| H | 5.053344  | -1.349763 | 1.796799  | C | -6.076919                       | 0.162383  | 1.114337  |
| H | 4.888043  | 1.462681  | -2.299435 | O | -0.608508                       | 1.896265  | -1.107824 |
| H | 7.006124  | -1.282573 | 0.259373  | C | 0.657845                        | 0.152058  | 0.074353  |
| H | 6.926678  | 0.122131  | -1.796065 | C | 1.949299                        | 0.348872  | -0.792141 |
| H | -1.692826 | 0.295254  | 1.783688  | C | 0.954500                        | 0.974633  | 1.339231  |
| H | -1.497582 | 0.410006  | -2.113887 | C | 2.324521                        | 1.822562  | -0.532386 |
| H | -0.001020 | 1.339793  | -1.923846 | C | 1.832136                        | 2.182306  | 0.910228  |
| H | -3.398070 | 2.030422  | 0.478480  | C | 3.023556                        | -0.653780 | -0.432084 |
| H | -2.667450 | 2.320076  | -1.652380 | C | 3.108109                        | -1.849924 | -1.156632 |
| H | -2.447703 | -1.910761 | 1.951615  | C | 3.902915                        | -0.459938 | 0.640418  |
| H | -3.849116 | 0.543587  | -1.300779 | C | 4.034171                        | -2.833454 | -0.813251 |
| H | -4.117643 | -3.646866 | 1.358151  | C | 4.829267                        | -1.444624 | 0.989752  |
| H | -5.496998 | -1.188821 | -1.900863 | C | 4.895308                        | -2.635906 | 0.267432  |
| H | -5.641259 | -3.300654 | -0.585846 | C | 1.864876                        | 2.735327  | -1.650675 |
| H | -1.751582 | 3.896192  | 1.283065  | O | 1.875709                        | 3.939986  | -1.586468 |
| H | -0.121543 | 3.656469  | -0.560781 | C | 1.107966                        | 3.492312  | 1.076508  |
| H | -0.909493 | 5.514306  | -1.941301 | C | 1.471660                        | 4.430344  | 1.951286  |
|   |           |           |           | H | 1.719153                        | -2.197731 | 1.519574  |

|                                 |           |           |           |   |           |           |           |
|---------------------------------|-----------|-----------|-----------|---|-----------|-----------|-----------|
| H                               | 0.489889  | -4.362954 | 1.653715  | C | -3.072717 | -0.586052 | -1.240368 |
| H                               | -1.713163 | -4.628529 | 0.551672  | C | -3.978691 | 0.159657  | -0.478371 |
| H                               | -2.752430 | -2.728745 | -0.692997 | C | -3.004523 | -1.972339 | -1.052307 |
| H                               | -2.619038 | 0.929998  | -2.133255 | C | -4.807712 | -0.469324 | 0.452096  |
| H                               | -2.860076 | -0.820989 | -2.325365 | C | -3.832403 | -2.602195 | -0.123169 |
| H                               | -2.912189 | 1.376350  | 0.752715  | C | -4.738919 | -1.851541 | 0.628485  |
| H                               | -5.111754 | -1.293104 | -1.812562 | O | 0.235050  | -1.483265 | -2.170409 |
| H                               | -4.847269 | 1.484341  | 2.302026  | C | 1.363380  | 0.338986  | -0.970341 |
| H                               | -7.057038 | -1.176297 | -0.268583 | C | 1.657648  | -0.460737 | 0.347426  |
| H                               | -6.927719 | 0.210653  | 1.796544  | C | 2.715838  | 0.314181  | -1.726806 |
| H                               | 1.698770  | 0.195716  | -1.853462 | C | 3.102823  | -0.081234 | 0.641016  |
| H                               | 1.512621  | 0.334392  | 2.037914  | C | 3.792029  | -0.217949 | -0.753171 |
| H                               | 0.028624  | 1.283461  | 1.846832  | C | 0.619832  | -0.269814 | 1.424556  |
| H                               | 3.422469  | 1.931807  | -0.577400 | C | -0.548531 | -1.041307 | 1.371401  |
| H                               | 2.710505  | 2.223719  | 1.569675  | C | 0.741273  | 0.695520  | 2.431480  |
| H                               | 2.428984  | -2.012804 | -1.997509 | C | -1.581922 | -0.841337 | 2.286425  |
| H                               | 3.873369  | 0.466430  | 1.217824  | C | -0.288356 | 0.893408  | 3.352530  |
| H                               | 4.083406  | -3.758040 | -1.391686 | C | -1.455481 | 0.131925  | 3.278716  |
| H                               | 5.504541  | -1.275823 | 1.830749  | C | 3.759344  | -0.906009 | 1.709105  |
| H                               | 5.620259  | -3.404841 | 0.540769  | O | 3.219329  | -1.823568 | 2.280012  |
| H                               | 1.594403  | 2.224961  | -2.603204 | C | 4.229684  | -1.645380 | -0.987572 |
| H                               | 0.205716  | 3.631036  | 0.472665  | C | 3.578405  | -2.579668 | -1.681683 |
| H                               | 0.890281  | 5.347259  | 2.076629  | H | 2.388213  | 2.888564  | 0.126925  |
| H                               | 2.366934  | 4.314526  | 2.570824  | H | 0.938937  | 4.886228  | 0.467085  |
|                                 |           |           |           | H | -1.452455 | 4.826046  | -0.181590 |
|                                 |           |           |           | H | -2.440260 | 2.786324  | -1.215950 |
|                                 |           |           |           | H | -2.634051 | 0.990604  | -2.653678 |
|                                 |           |           |           | H | -1.957716 | -0.597497 | -3.081092 |
|                                 |           |           |           | H | -4.047051 | 1.240249  | -0.623606 |
|                                 |           |           |           | H | -2.297922 | -2.558505 | -1.645024 |
|                                 |           |           |           | H | -5.515282 | 0.122707  | 1.035733  |
|                                 |           |           |           | H | -3.774567 | -3.684216 | 0.010272  |
|                                 |           |           |           | H | -5.390939 | -2.344658 | 1.352108  |
|                                 |           |           |           | H | 1.654864  | -1.525387 | 0.058896  |
|                                 |           |           |           | H | 2.968414  | 1.331907  | -2.050177 |
|                                 |           |           |           | H | 2.647562  | -0.307351 | -2.629505 |
| <b>(1R,2S,3S,4R)-3an_conf16</b> |           |           |           |   |           |           |           |
| 0 imaginary frequency           |           |           |           |   |           |           |           |
| C                               | -0.567023 | 1.698729  | -1.092900 |   |           |           |           |
| C                               | 0.781648  | 1.705695  | -0.703661 |   |           |           |           |
| C                               | 1.333466  | 2.853634  | -0.155041 |   |           |           |           |
| C                               | 0.517369  | 3.978652  | 0.032489  |   |           |           |           |
| C                               | -0.827017 | 3.944800  | -0.335270 |   |           |           |           |
| C                               | -1.393087 | 2.801127  | -0.913129 |   |           |           |           |
| C                               | 0.212249  | -0.359183 | -1.695629 |   |           |           |           |
| N                               | -0.875728 | 0.463608  | -1.685842 |   |           |           |           |
| C                               | -2.163478 | 0.085681  | -2.246444 |   |           |           |           |



|                                 |           |           |           |   |           |           |           |
|---------------------------------|-----------|-----------|-----------|---|-----------|-----------|-----------|
| H                               | 3.189300  | 0.972770  | 0.954282  | C | -1.332290 | 1.401990  | -1.984968 |
| H                               | 4.687531  | 0.417645  | -0.780674 | C | -2.581624 | 2.075128  | -0.035426 |
| H                               | -0.644261 | -1.813024 | 0.601807  | C | -1.219453 | 2.734652  | -2.378320 |
| H                               | 1.644470  | 1.305728  | 2.500532  | C | -2.476290 | 3.409319  | -0.432762 |
| H                               | -2.484344 | -1.453336 | 2.226281  | C | -1.789264 | 3.743507  | -1.599548 |
| H                               | -0.177437 | 1.649795  | 4.132034  | C | -4.479454 | -0.701569 | 0.003588  |
| H                               | -2.260995 | 0.290500  | 3.998226  | O | -5.388356 | -0.108414 | 0.534596  |
| H                               | 4.809345  | -0.627196 | 1.955226  | C | -3.198659 | -3.285892 | -0.067890 |
| H                               | 5.167015  | -1.923130 | -0.490012 | C | -2.534222 | -3.804010 | -1.101845 |
| H                               | 3.976772  | -3.594657 | -1.756822 | H | -1.468690 | 0.331389  | 2.962647  |
| H                               | 2.629167  | -2.378266 | -2.186378 | H | -0.193664 | 2.205414  | 3.997582  |
|                                 |           |           |           | H | 1.829440  | 3.111232  | 2.892204  |
| <b>(1R,2S,3S,4R)-3an_conf17</b> |           |           |           | H | 2.651413  | 2.137565  | 0.742751  |
| 0 imaginary frequency           |           |           |           | H | 2.238812  | -0.314265 | -2.305448 |
| C                               | 1.023355  | 0.707670  | 0.666321  | H | 2.469703  | 1.311337  | -1.621916 |
| C                               | -0.139524 | 0.199066  | 1.263662  | H | 4.784550  | 1.615307  | -1.261081 |
| C                               | -0.578265 | 0.726459  | 2.468778  | H | 2.975737  | -2.123797 | -0.128190 |
| C                               | 0.141603  | 1.780914  | 3.050099  | H | 6.947614  | 0.865152  | -0.290696 |
| C                               | 1.281833  | 2.288872  | 2.428307  | H | 5.130349  | -2.871094 | 0.852902  |
| C                               | 1.749140  | 1.753600  | 1.220839  | H | 7.124858  | -1.380621 | 0.772032  |
| C                               | 0.378715  | -0.994699 | -0.708234 | H | -2.101916 | -1.019864 | -1.271586 |
| N                               | 1.295889  | -0.003233 | -0.512215 | H | -0.811494 | -2.180965 | 2.081762  |
| C                               | 2.431940  | 0.239803  | -1.375186 | H | -0.642081 | -3.045787 | 0.549091  |
| C                               | 3.743111  | -0.205491 | -0.761747 | H | -3.091674 | -0.235702 | 1.525362  |
| C                               | 4.864545  | 0.627035  | -0.801238 | H | -3.096827 | -2.566814 | 1.921274  |
| C                               | 3.848449  | -1.465446 | -0.160939 | H | -0.897769 | 0.611823  | -2.604467 |
| C                               | 6.078560  | 0.205371  | -0.255442 | H | -3.122014 | 1.831507  | 0.881929  |
| C                               | 5.058684  | -1.886060 | 0.387795  | H | -0.691005 | 2.985806  | -3.300036 |
| C                               | 6.177605  | -1.051171 | 0.341086  | H | -2.933686 | 4.191479  | 0.176127  |
| O                               | 0.402850  | -1.806474 | -1.617884 | H | -1.704750 | 4.787586  | -1.906711 |
| C                               | -0.710698 | -0.863601 | 0.357589  | H | -4.619875 | -1.169841 | -0.997988 |
| C                               | -2.019026 | -0.388354 | -0.369846 | H | -4.248104 | -3.571076 | 0.074057  |
| C                               | -1.131811 | -2.189865 | 1.032276  | H | -3.025054 | -4.502267 | -1.784579 |
| C                               | -3.109862 | -0.837760 | 0.605955  | H | -1.491937 | -3.549701 | -1.314148 |
| C                               | -2.673096 | -2.294701 | 0.945013  |   |           |           |           |
| C                               | -2.003854 | 1.056553  | -0.803093 |   |           |           |           |

### 3. References

- (1) (a) Xiao, J.-A.; Li, Y.-C.; Luo, Z.-J.; Cheng, X.-L.; Deng, Z.-X.; Chen, W.; Su, W.; Yang, H. *J. Org. Chem.* **2019**, *84*, 2297; (b) Xiao, J.-A.; Cheng, X.-L.; Li, Y.-C.; He, Y.-M.; Li, J.-L.; Liu, Z.-P.; Xia, P.-J.; Su, W.; Yang, H. *Org. Biomol. Chem.* **2019**, *17*, 103; (c) Wan, Q.; Chen, L.; Li, S.; Kang, Q.; Yuan, Y.; Du, Y. *Org. Lett.* **2020**, *22*, 9539.
- (2) Zhao, Y.; Truhlar, D. G. *Theor. Chem. Acc.* **2008**, *120*, 215.
- (3) (a) Weigend, F.; Ahlrichs, R. *Phys. Chem. Chem. Phys.* **2005**, *7*, 3297. (b) Weigend, F. *Phys. Chem. Chem. Phys.*, **2006**, *8*, 1057.
- (4) Marenich, A. V.; Cramer, C. J.; Truhlar, D. G. *J. Phys. Chem. B* **2009**, *113*, 6378.
- (5) Gaussian 16 Rev. A.03, Frisch, M. J.; Trucks, G. W.; Schlegel, H. B.; Scuseria, G. E.; Robb, M. A.; Cheeseman, J. R.; Scalmani, G.; Barone, V.; Petersson, G. A.; Nakatsuji, H.; Li, X.; Caricato, M.; Marenich, A. V.; Bloino, J.; Janesko, B. G.; Gomperts, R.; Mennucci, B.; Hratchian, H. P.; Ortiz, J. V.; Izmaylov, A. F.; Sonnenberg, J. L.; Williams; Ding, F.; Lipparini, F.; Egidi, F.; Goings, J.; Peng, B.; Petrone, A.; Henderson, T.; Ranasinghe, D.; Zakrzewski, V. G.; Gao, J.; Rega, N.; Zheng, G.; Liang, W.; Hada, M.; Ehara, M.; Toyota, K.; Fukuda, R.; Hasegawa, J.; Ishida, M.; Nakajima, T.; Honda, Y.; Kitao, O.; Nakai, H.; Vreven, T.; Throssell, K.; Montgomery Jr., J. A.; Peralta, J. E.; Ogliaro, F.; Bearpark, M. J.; Heyd, J. J.; Brothers, E. N.; Kudin, K. N.; Staroverov, V. N.; Keith, T. A.; Kobayashi, R.; Normand, J.; Raghavachari, K.; Rendell, A. P.; Burant, J. C.; Iyengar, S. S.; Tomasi, J.; Cossi, M.; Millam, J. M.; Klene, M.; Adamo, C.; Cammi, R.; Ochterski, J. W.; Martin, R. L.; Morokuma, K.; Farkas, O.; Foresman, J. B.; Fox, D. J., Gaussian Inc. Wallingford CT, 2016.
- (6) Grimme, S. *Chem. Eur. J.* **2012**, *18*, 9955.
- (7) Yanai, T.; Tew, D.; Handy, N. *Chem. Phys. Lett.* **2004**, *393*, 51.
- (8) (a) Bruhn, T.; Schaumlöffel, A.; Hemberger, Y.; Bringmann, G. SpecDis version 1.70, University of Würzburg, Germany, 2017, <https://specdis-software.jimdo.com>. (b) Bruhn, T.; Schaumlöffel, A.; Hemberger, Y.; Bringmann, G. *Chirality*, **2013**, *25*, 243. (c) Bruhn, T.; Pescitelli, G. *Chirality*, **2016**, *28*, 466.

## 4. NMR and HPLC Spectra

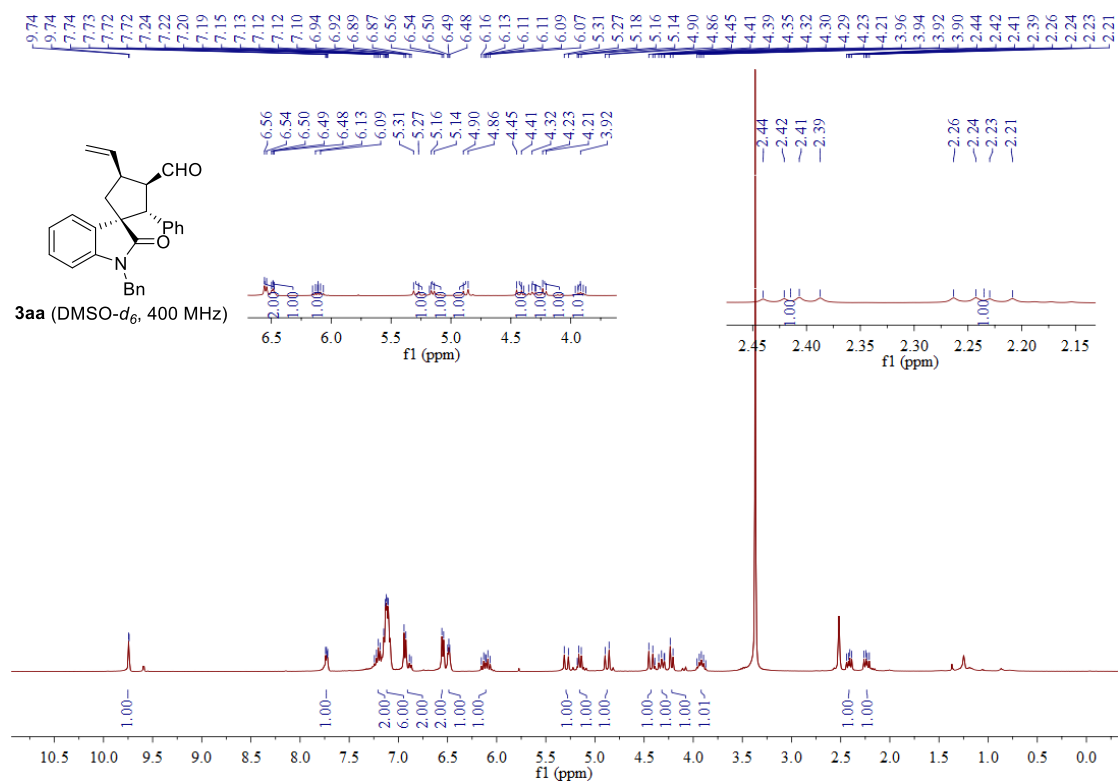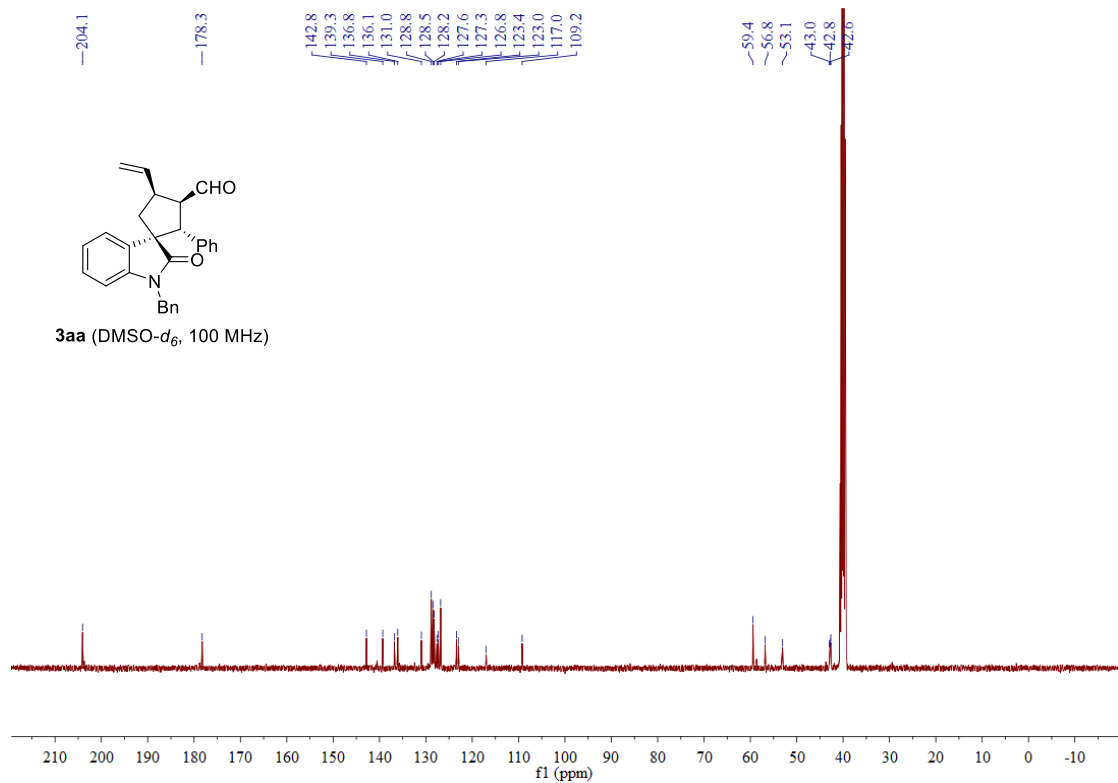

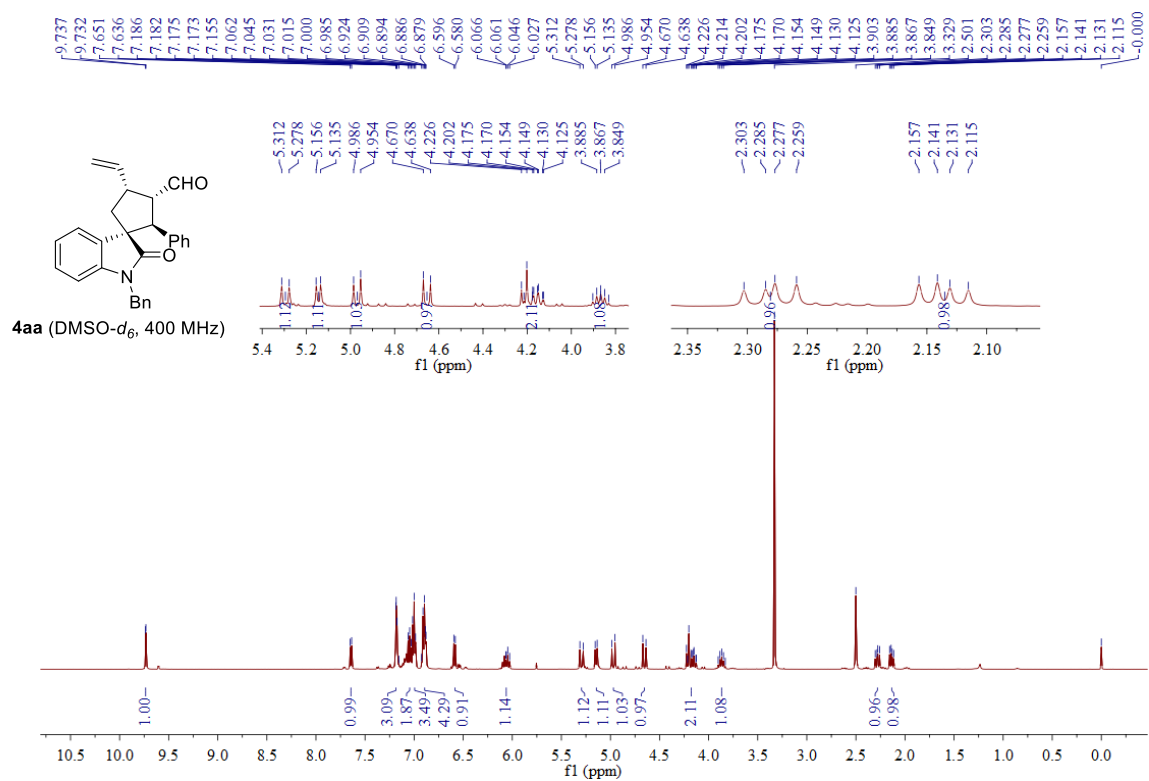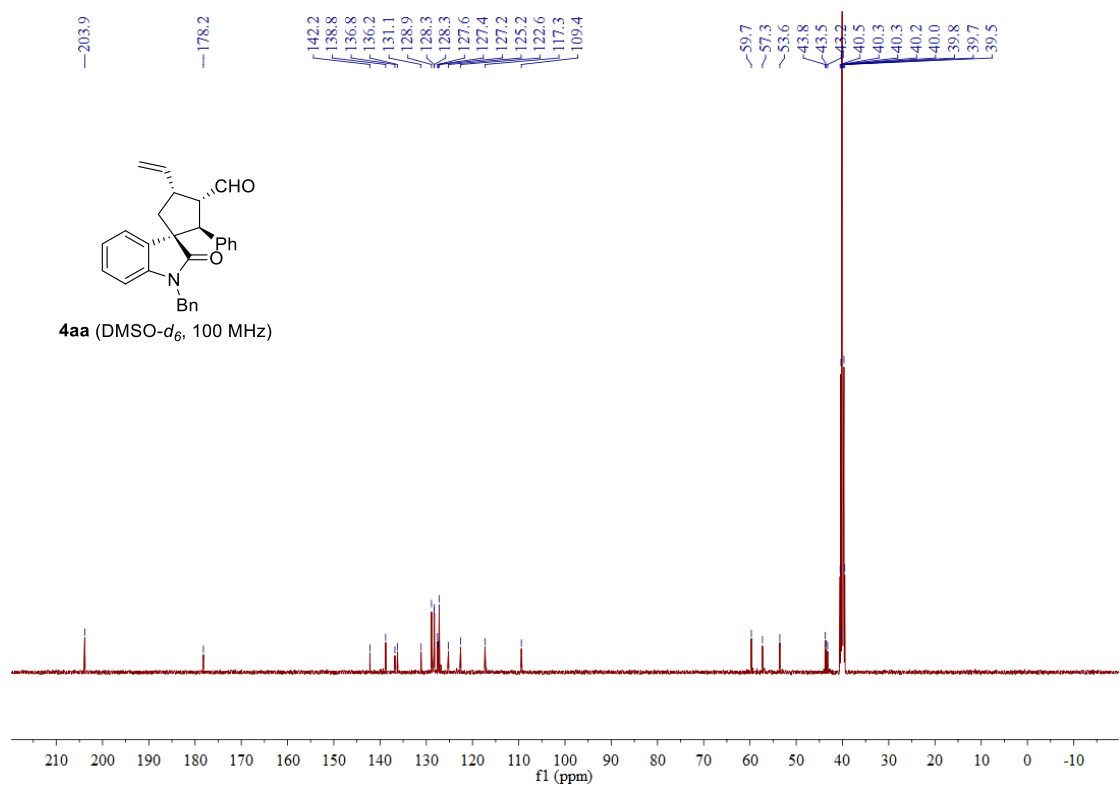

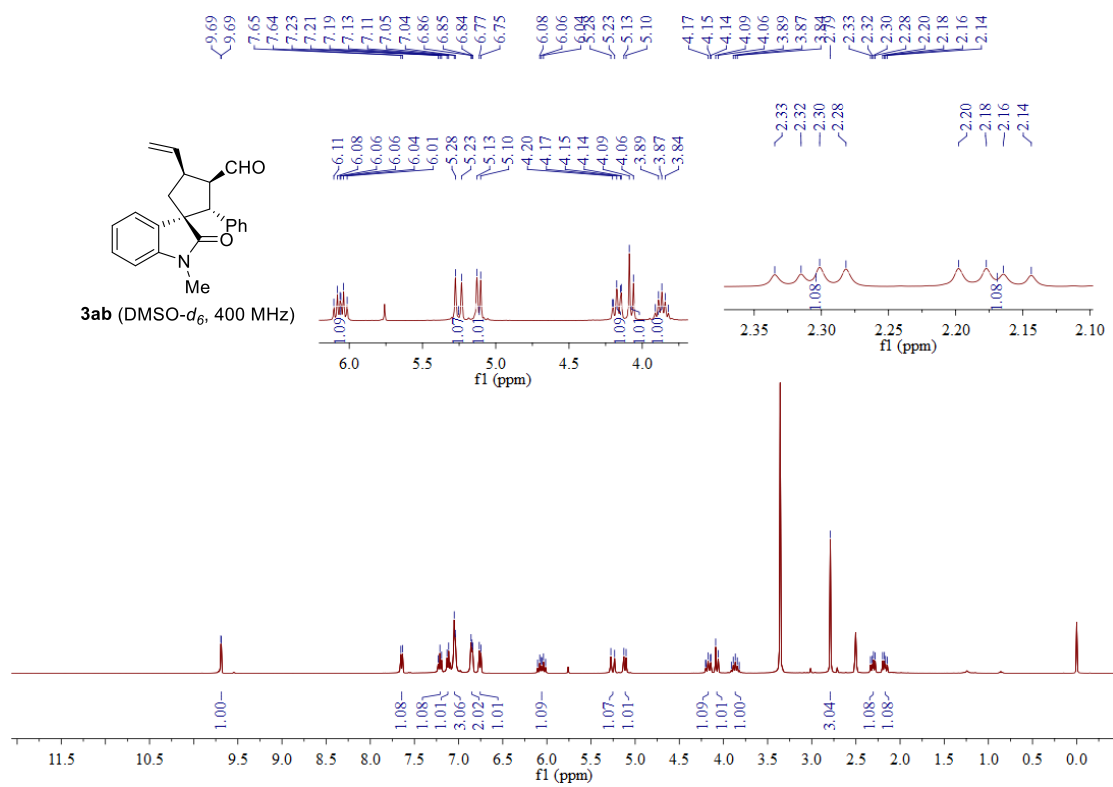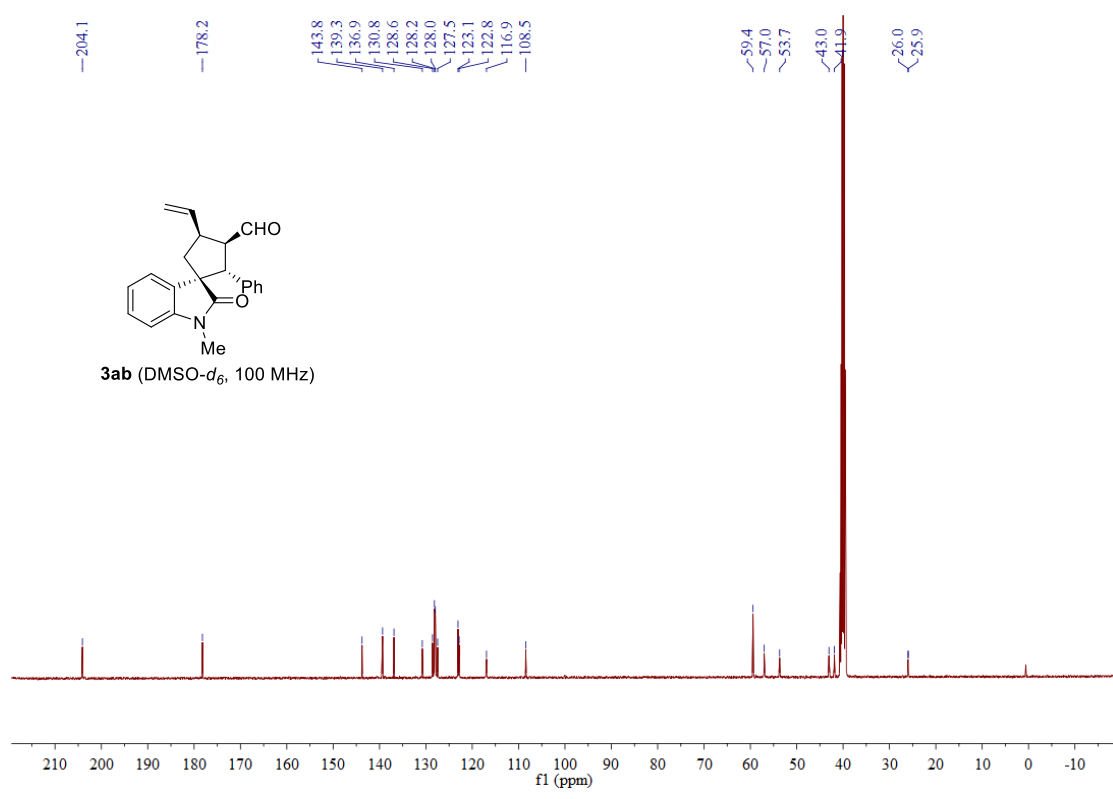

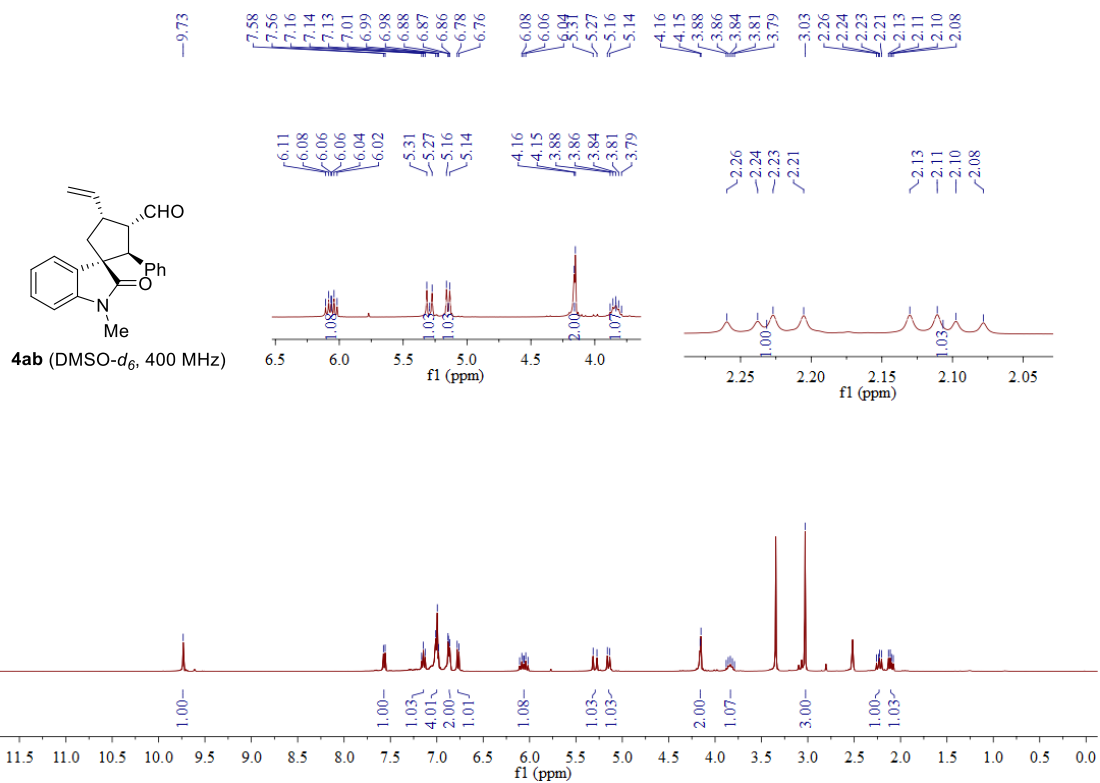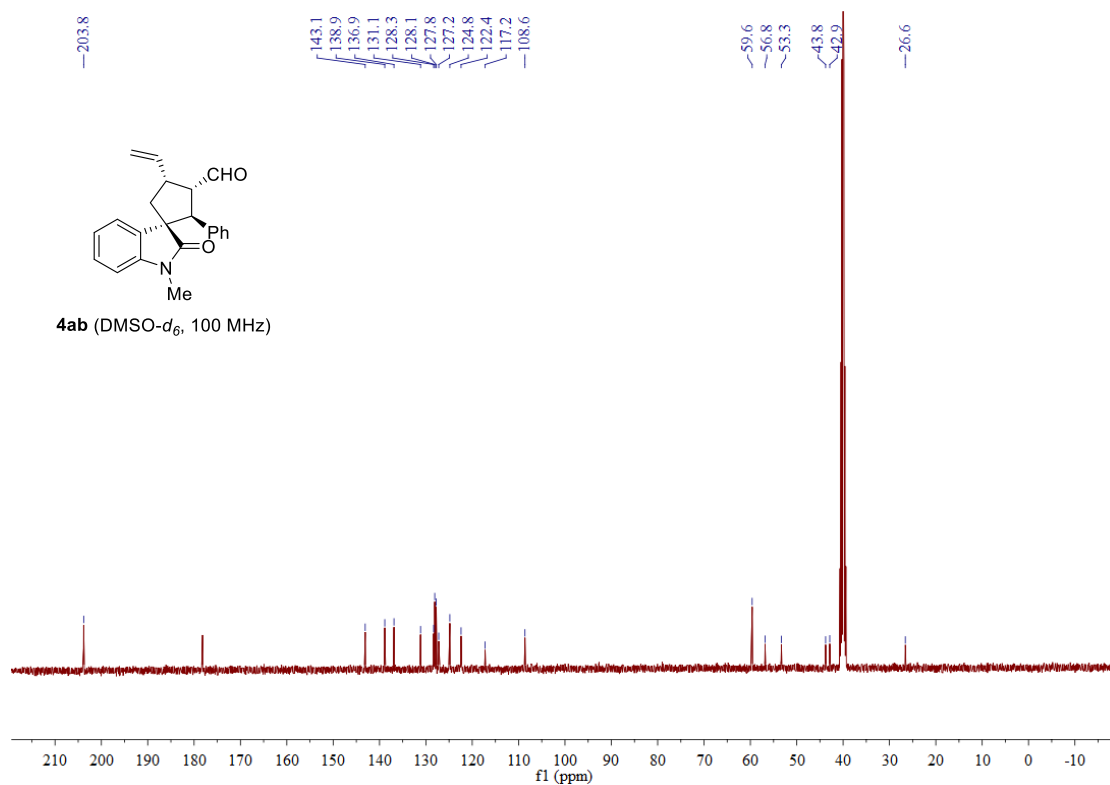

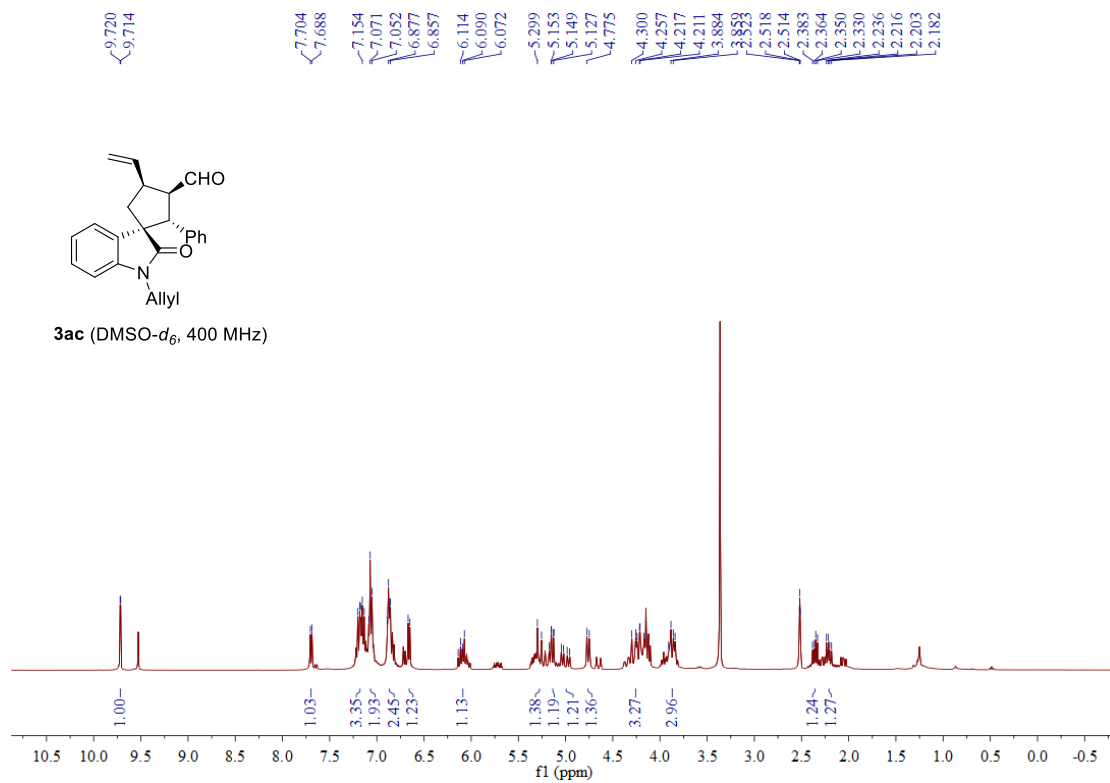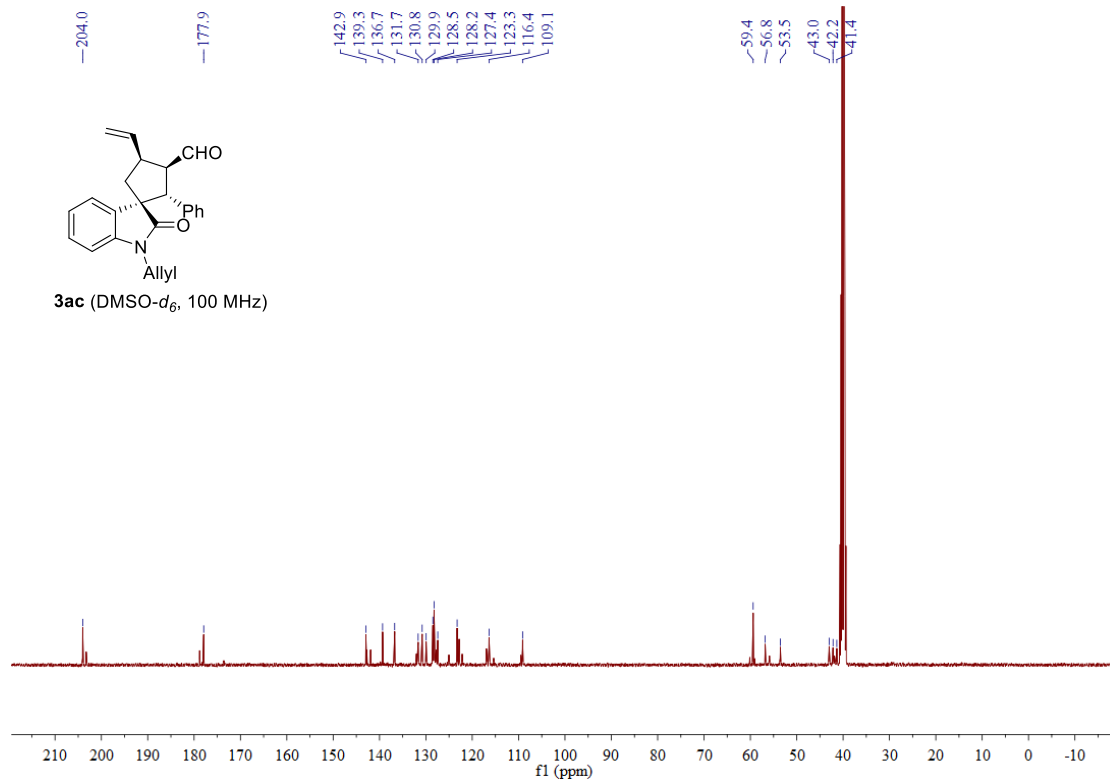

9.74  
7.64  
7.62  
7.15  
7.13  
7.11  
7.04  
7.02  
7.01  
7.00  
6.91  
6.90  
6.89  
6.70  
6.68  
6.11  
6.08  
6.06  
6.06  
6.04  
6.02  
5.66  
5.65  
5.64  
5.62  
5.61  
5.59  
5.32  
5.28  
5.16  
5.14  
4.94  
4.91  
4.59  
4.55  
4.38  
4.37  
4.34  
4.34  
4.33  
4.33  
4.18  
4.17  
4.12  
4.11  
4.08  
4.07  
3.89  
3.87  
3.84  
2.28  
2.26  
2.25  
2.22  
2.15  
2.13  
2.11  
2.09

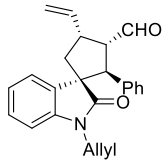

**4ac** (DMSO-*d*<sub>6</sub>, 400 MHz)

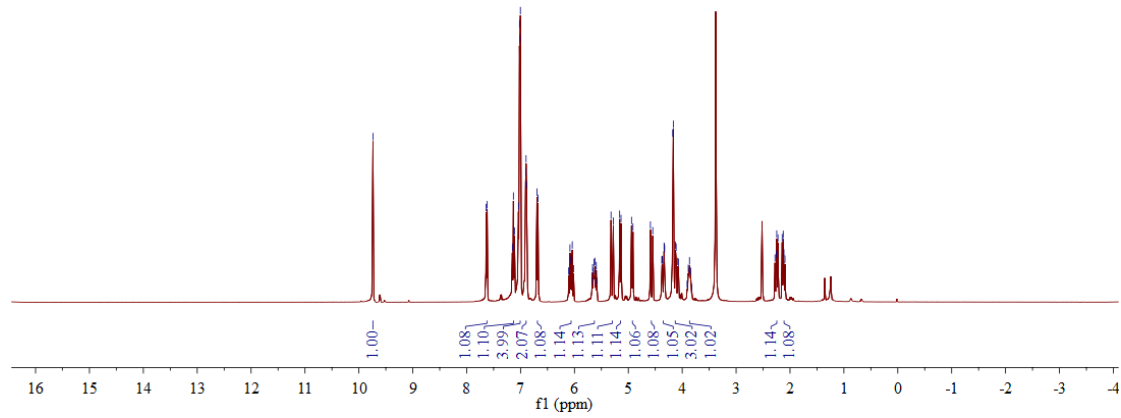

203.8  
177.8  
142.2  
138.8  
136.7  
131.8  
131.0  
128.3  
128.1  
127.3  
125.0  
122.4  
117.3  
116.7  
109.3  
59.6  
57.0  
53.5  
43.7  
43.1  
42.0

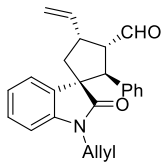

**4ac** (DMSO-*d*<sub>6</sub>, 100 MHz)

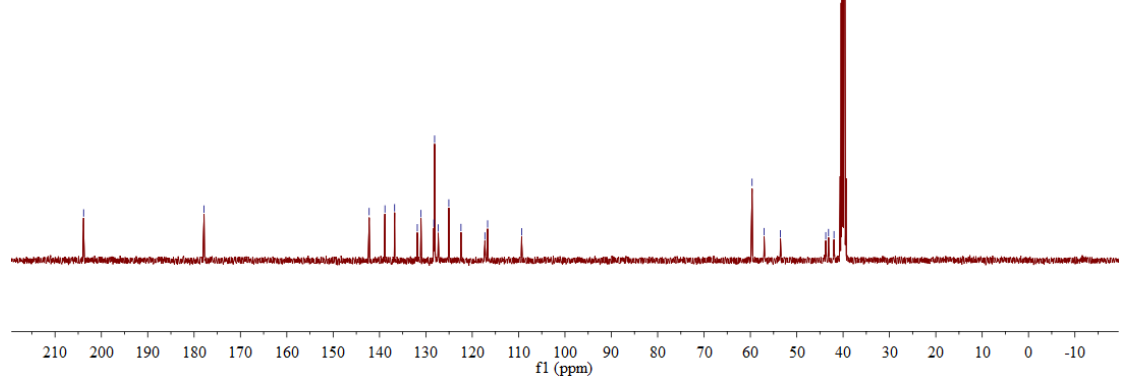



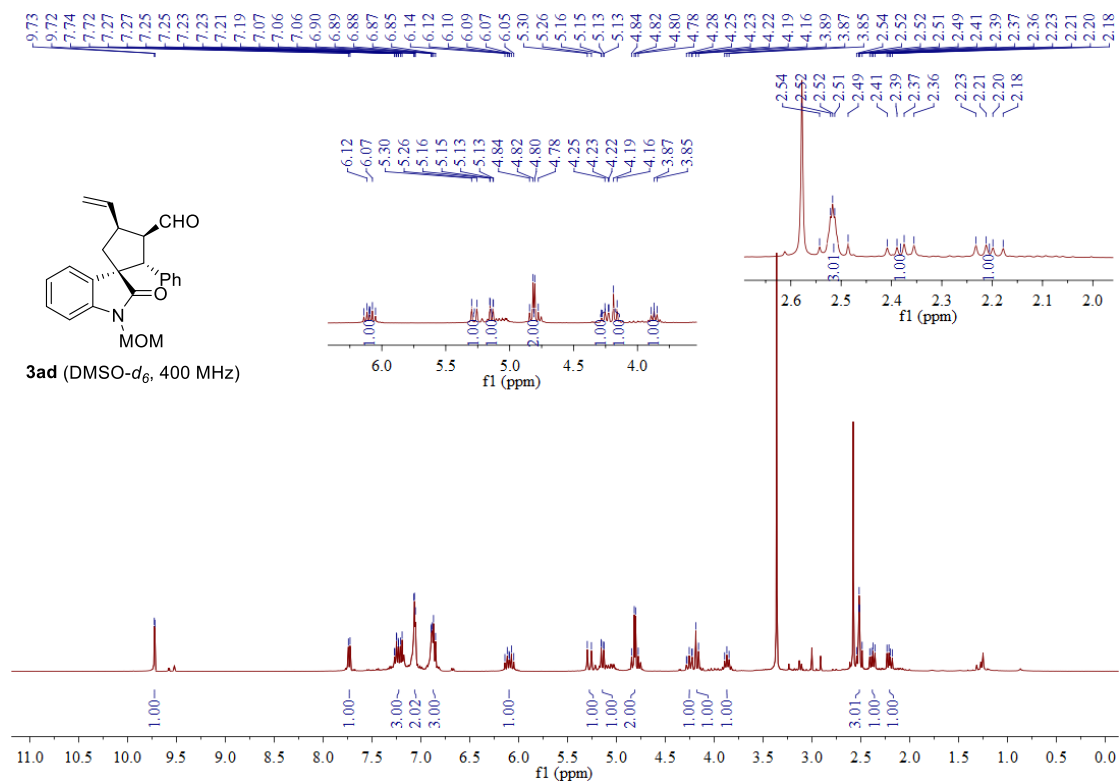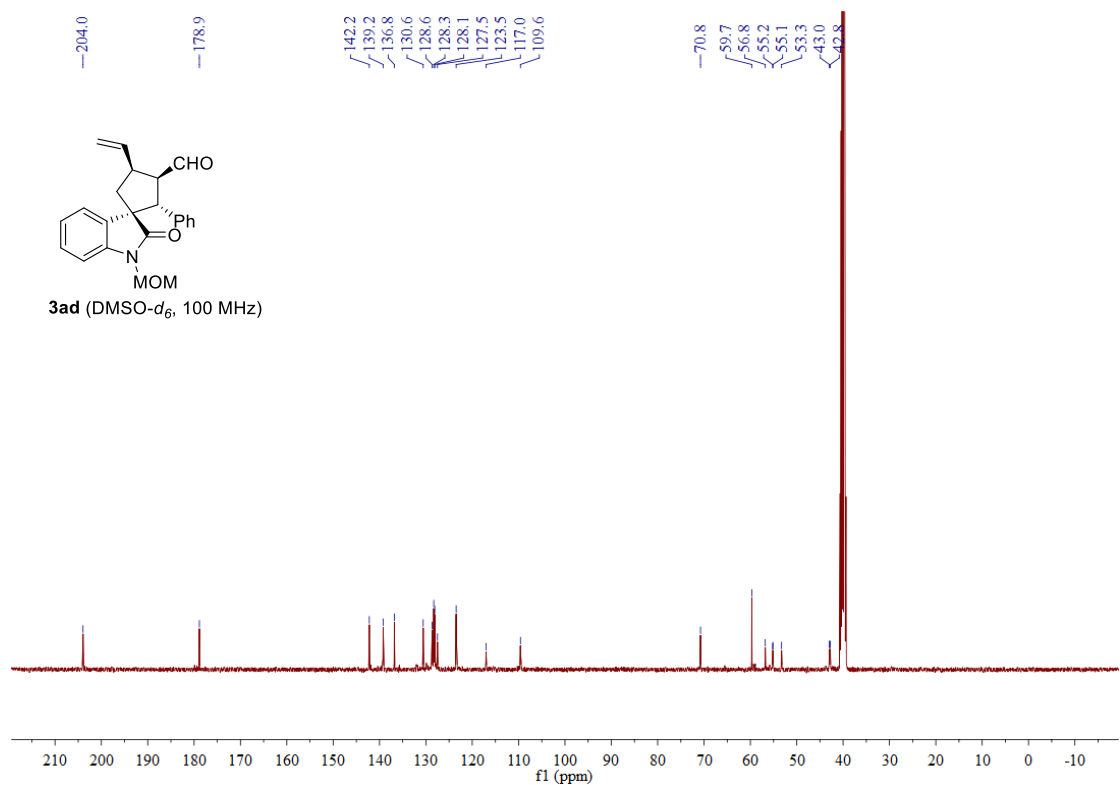

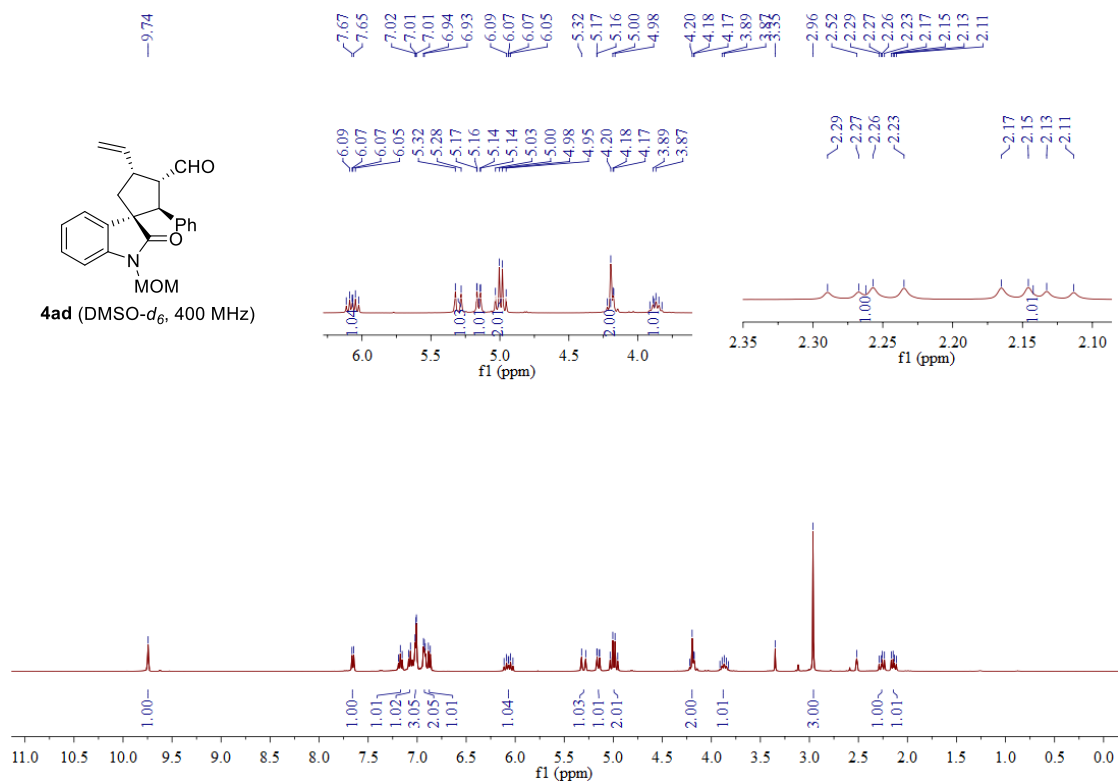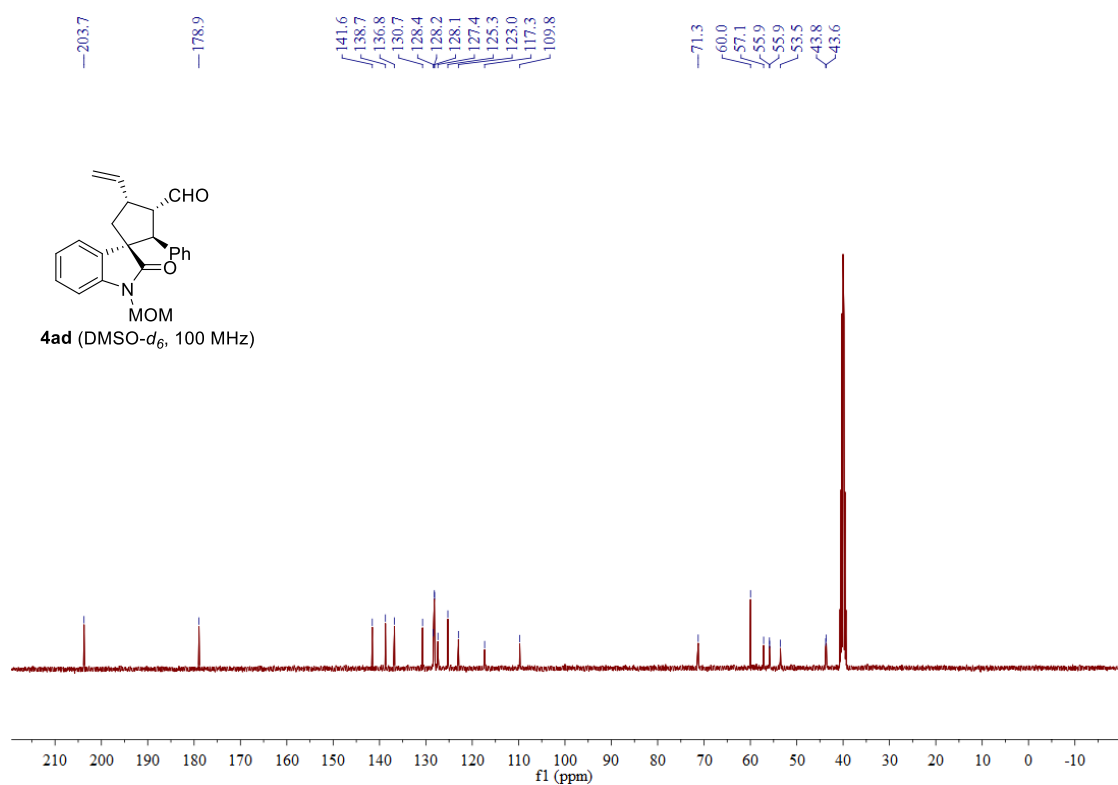

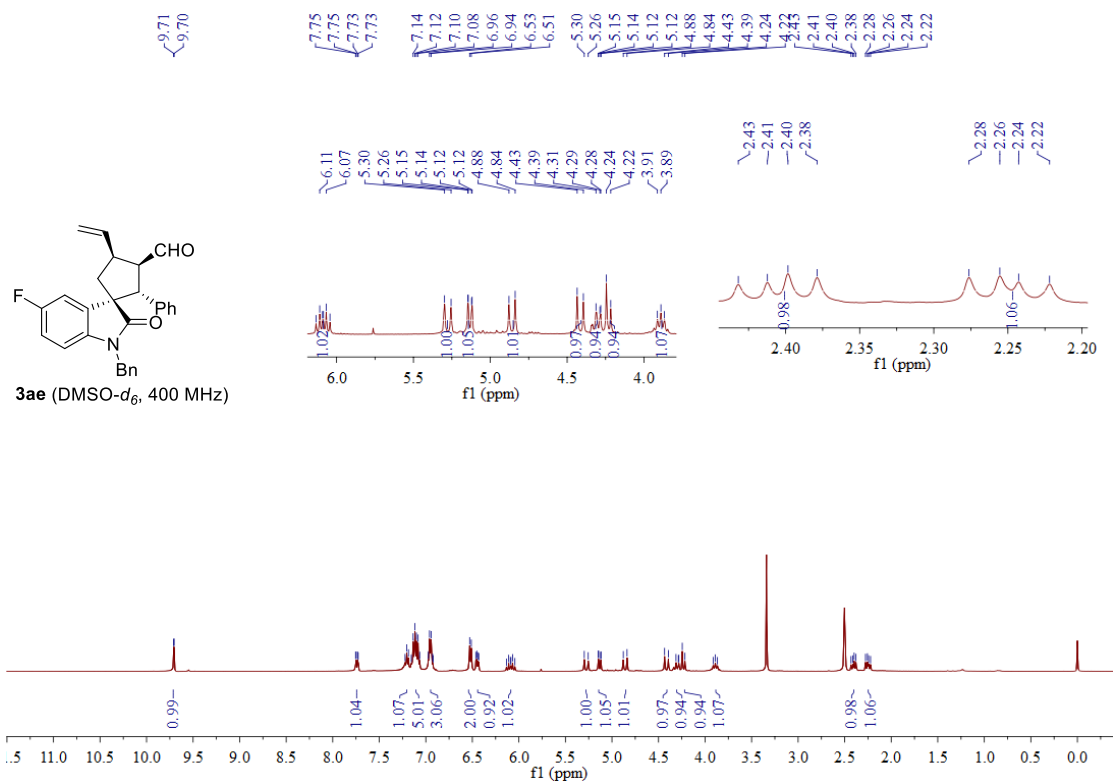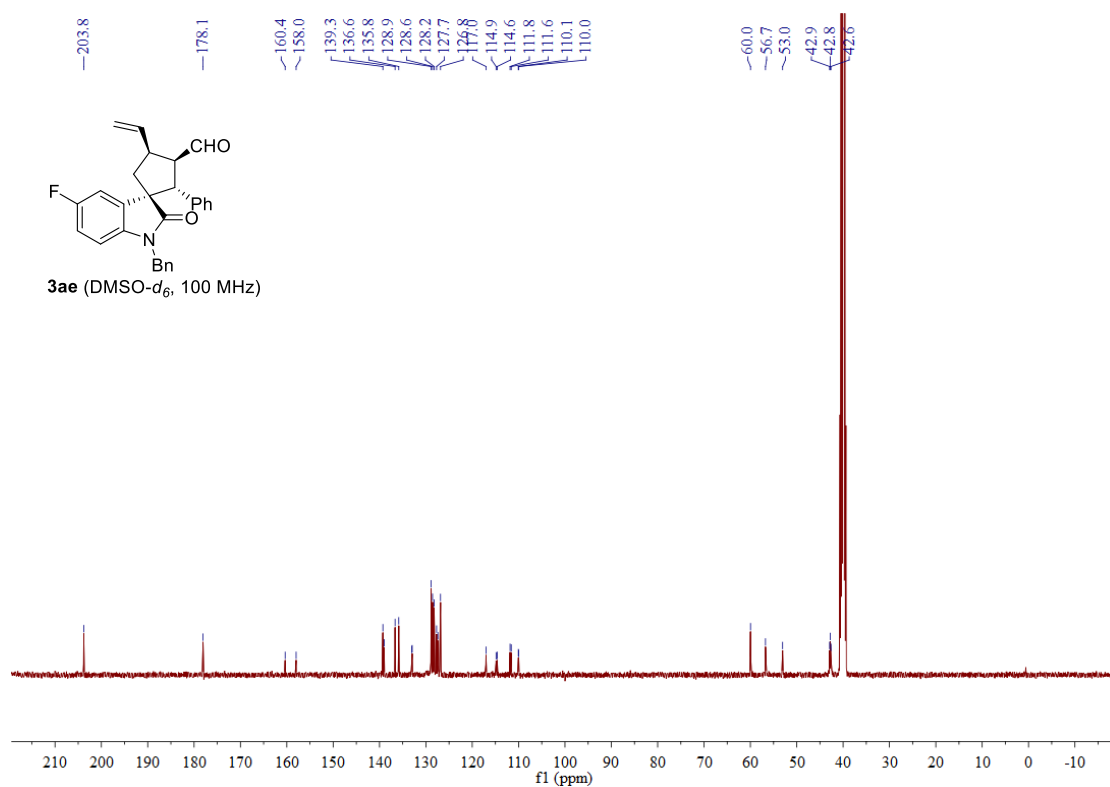

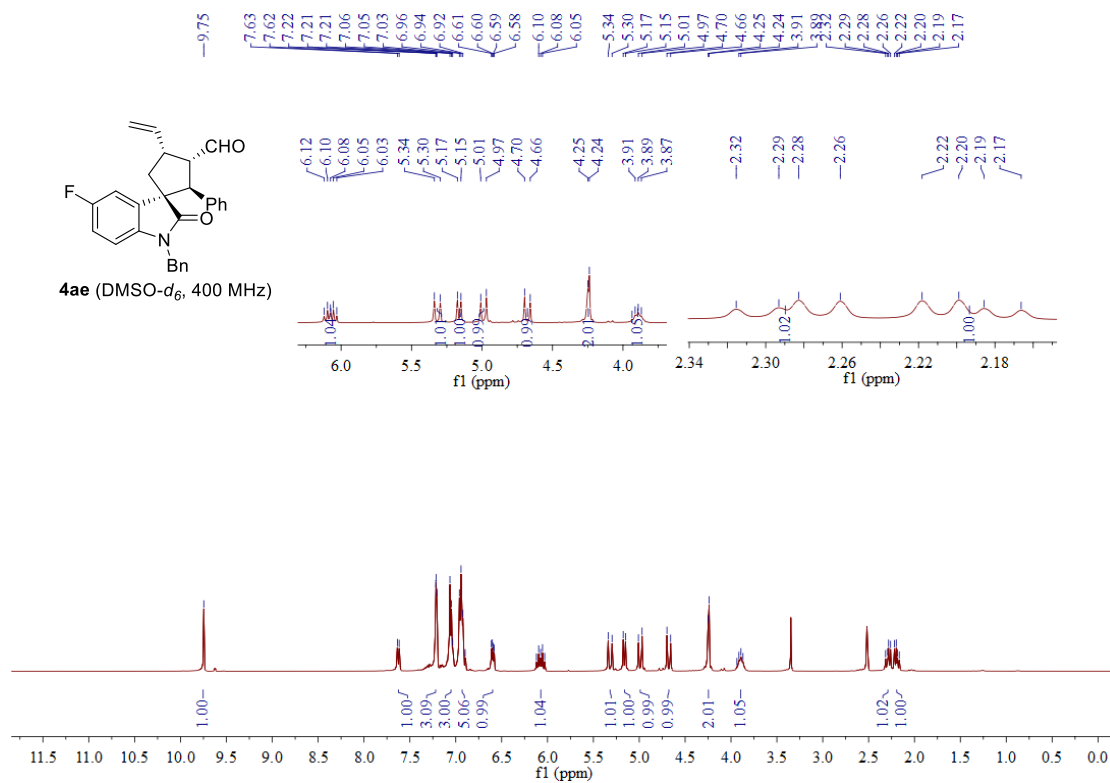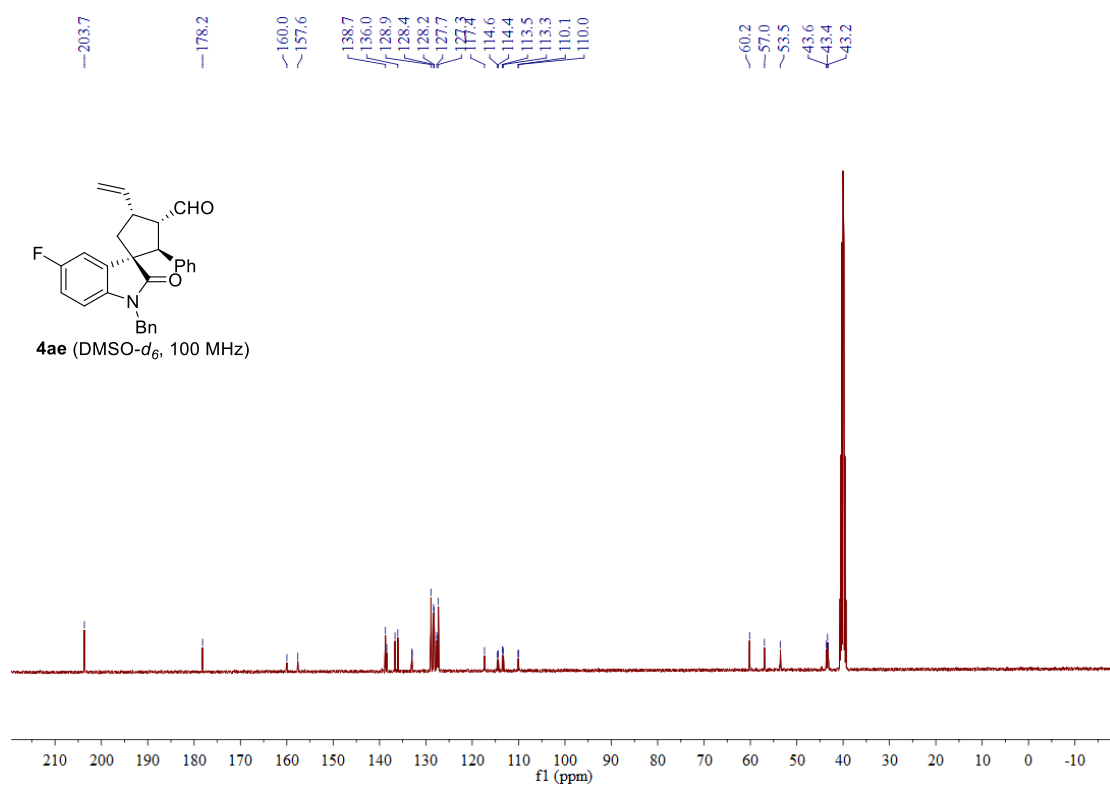

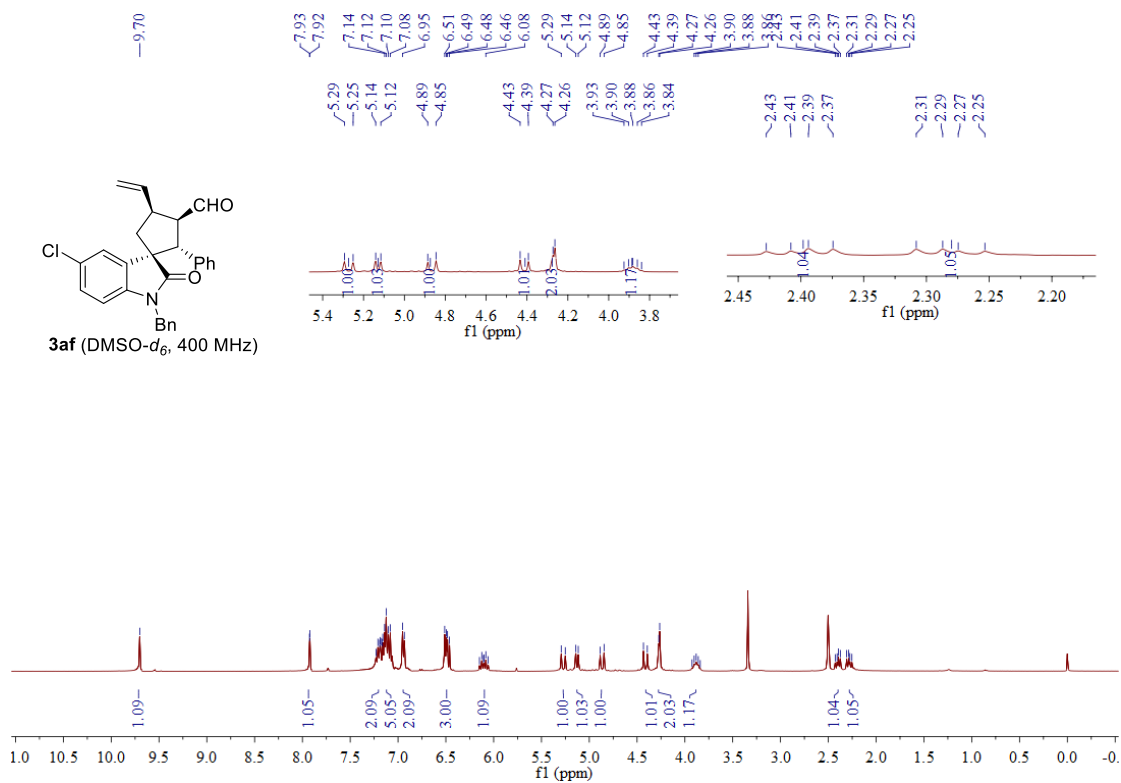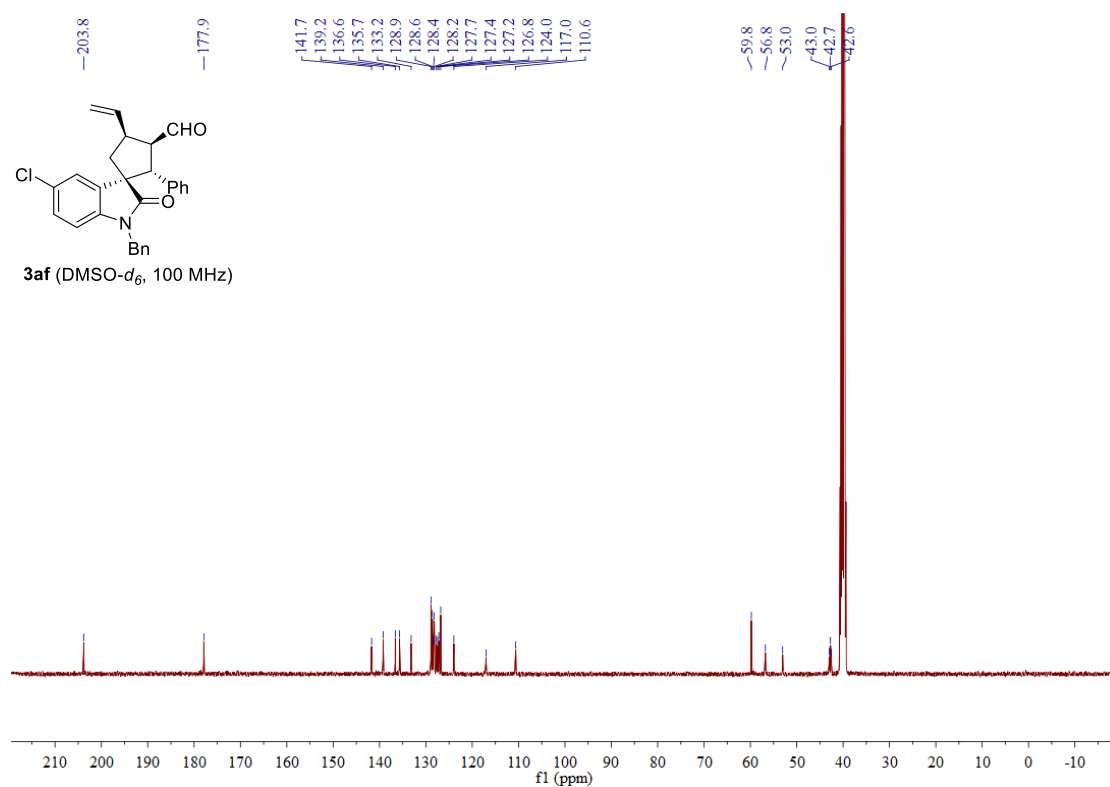

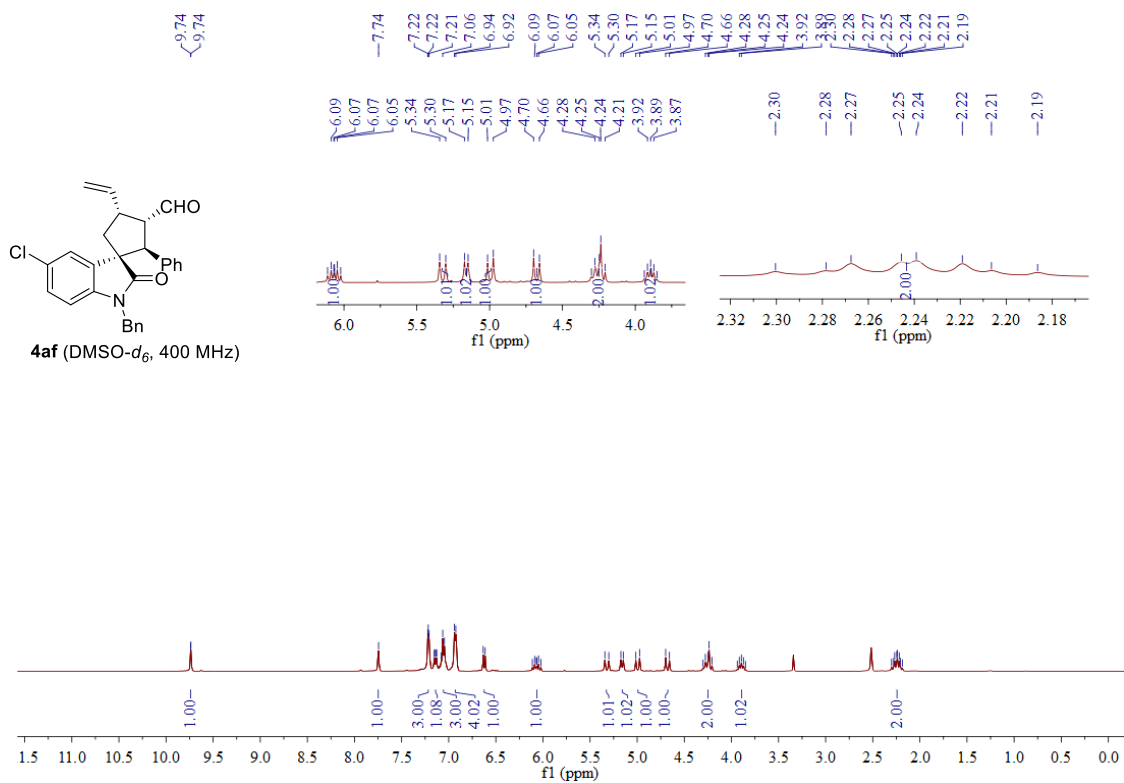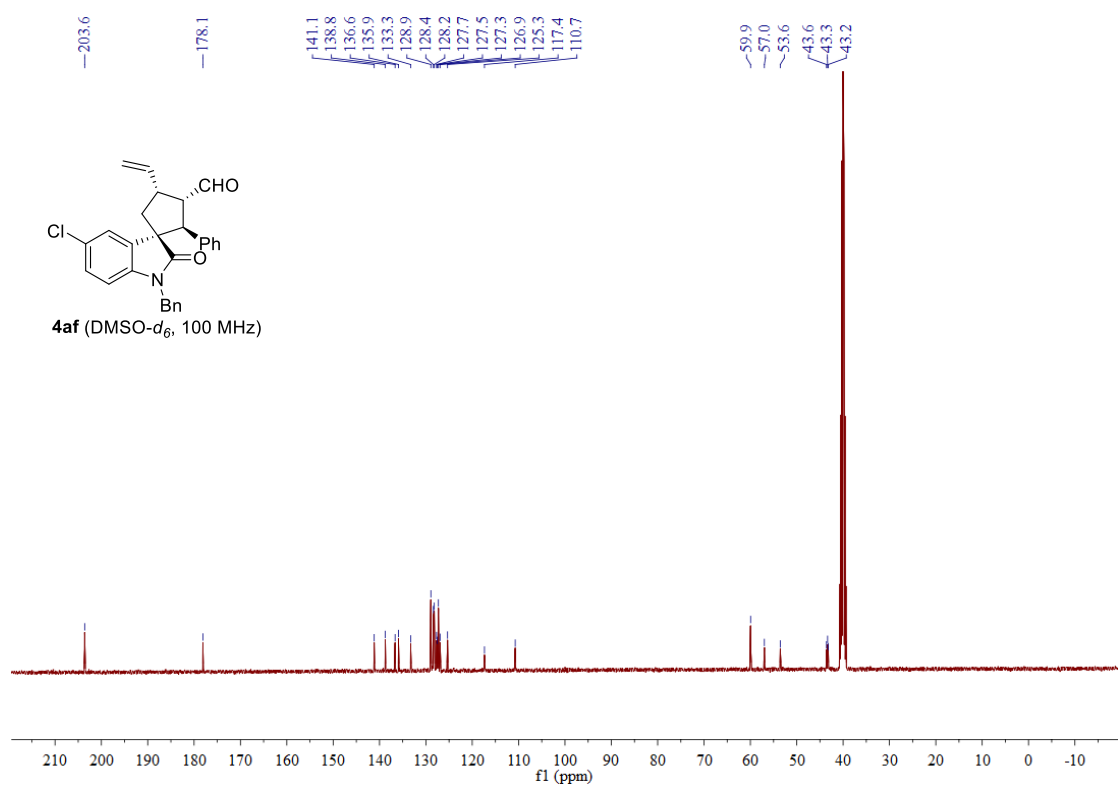

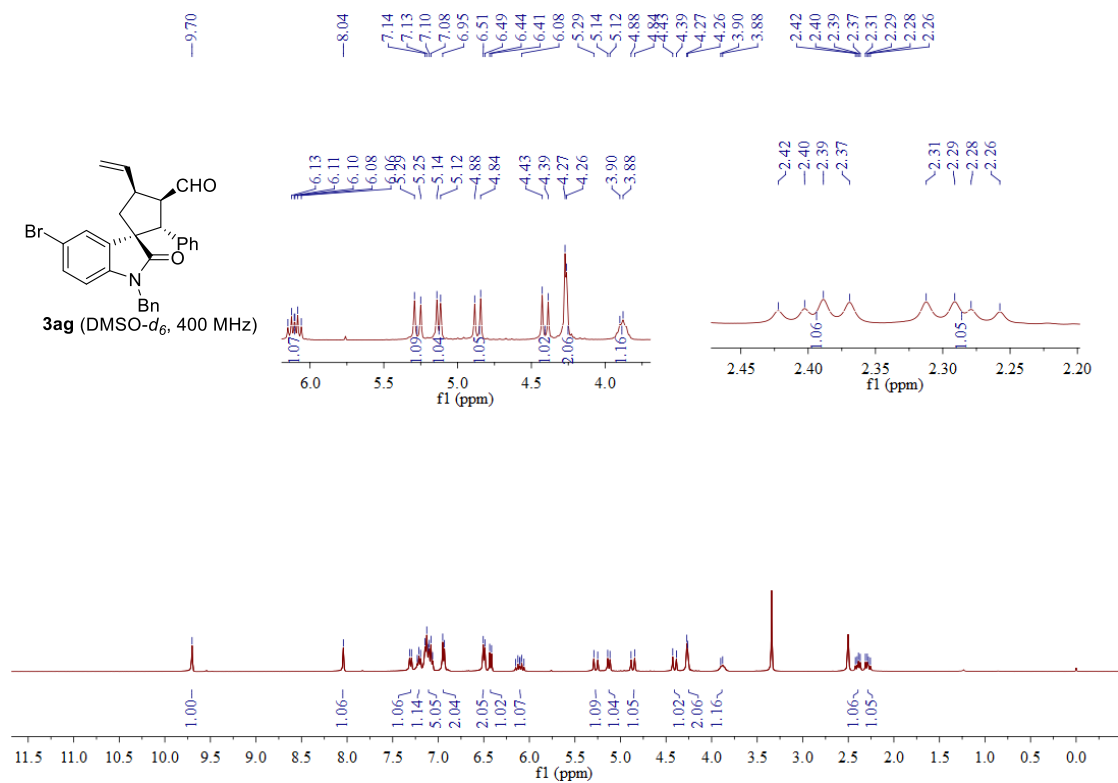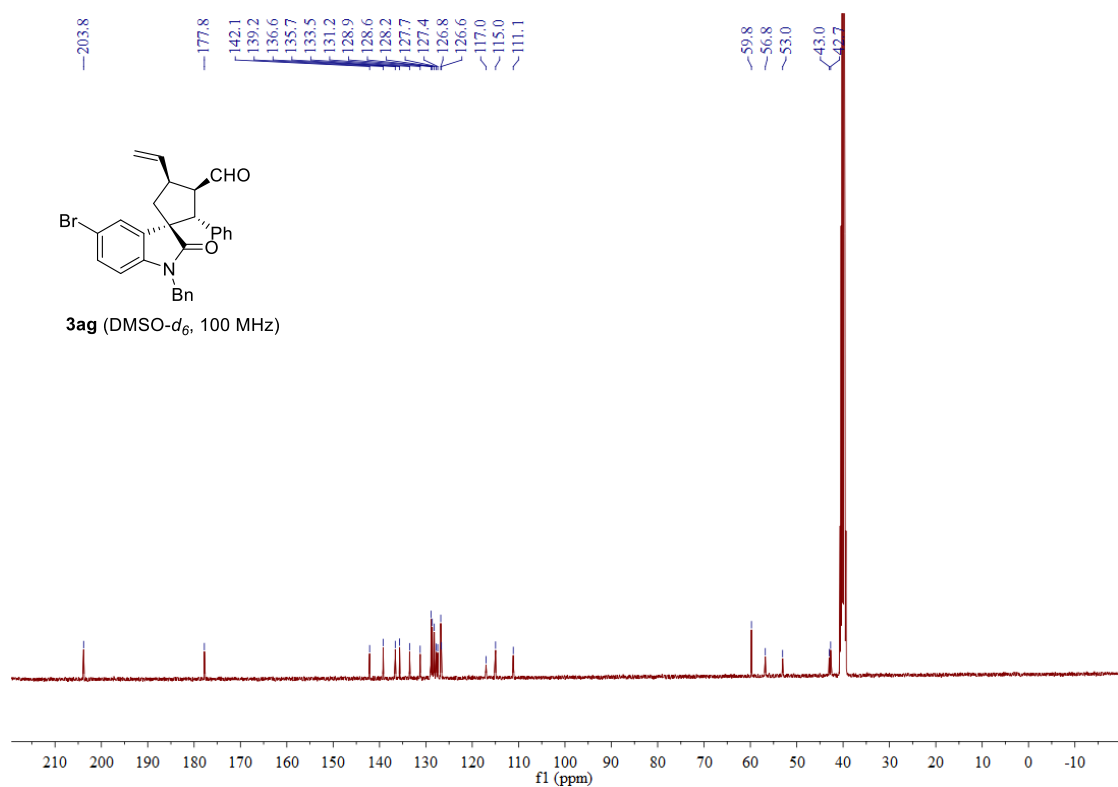

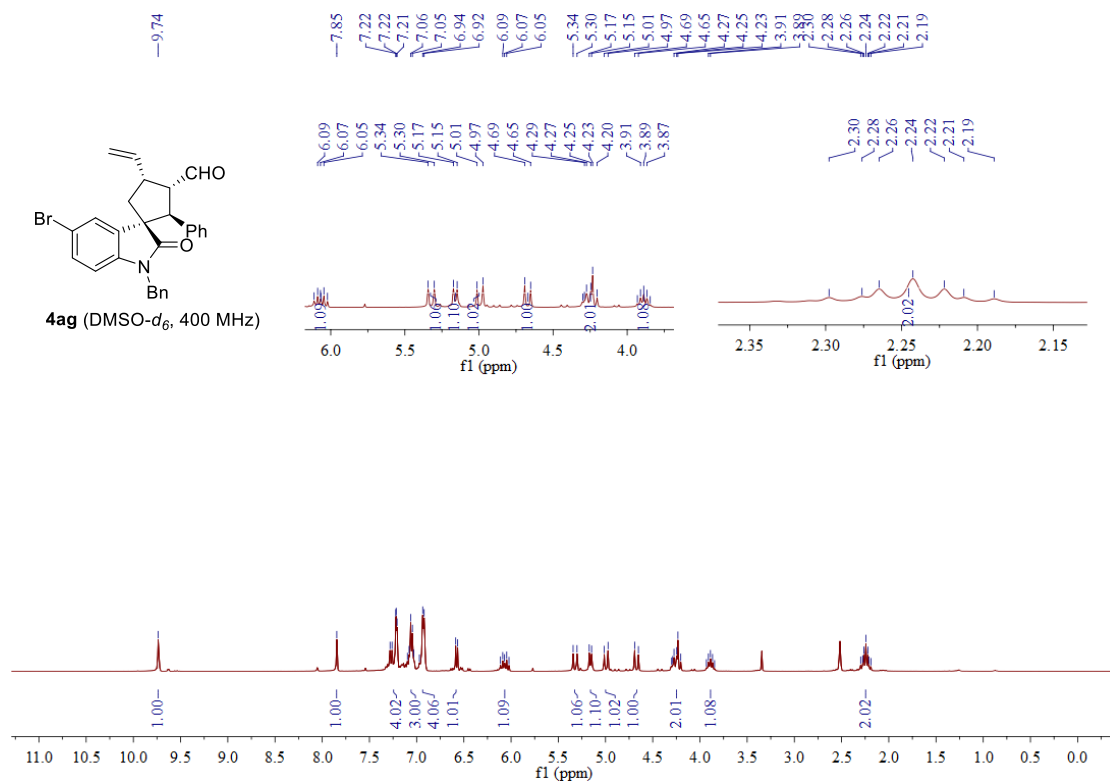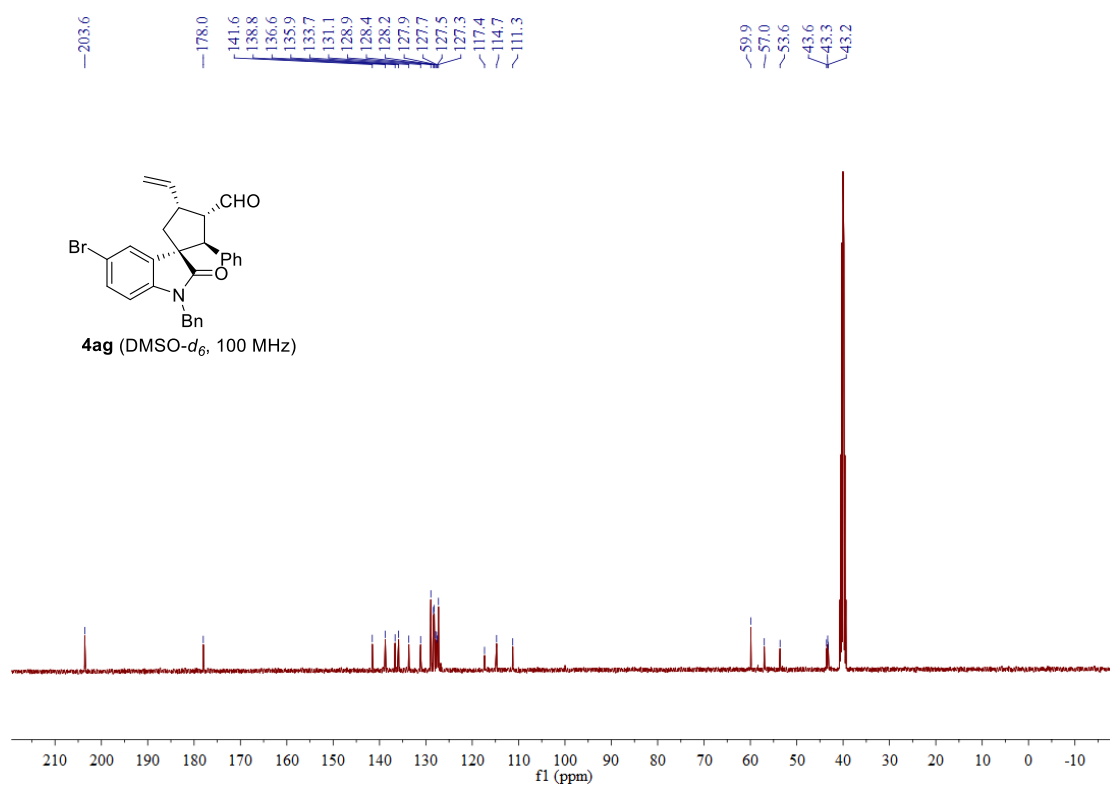



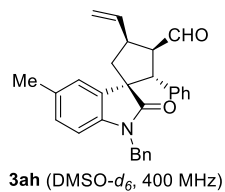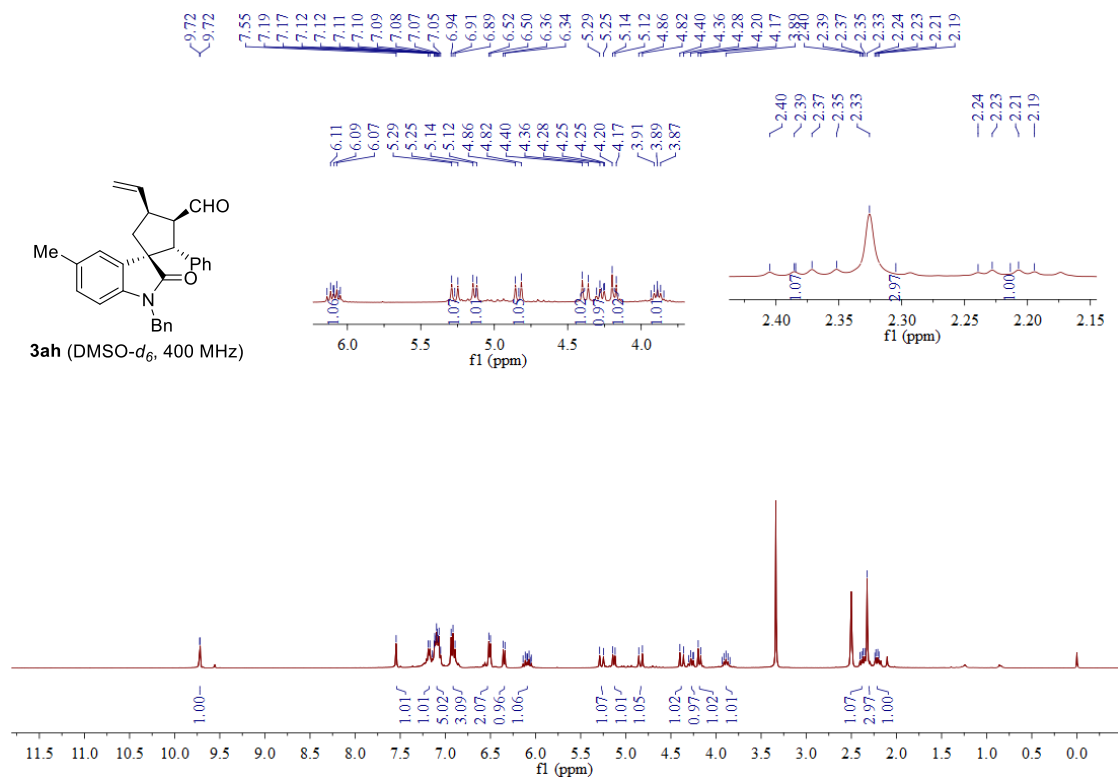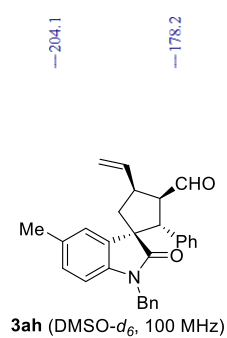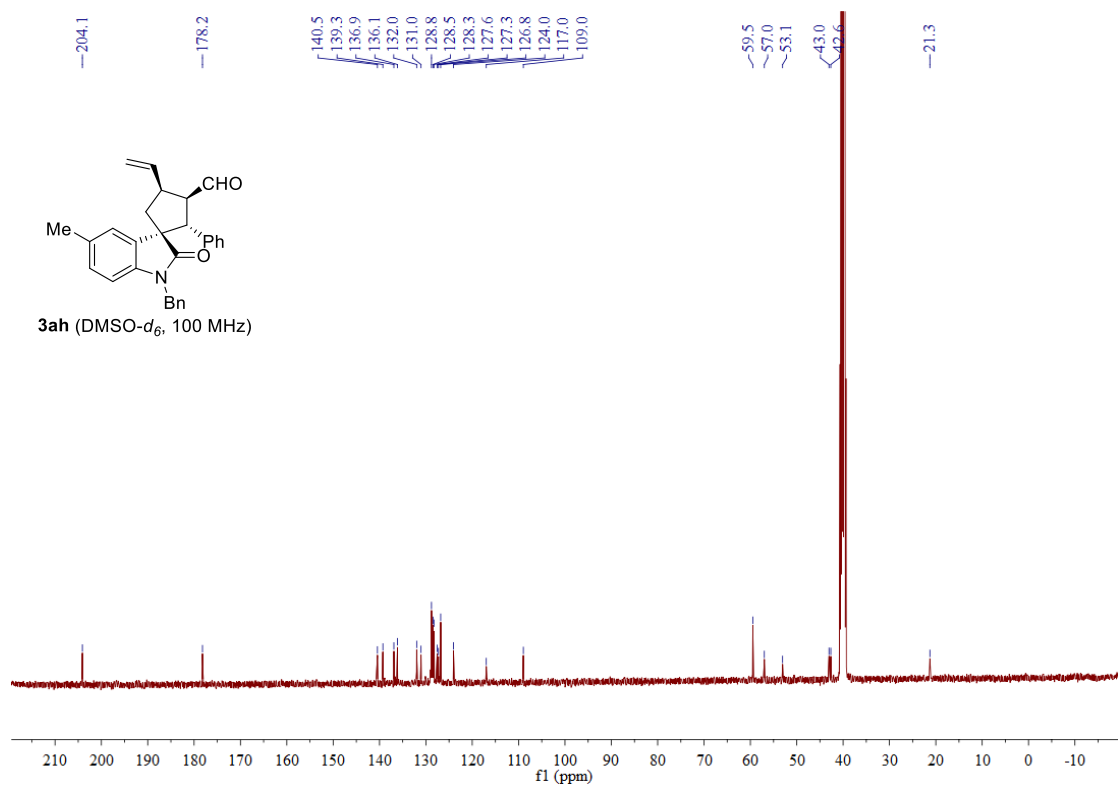

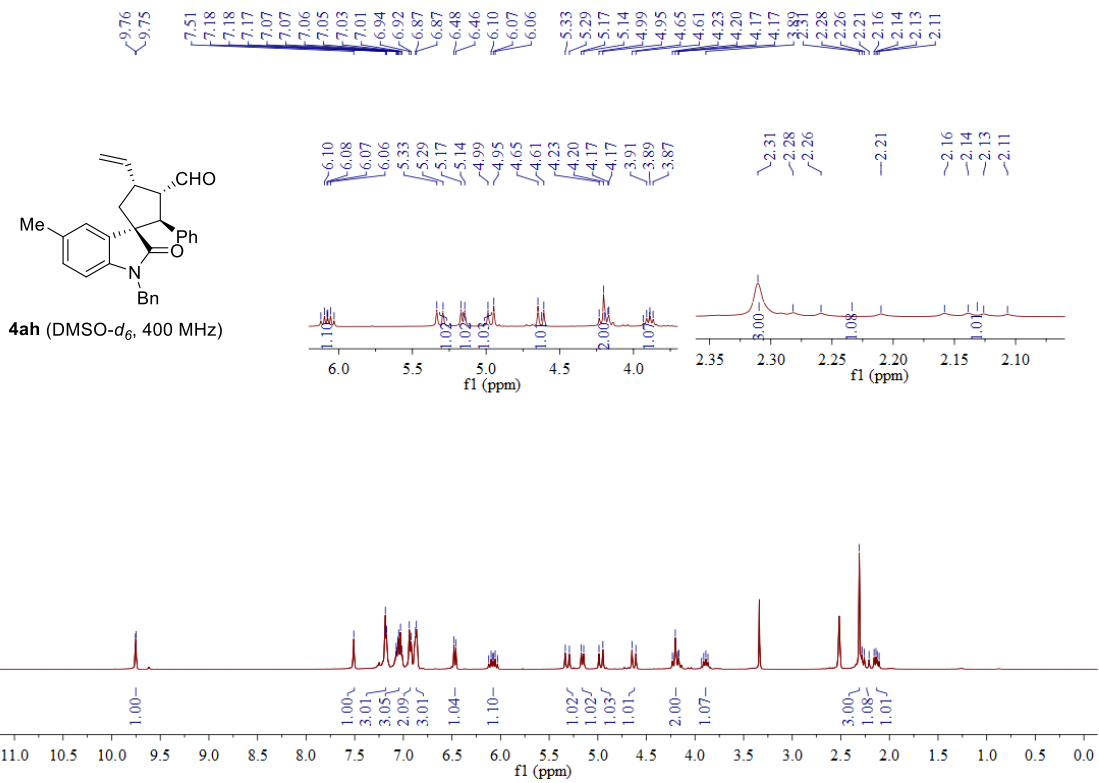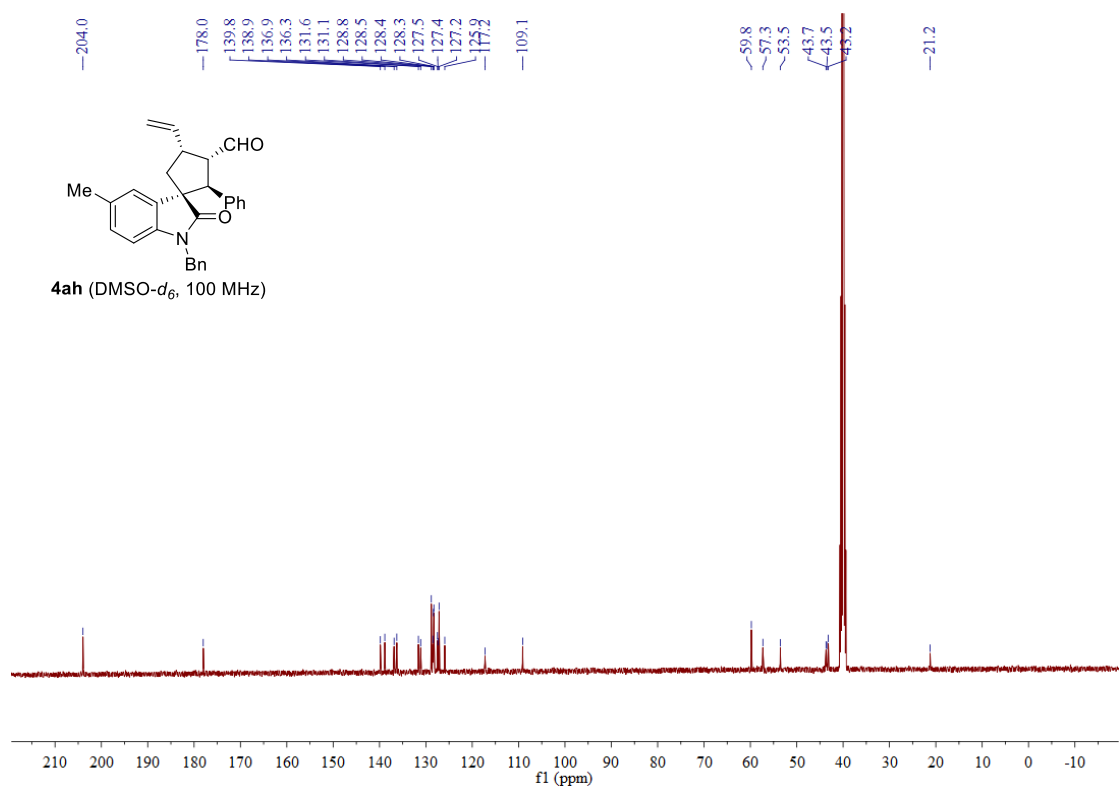

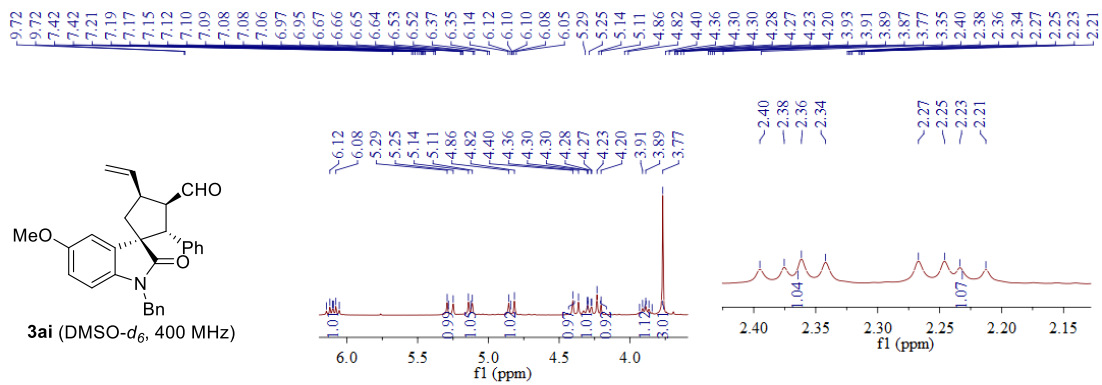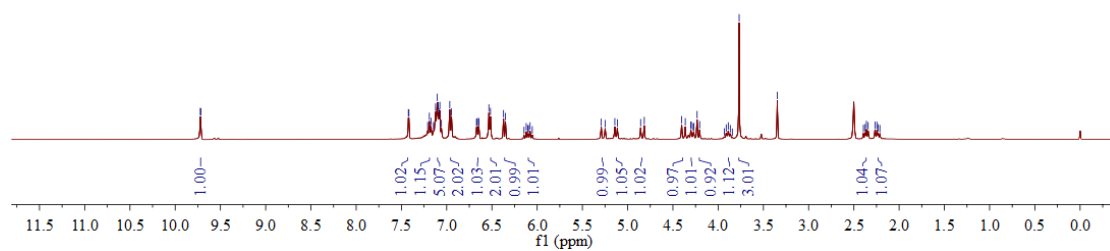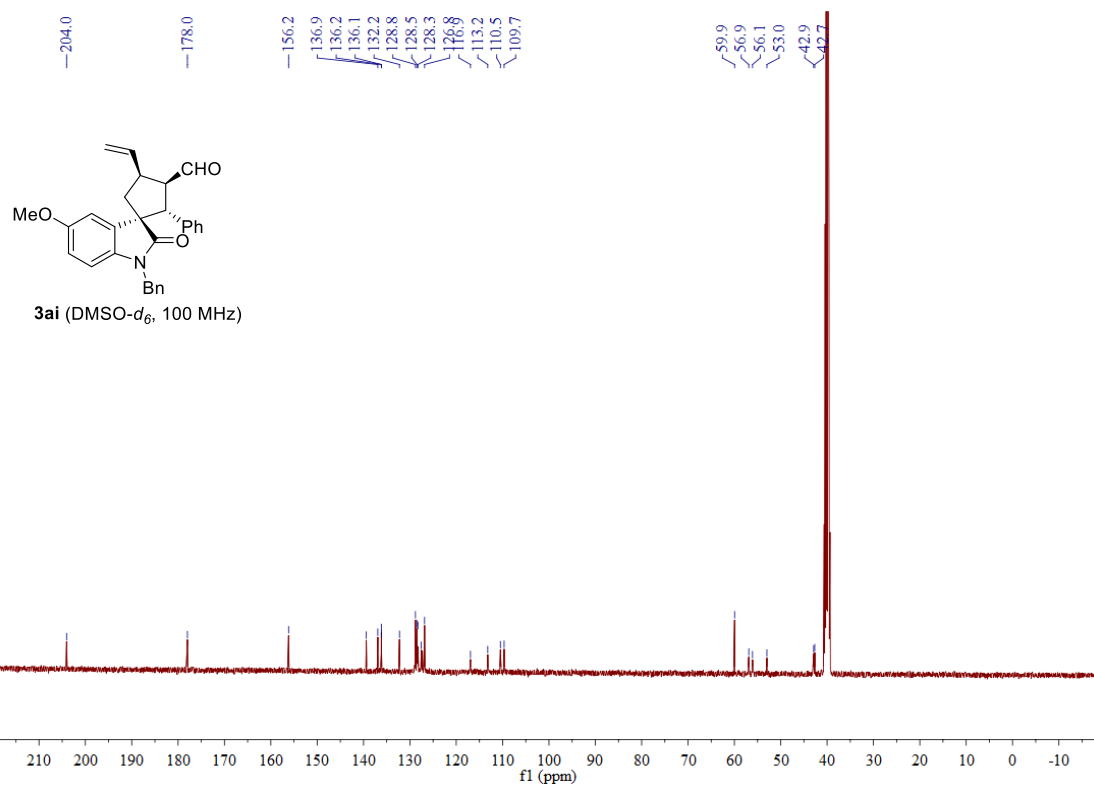

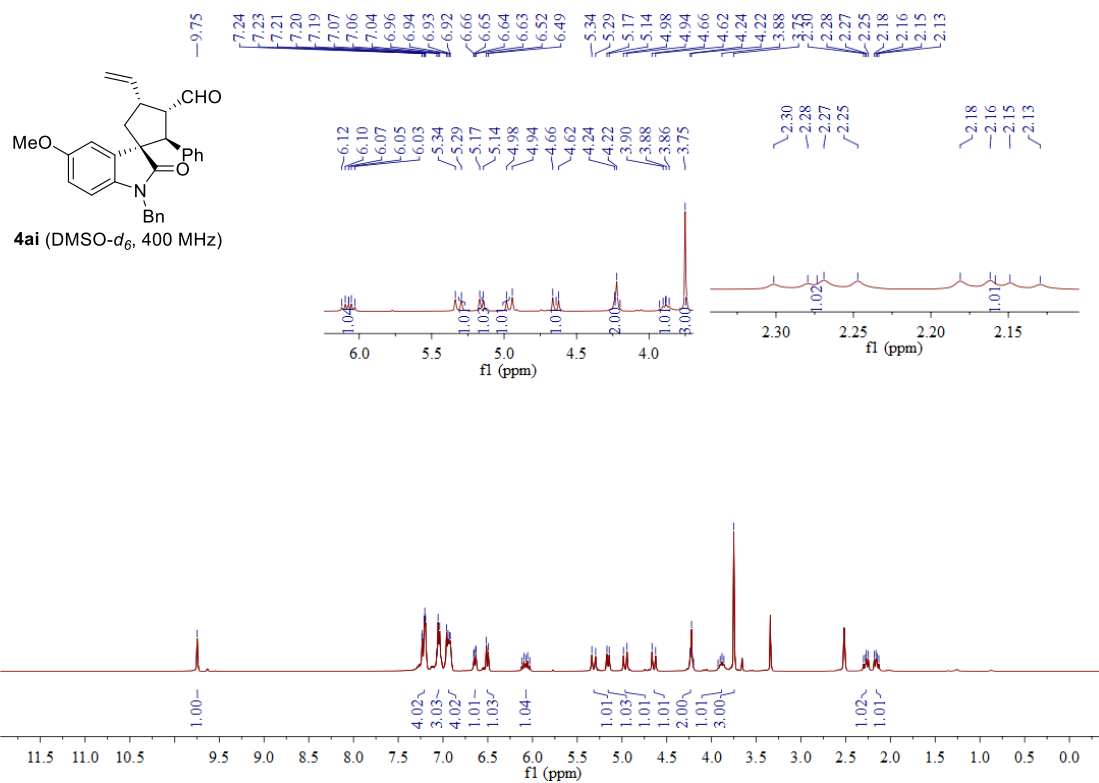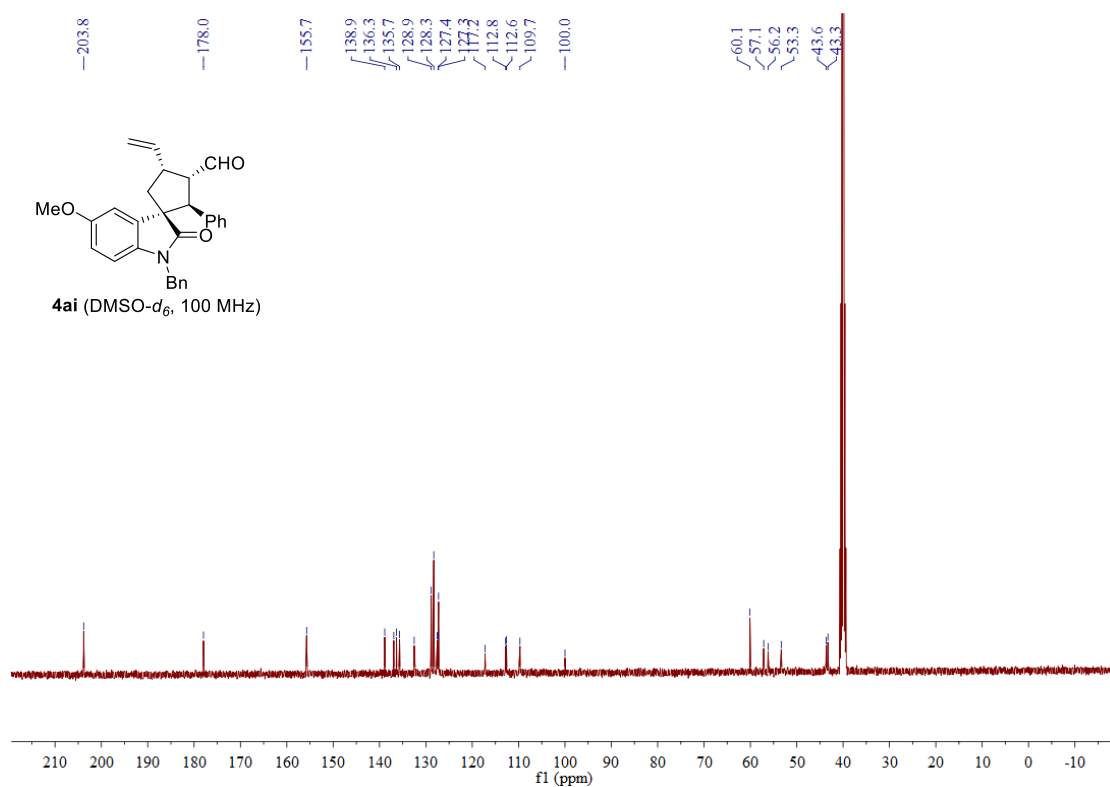

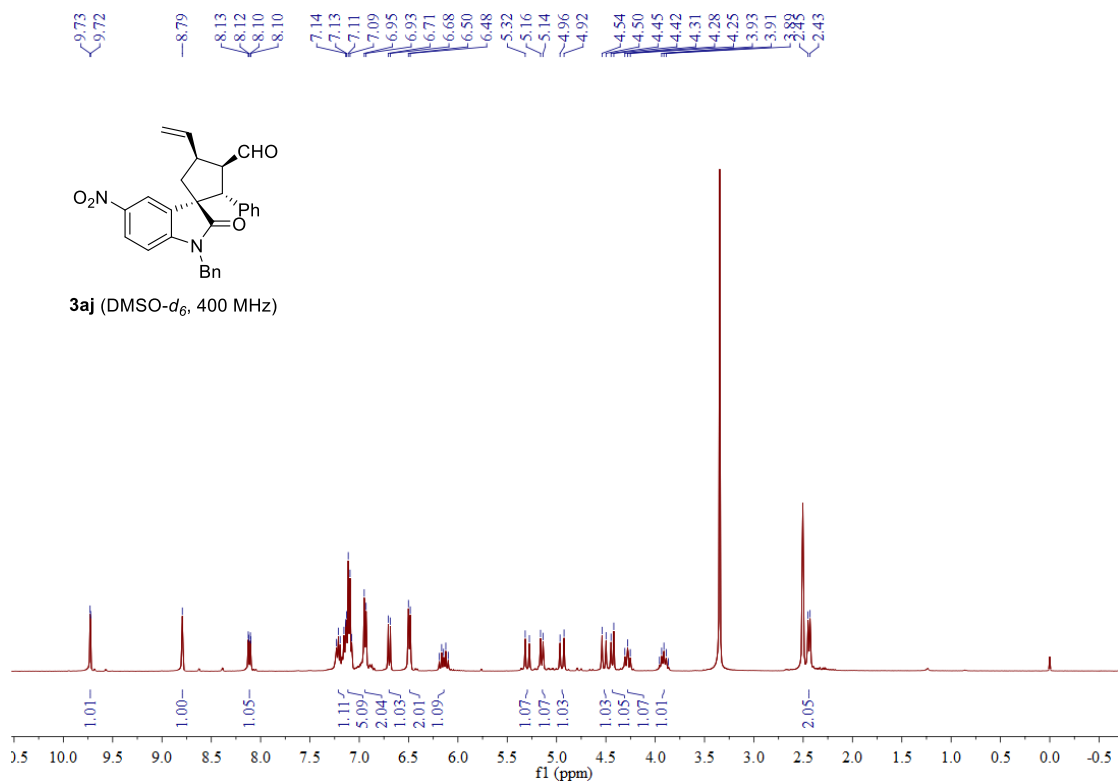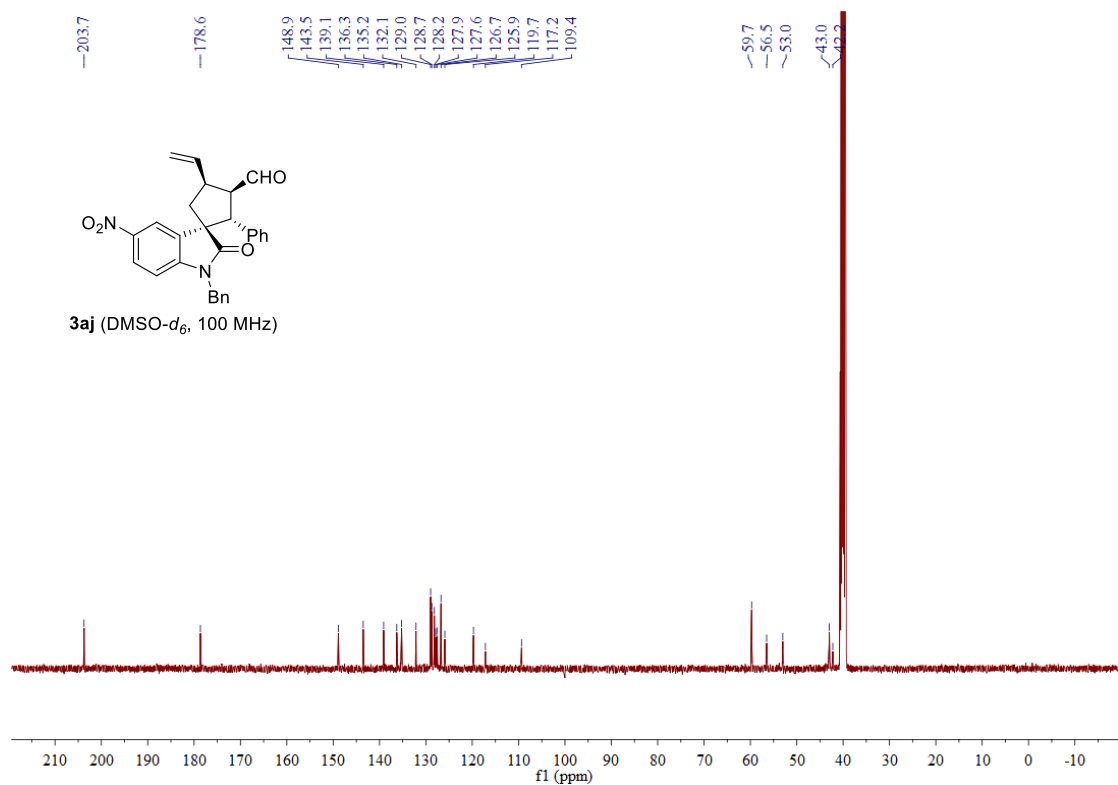

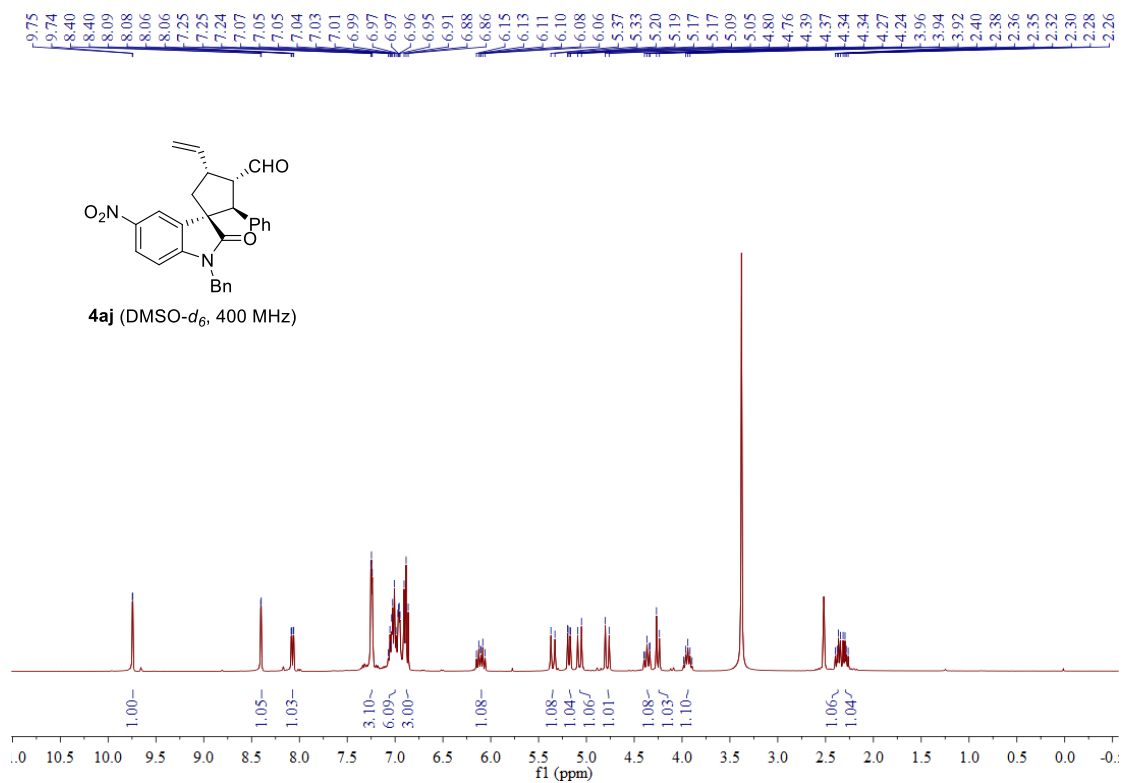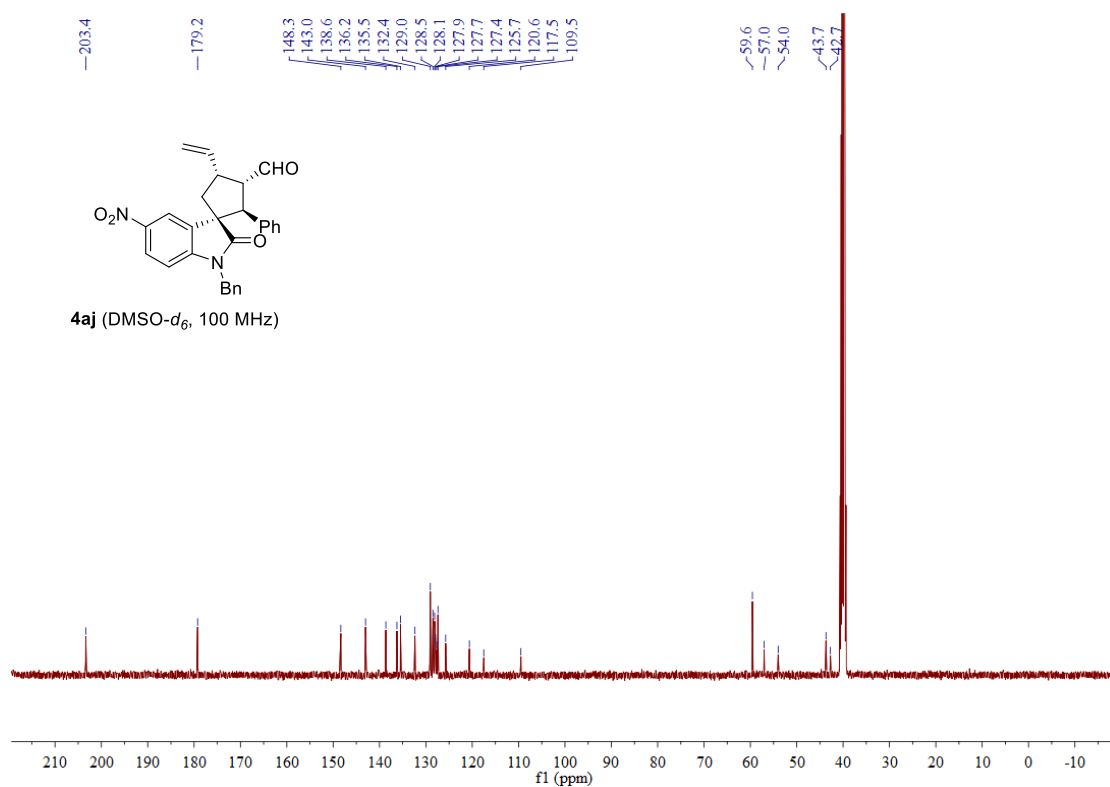

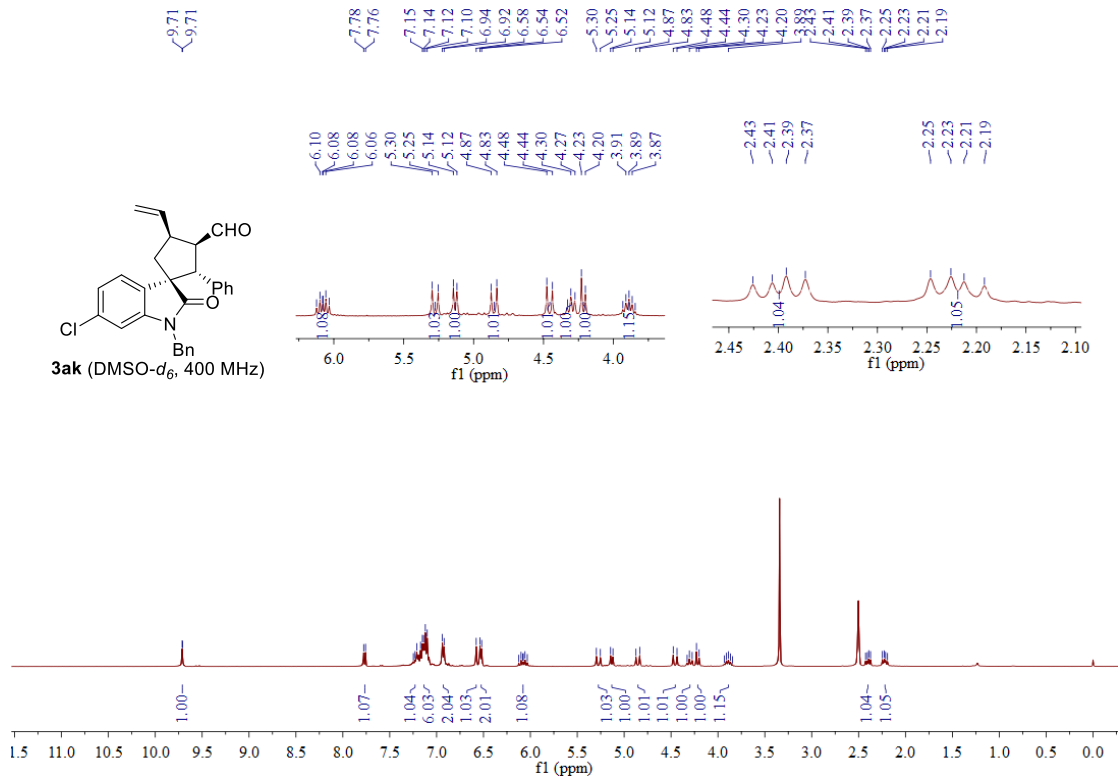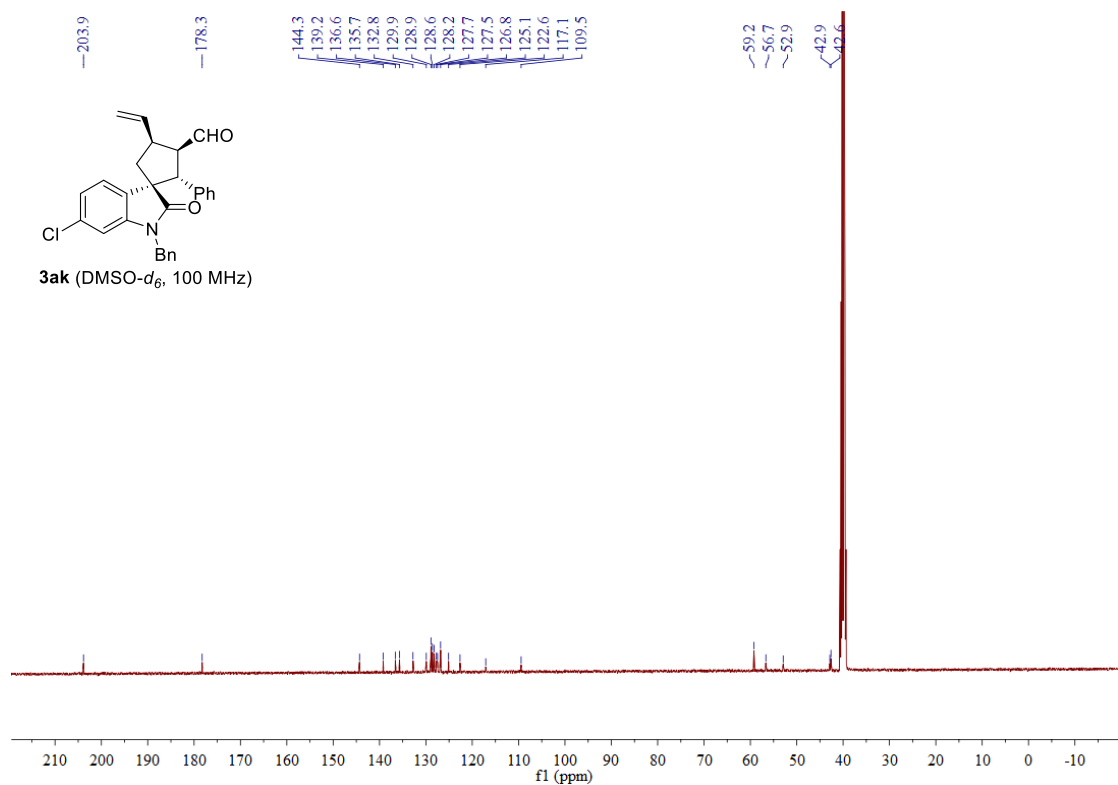

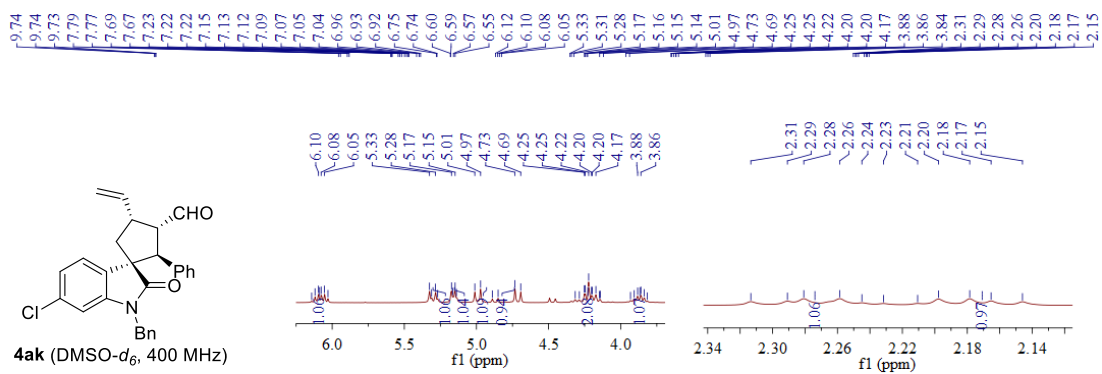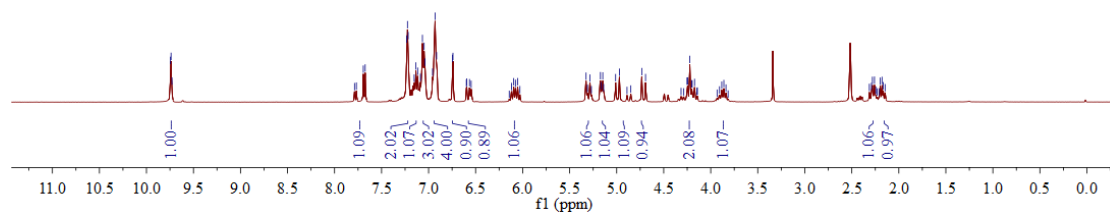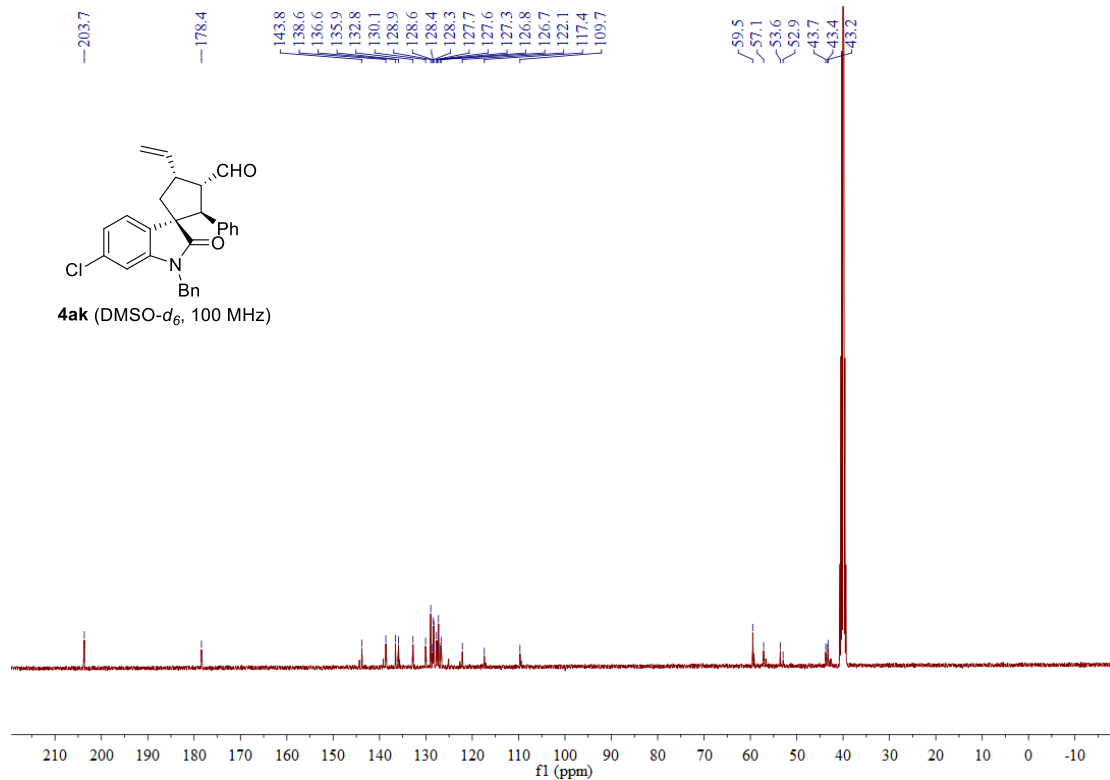



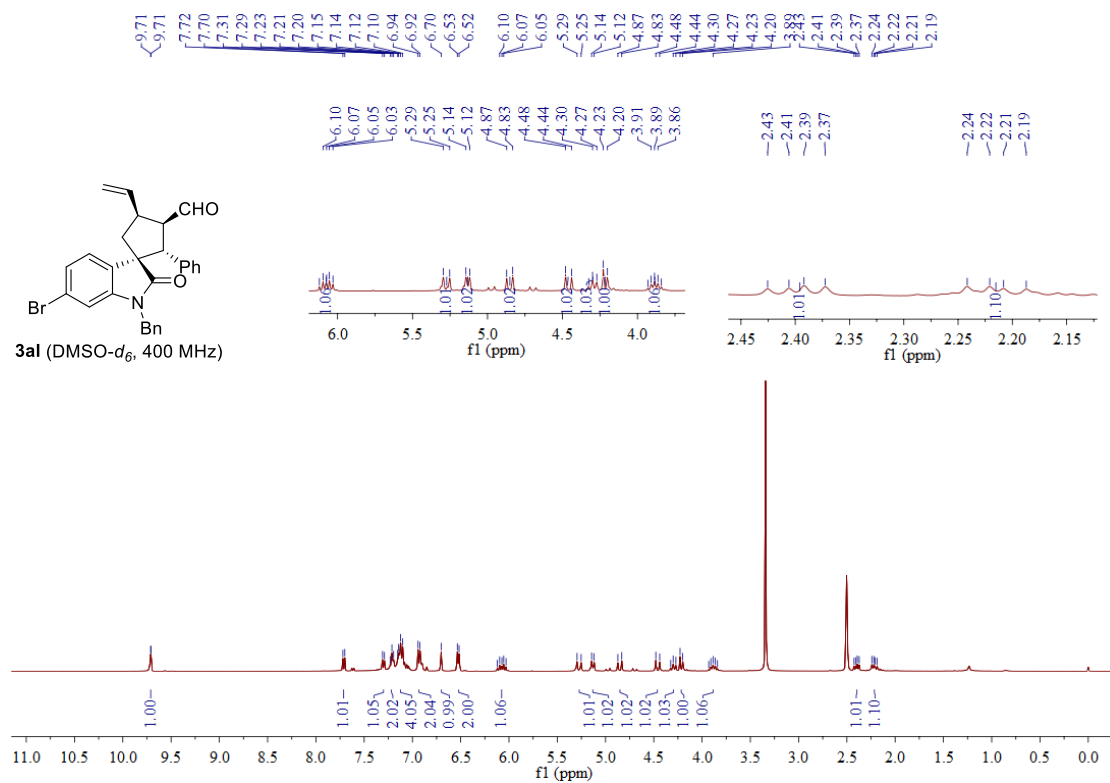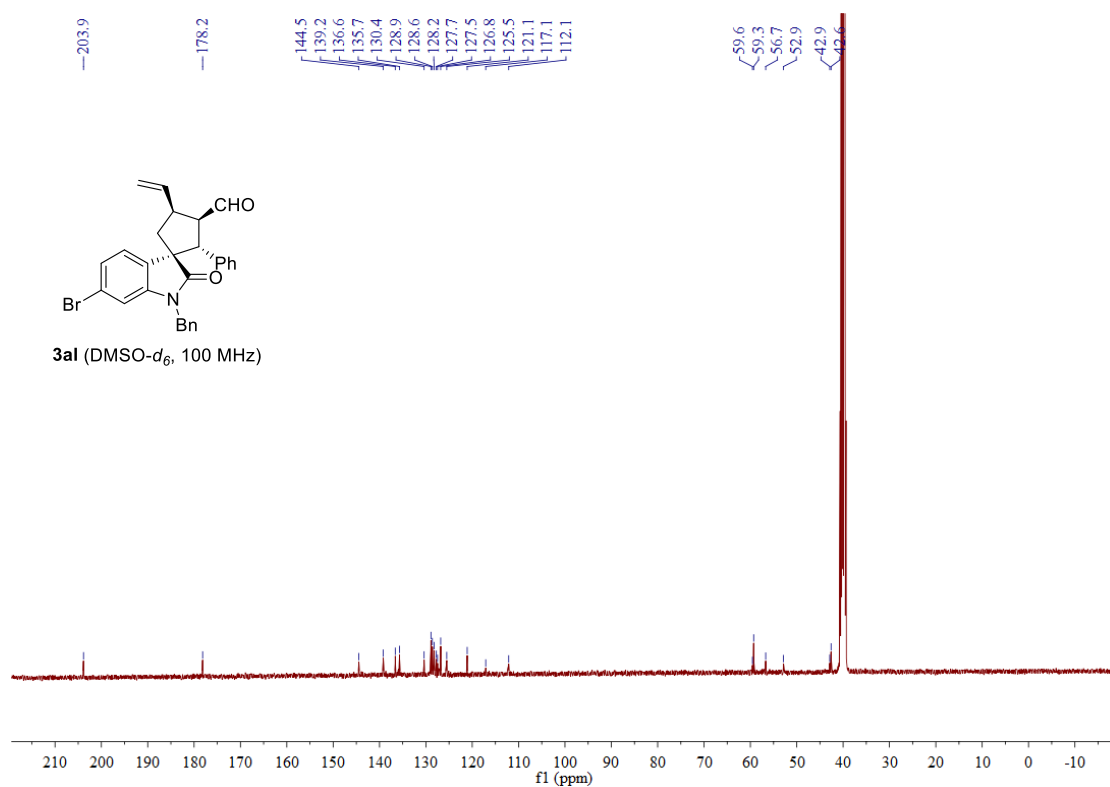

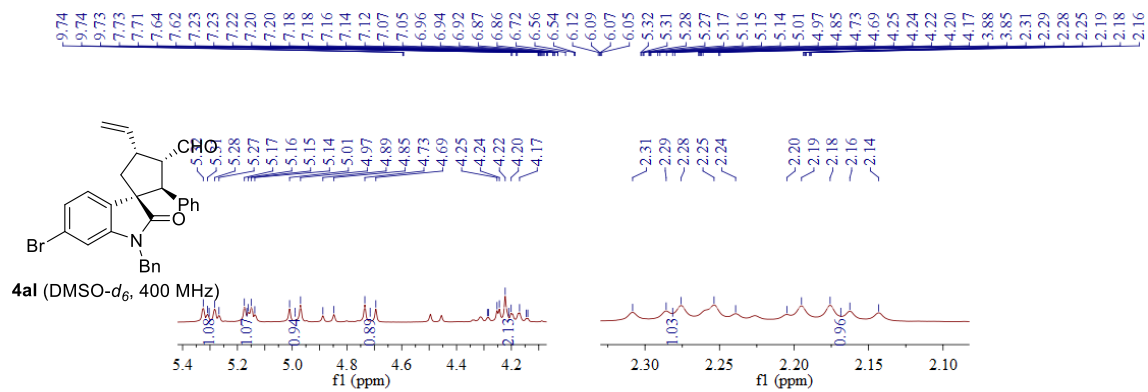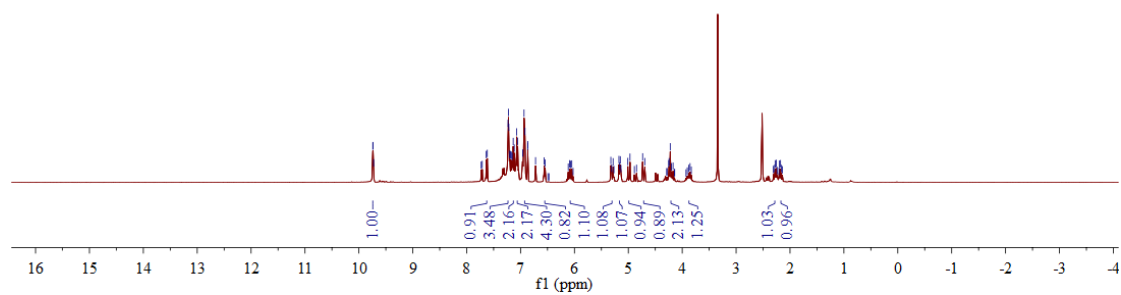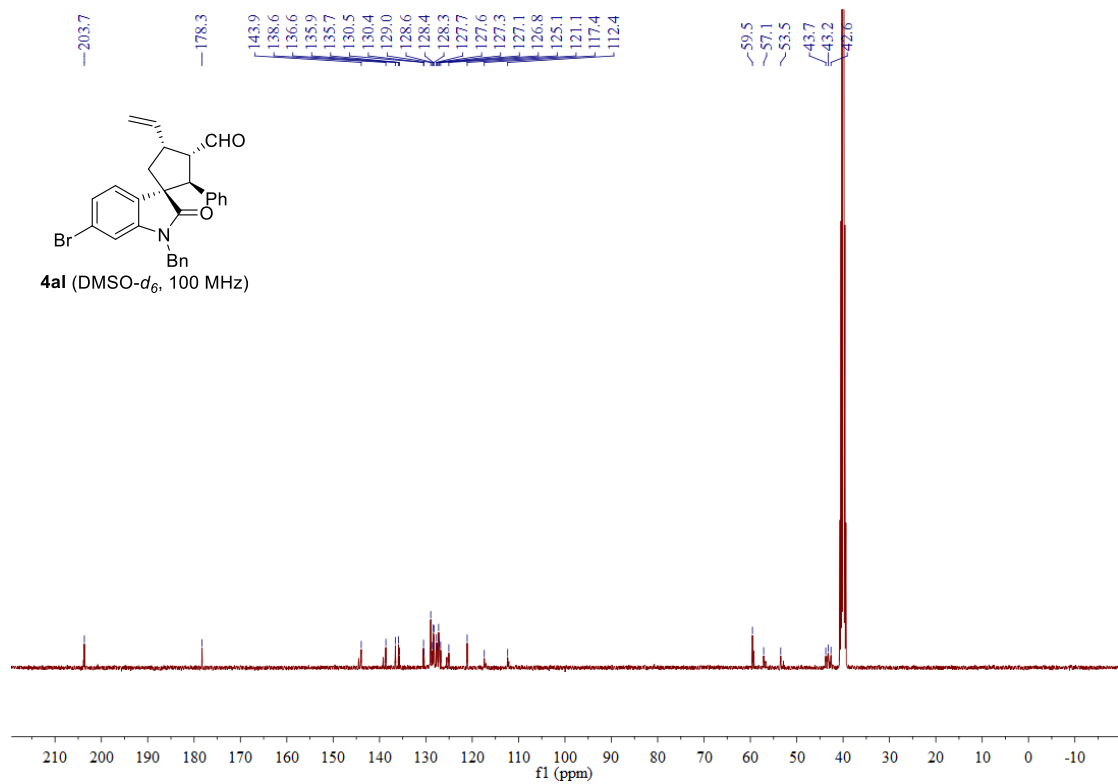

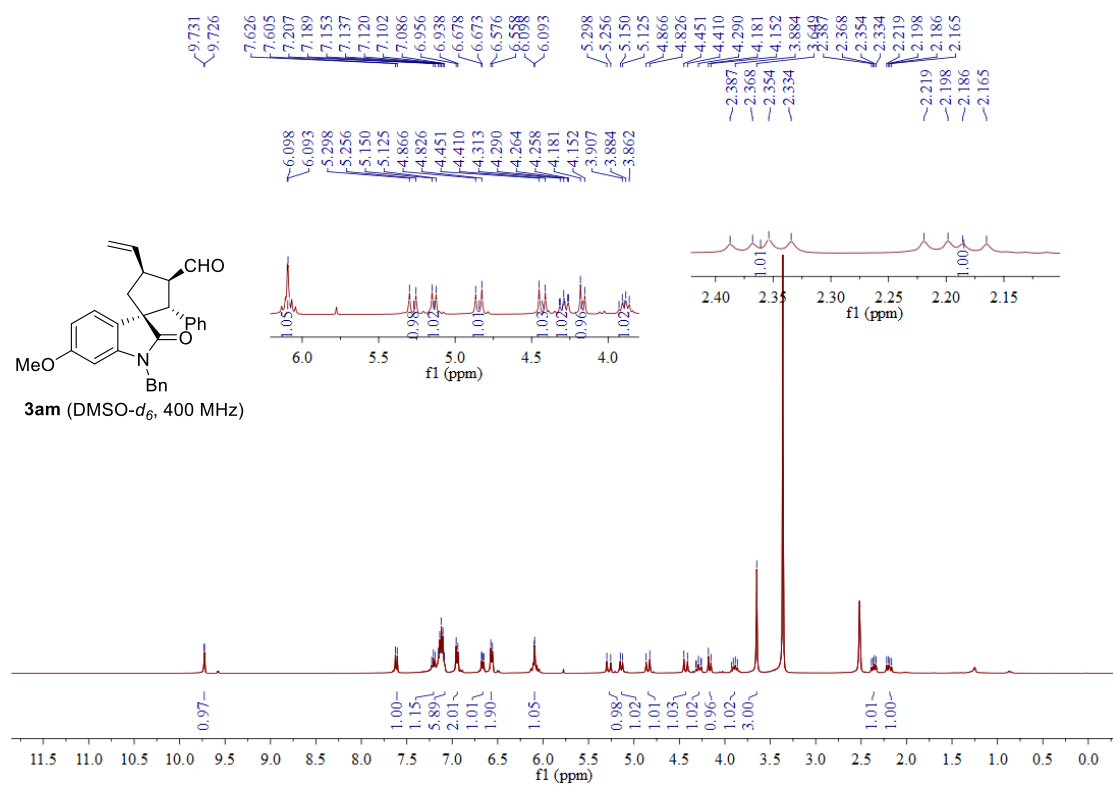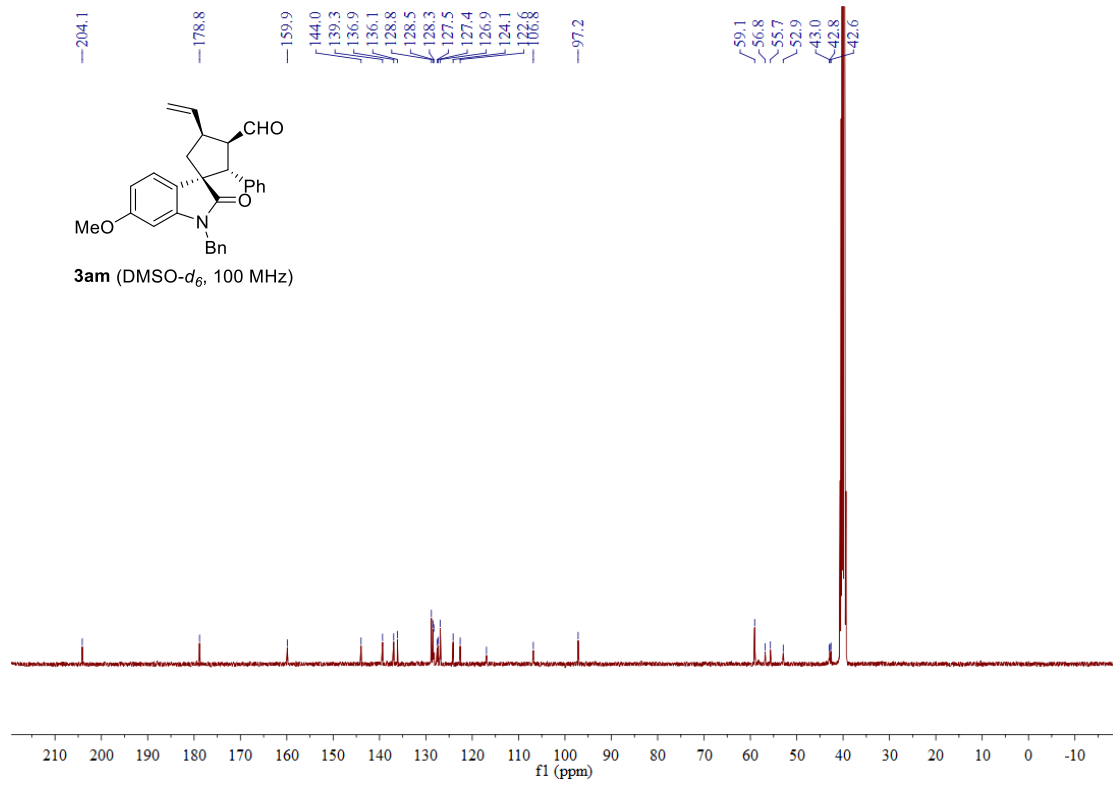

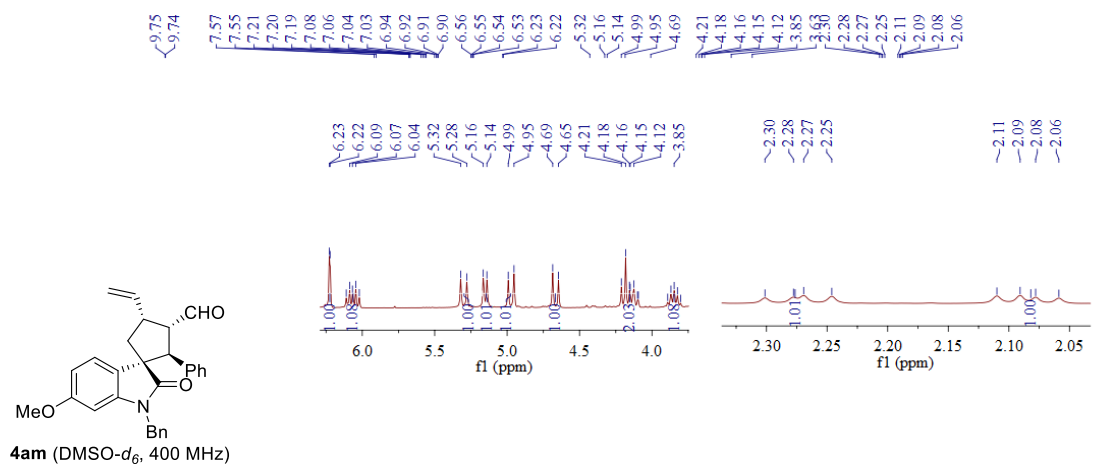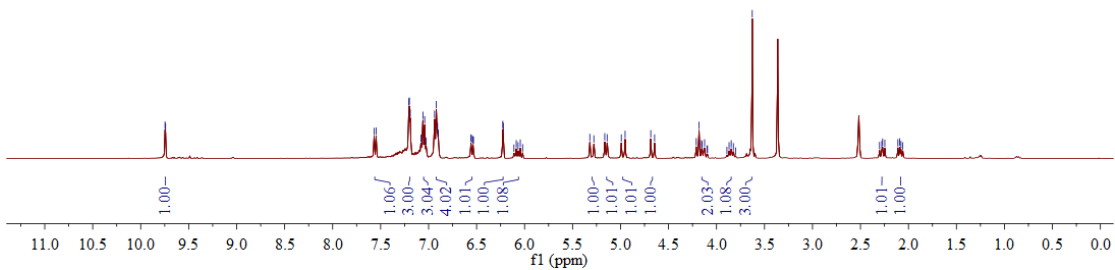

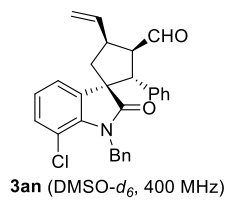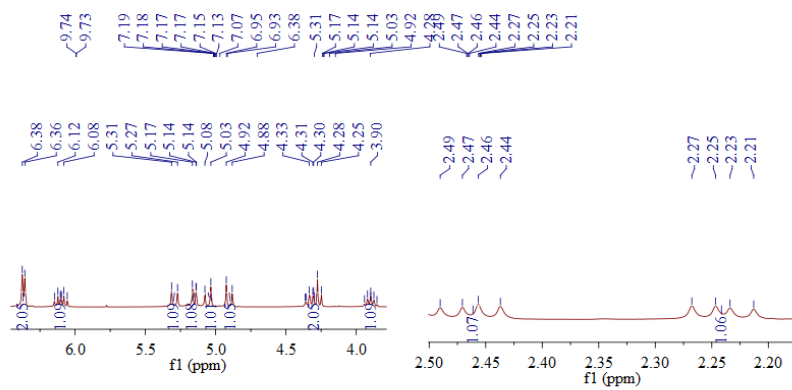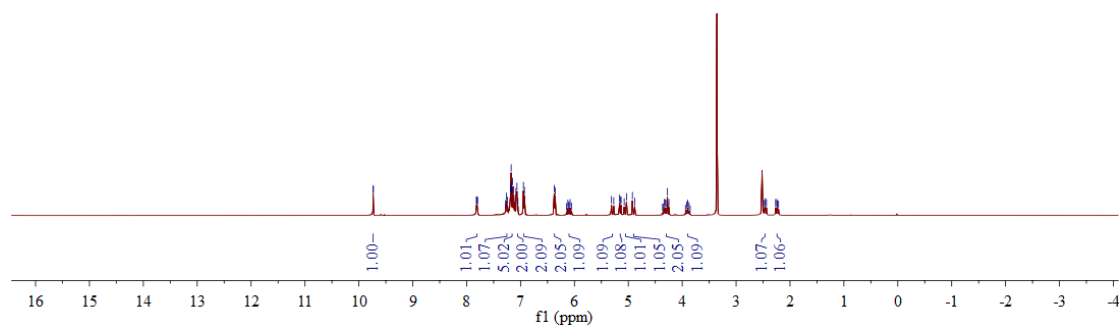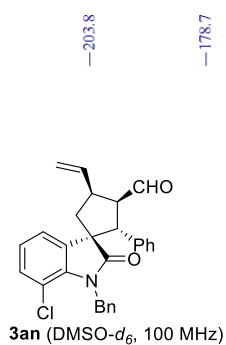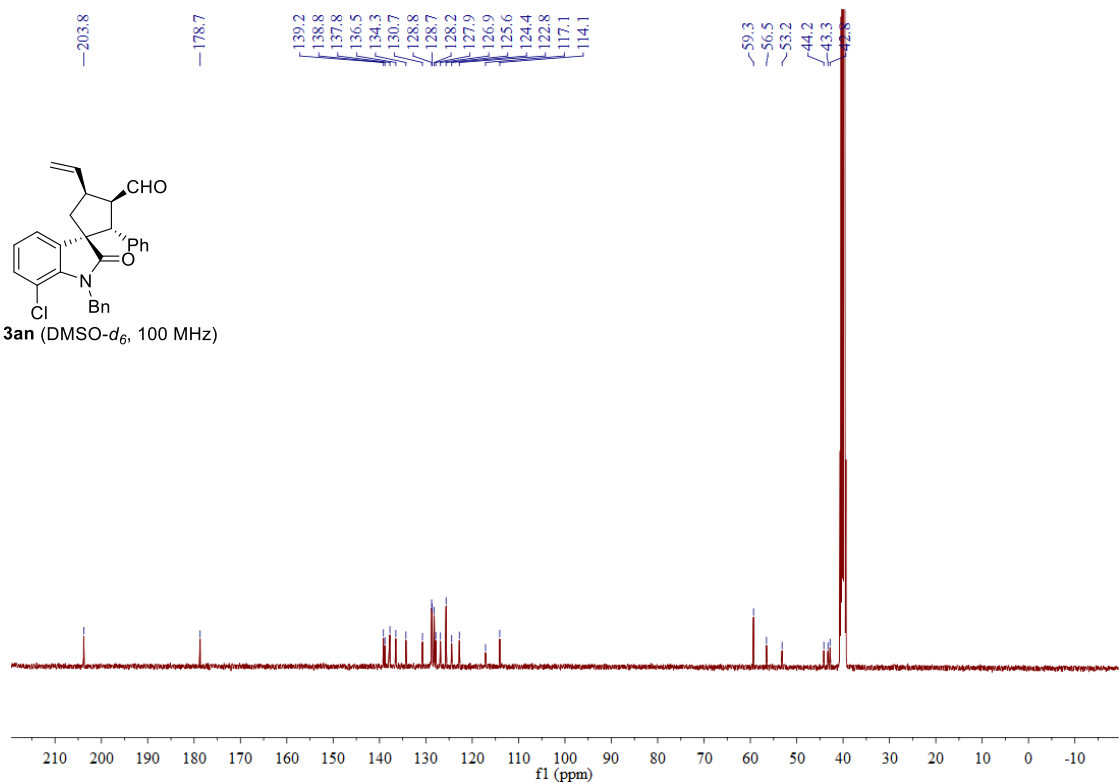

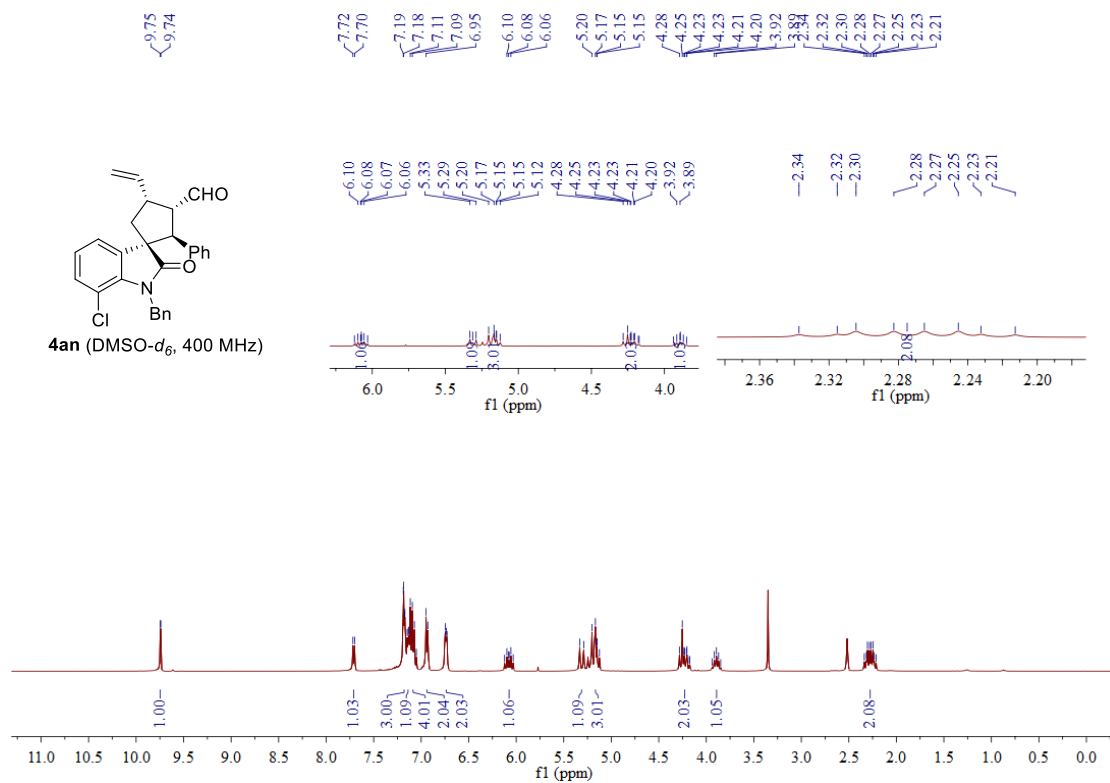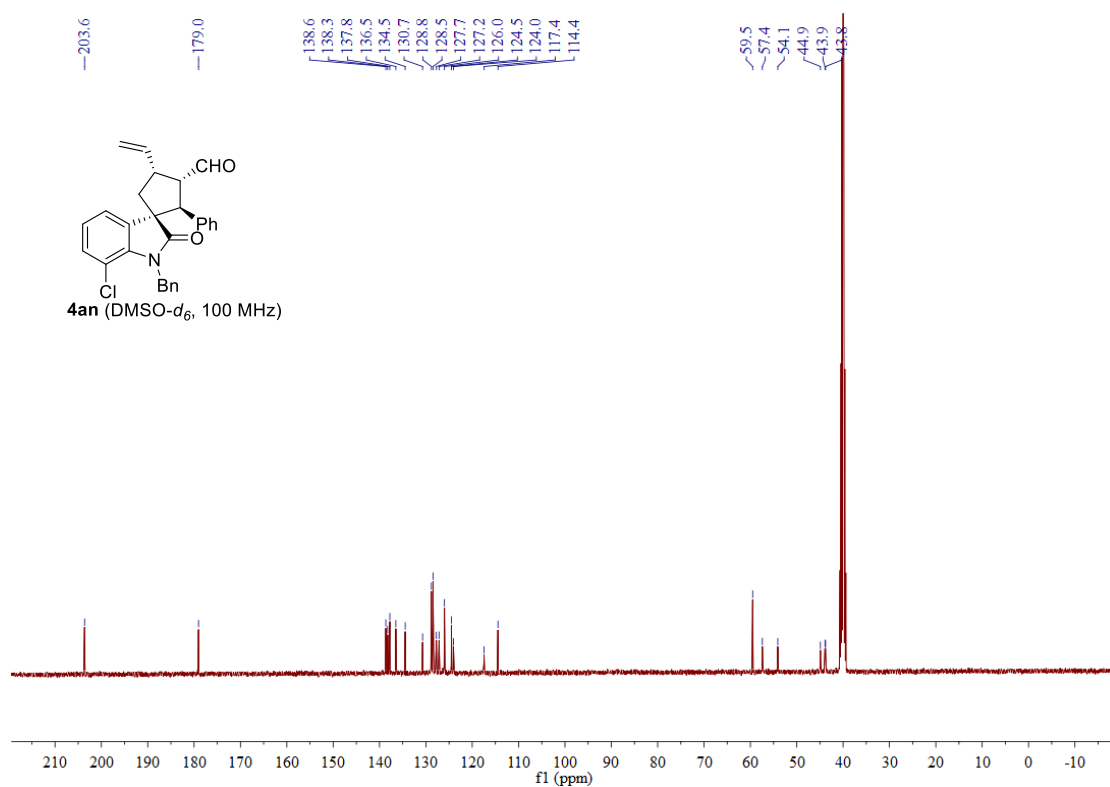

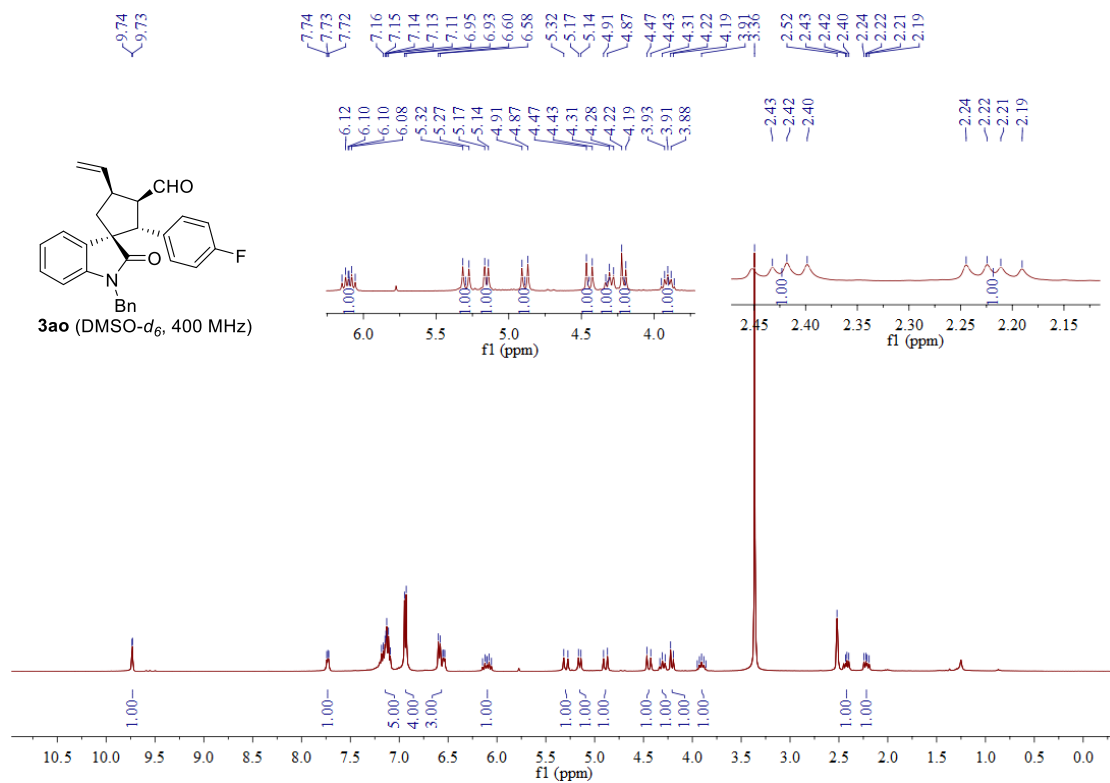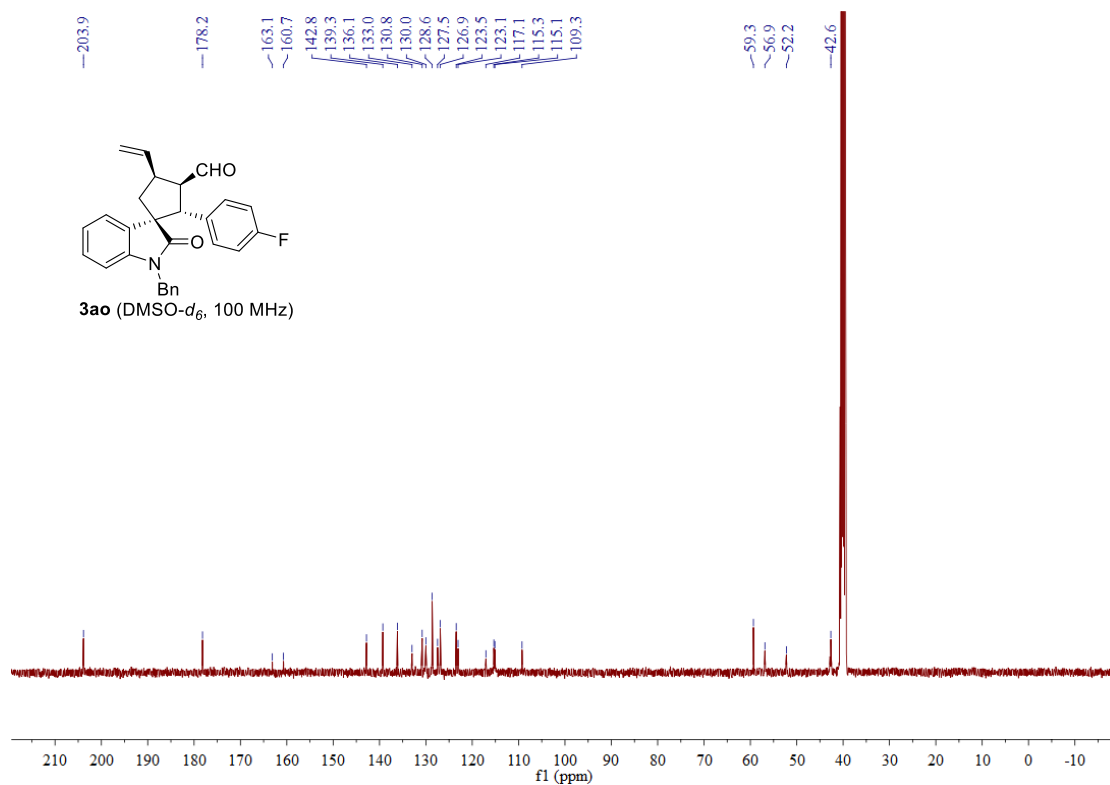

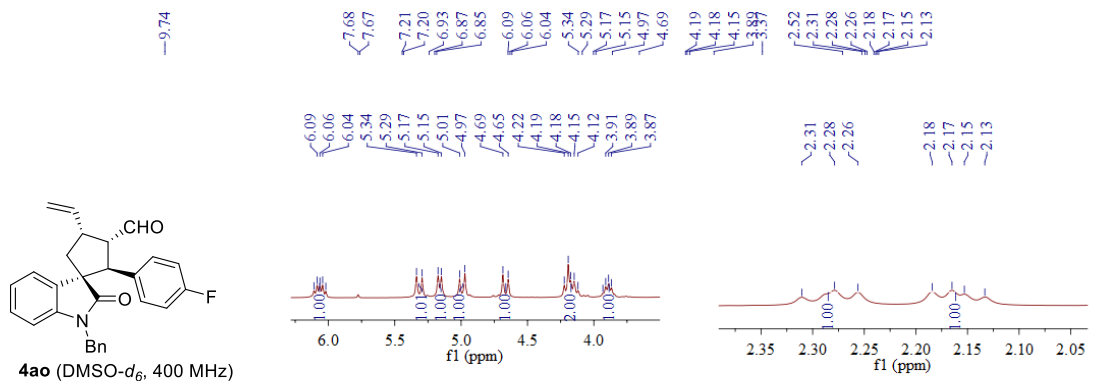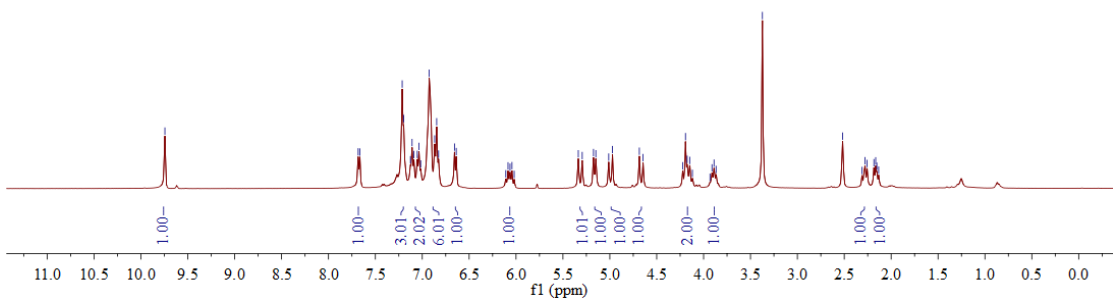



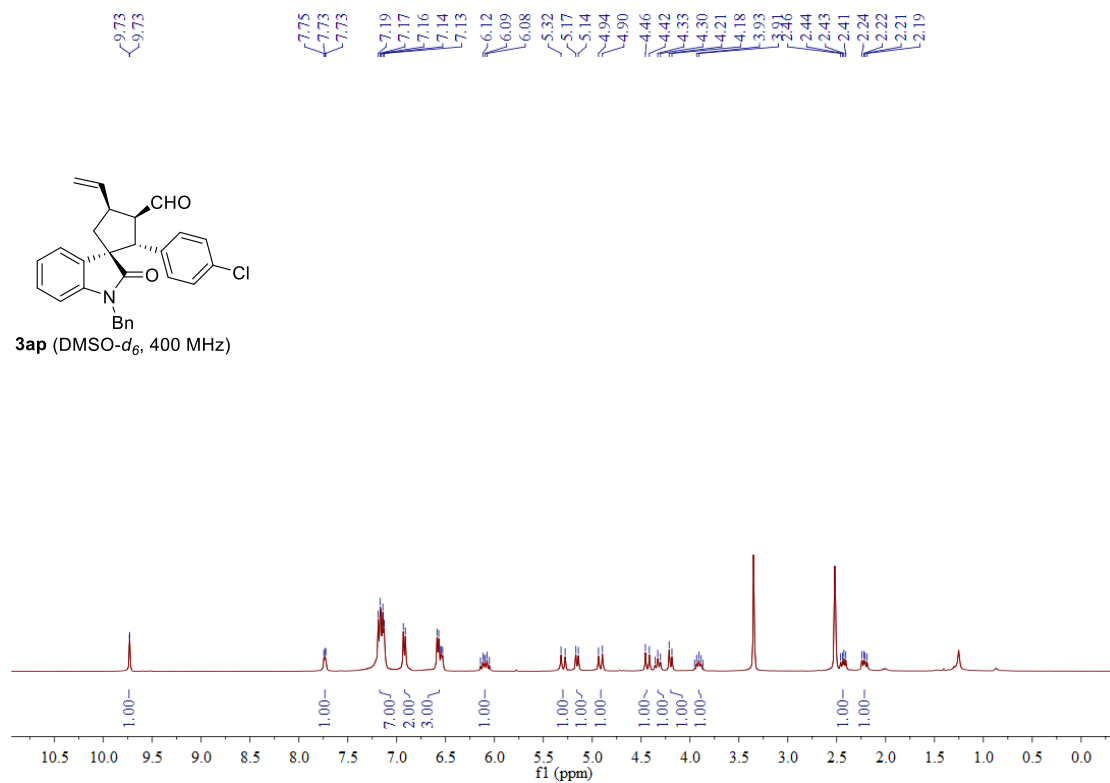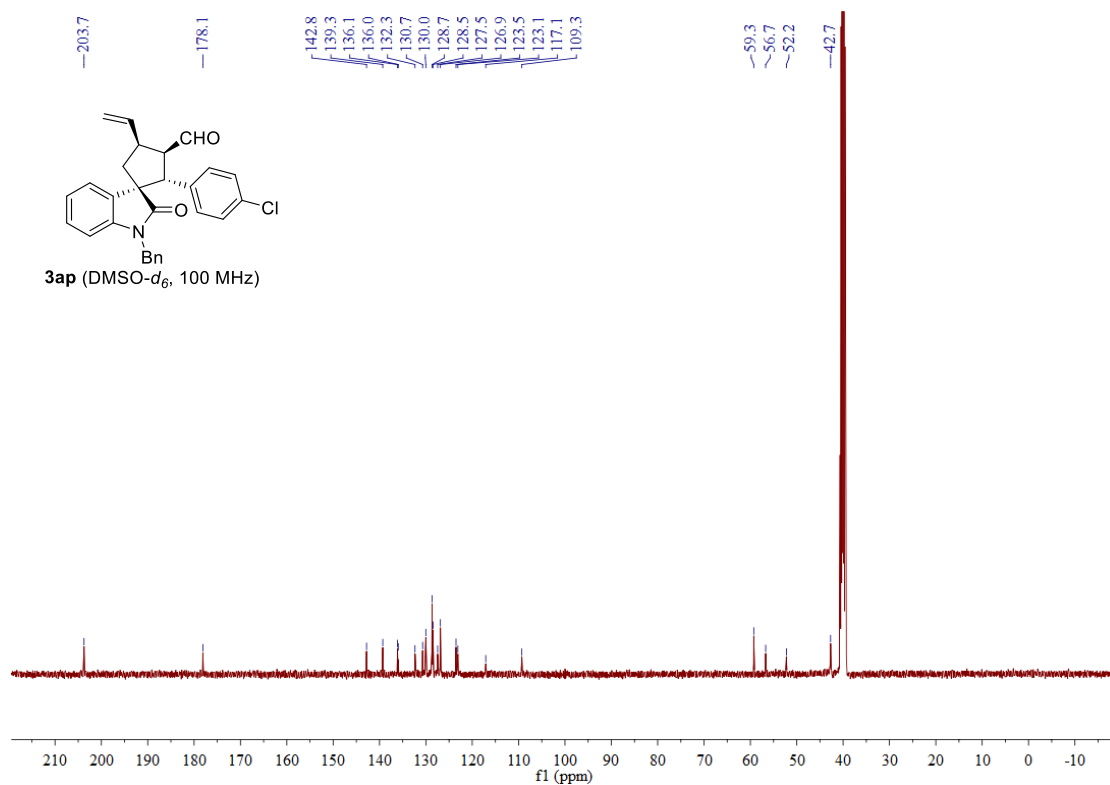

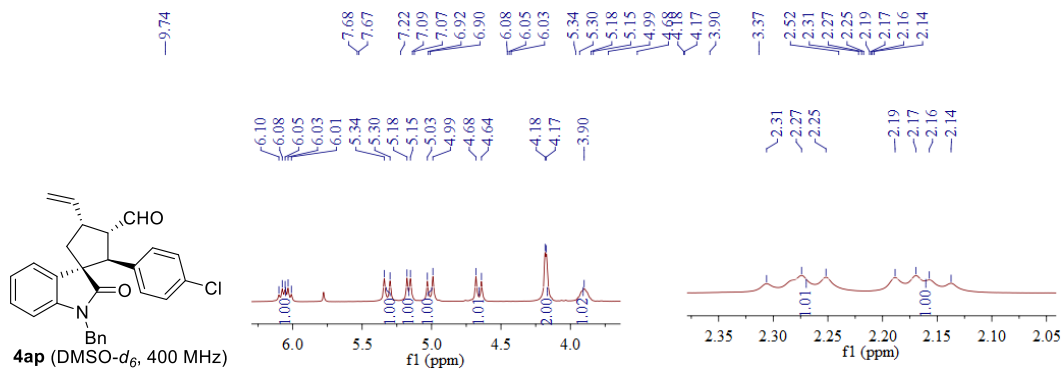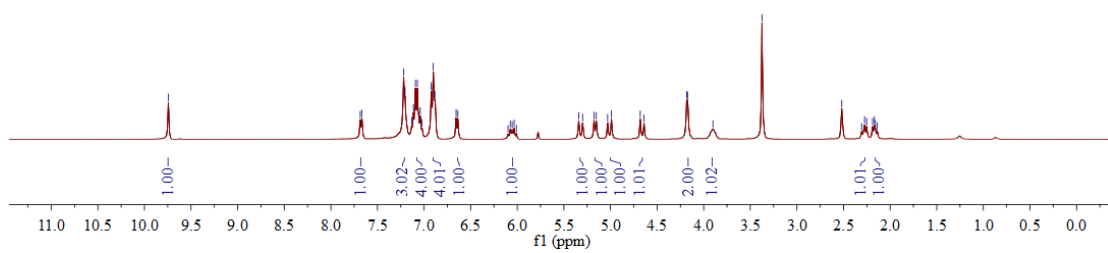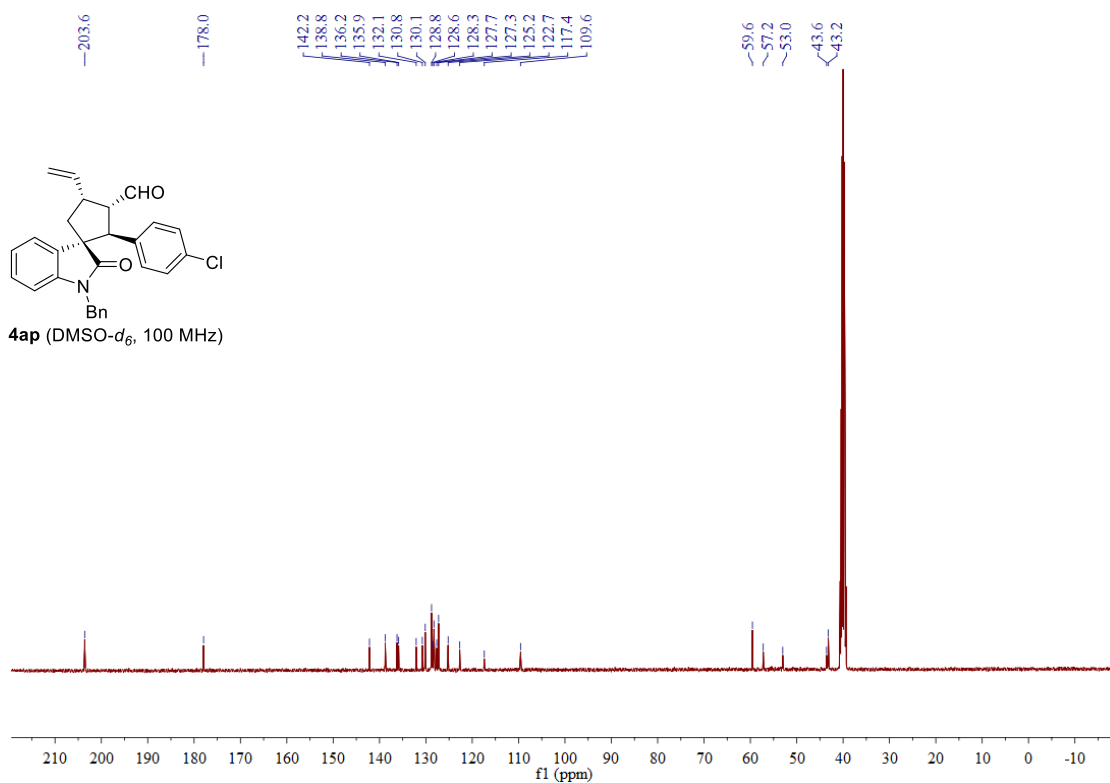

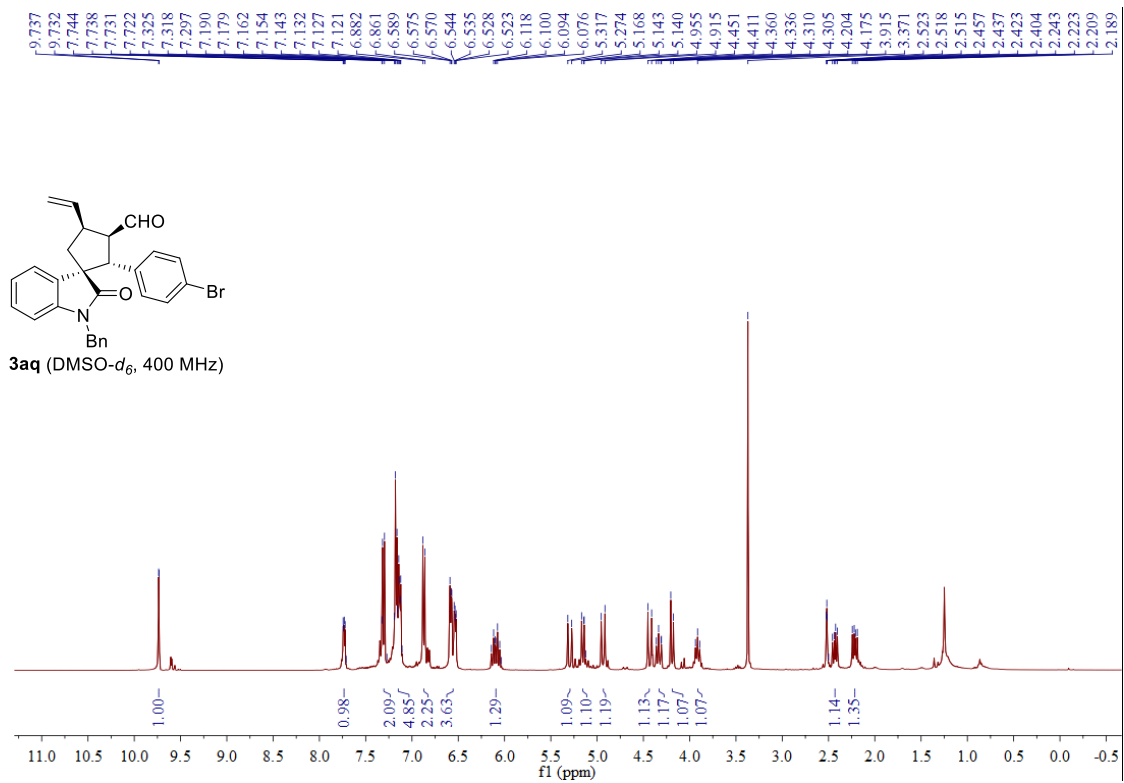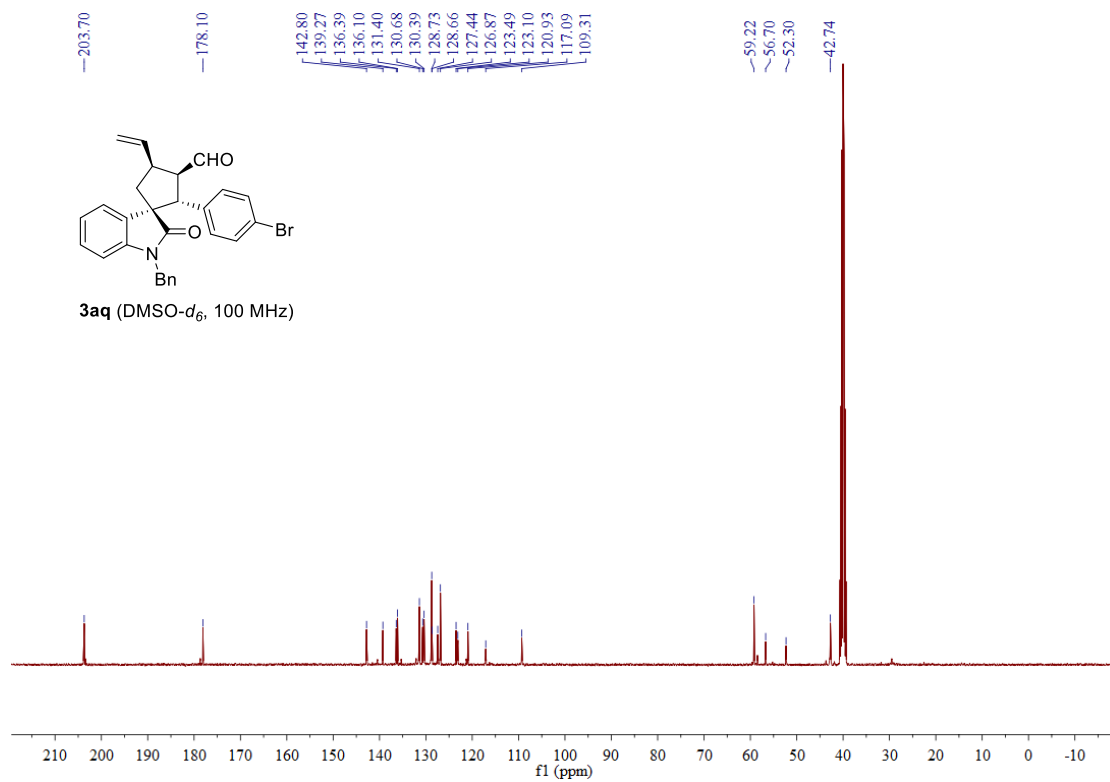

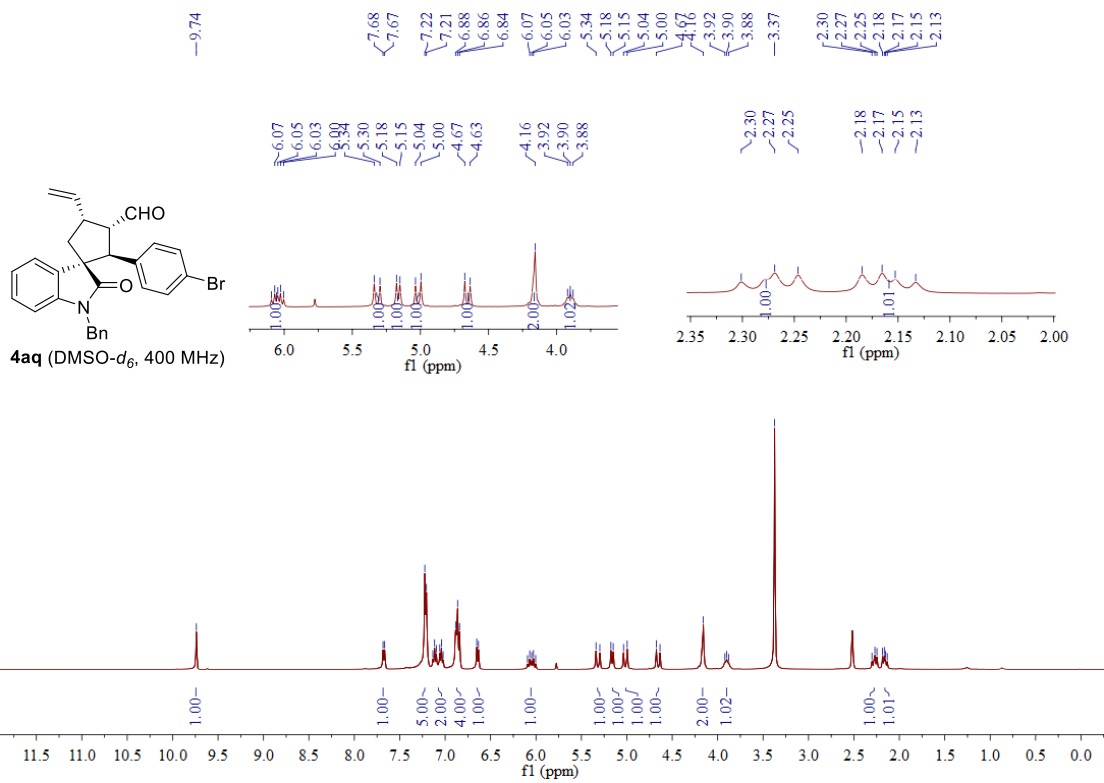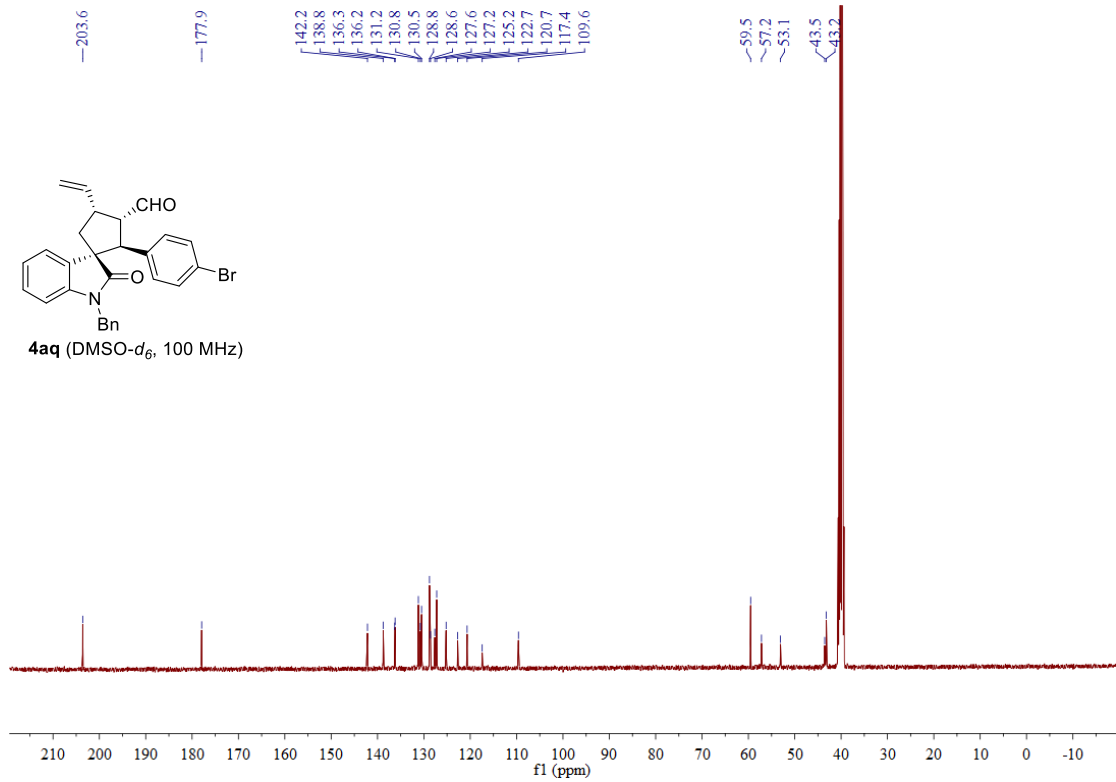

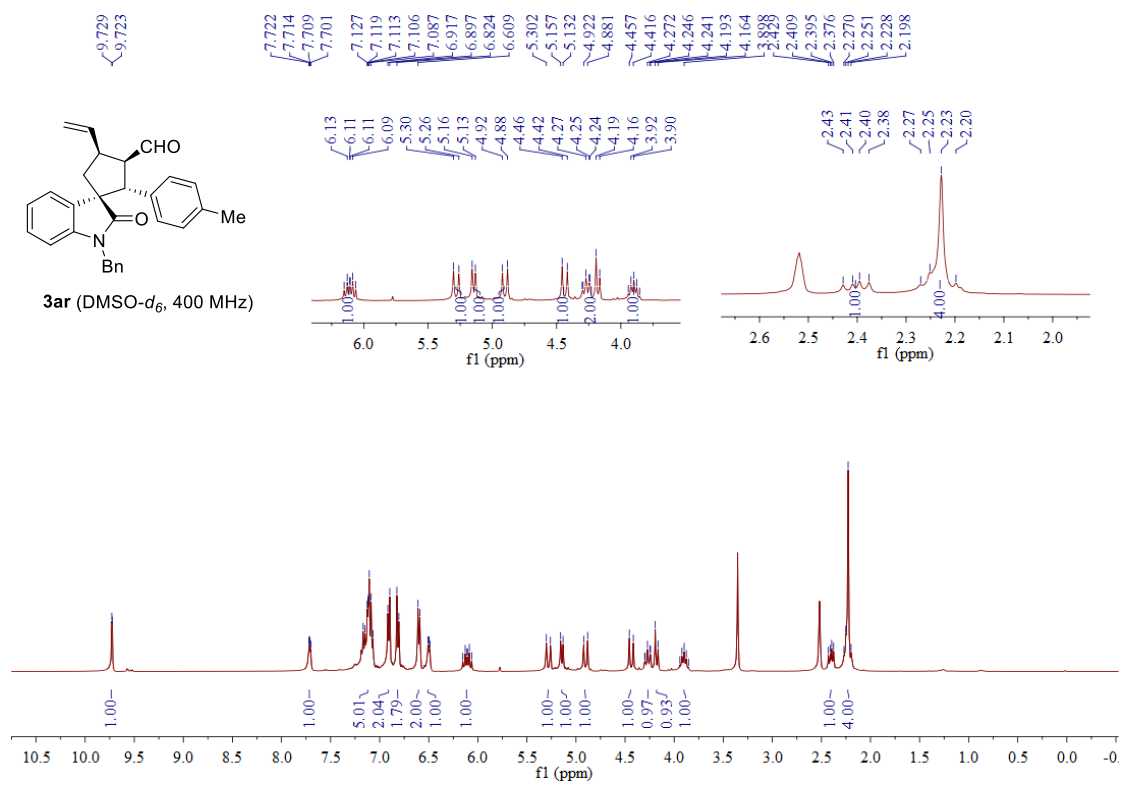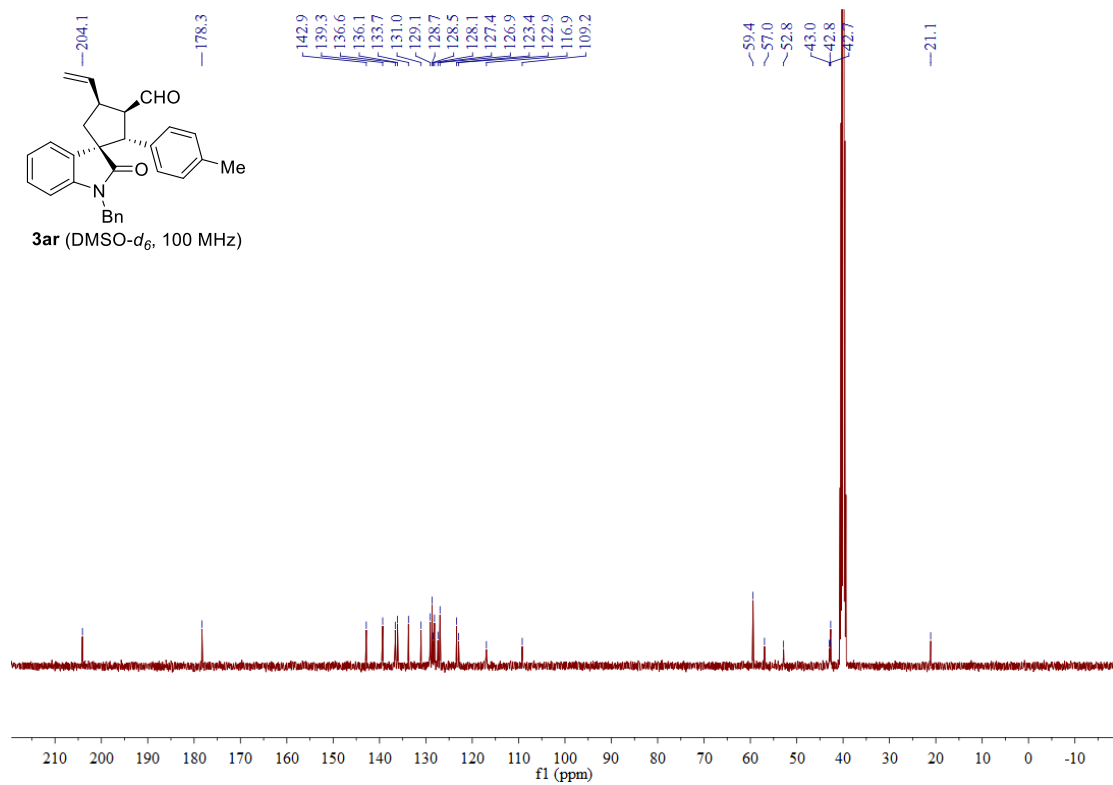

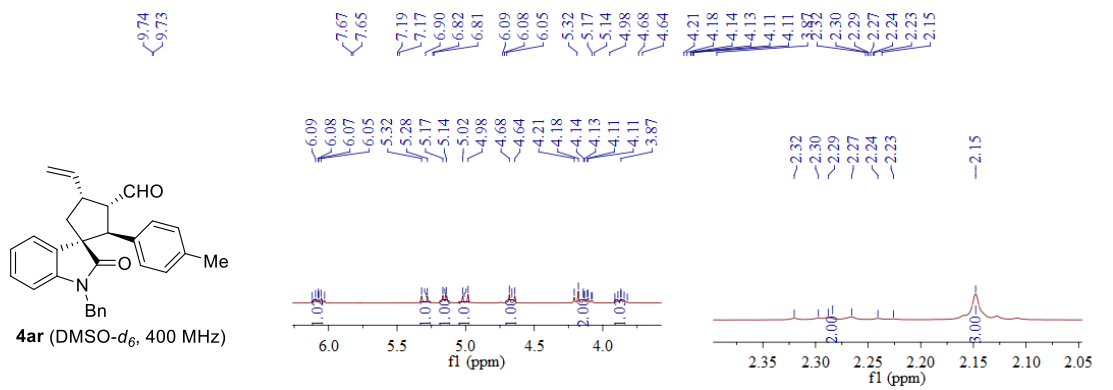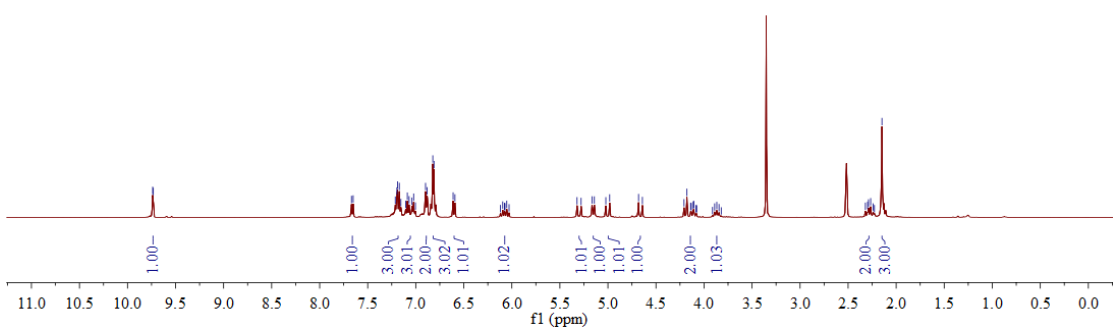

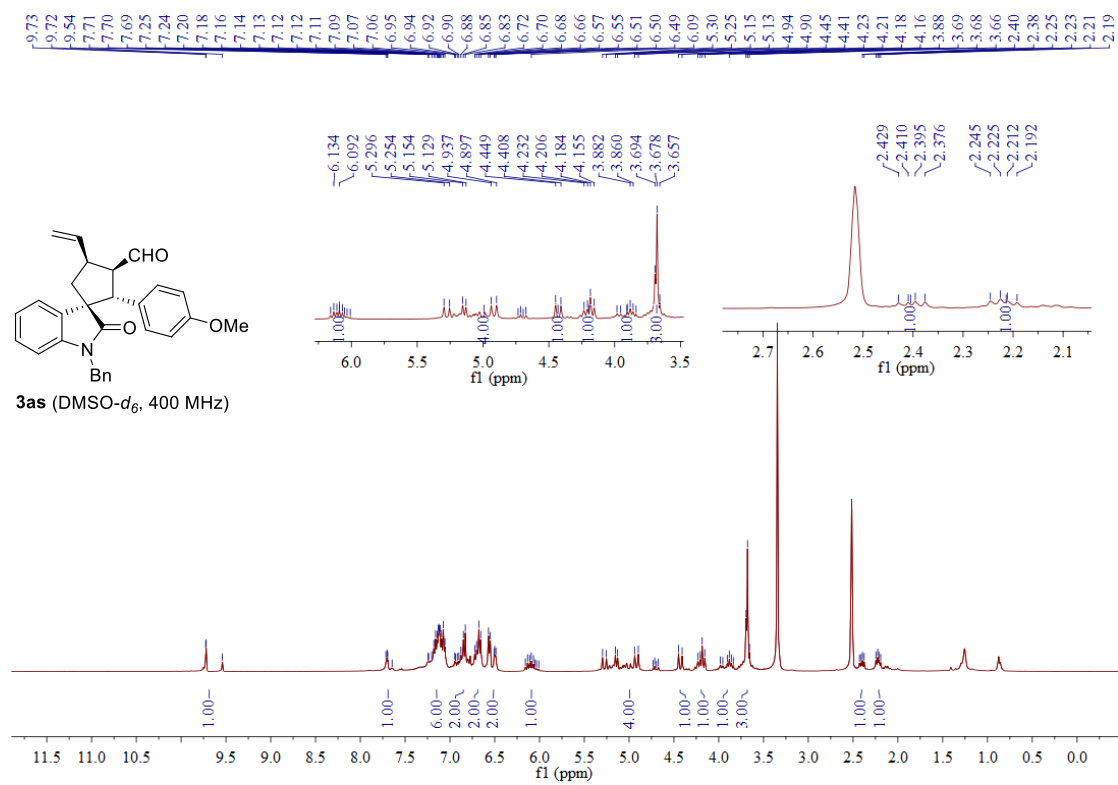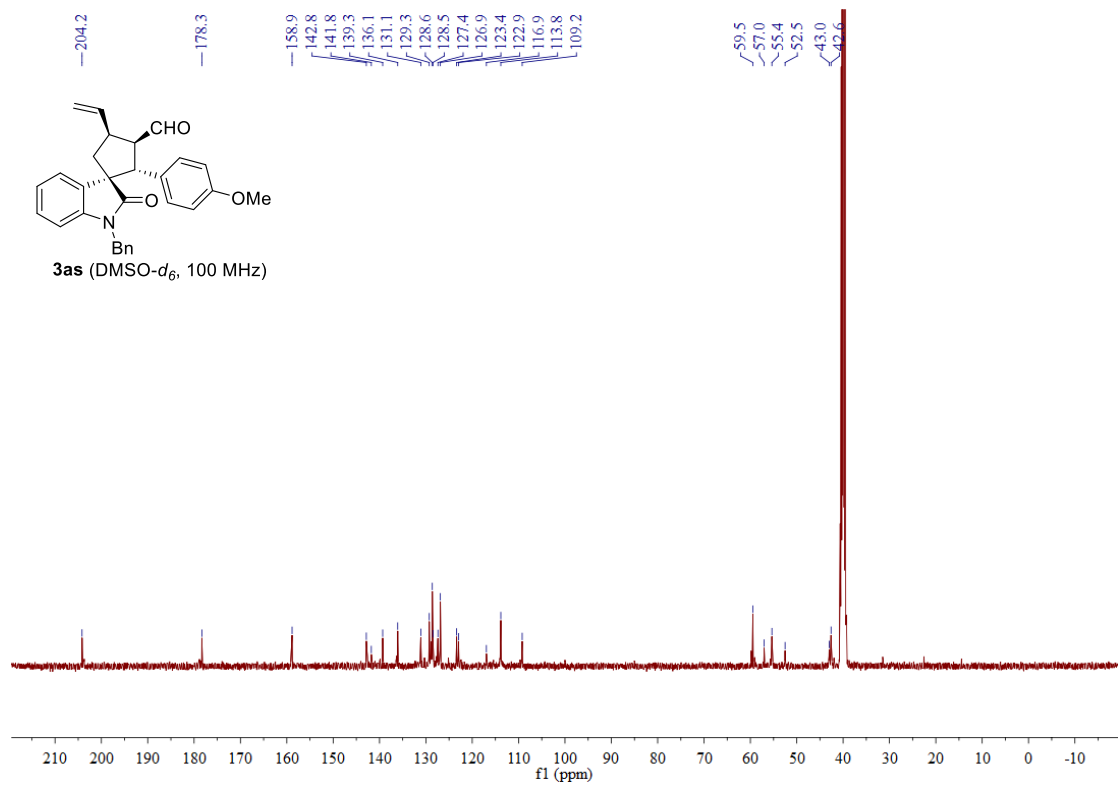

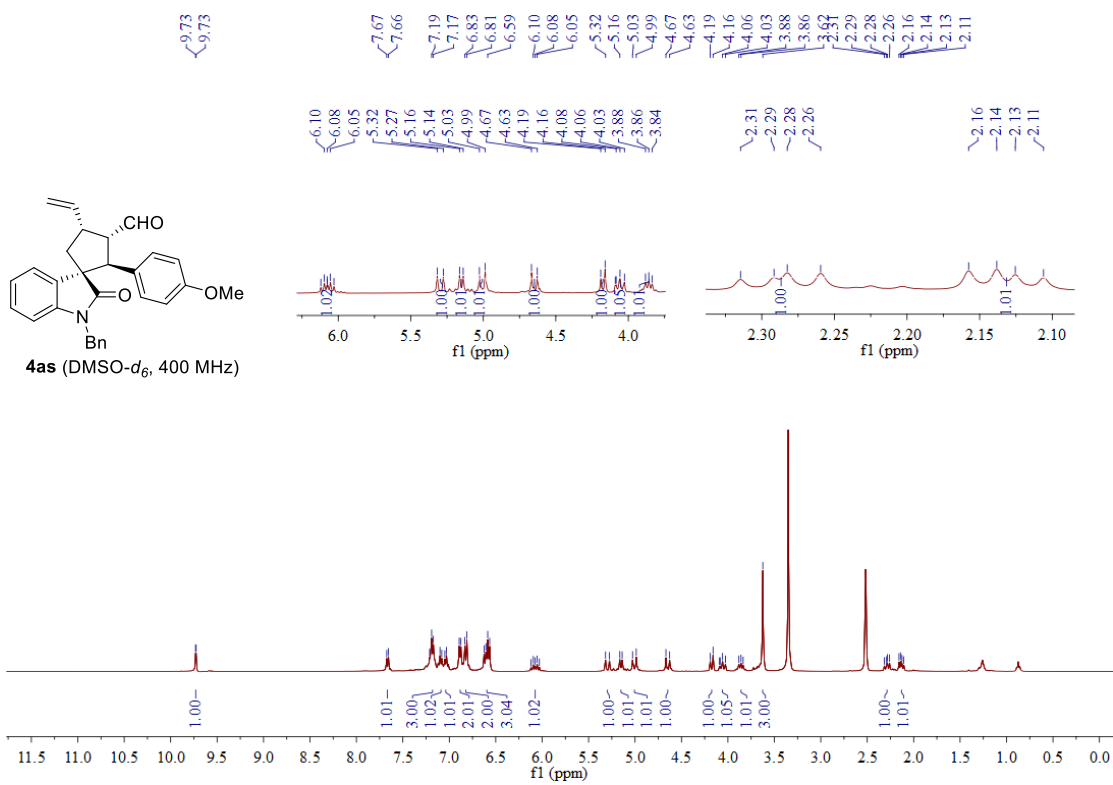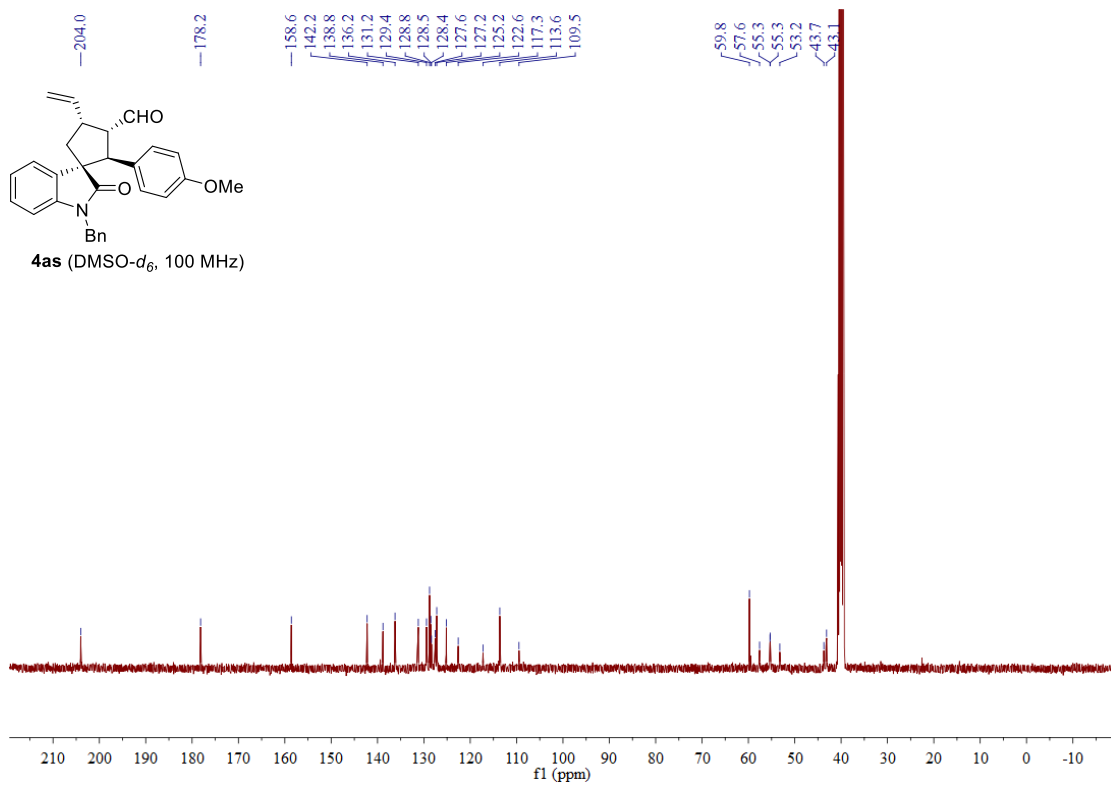



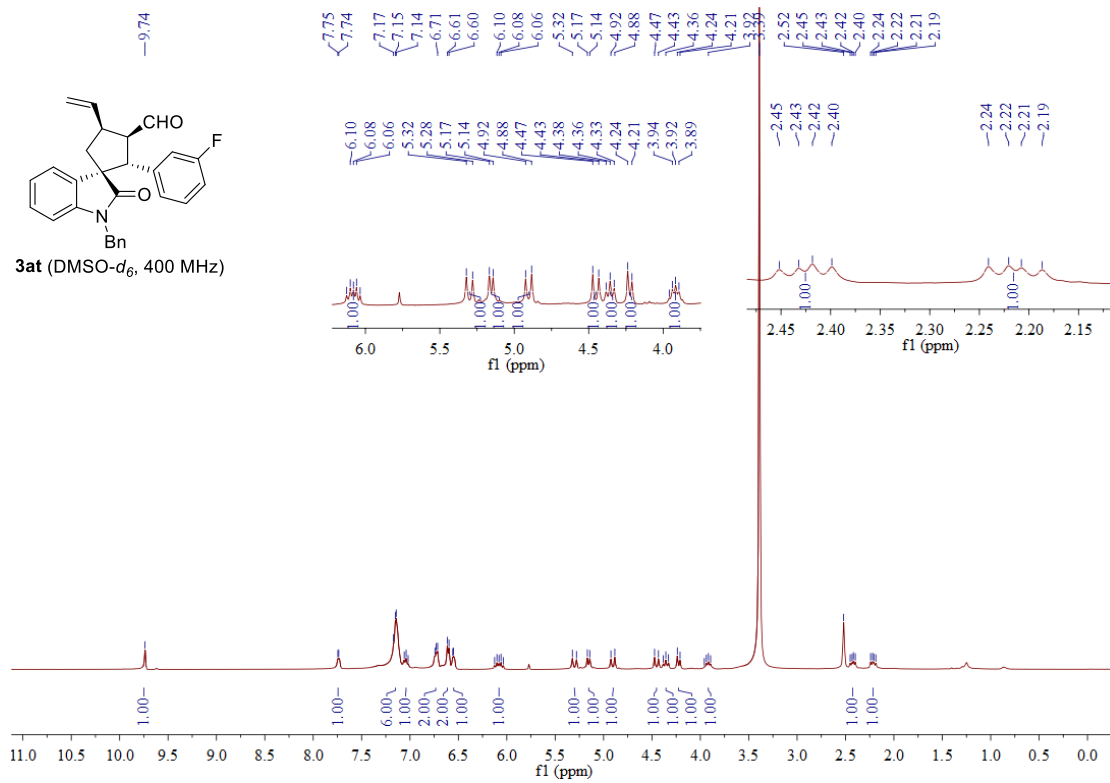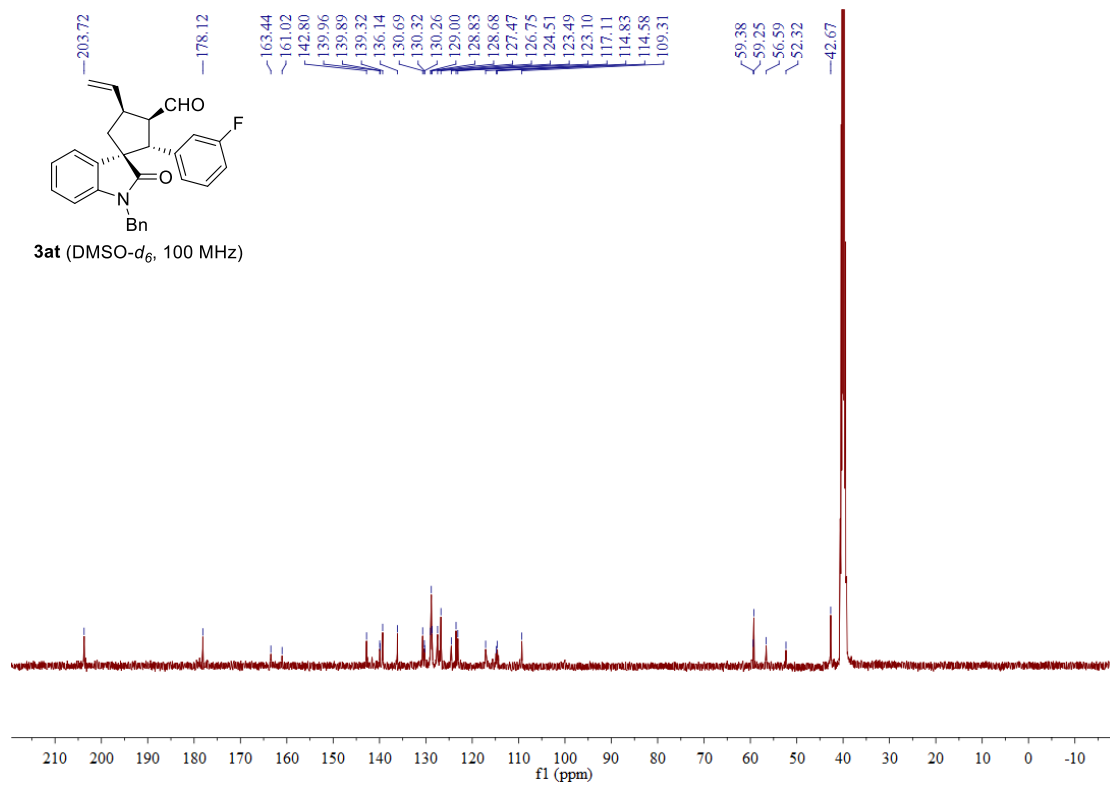

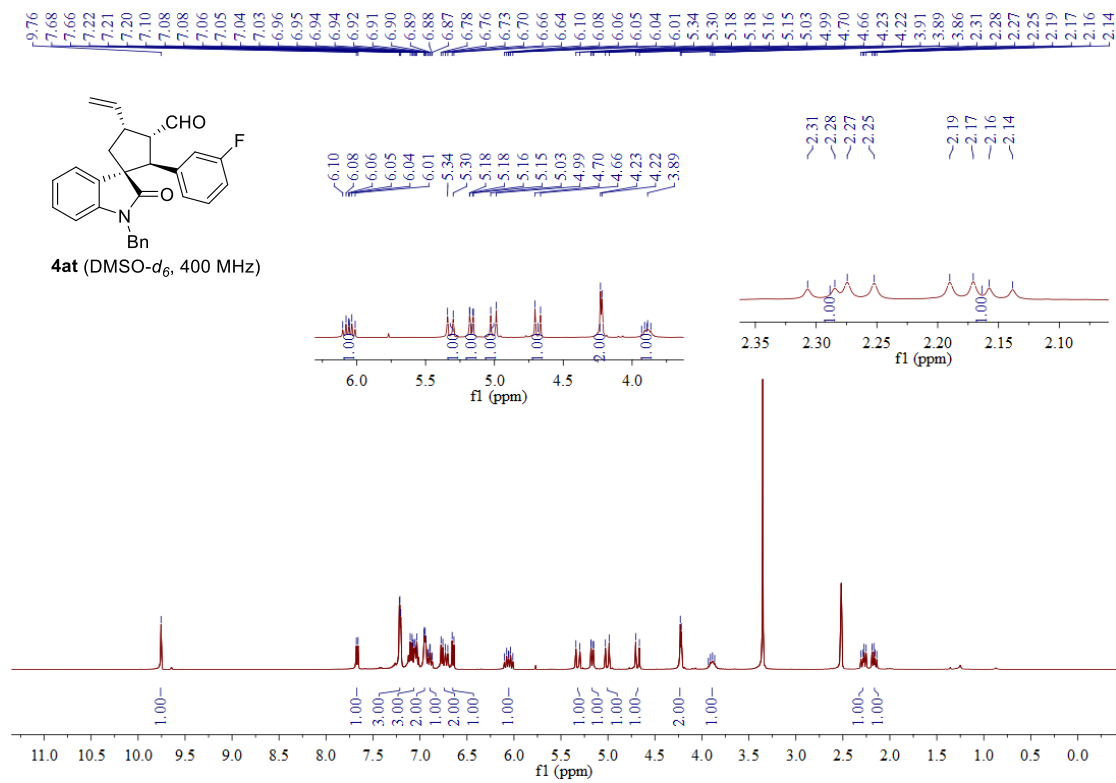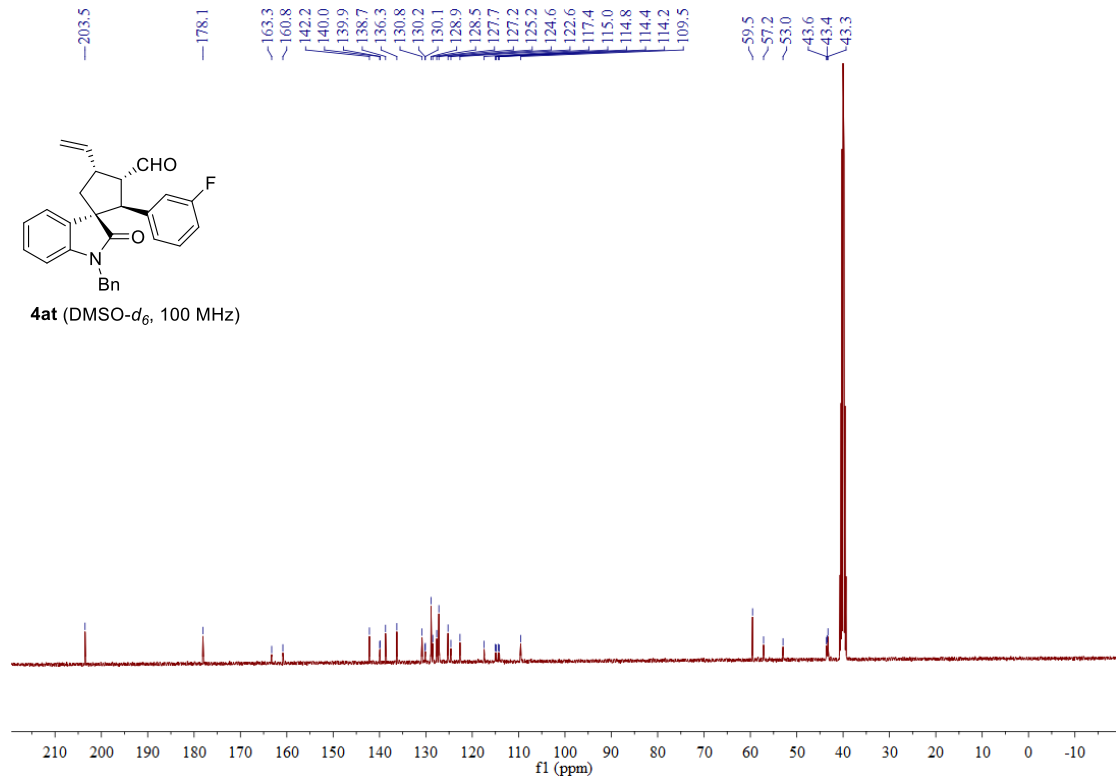

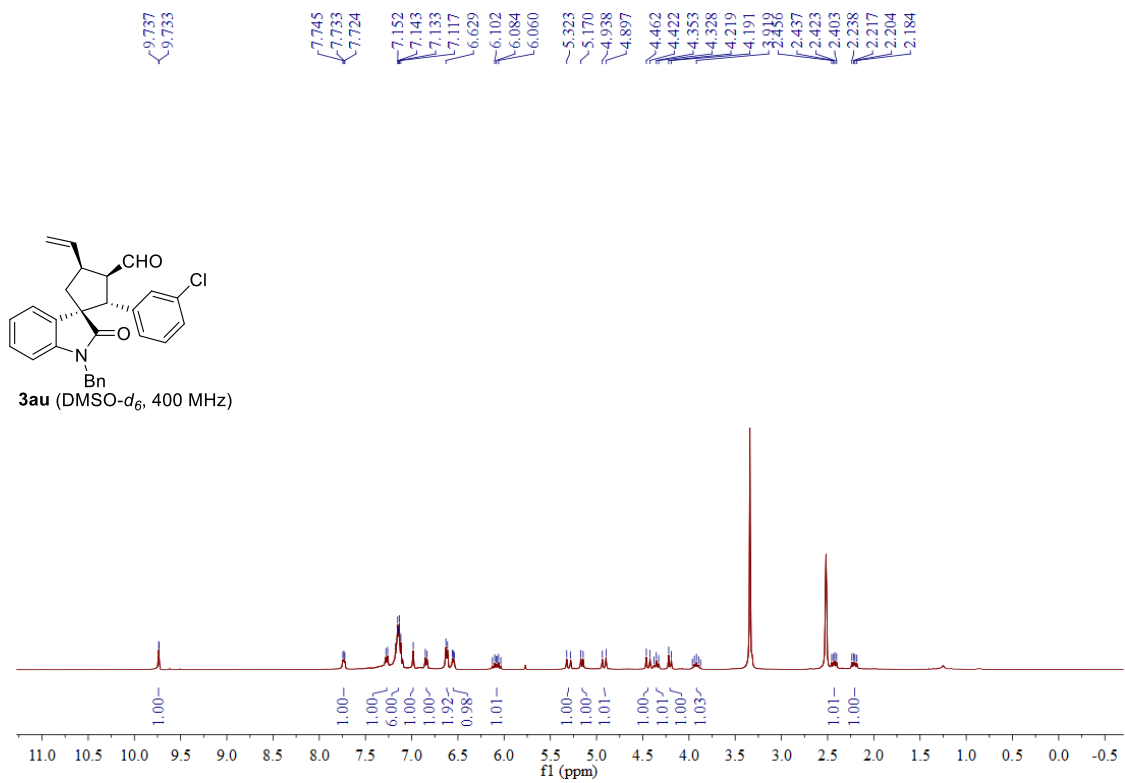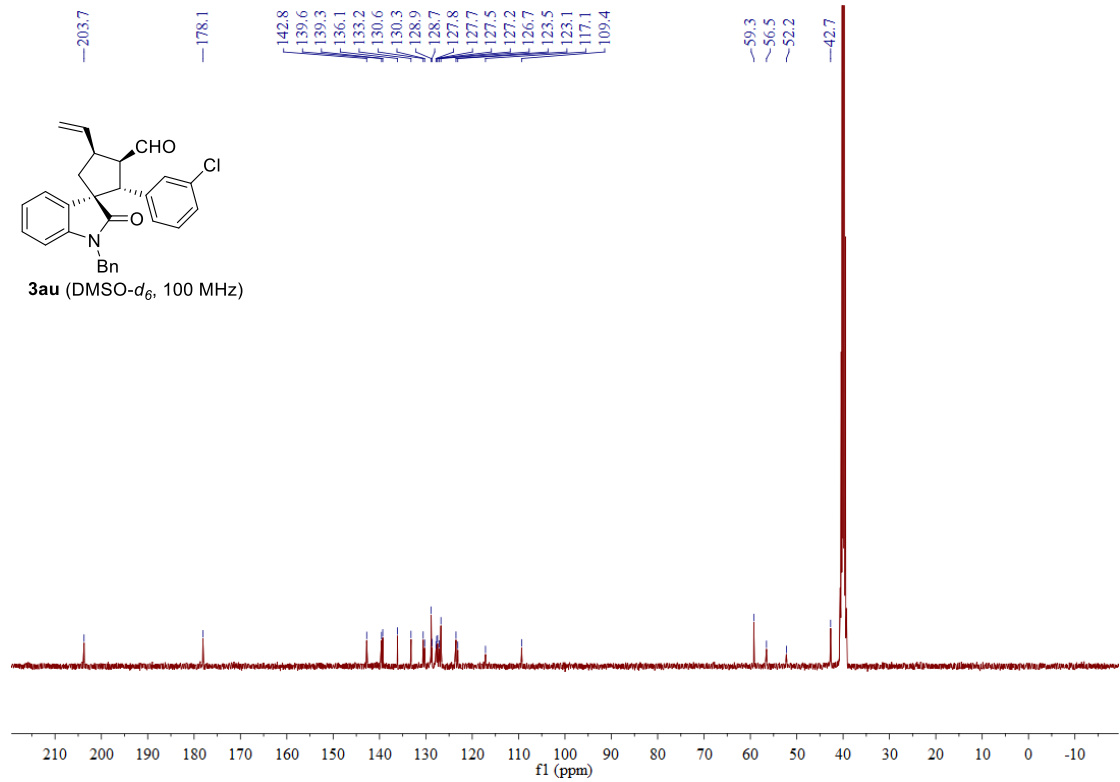

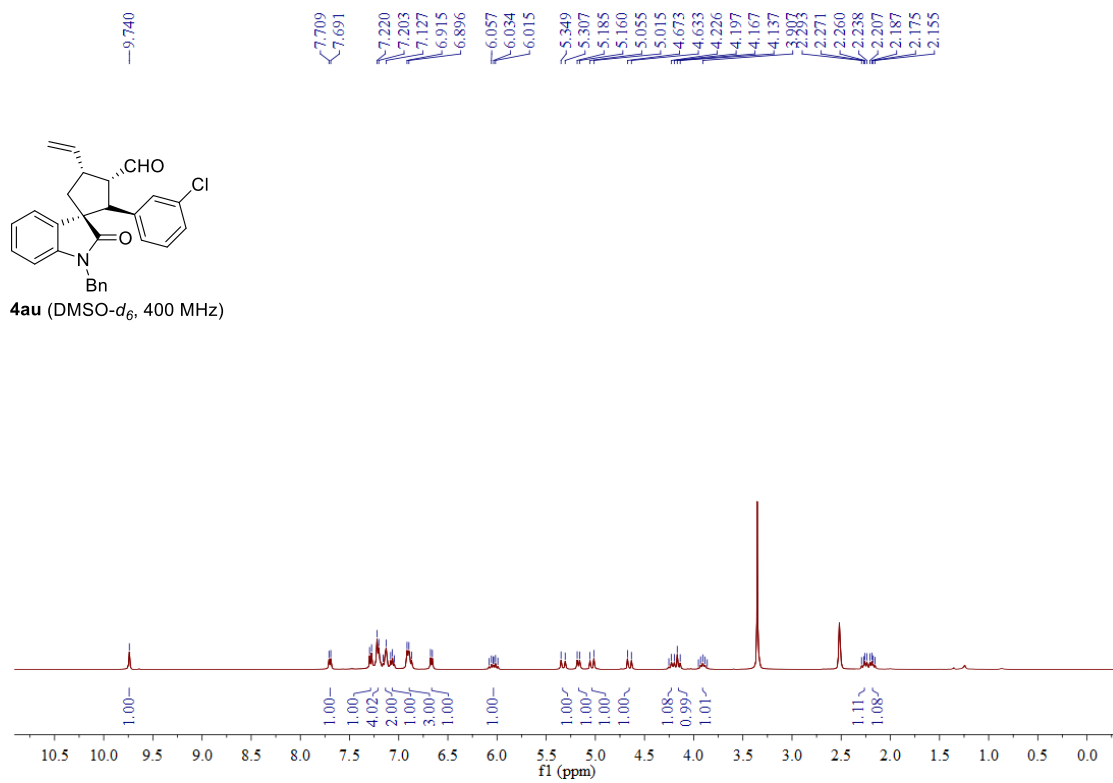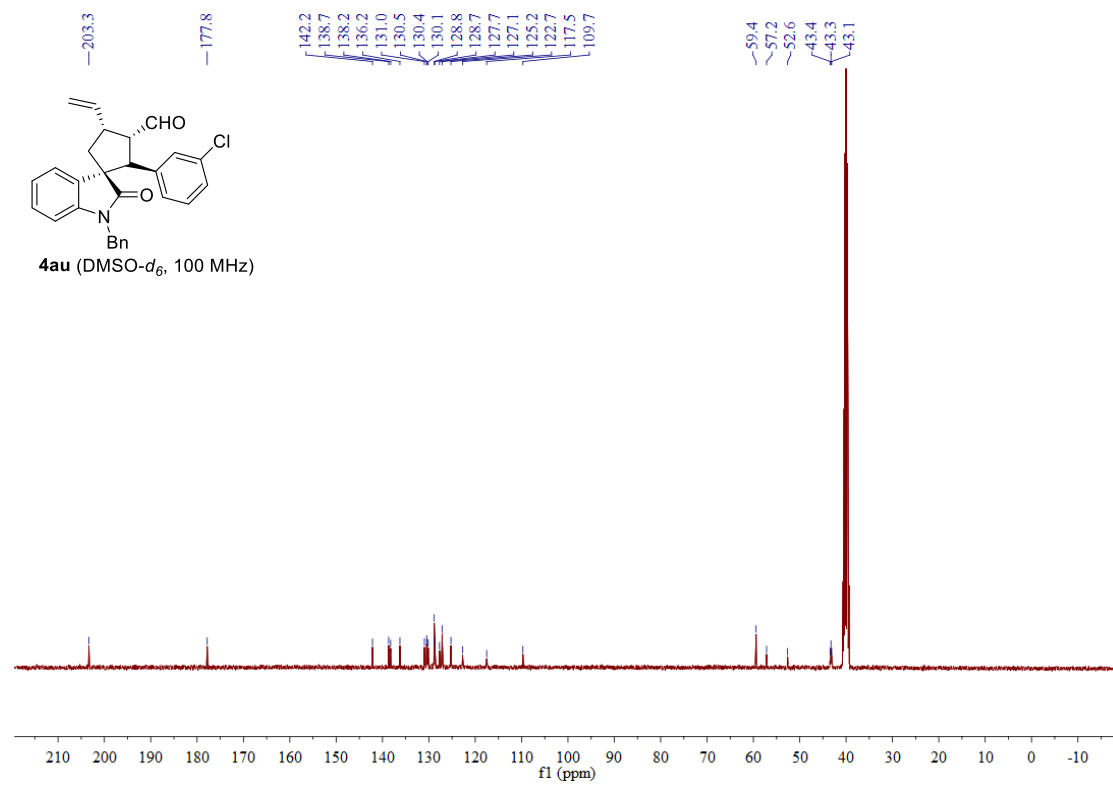

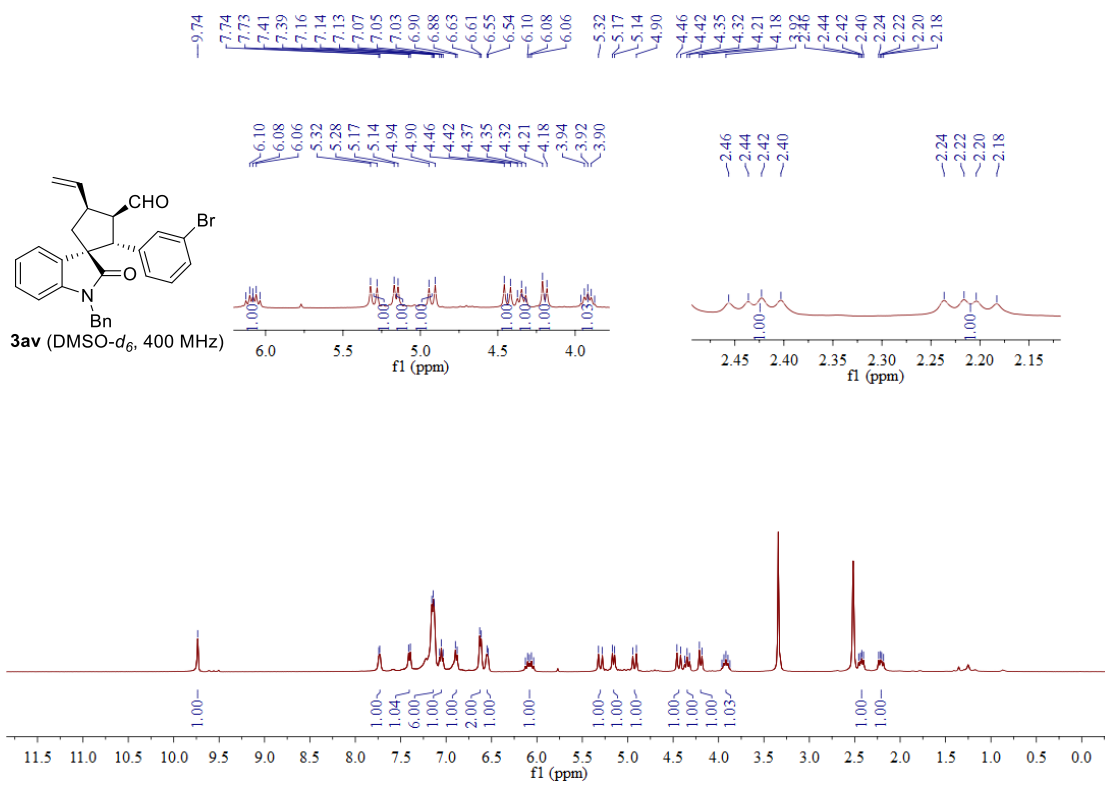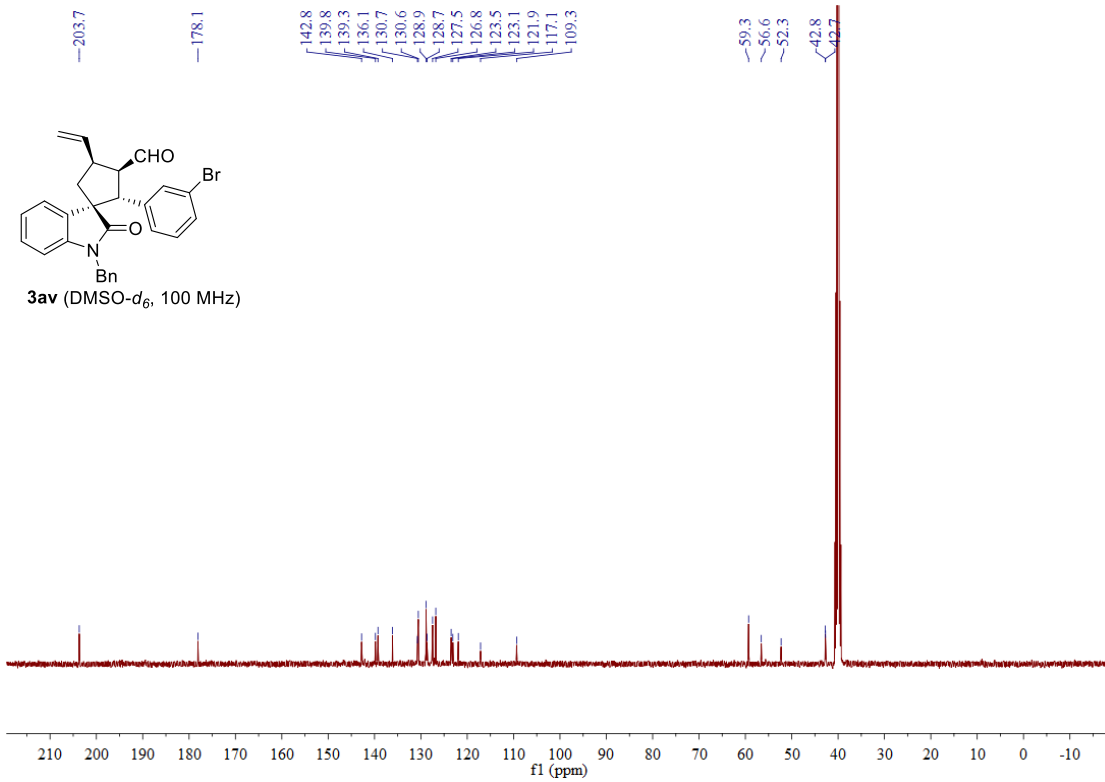

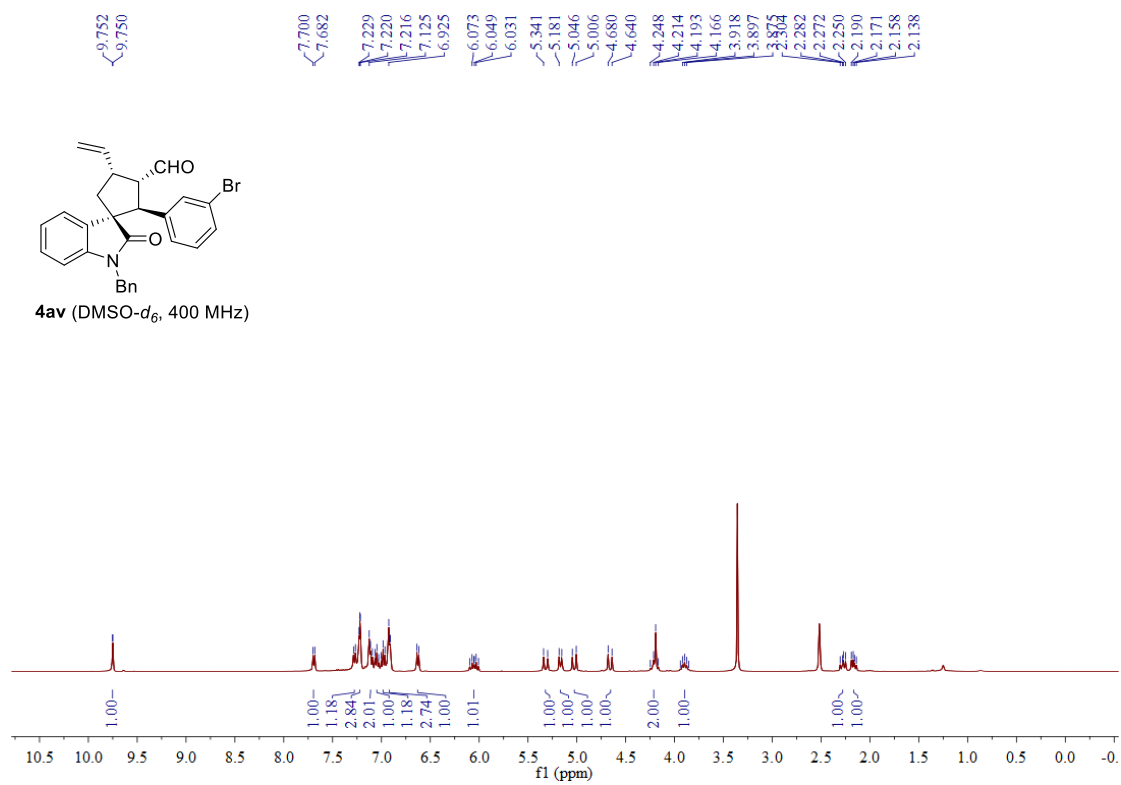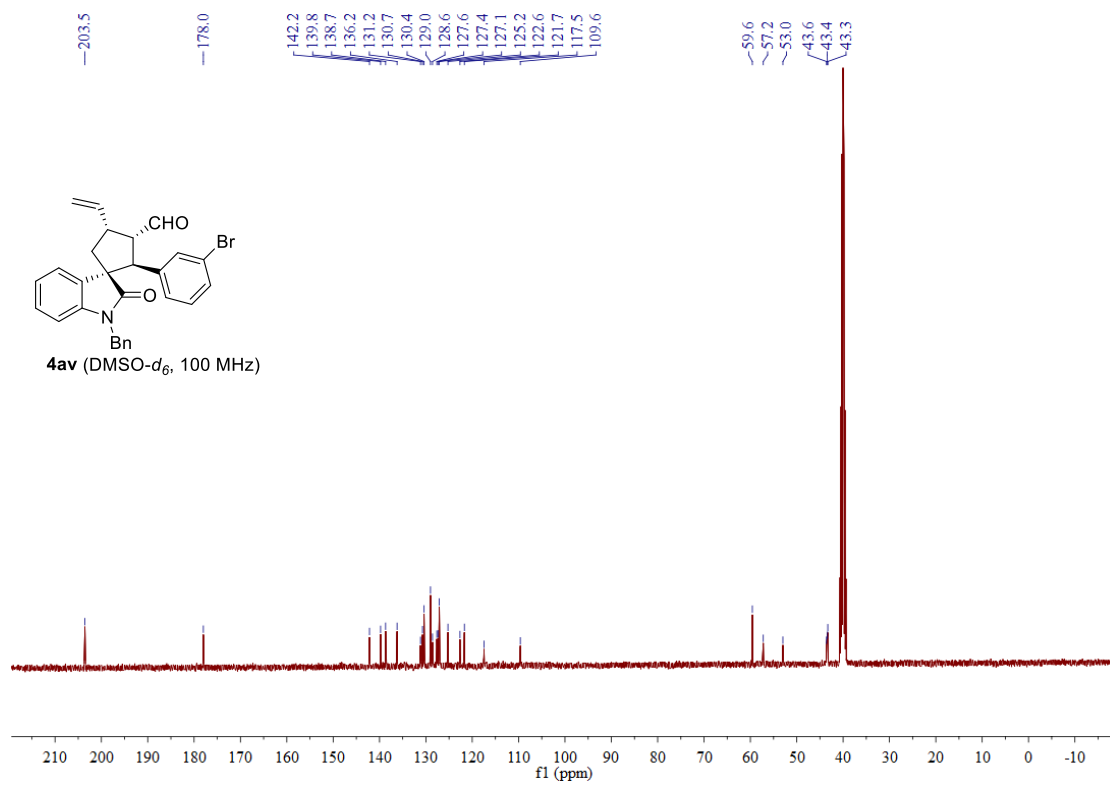

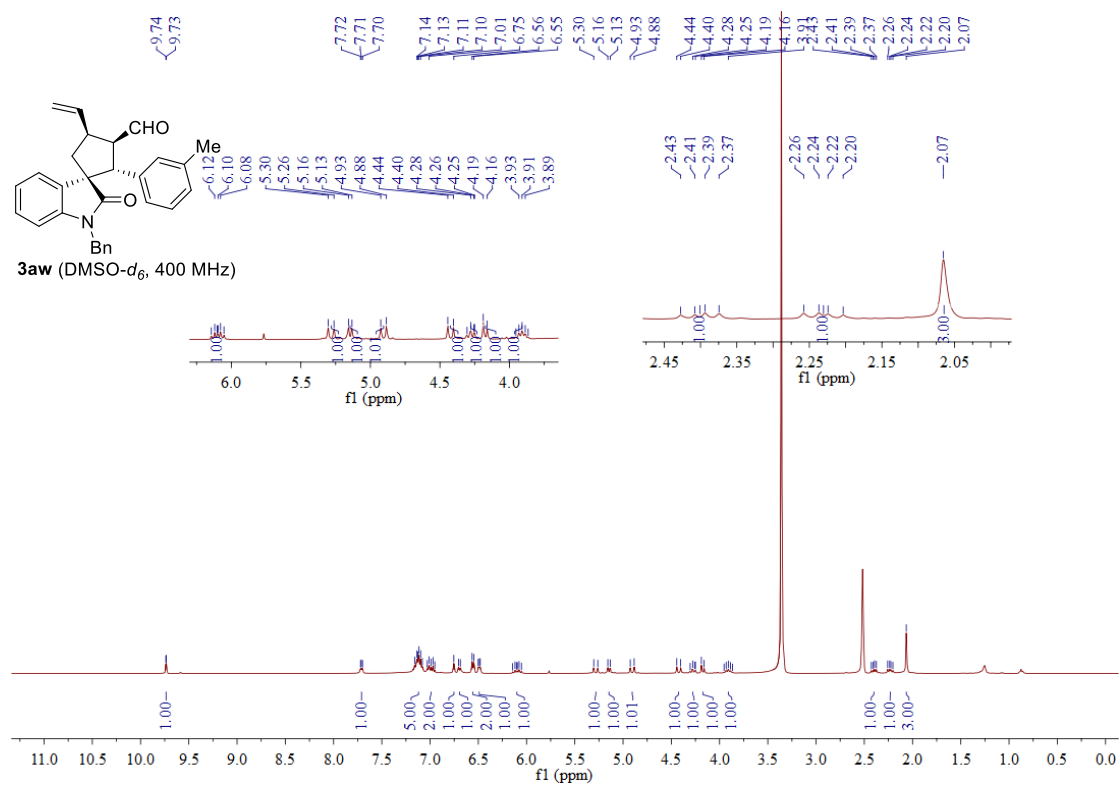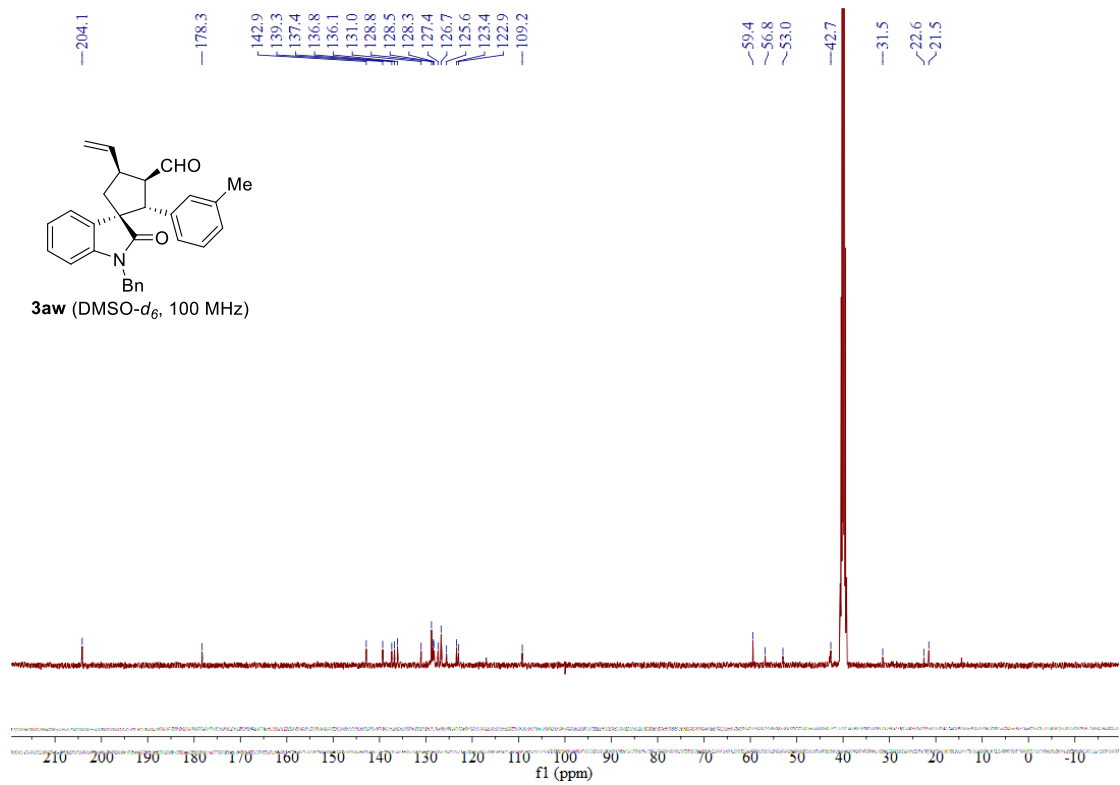

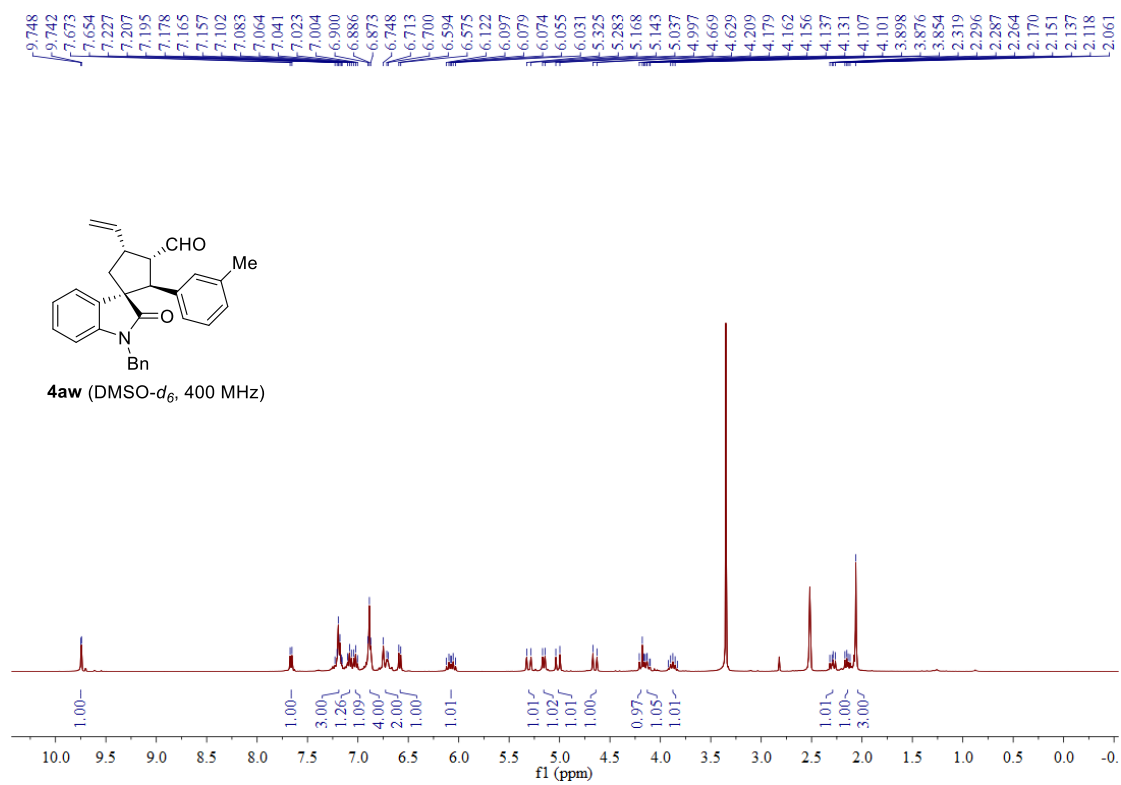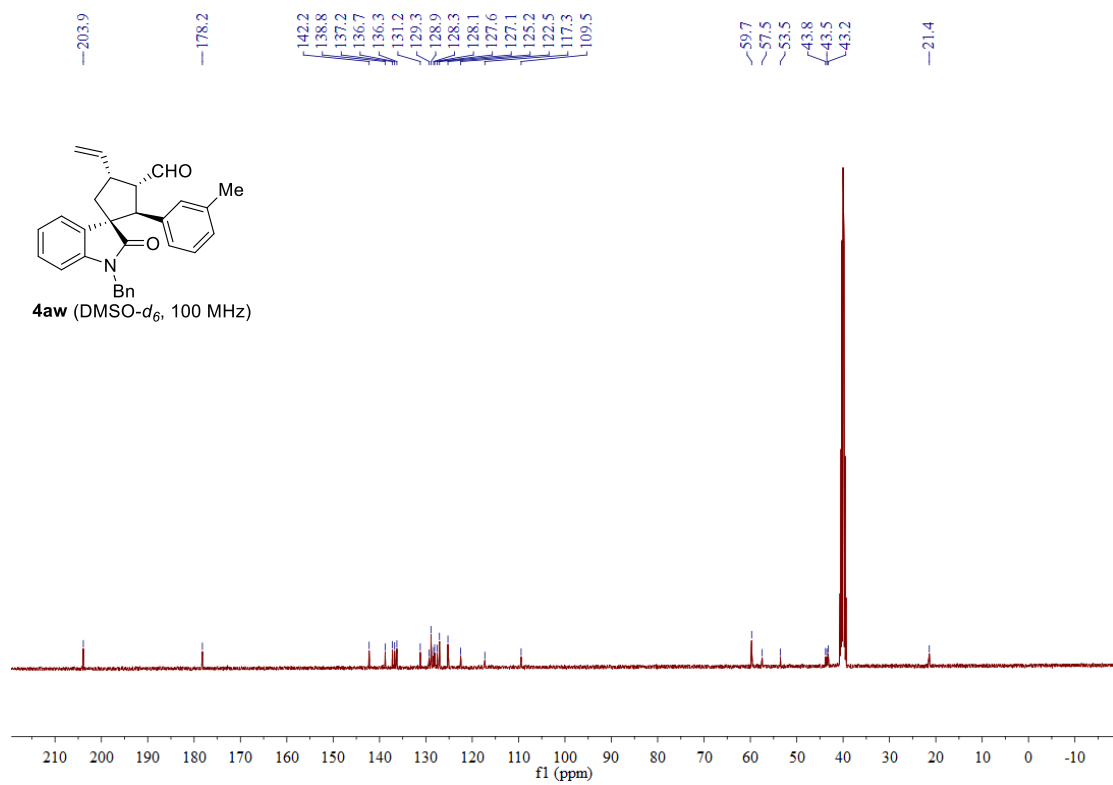



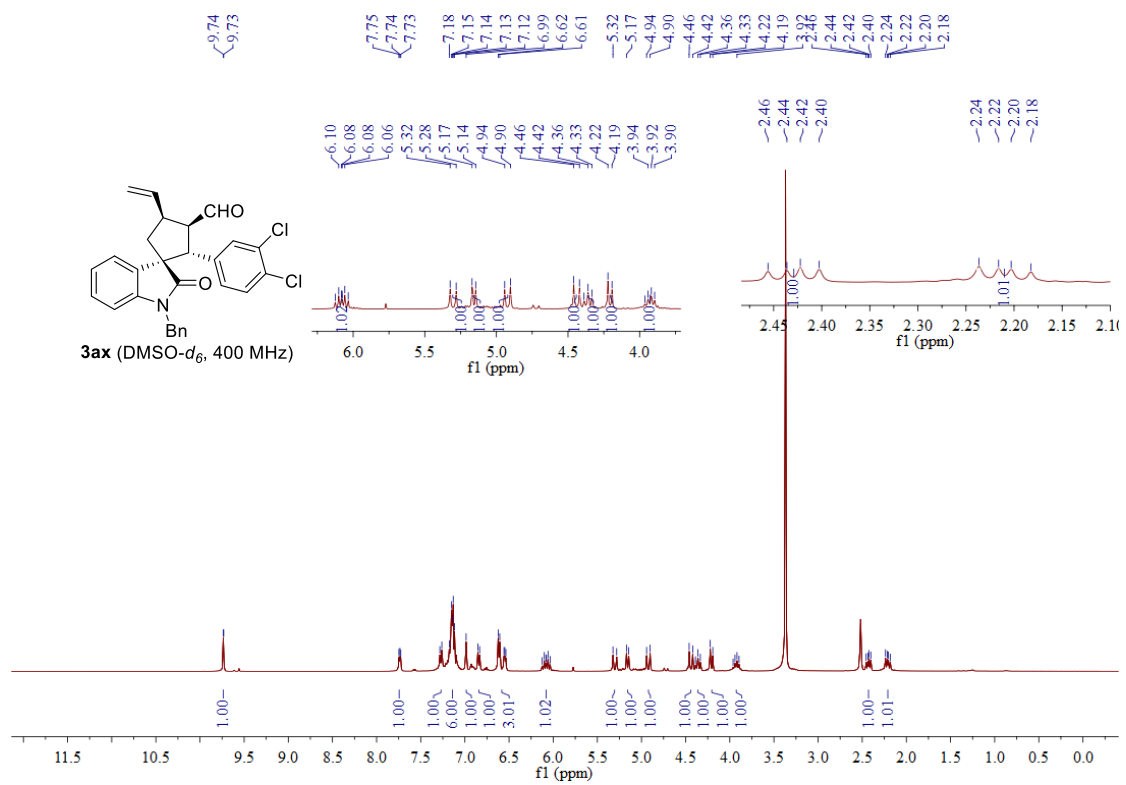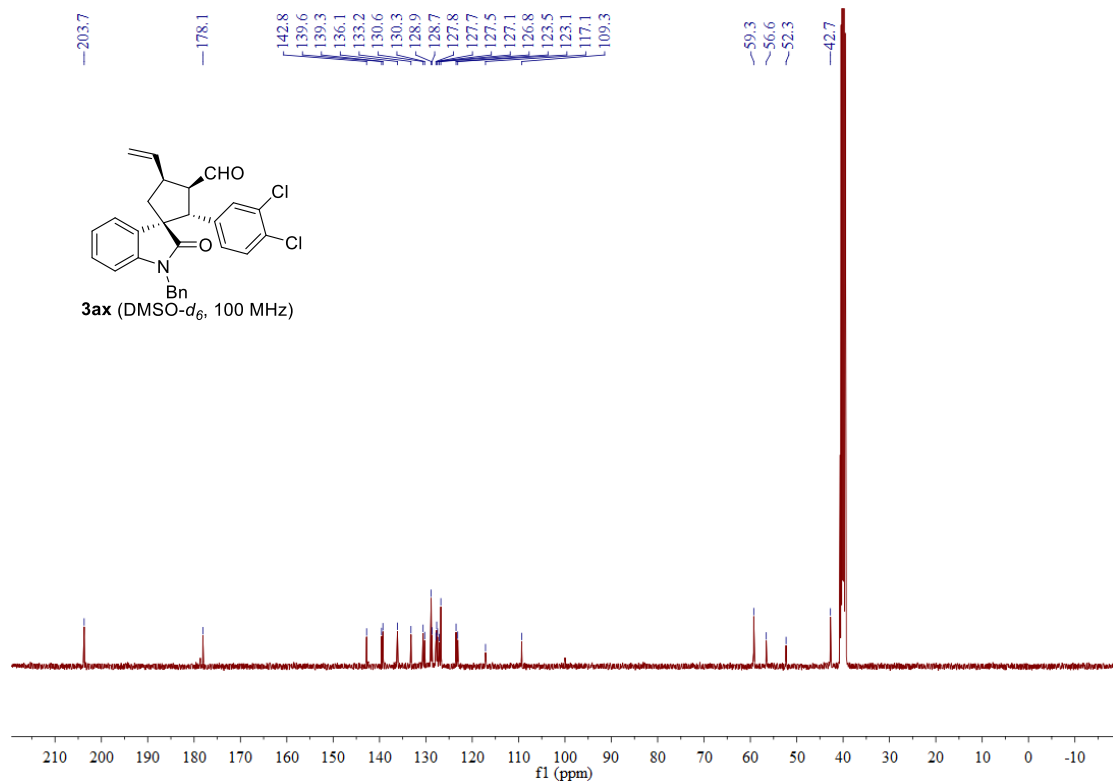

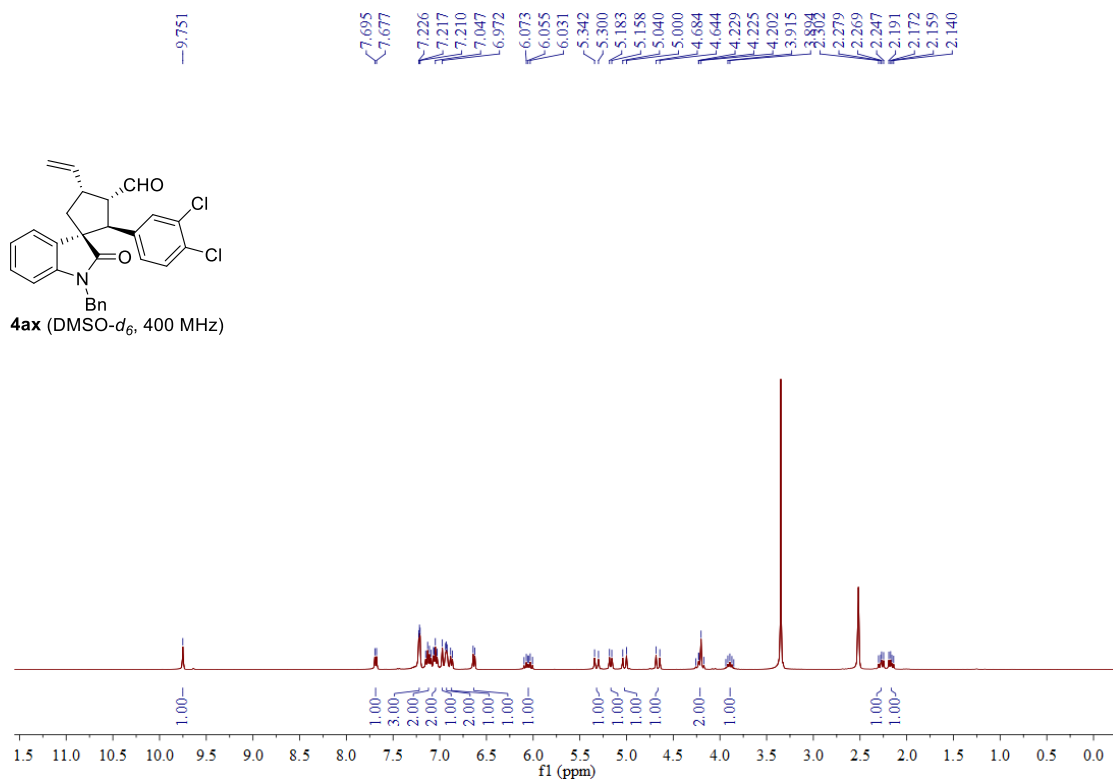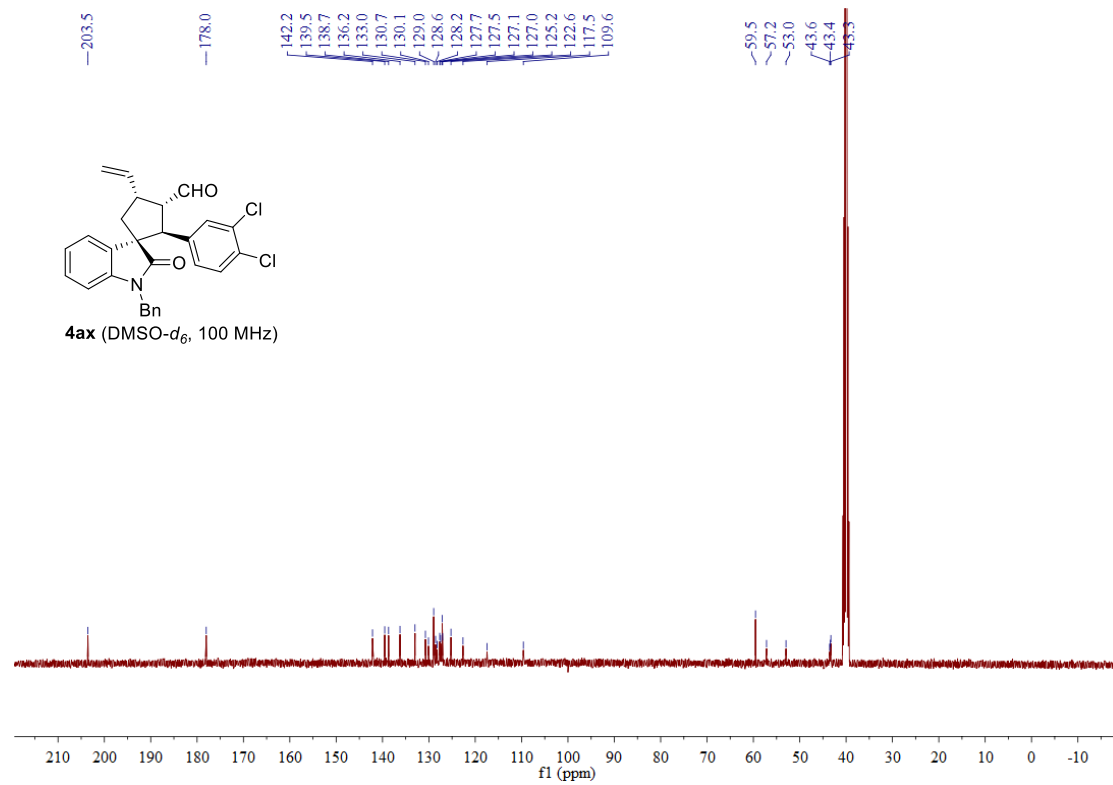

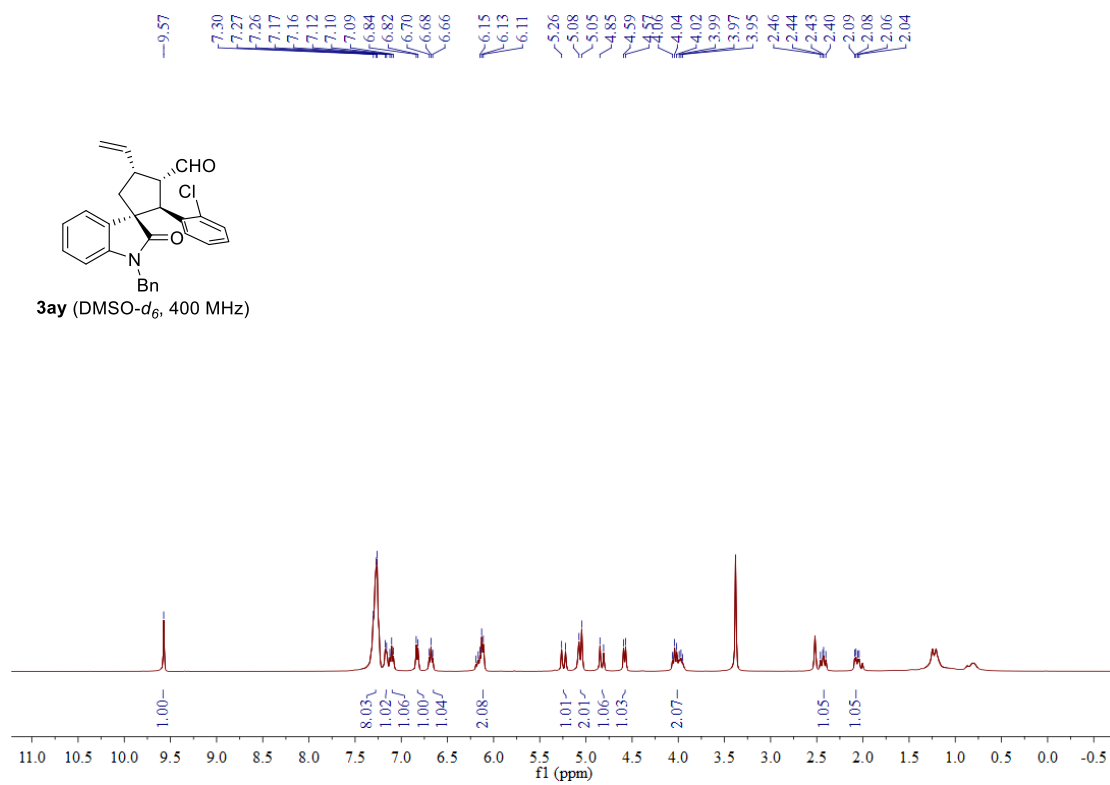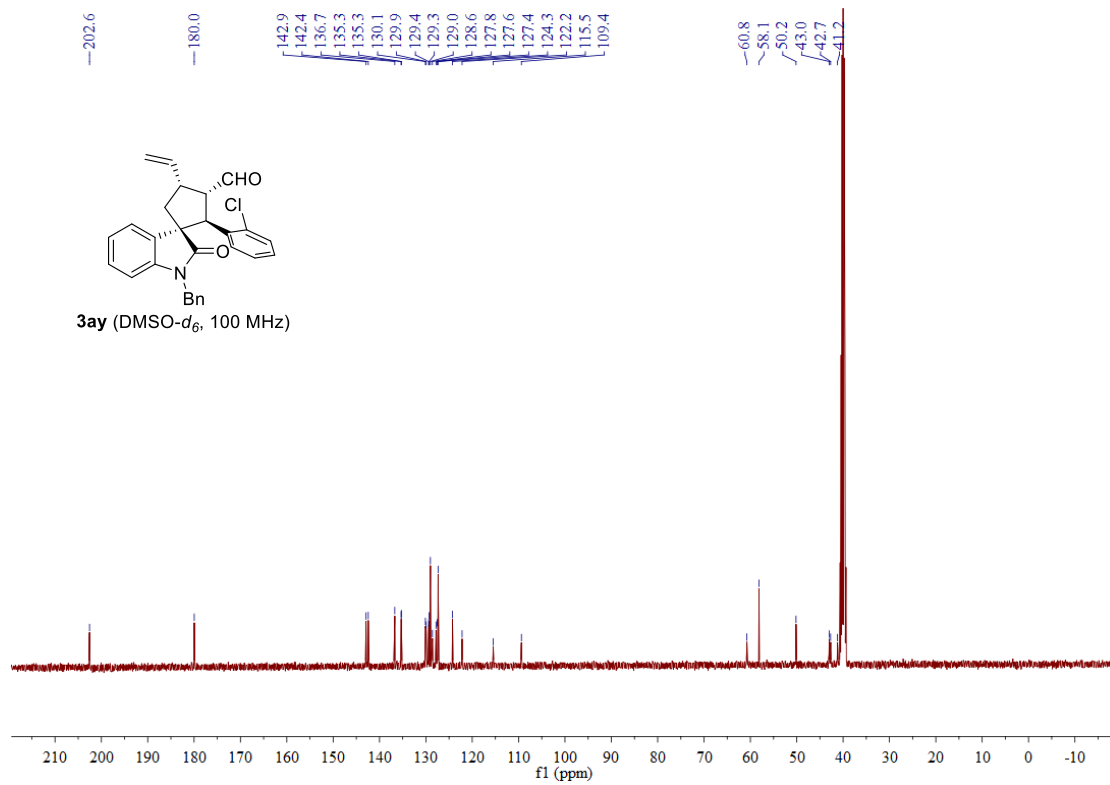

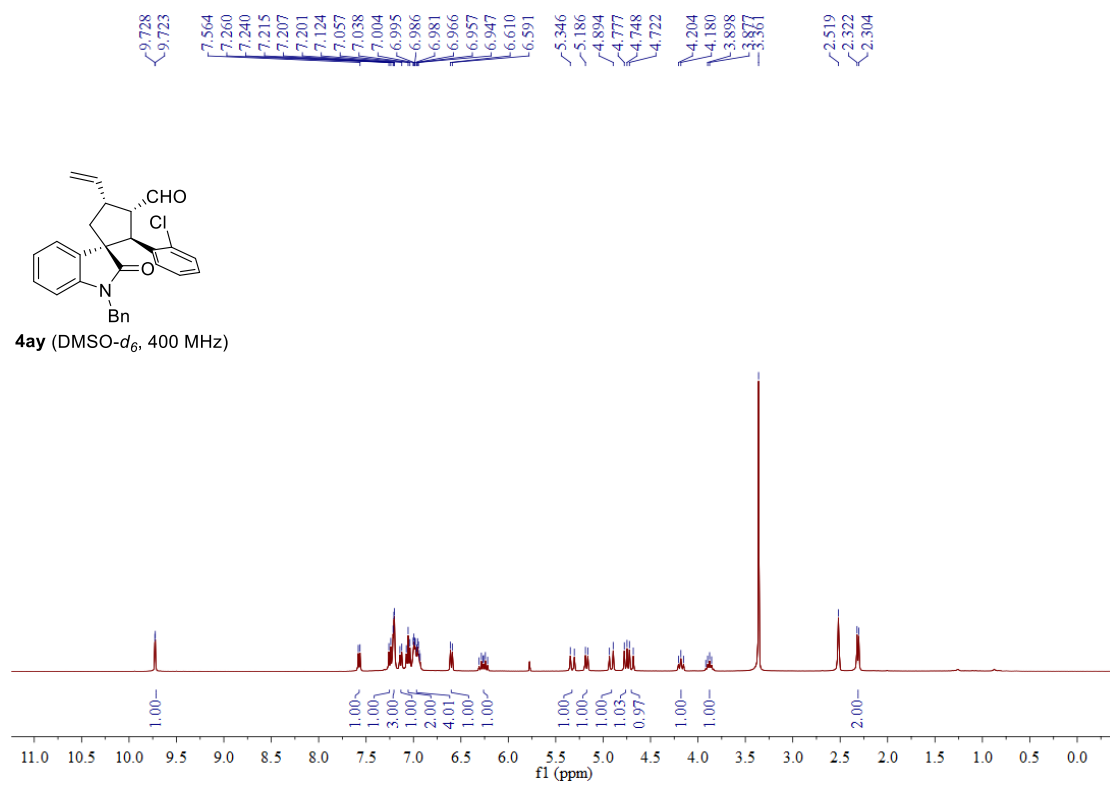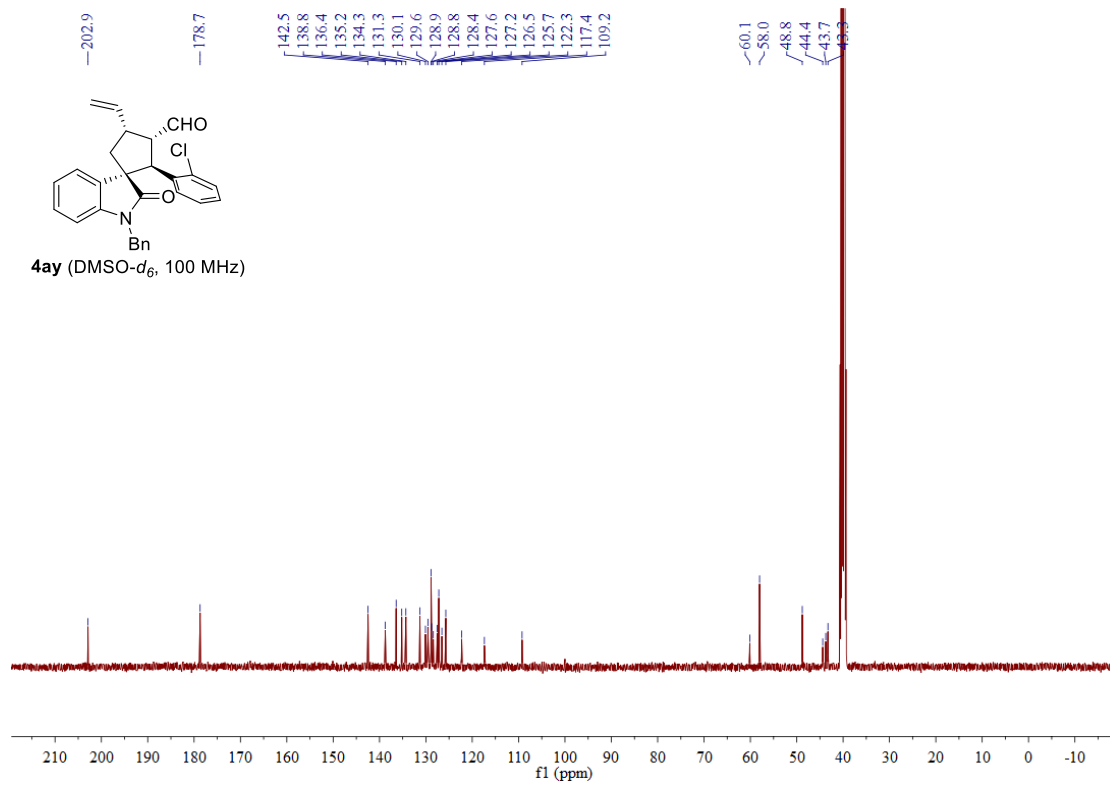

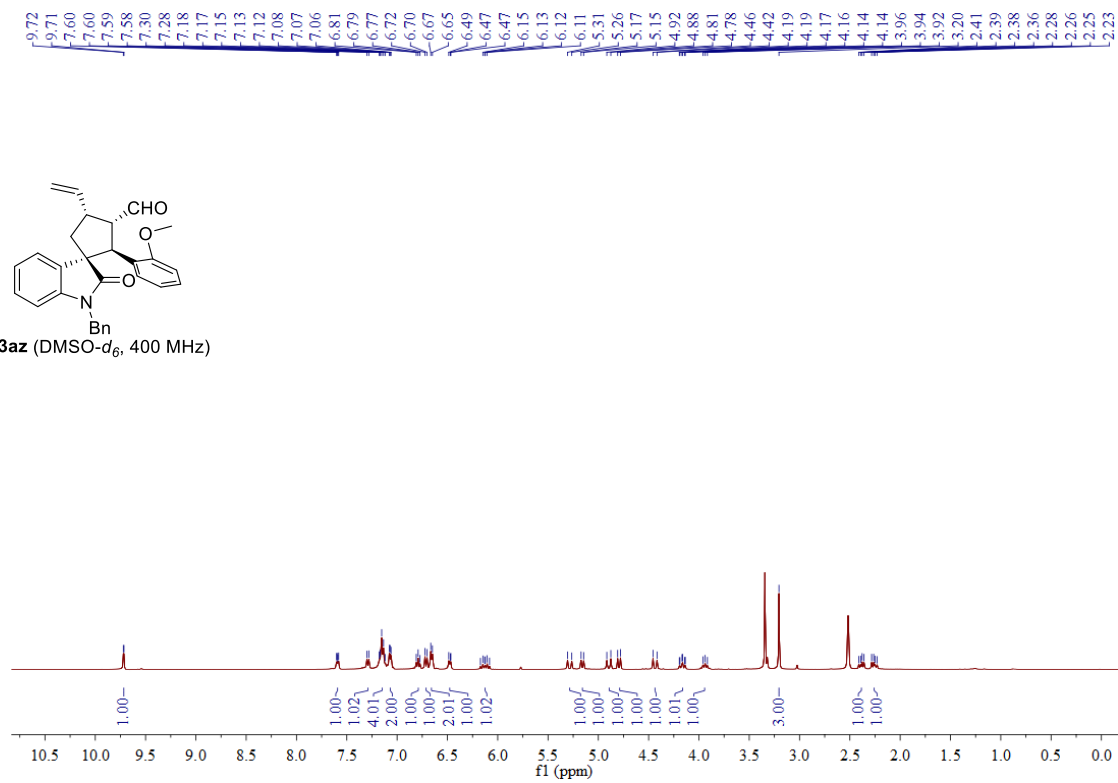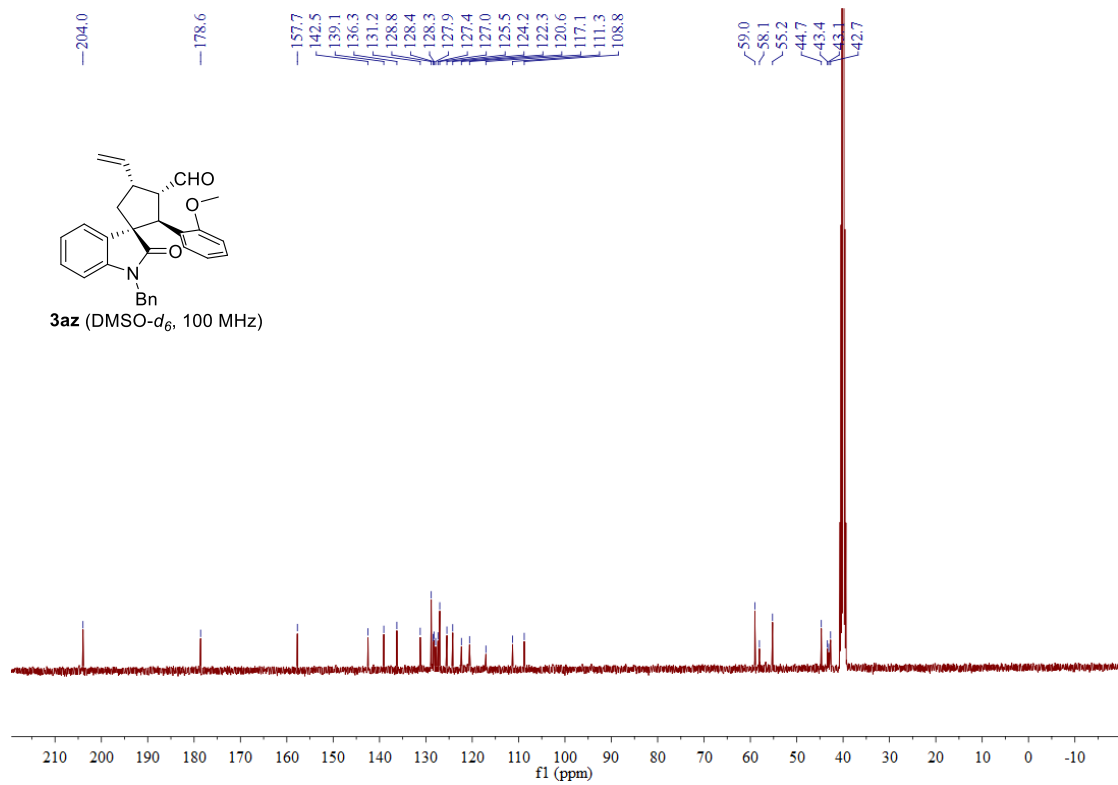

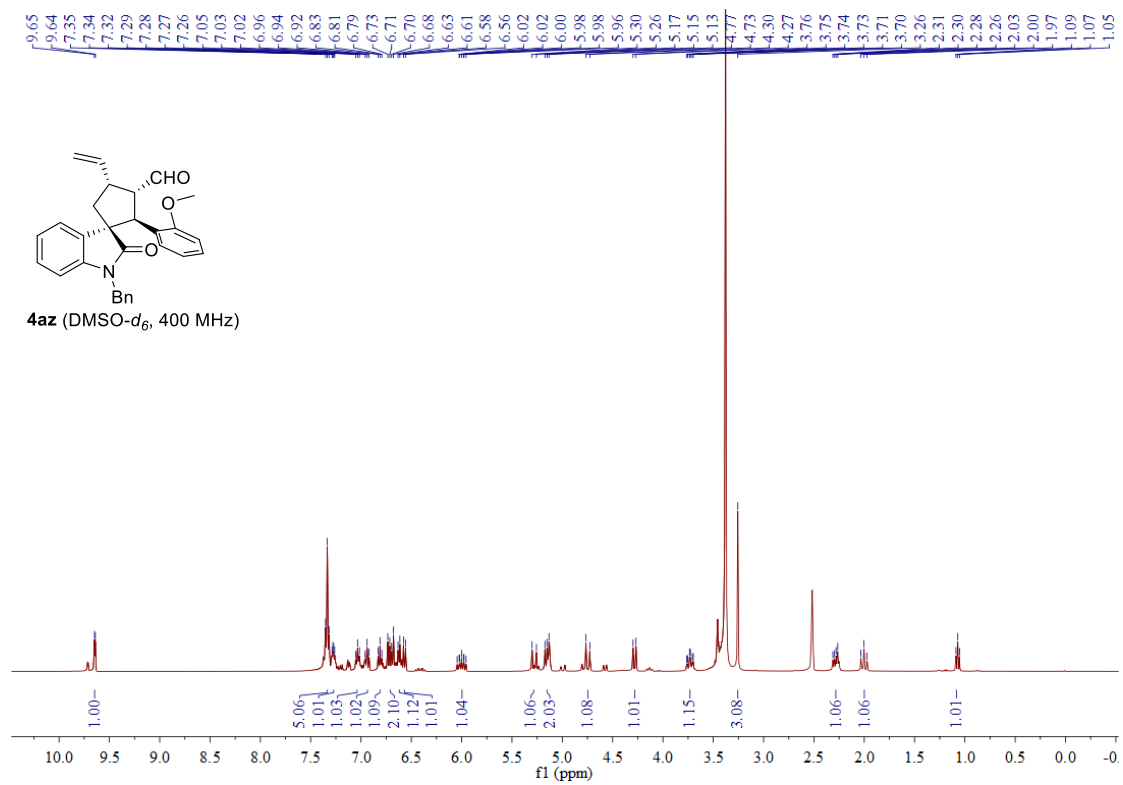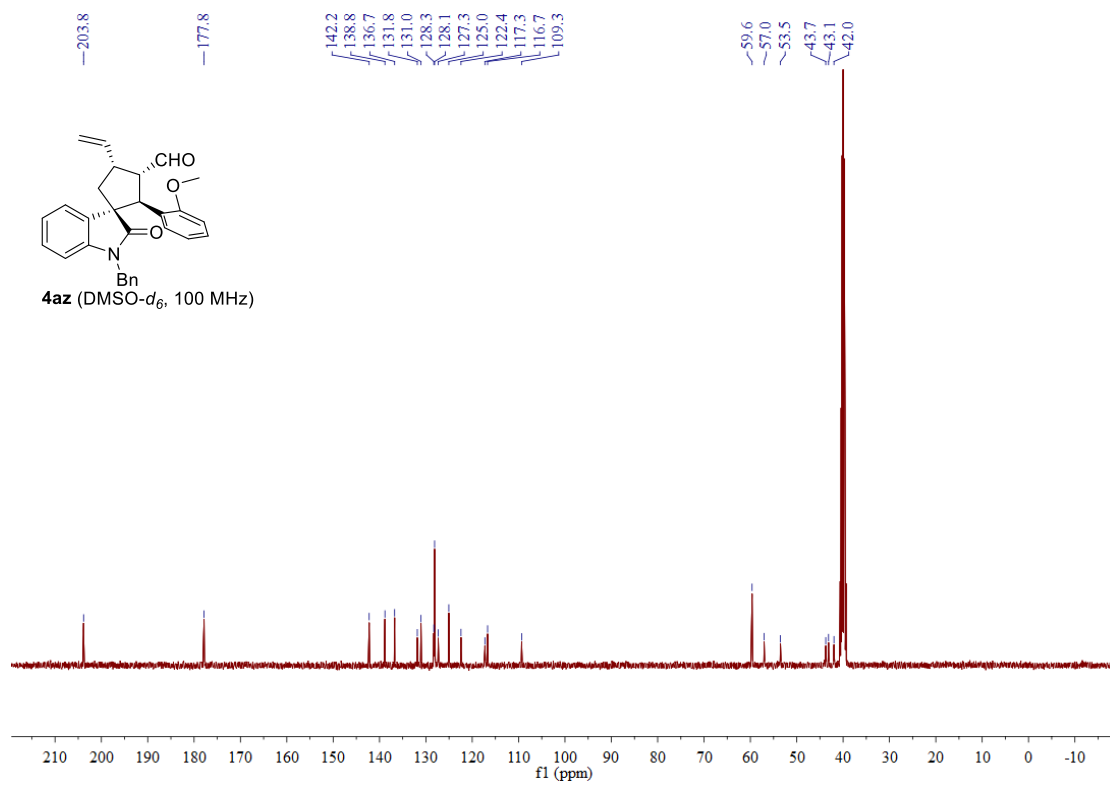

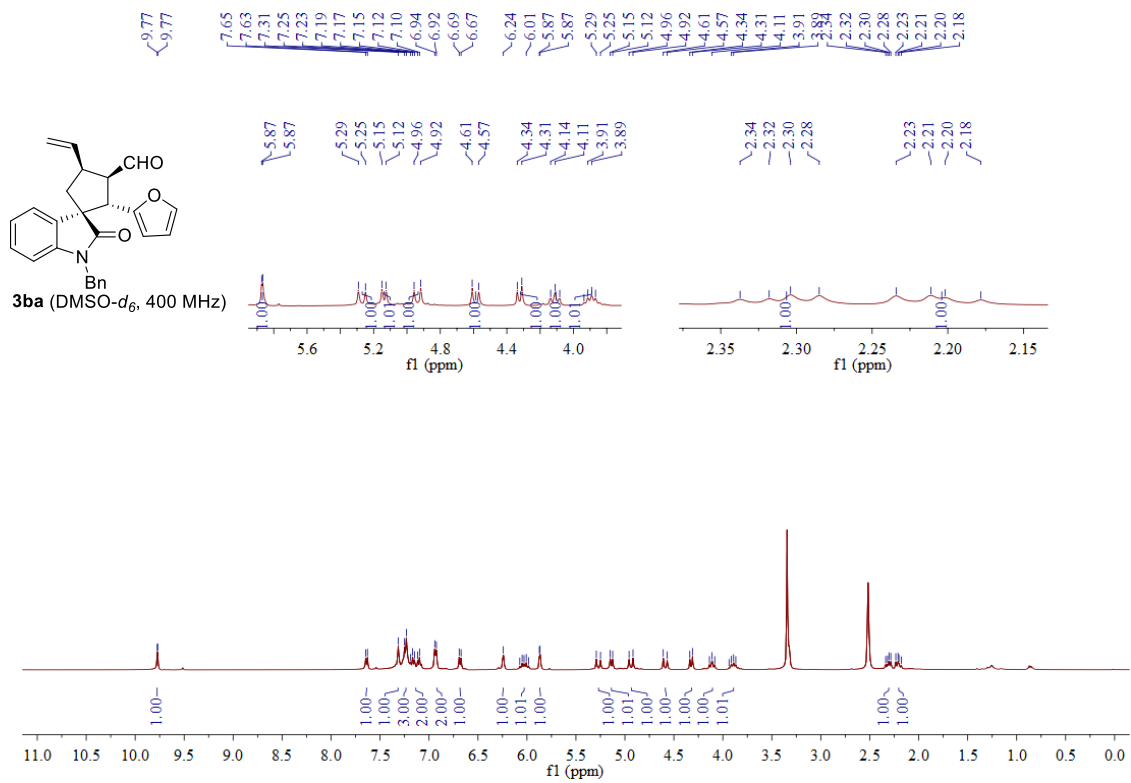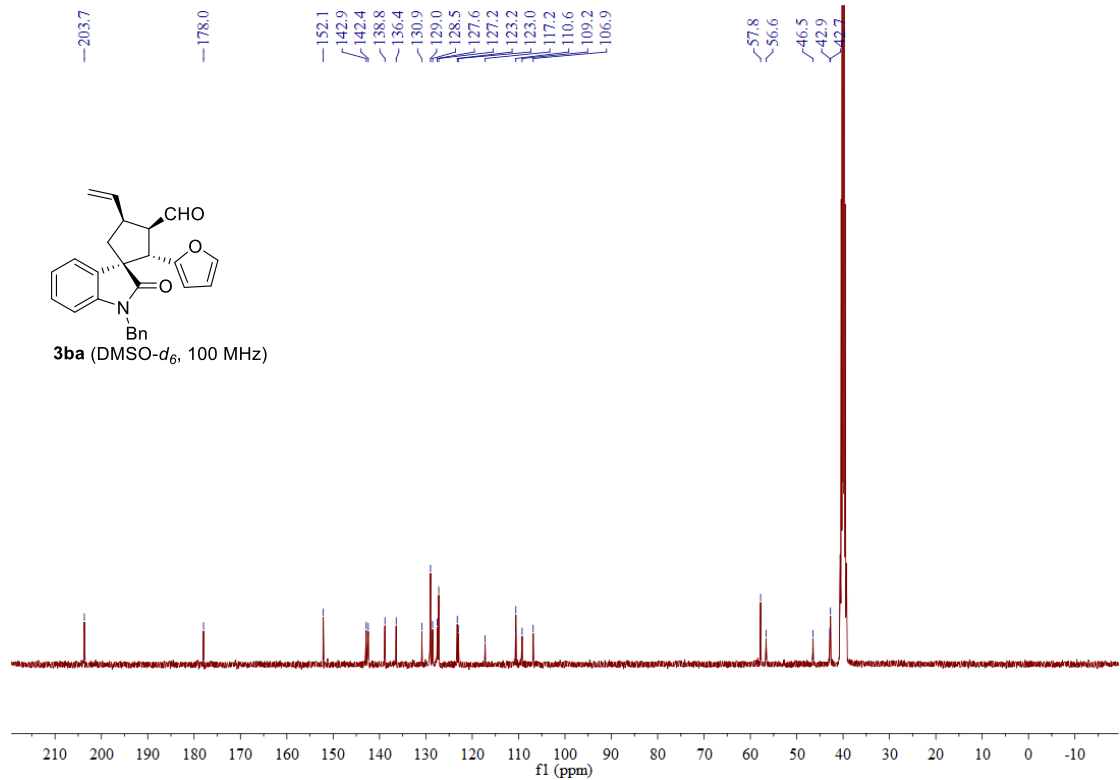

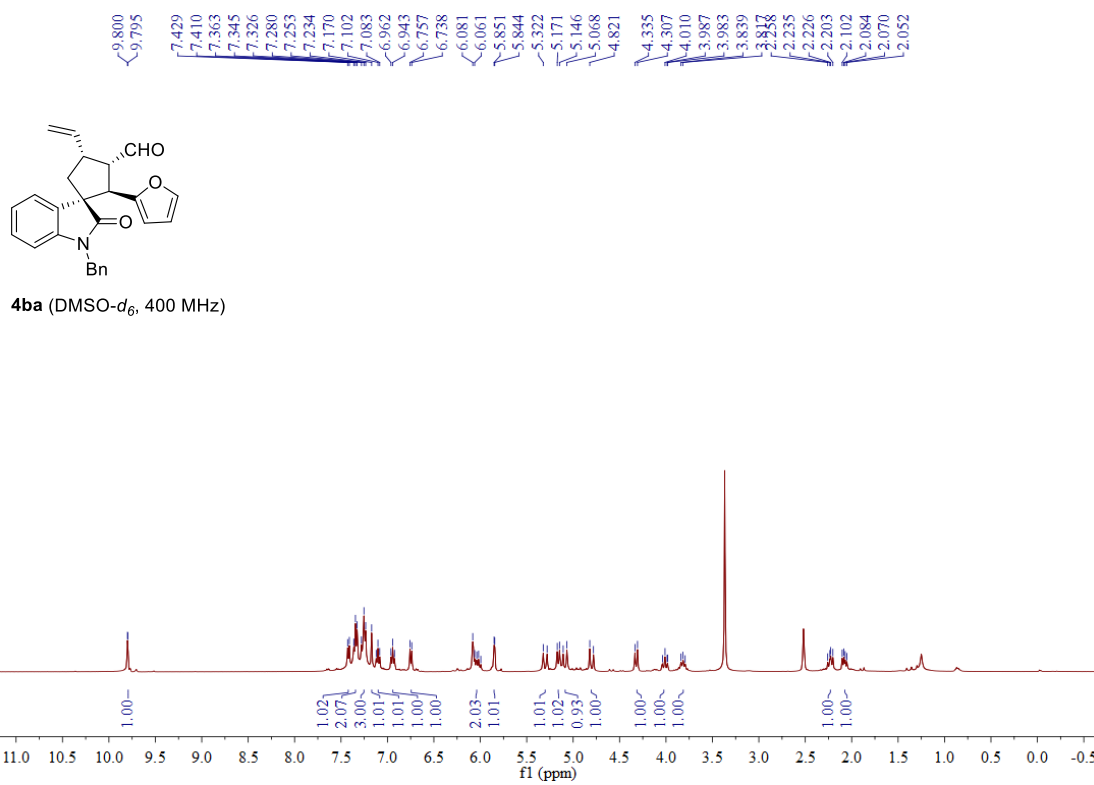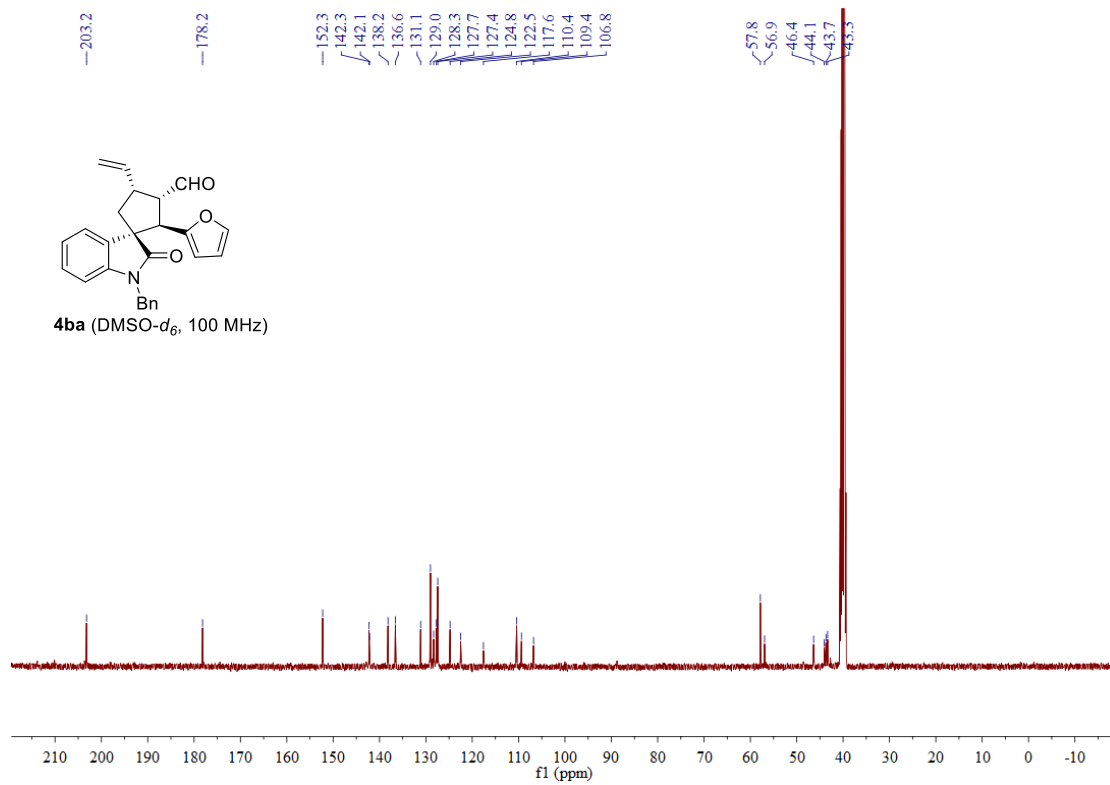



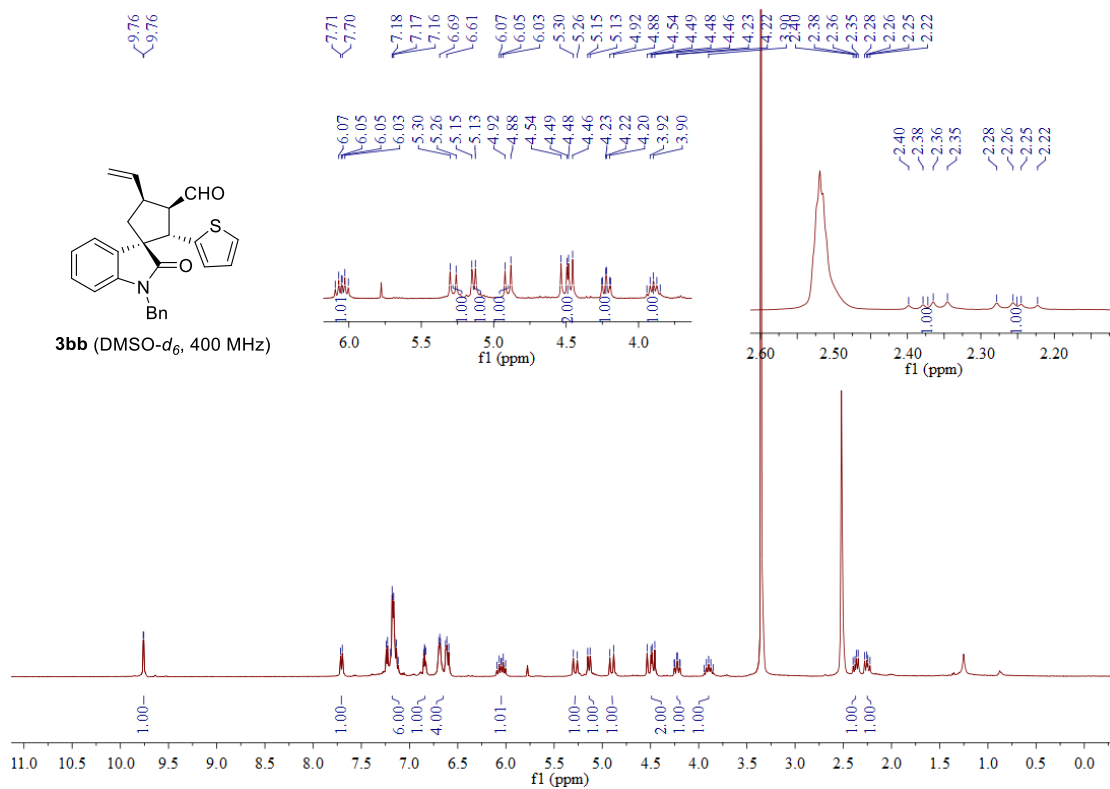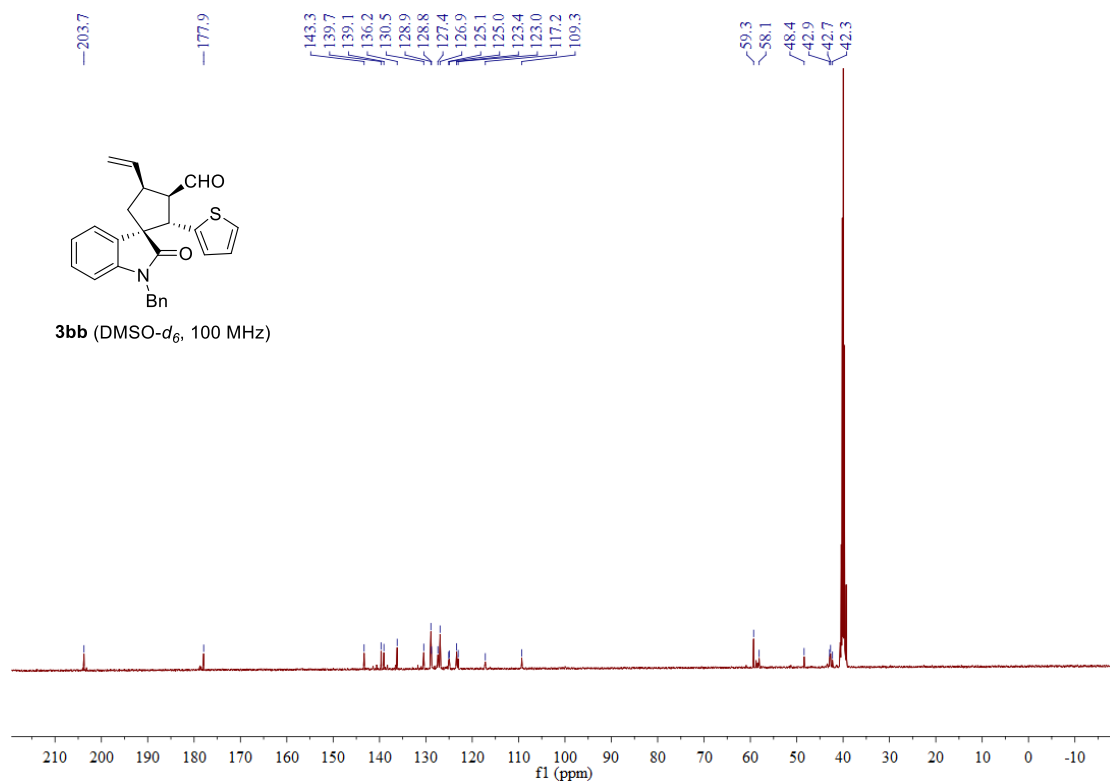

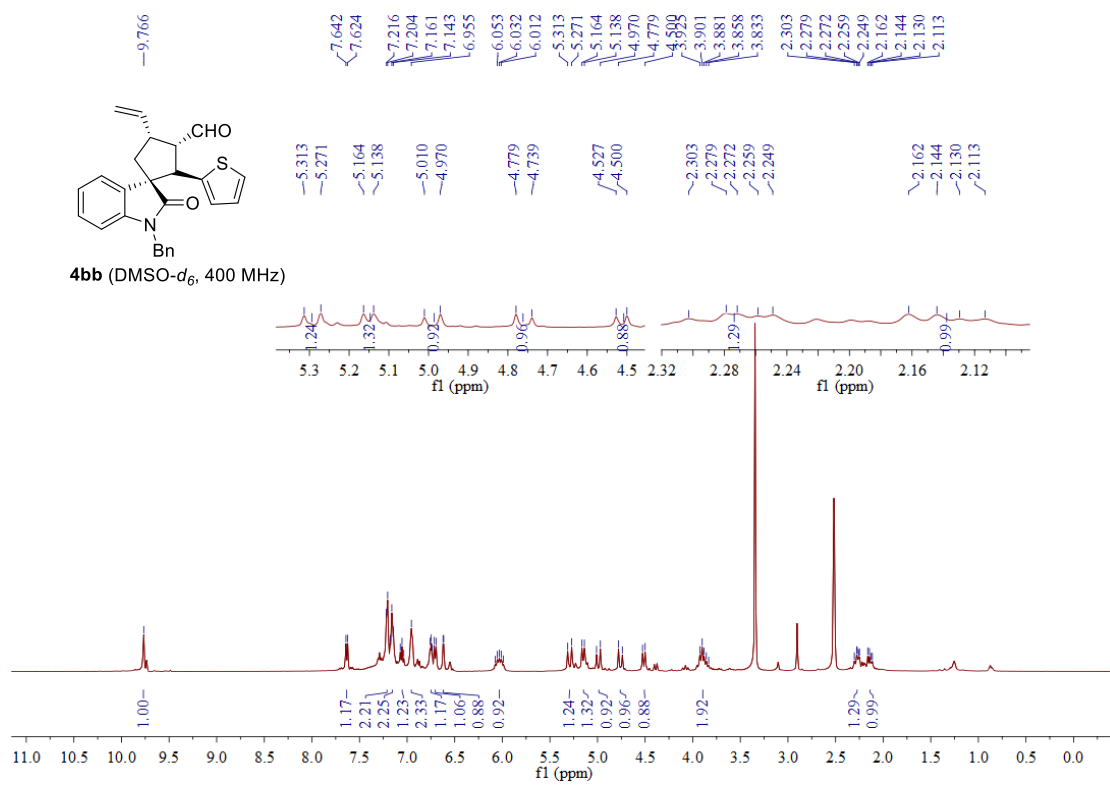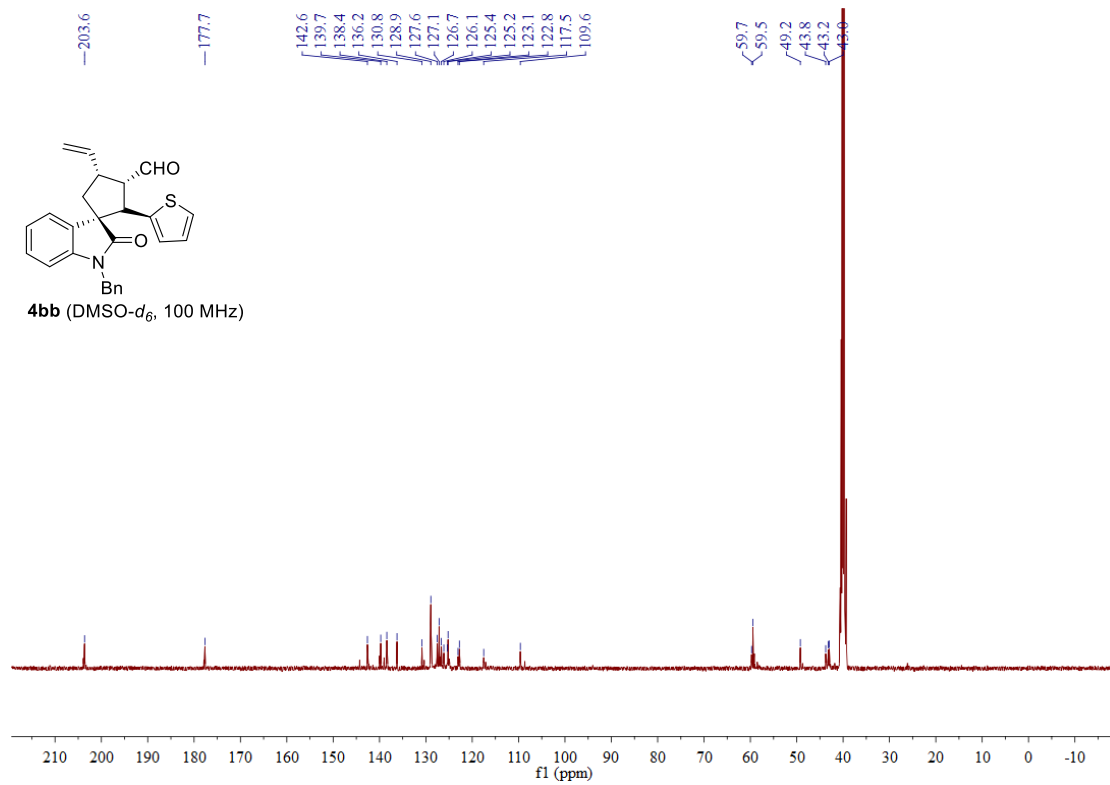

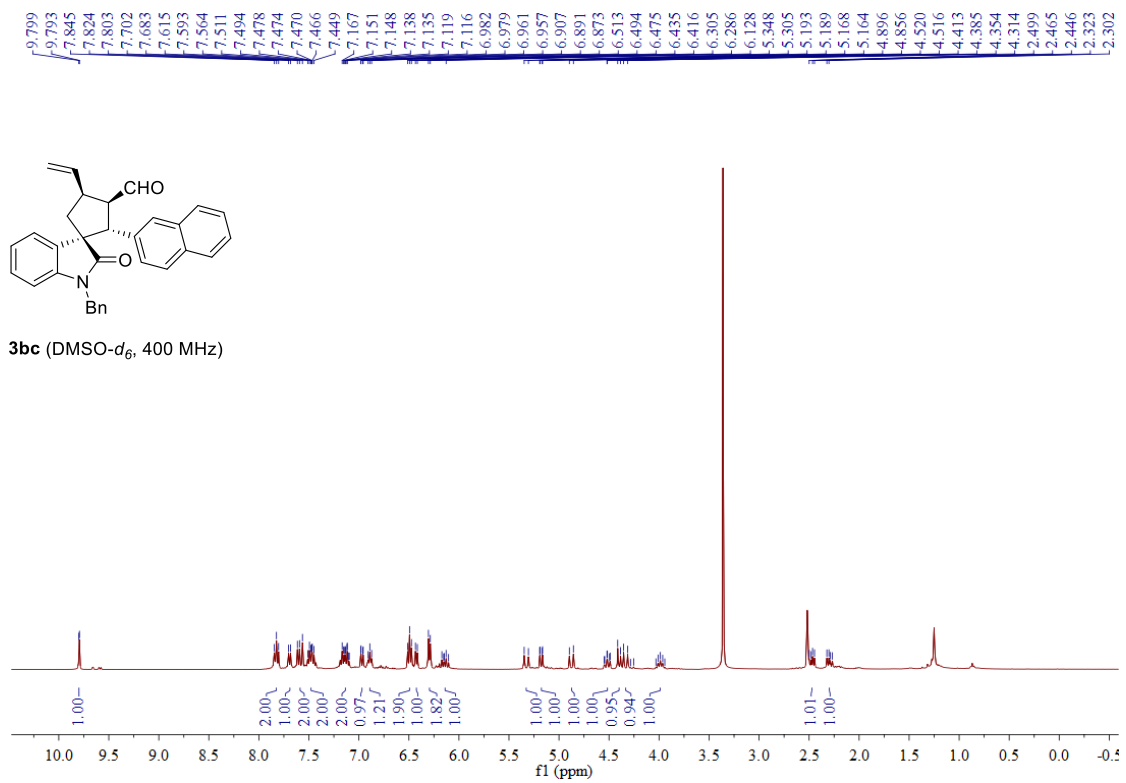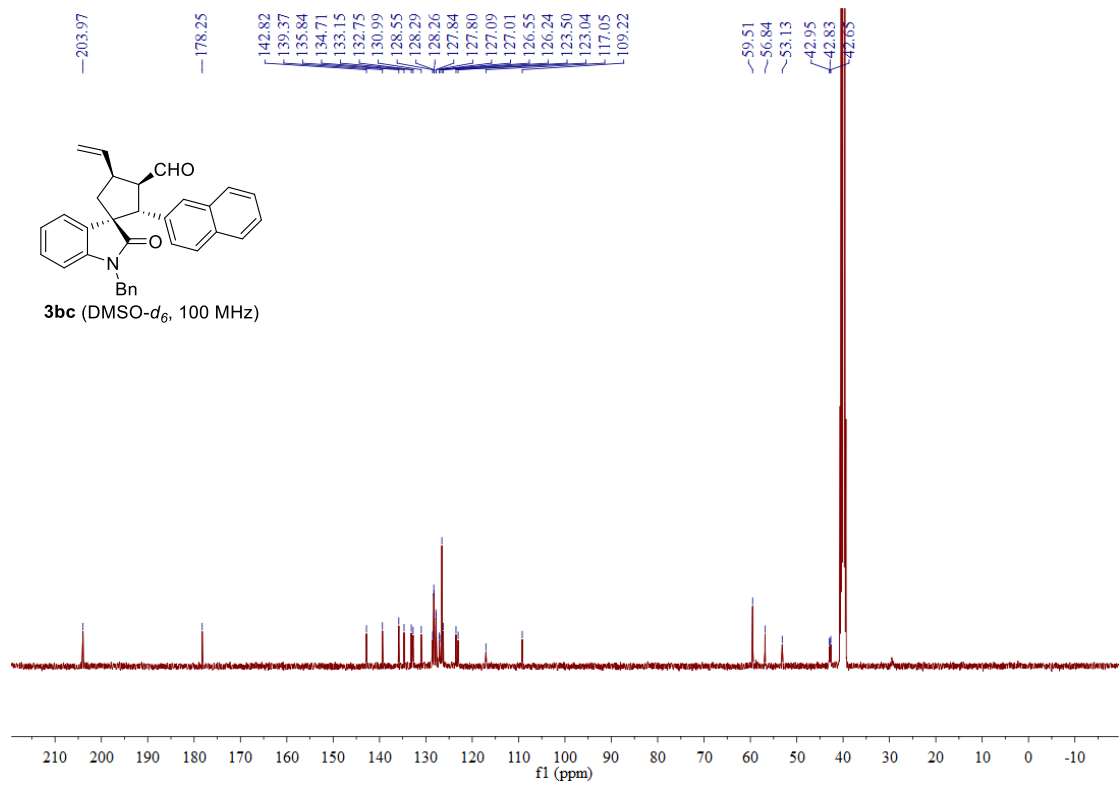

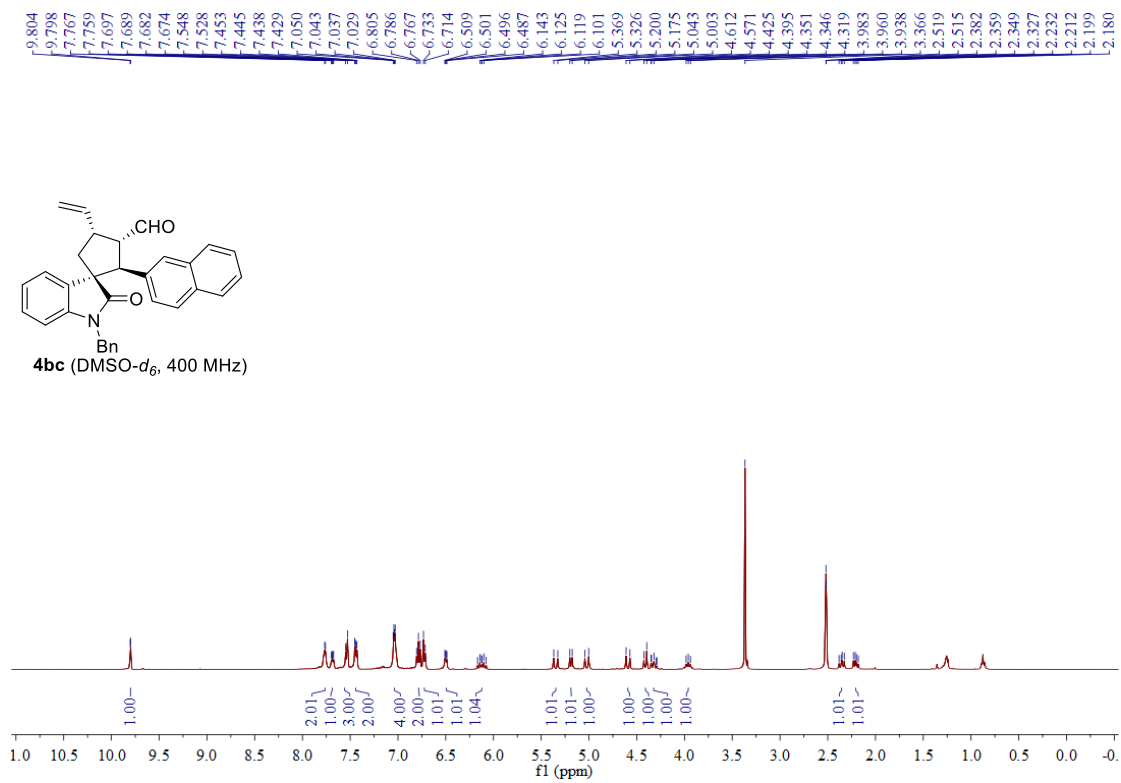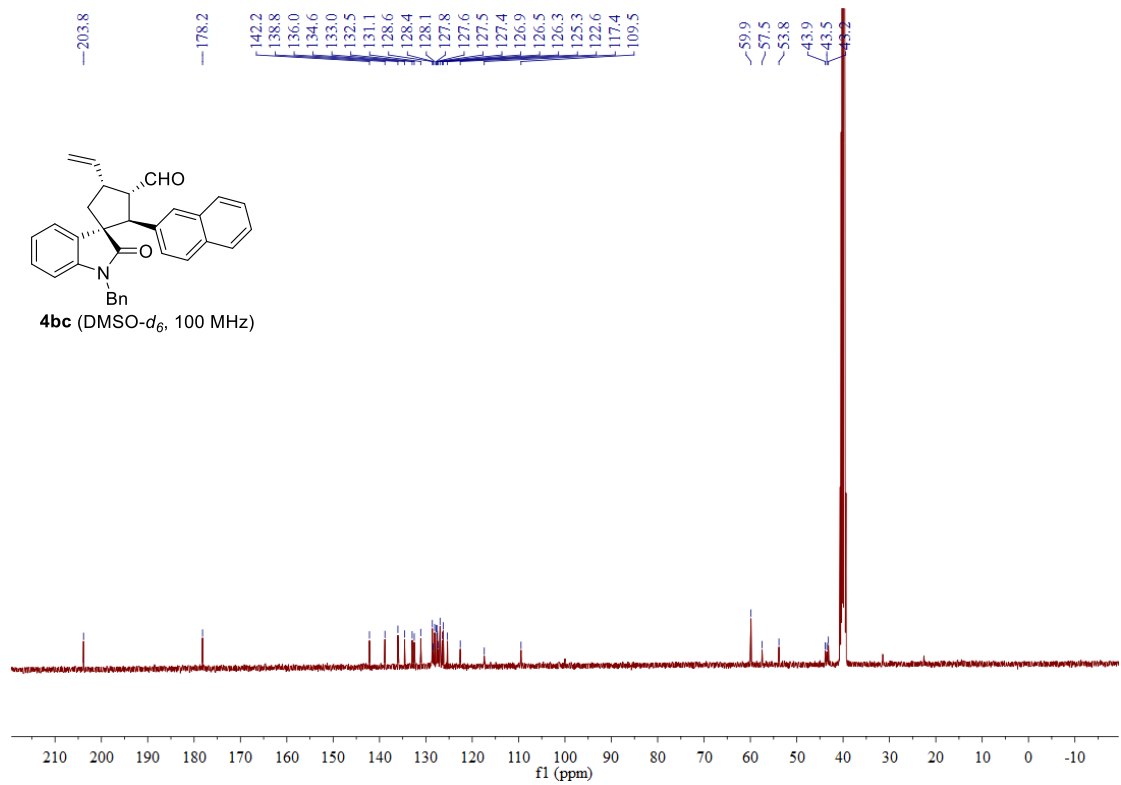

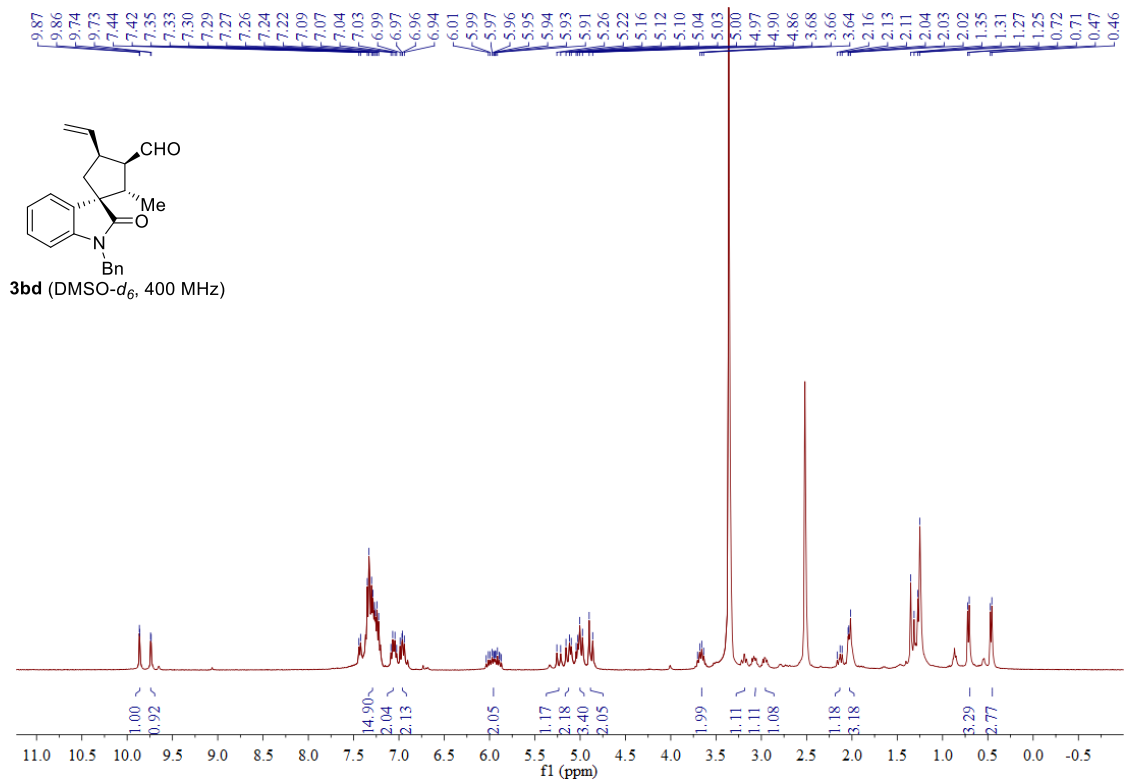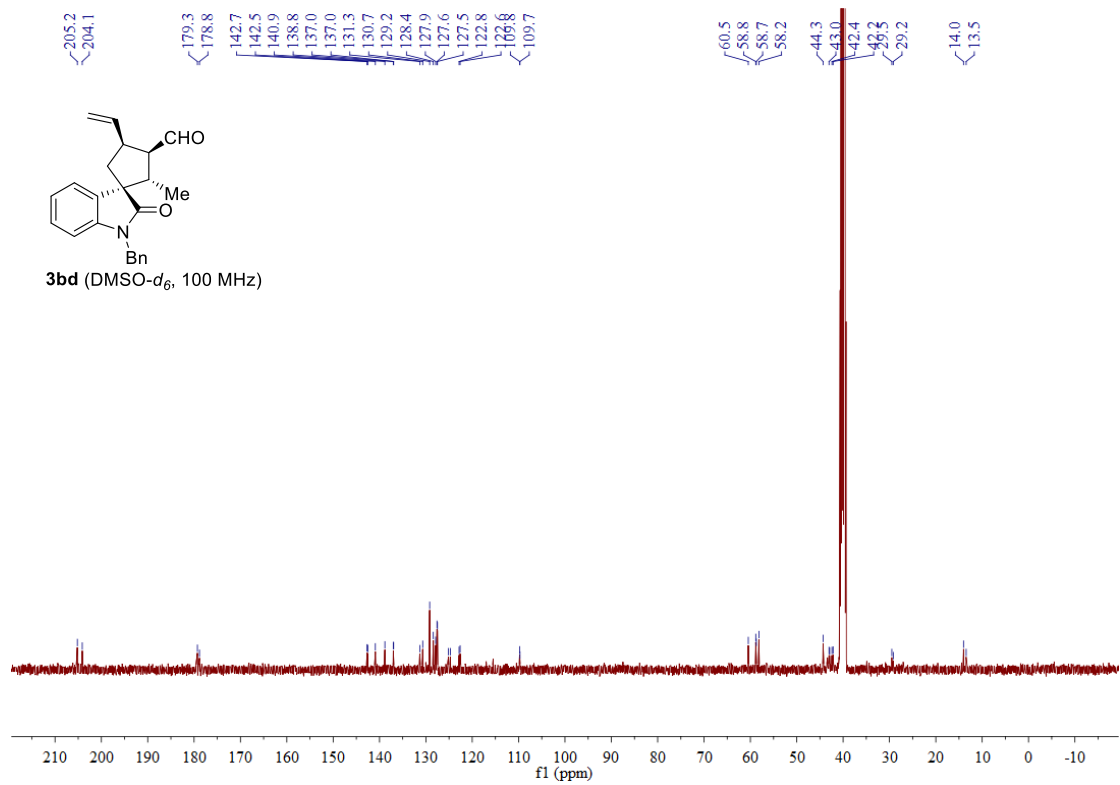

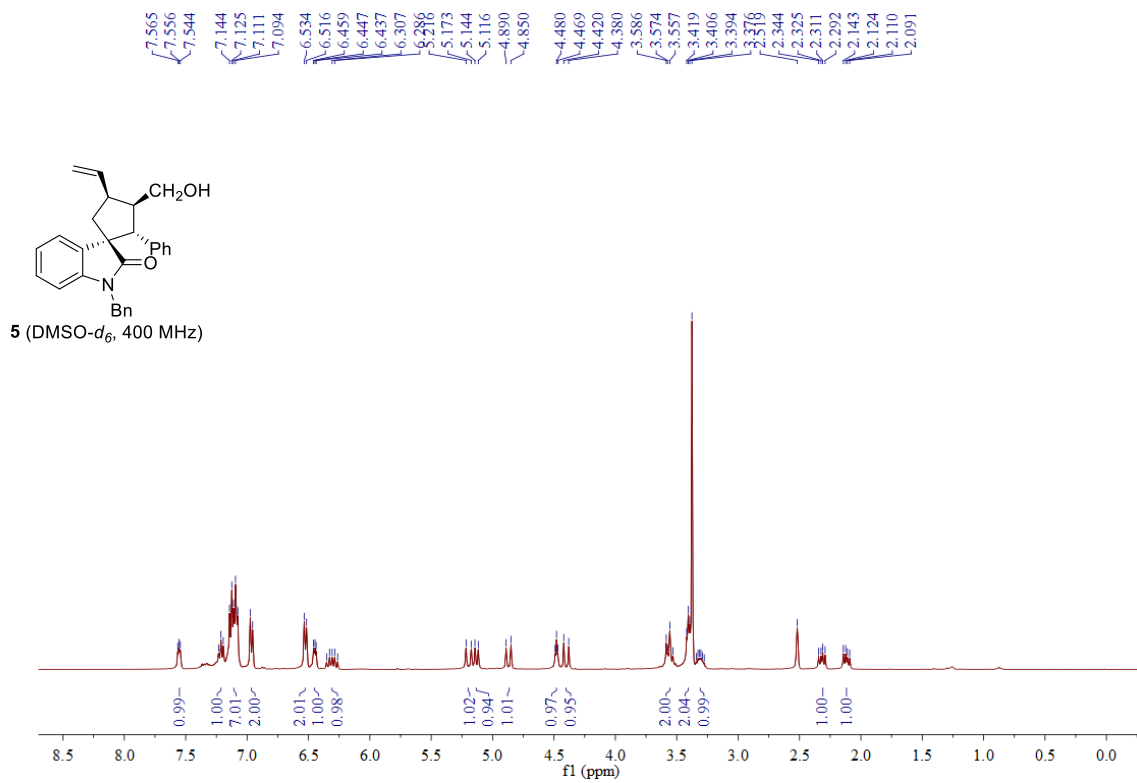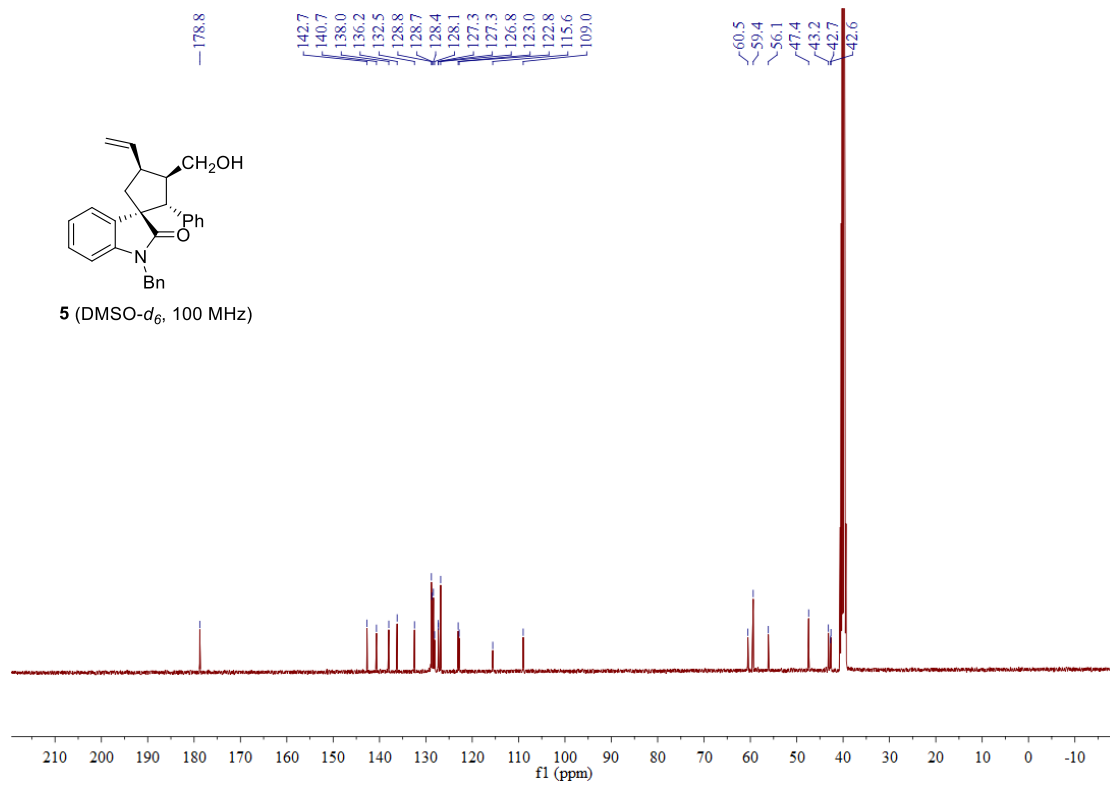

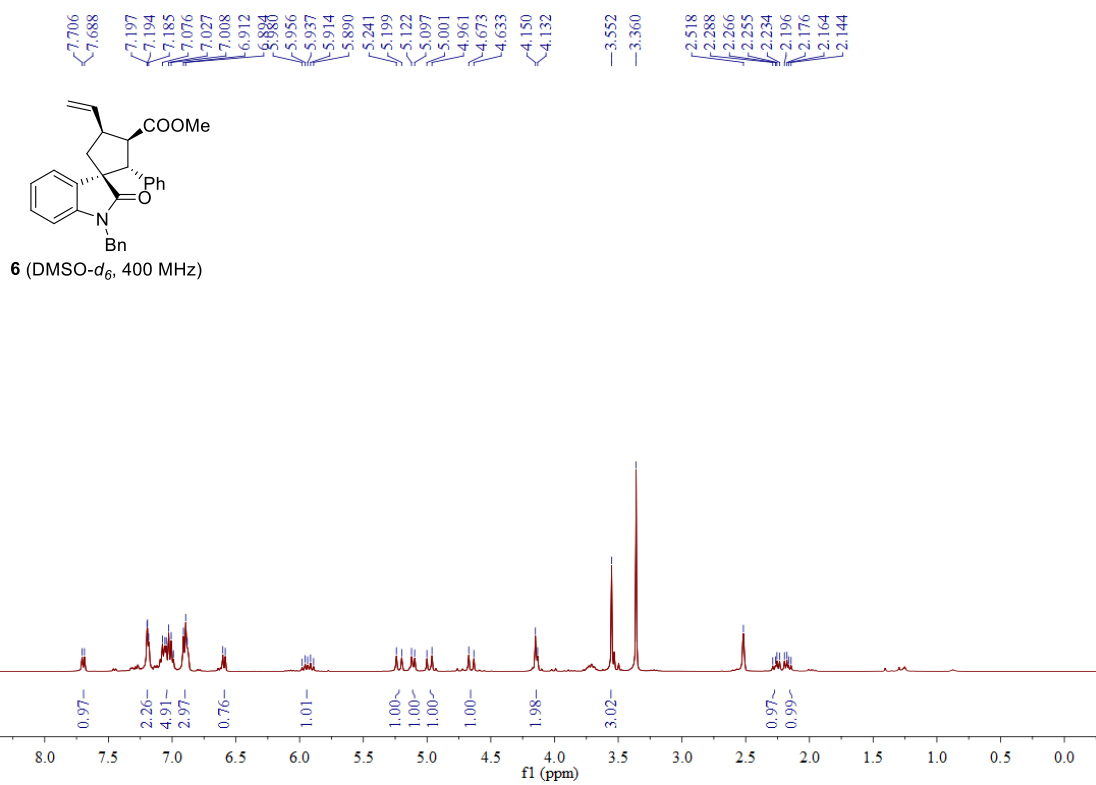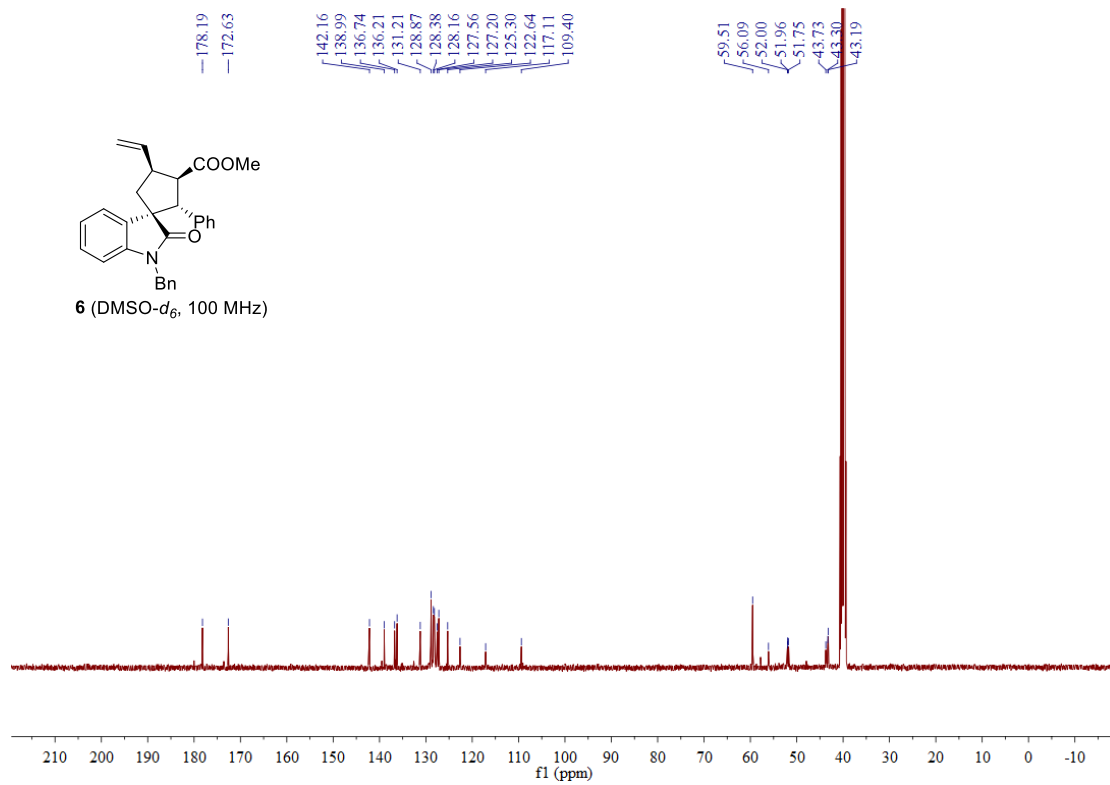

### HPLC spectra of *racemic-3aa*

mAU

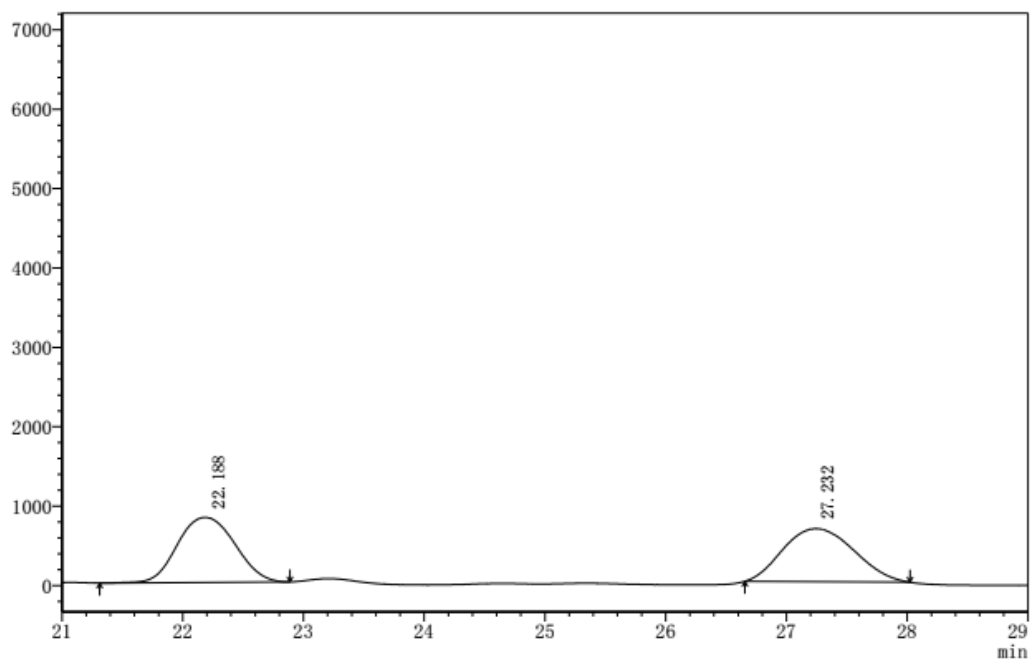

| Peak | RetTime | Area     | Height | Area%  |
|------|---------|----------|--------|--------|
| 1    | 22.188  | 27091039 | 818491 | 49.700 |
| 2    | 27.232  | 27417623 | 669415 | 50.300 |

### HPLC spectra of *enantioenriched-3aa*

mAU

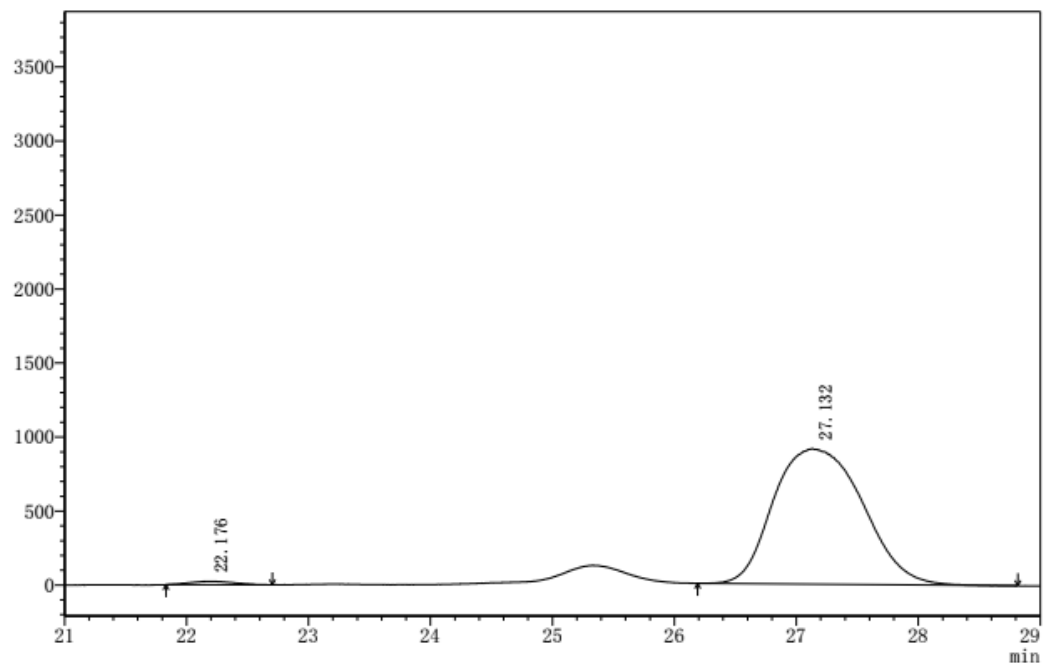

| Peak | RetTime | Area     | Height | Area%  |
|------|---------|----------|--------|--------|
| 1    | 22.176  | 586372   | 22981  | 1.243  |
| 2    | 27.132  | 46587217 | 915116 | 98.757 |



HPLC spectra of *racemic-4aa*

mAU

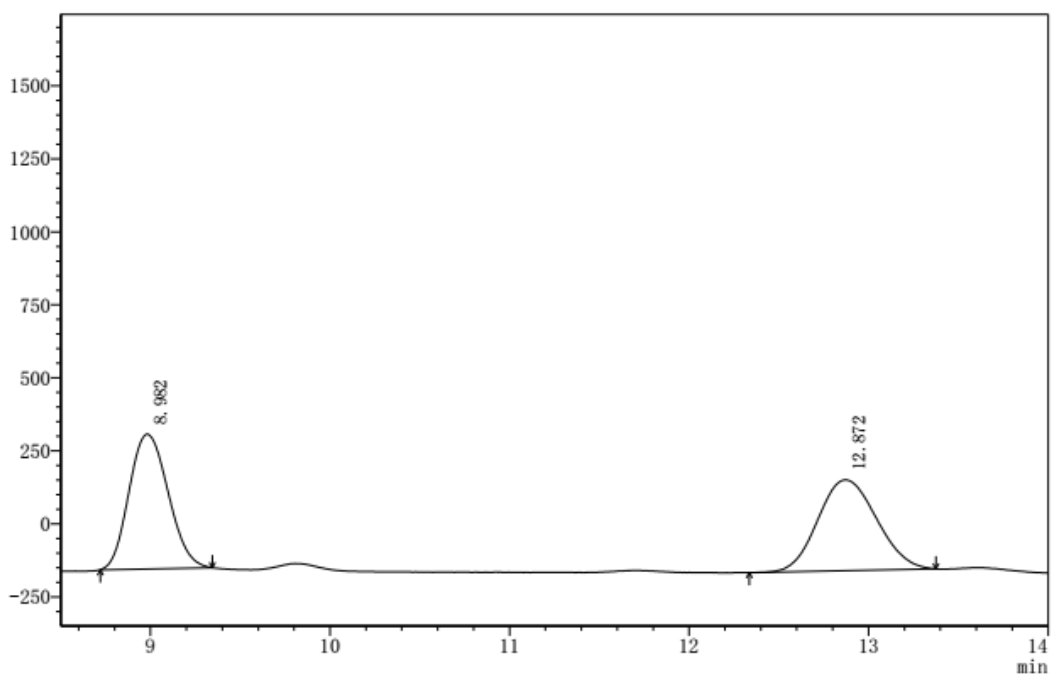

| Peak | RetTime | Area    | Height | Area%  |
|------|---------|---------|--------|--------|
| 1    | 8.982   | 7001479 | 461524 | 49.743 |
| 2    | 12.872  | 7073750 | 310838 | 50.257 |

HPLC spectra of *enantioenriched-4aa*

mAU

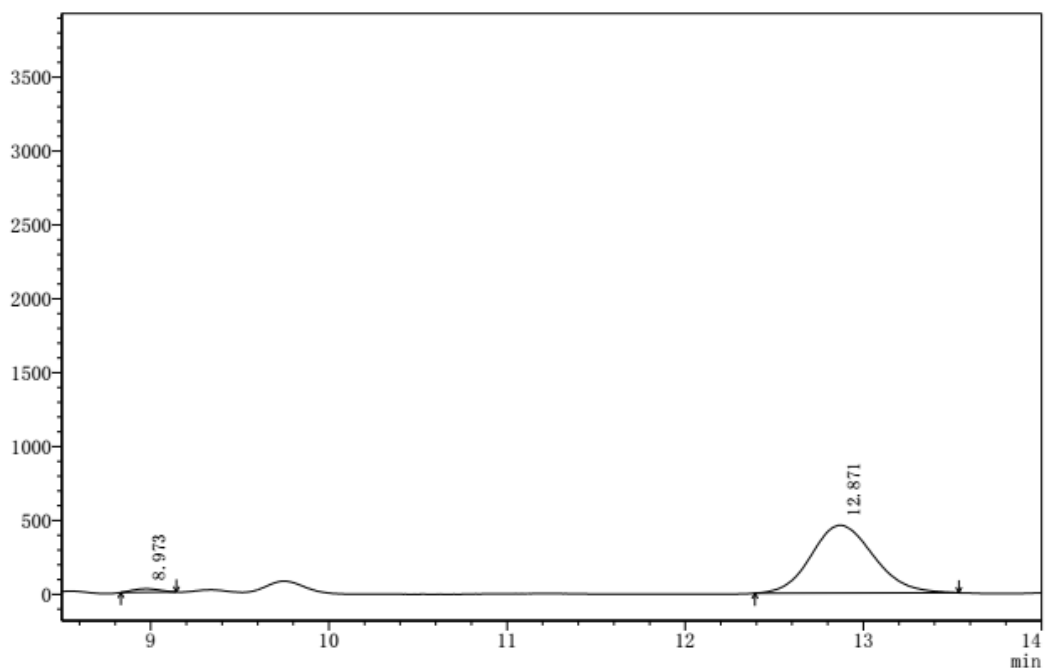

| Peak | RetTime | Area     | Height | Area%  |
|------|---------|----------|--------|--------|
| 1    | 8.973   | 251417   | 24053  | 2.190  |
| 2    | 12.871  | 11229851 | 458528 | 97.810 |

### HPLC spectra of *racemic-3ab*

mAU

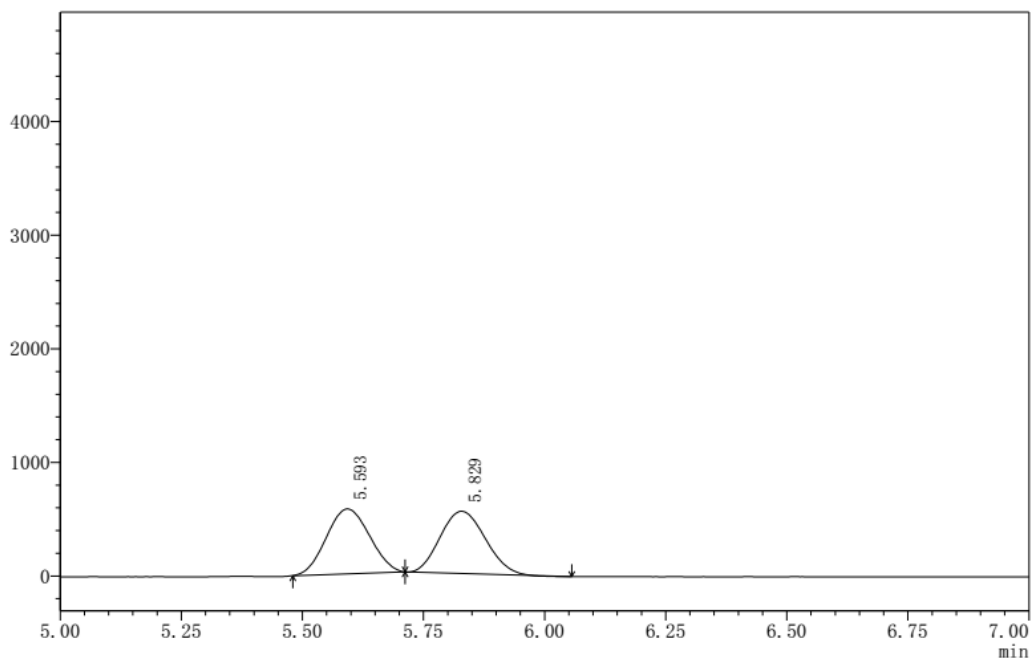

| Peak | RetTime | Area    | Height | Area%  |
|------|---------|---------|--------|--------|
| 1    | 5.593   | 3544074 | 570545 | 50.036 |
| 2    | 5.829   | 3538916 | 547951 | 49.964 |

### HPLC spectra of *enantioenriched-3ab*

mAU

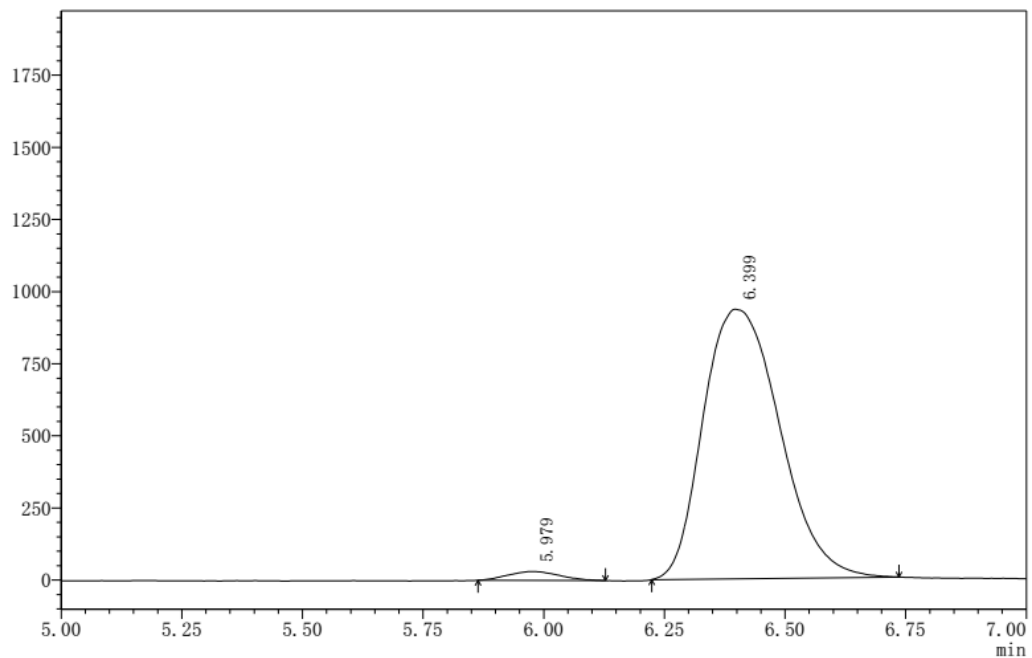

| Peak | RetTime | Area     | Height | Area%  |
|------|---------|----------|--------|--------|
| 1    | 5.979   | 225667   | 30527  | 2.137  |
| 2    | 6.399   | 10334928 | 934231 | 97.863 |

### HPLC spectra of *racemic-4ab*

mAU

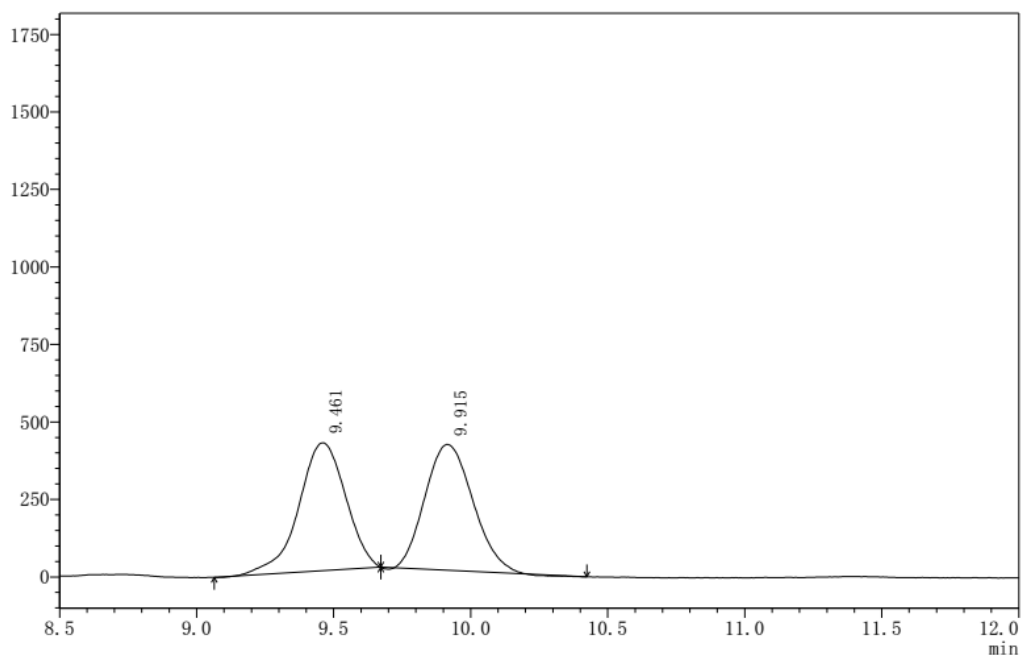

| Peak | RetTime | Area    | Height | Area%  |
|------|---------|---------|--------|--------|
| 1    | 9.461   | 4913228 | 412375 | 49.994 |
| 2    | 9.915   | 4914323 | 405556 | 50.006 |

### HPLC spectra of *enantioenriched-4ab*

mAU

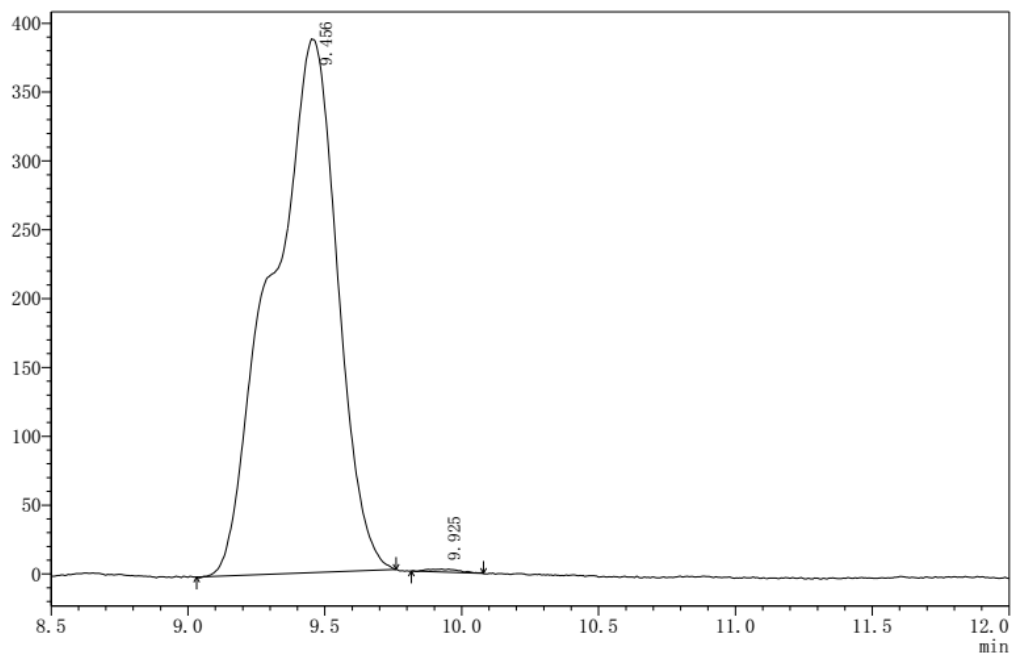

| Peak | RetTime | Area    | Height | Area%  |
|------|---------|---------|--------|--------|
| 1    | 9.456   | 6447316 | 387514 | 99.743 |
| 2    | 9.925   | 16609   | 2079   | 0.257  |

### HPLC spectra of *racemic-3ac*

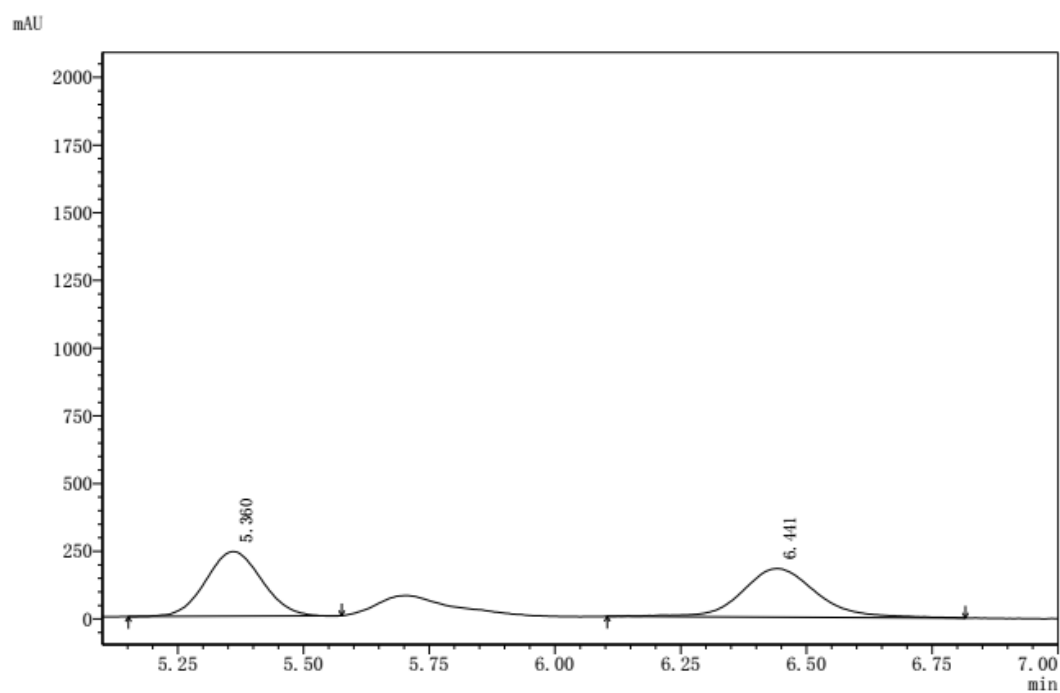

| Peak | RetTime | Area    | Height | Area%  |
|------|---------|---------|--------|--------|
| 1    | 5.360   | 1838917 | 238079 | 49.869 |
| 2    | 6.441   | 1848562 | 179064 | 50.131 |

### HPLC spectra of *enantioenriched-3ac*

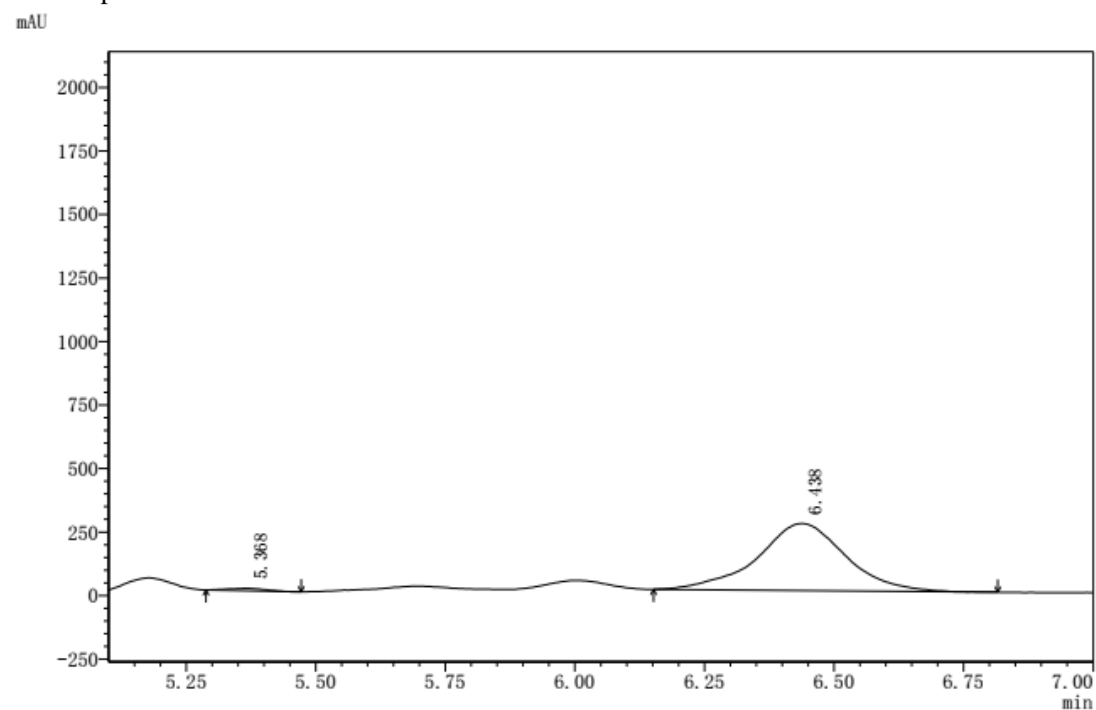

| Peak | RetTime | Area    | Height | Area%  |
|------|---------|---------|--------|--------|
| 1    | 5.368   | 47171   | 9705   | 1.487  |
| 2    | 6.438   | 3124336 | 264283 | 98.513 |

HPLC spectra of *racemic-4ac*

mAU

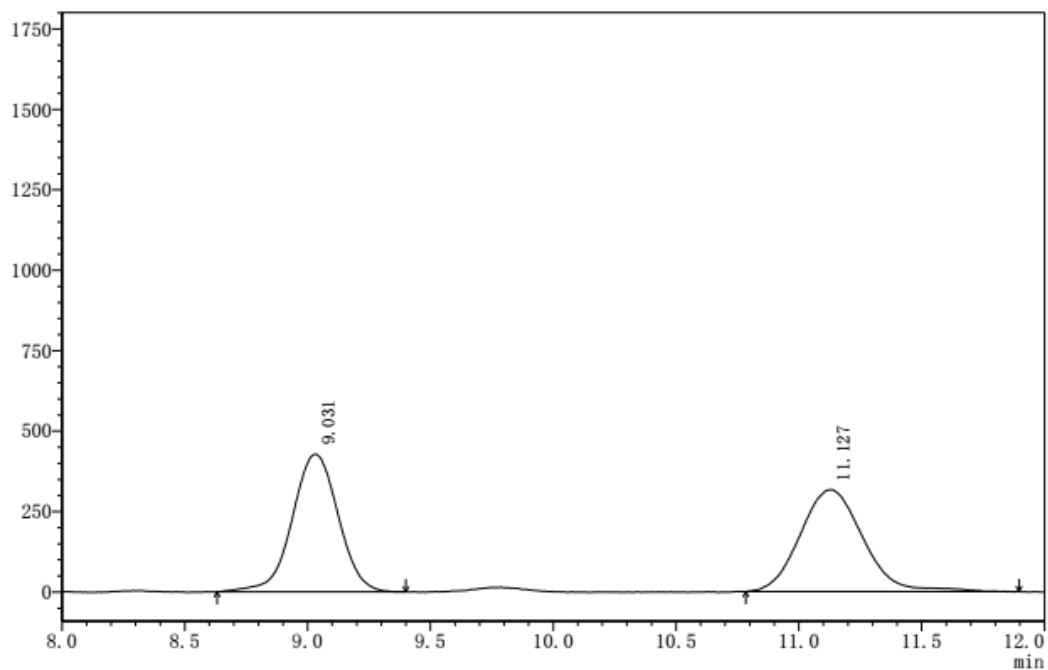

| Peak | RetTime | Area    | Height | Area%  |
|------|---------|---------|--------|--------|
| 1    | 9.031   | 5579644 | 427502 | 49.791 |
| 2    | 11.127  | 5626483 | 316263 | 50.209 |

HPLC spectra of *enantioenriched-4ac*

mAU

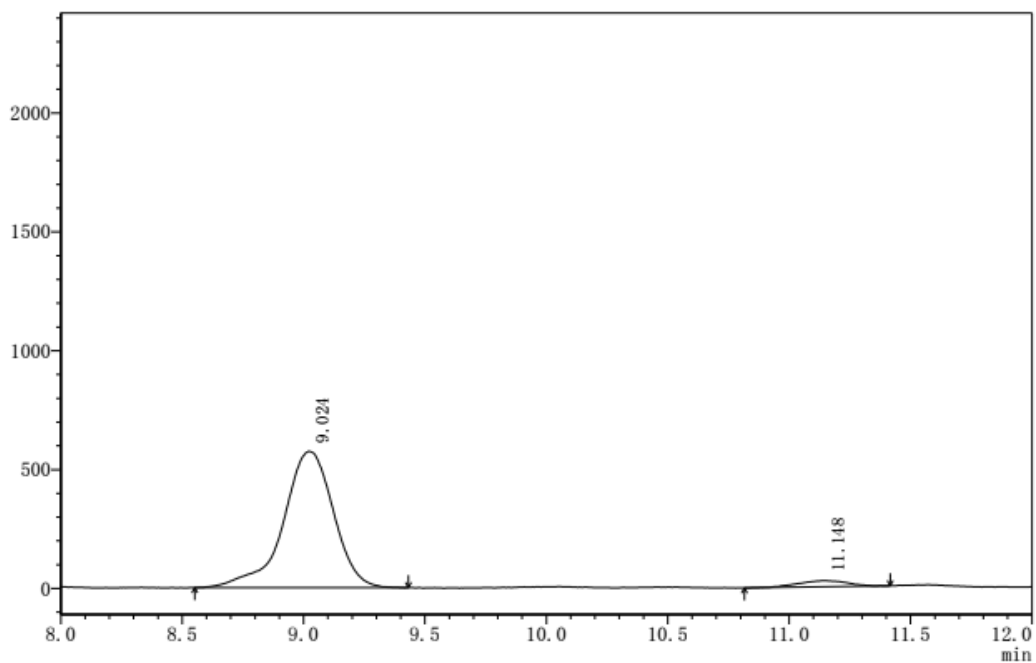

| Peak | RetTime | Area    | Height | Area%  |
|------|---------|---------|--------|--------|
| 1    | 9.024   | 8251998 | 572731 | 95.829 |
| 2    | 11.148  | 359134  | 25416  | 4.171  |

### HPLC spectra of *racemic-3ad*

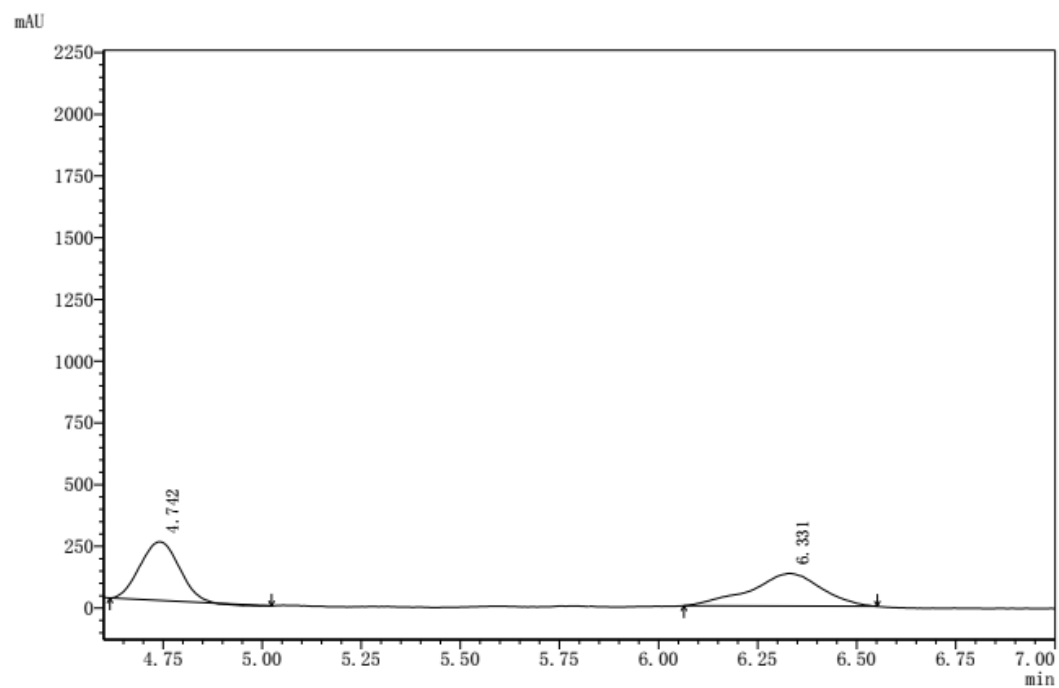

| Peak | RetTime | Area    | Height | Area%  |
|------|---------|---------|--------|--------|
| 1    | 4.742   | 1619037 | 237427 | 49.731 |
| 2    | 6.331   | 1636528 | 131840 | 50.269 |

### HPLC spectra of *enantioenriched-3ad*

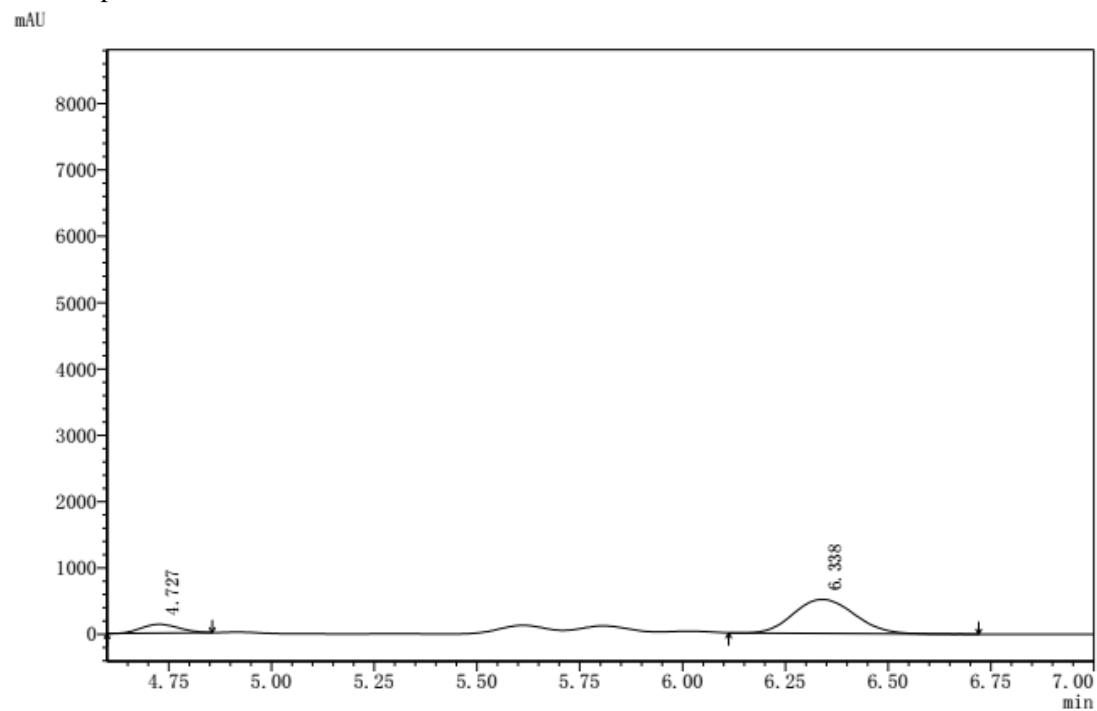

| Peak | RetTime | Area    | Height | Area%  |
|------|---------|---------|--------|--------|
| 1    | 4.727   | 833300  | 131390 | 13.722 |
| 2    | 6.338   | 5239259 | 507998 | 86.278 |

HPLC spectra of *racemic-4ad*

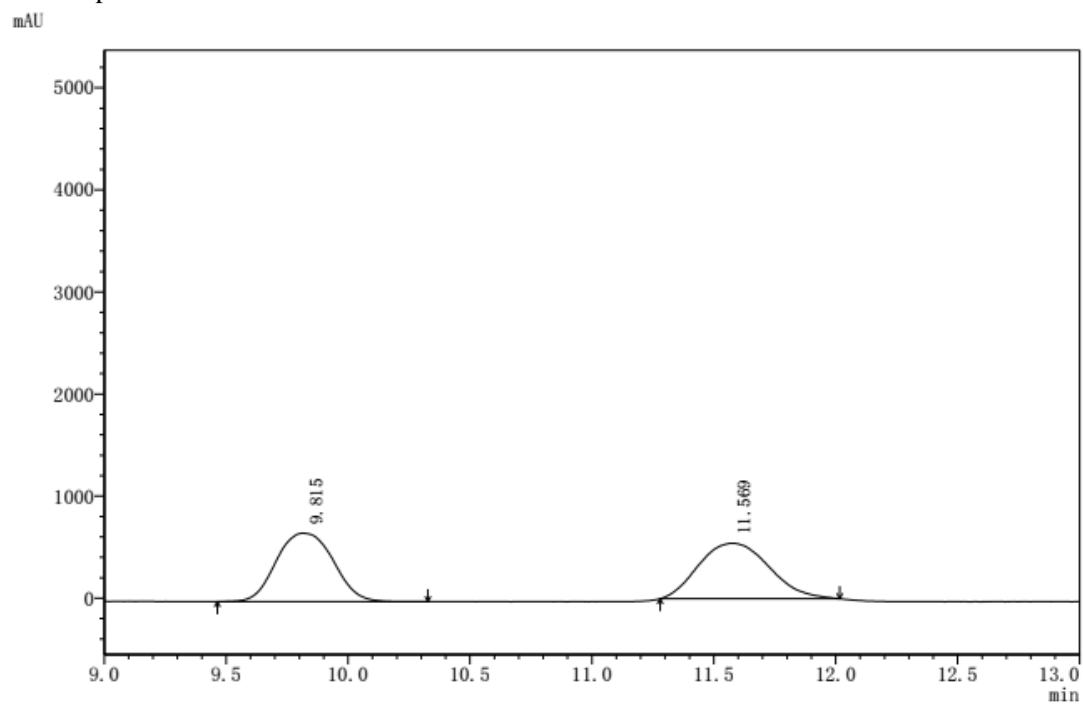

| Peak | RetTime | Area     | Height | Area%  |
|------|---------|----------|--------|--------|
| 1    | 9.815   | 10868090 | 670311 | 49.826 |
| 2    | 11.569  | 10944051 | 543102 | 50.174 |

HPLC spectra of *enantioenriched-4ad*

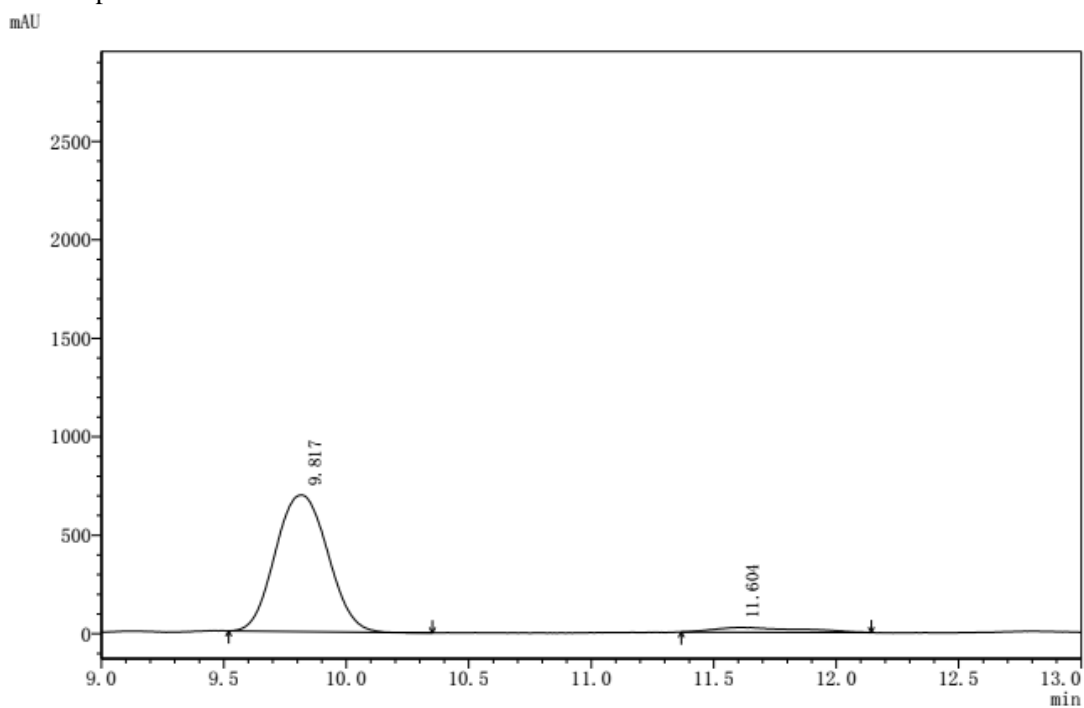

| Peak | RetTime | Area     | Height | Area%  |
|------|---------|----------|--------|--------|
| 1    | 9.817   | 10333743 | 692694 | 94.567 |
| 2    | 11.604  | 593681   | 23910  | 5.433  |

HPLC spectra of *racemic-3ae*

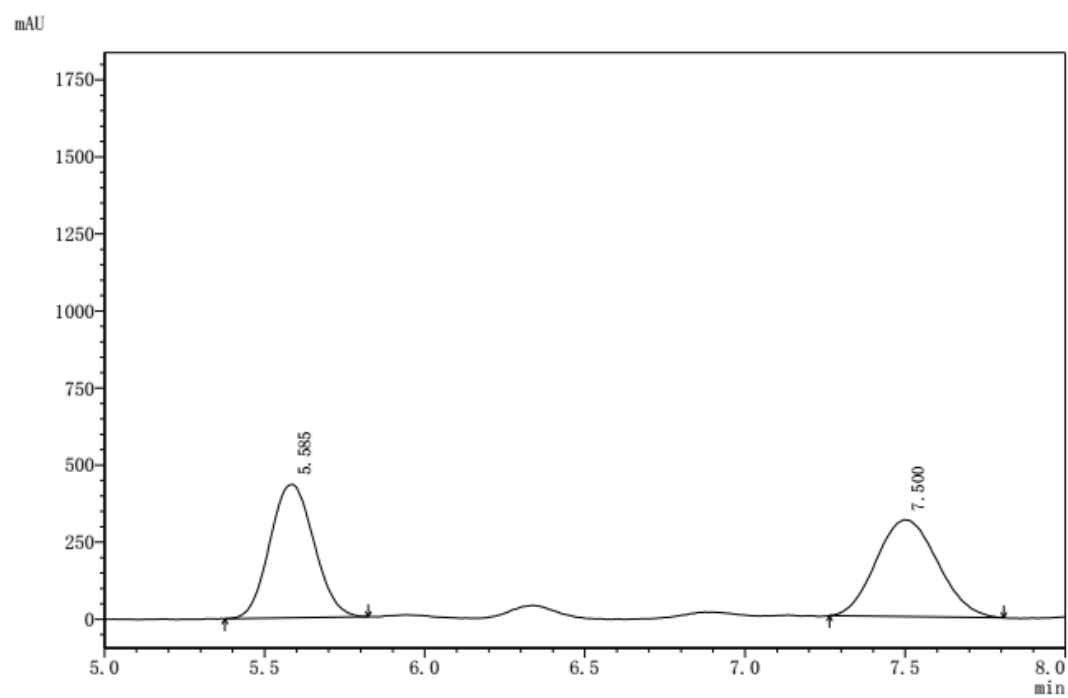

| Peak | RetTime | Area    | Height | Area%  |
|------|---------|---------|--------|--------|
| 1    | 5.585   | 4150119 | 431972 | 49.732 |
| 2    | 7.500   | 4194833 | 313533 | 50.268 |

HPLC spectra of *enantioenriched-3ae*

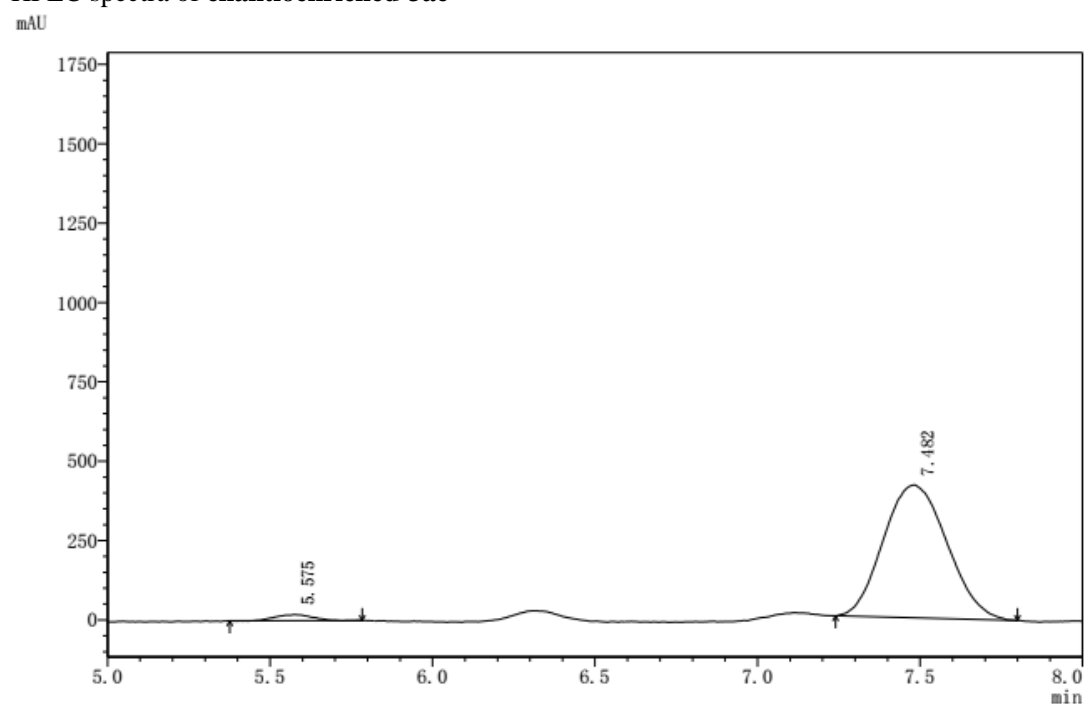

| Peak | RetTime | Area     | Height | Area%  |
|------|---------|----------|--------|--------|
| 1    | 5.575   | 417611   | 51195  | 3.632  |
| 2    | 7.456   | 11079941 | 698765 | 96.368 |



### HPLC spectra of *racemic-4ae*

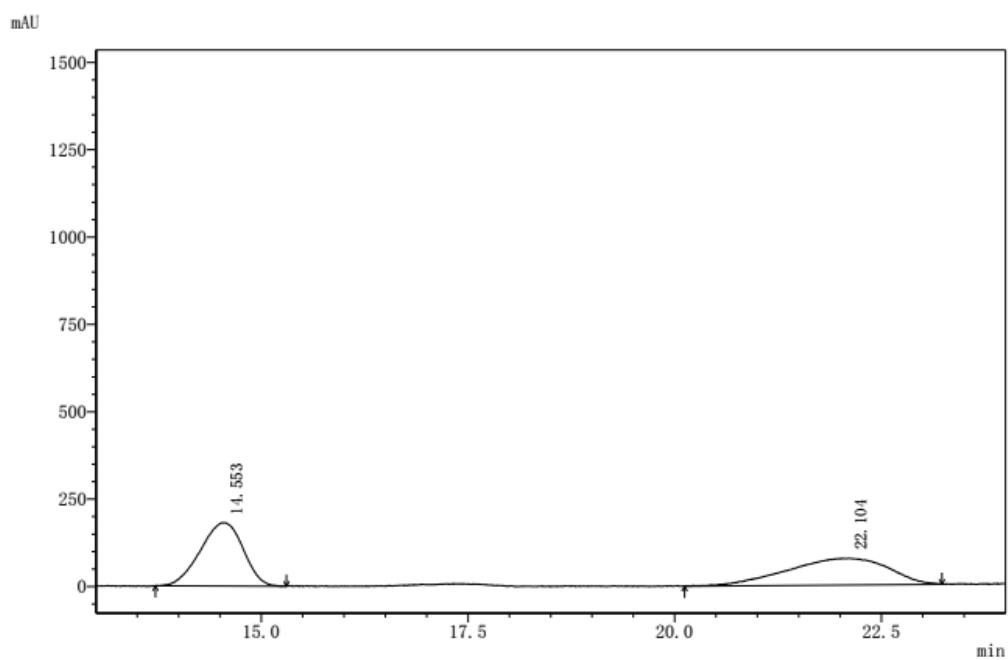

| Peak | RetTime | Area    | Height | Area%  |
|------|---------|---------|--------|--------|
| 1    | 14.553  | 6549800 | 181329 | 50.249 |
| 2    | 22.104  | 6484877 | 76175  | 49.751 |

### HPLC spectra of *enantioenriched-4ae*

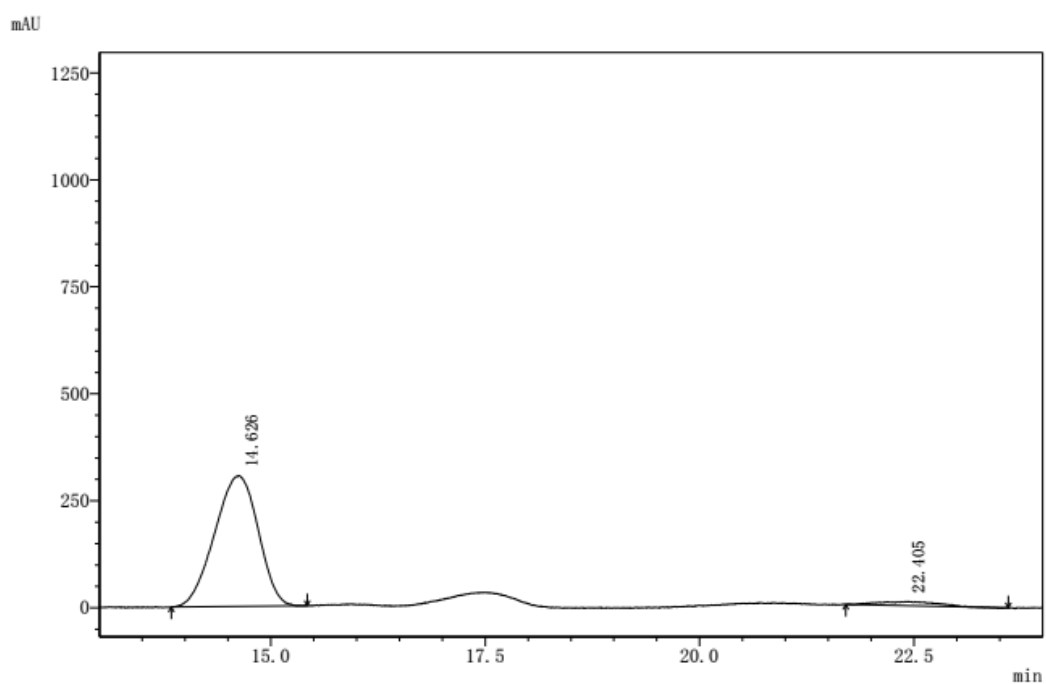

| Peak | RetTime | Area     | Height | Area%  |
|------|---------|----------|--------|--------|
| 1    | 14.626  | 10776223 | 305192 | 96.124 |
| 2    | 22.405  | 434472   | 9421   | 3.876  |

### HPLC spectra of *racemic-3af*

mAU

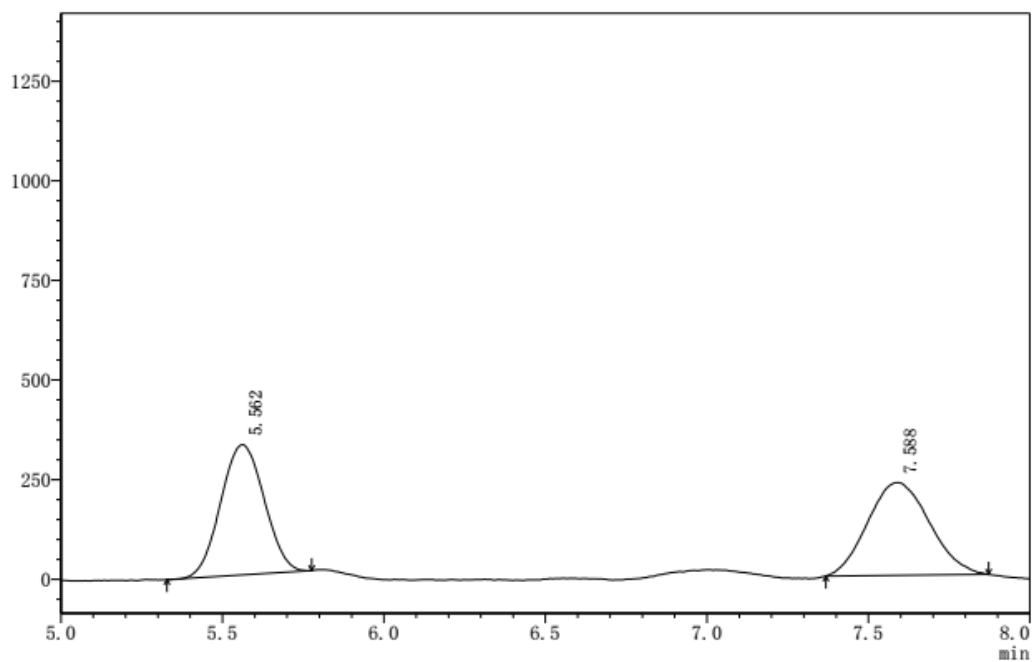

| Peak | RetTime | Area    | Height | Area%  |
|------|---------|---------|--------|--------|
| 1    | 5.562   | 3062325 | 326078 | 49.718 |
| 2    | 7.588   | 3097066 | 232382 | 50.282 |

### HPLC spectra of *enantioenriched-3af*

mAU

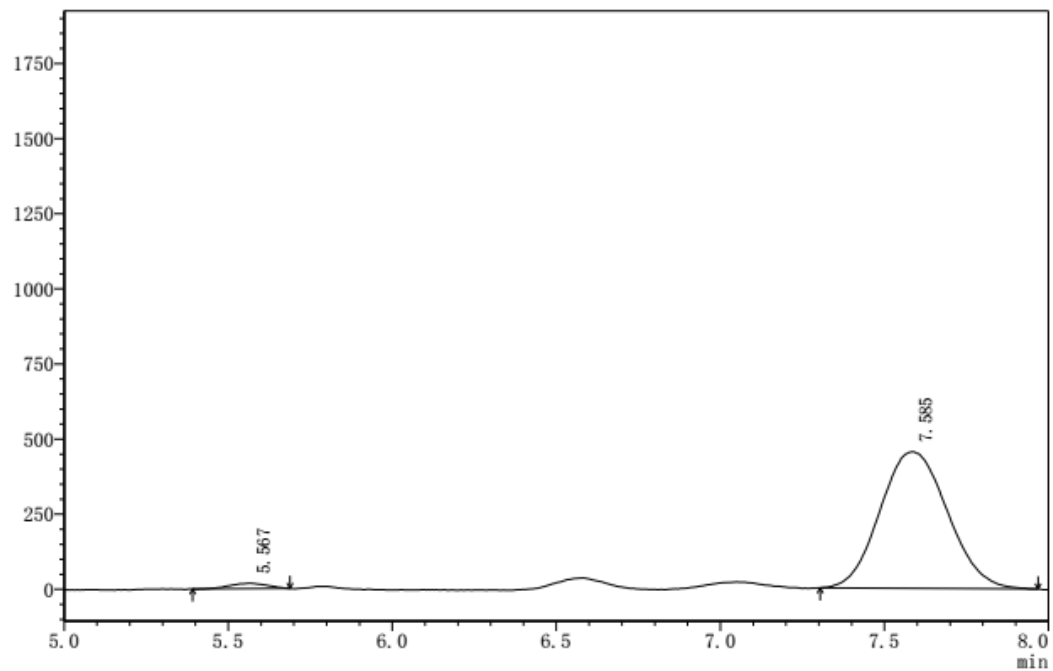

| Peak | RetTime | Area    | Height | Area%  |
|------|---------|---------|--------|--------|
| 1    | 5.567   | 141432  | 17746  | 2.130  |
| 2    | 7.585   | 6498034 | 454123 | 97.870 |

HPLC spectra of *racemic-4af*

mAU

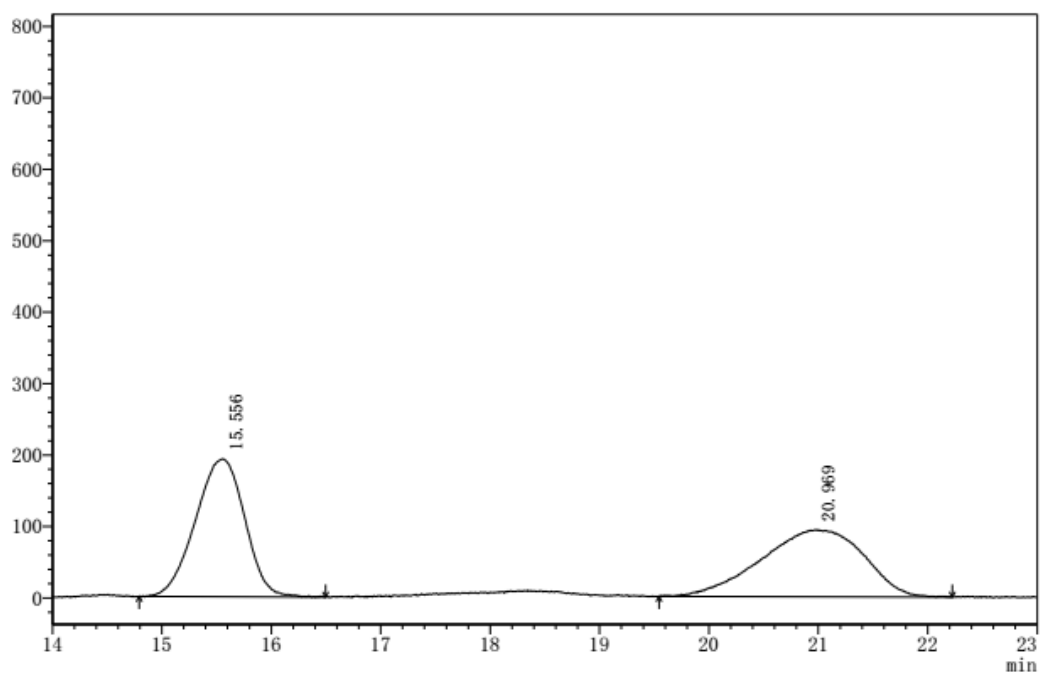

| Peak | RetTime | Area    | Height | Area%  |
|------|---------|---------|--------|--------|
| 1    | 15.556  | 6052927 | 192746 | 49.723 |
| 2    | 20.969  | 6120268 | 93699  | 50.277 |

HPLC spectra of *enantioenriched-4af*

mAU

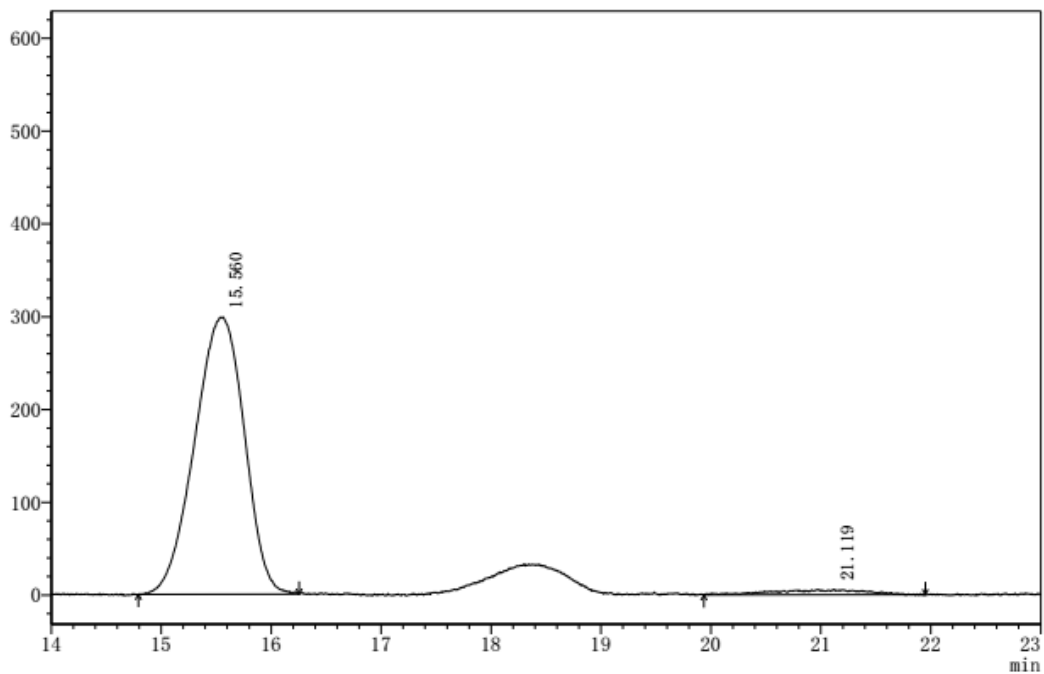

| Peak | RetTime | Area    | Height | Area%  |
|------|---------|---------|--------|--------|
| 1    | 15.560  | 9377205 | 298446 | 96.718 |
| 2    | 21.119  | 318223  | 5645   | 3.282  |

HPLC spectra of *racemic-3ag*

mAU

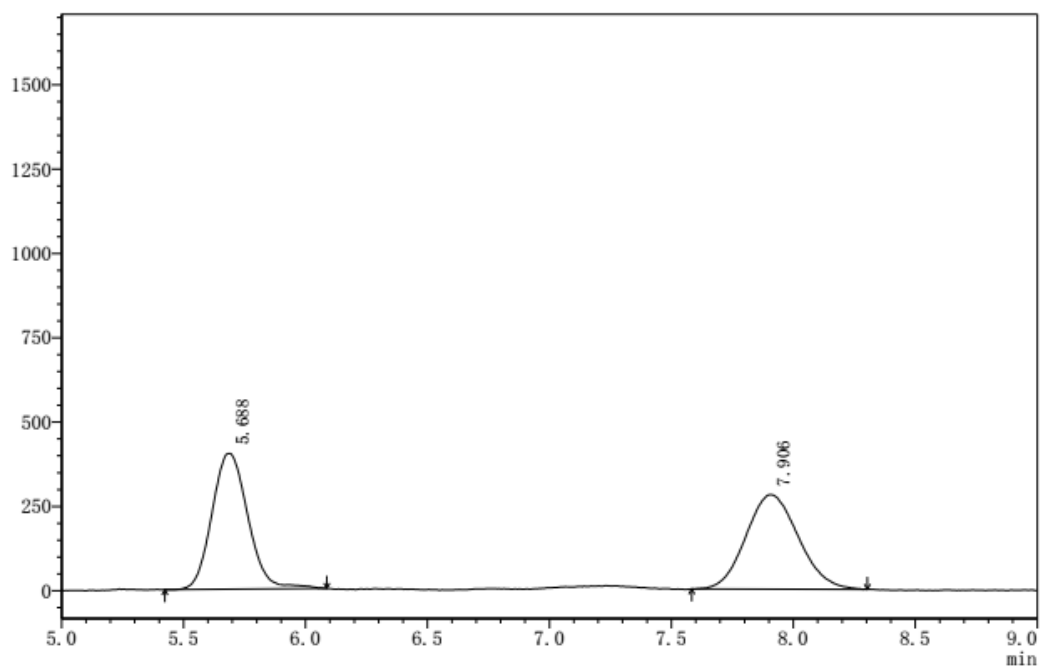

| Peak | RetTime | Area    | Height | Area%  |
|------|---------|---------|--------|--------|
| 1    | 5.688   | 4136508 | 401676 | 49.608 |
| 2    | 7.906   | 4201919 | 279884 | 50.392 |

HPLC spectra of *enantioenriched-3ag*

mAU

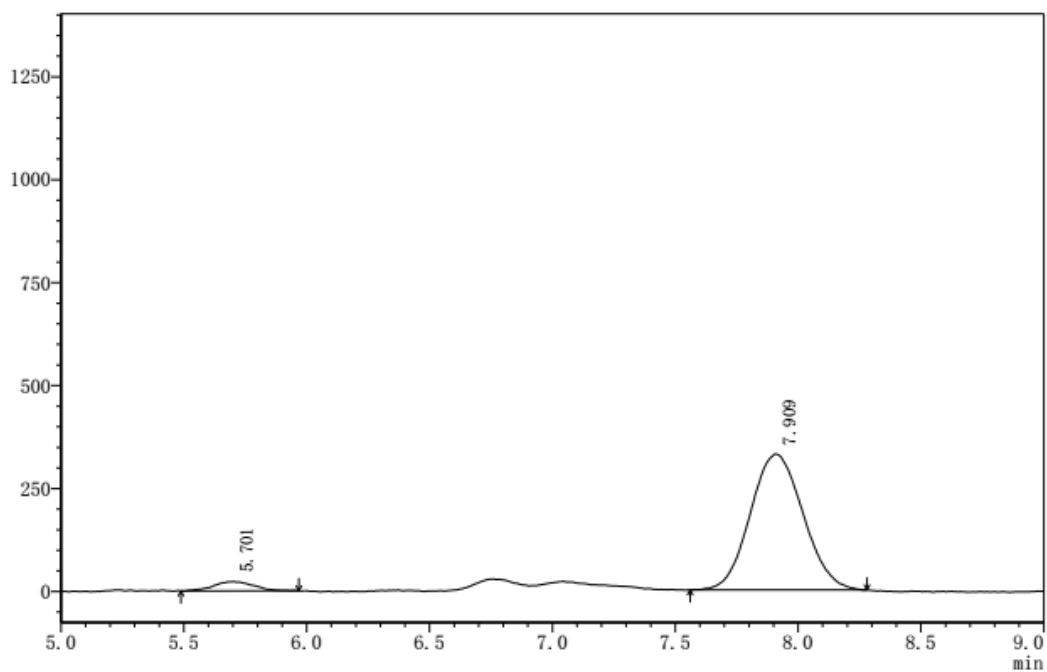

| Peak | RetTime | Area    | Height | Area%  |
|------|---------|---------|--------|--------|
| 1    | 5.701   | 251130  | 22249  | 4.835  |
| 2    | 7.909   | 4942898 | 329918 | 95.165 |

### HPLC spectra of *racemic-4ag*

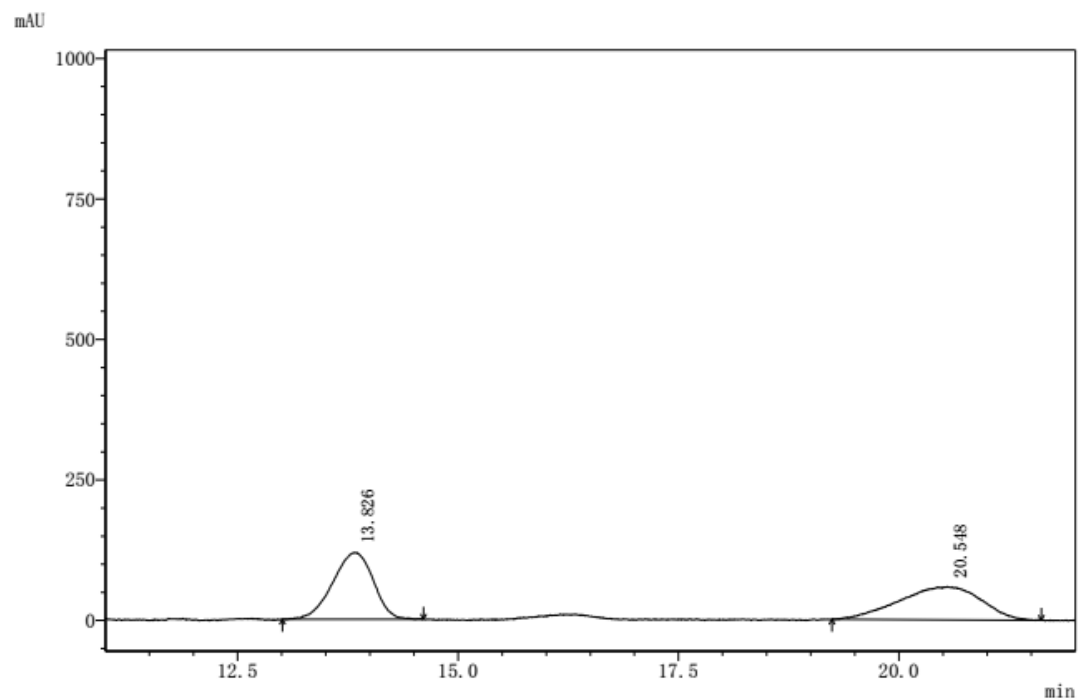

| Peak | RetTime | Area    | Height | Area%  |
|------|---------|---------|--------|--------|
| 1    | 13.826  | 3808931 | 118667 | 49.997 |
| 2    | 20.548  | 3809323 | 58725  | 50.003 |

### HPLC spectra of *enantioenriched-4ag*

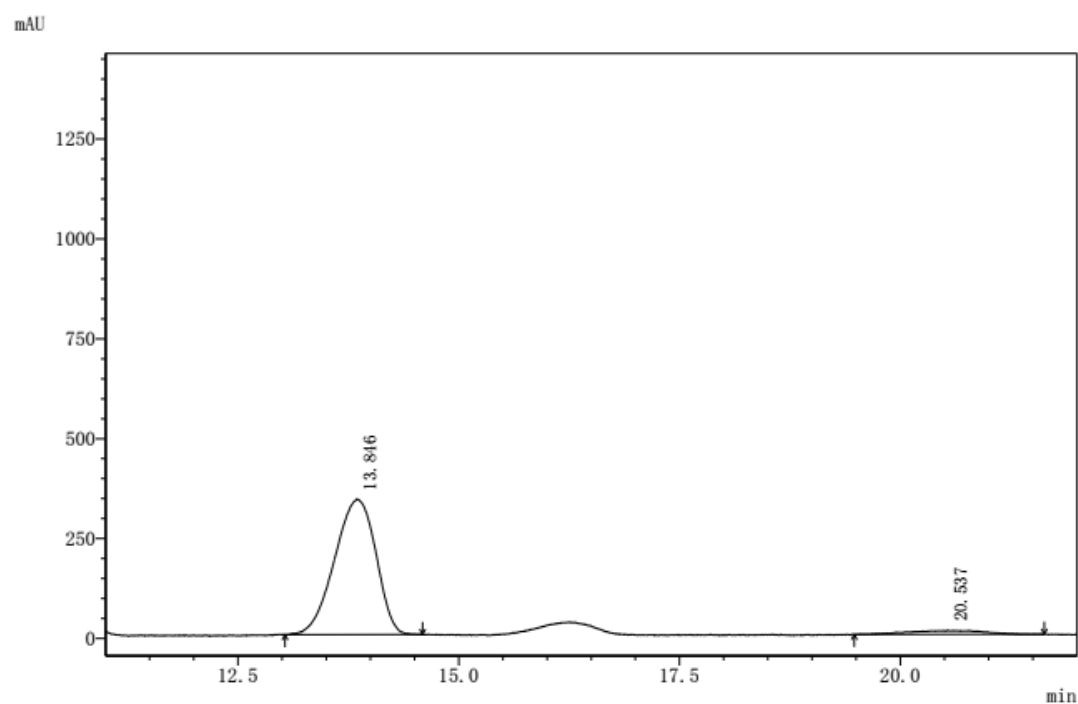

| Peak | RetTime | Area     | Height | Area%  |
|------|---------|----------|--------|--------|
| 1    | 13.846  | 11029943 | 338974 | 95.415 |
| 2    | 20.537  | 530058   | 9269   | 4.585  |

HPLC spectra of *racemic-3ah*

mAU

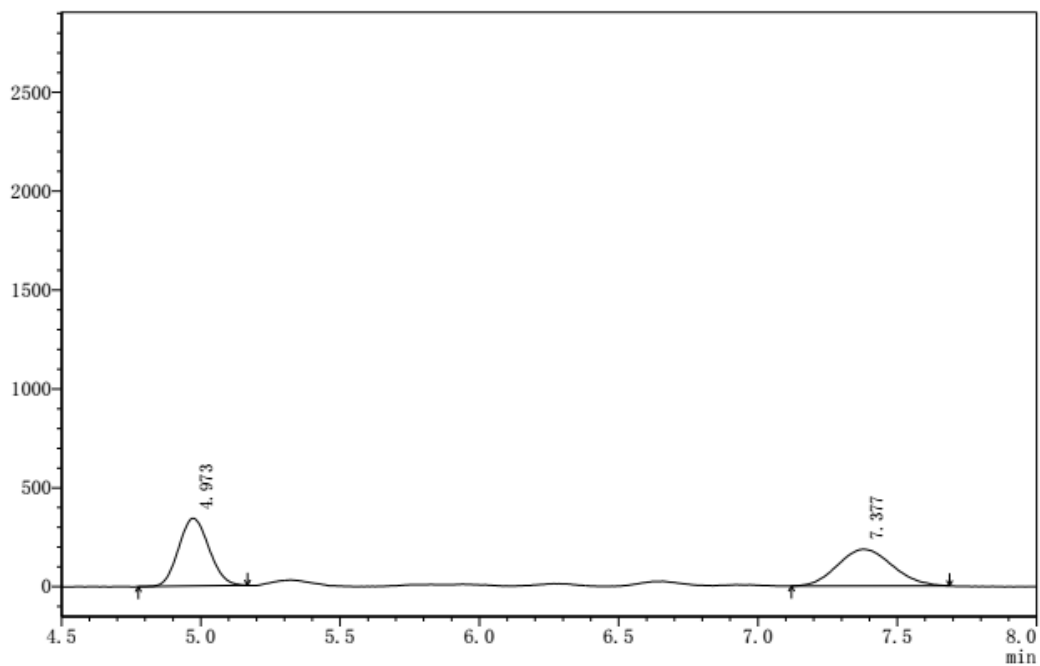

| Peak | RetTime | Area    | Height | Area%  |
|------|---------|---------|--------|--------|
| 1    | 4.973   | 2591518 | 341558 | 50.393 |
| 2    | 7.377   | 2551055 | 185778 | 49.607 |

HPLC spectra of *enantioenriched-3ah*

mAU

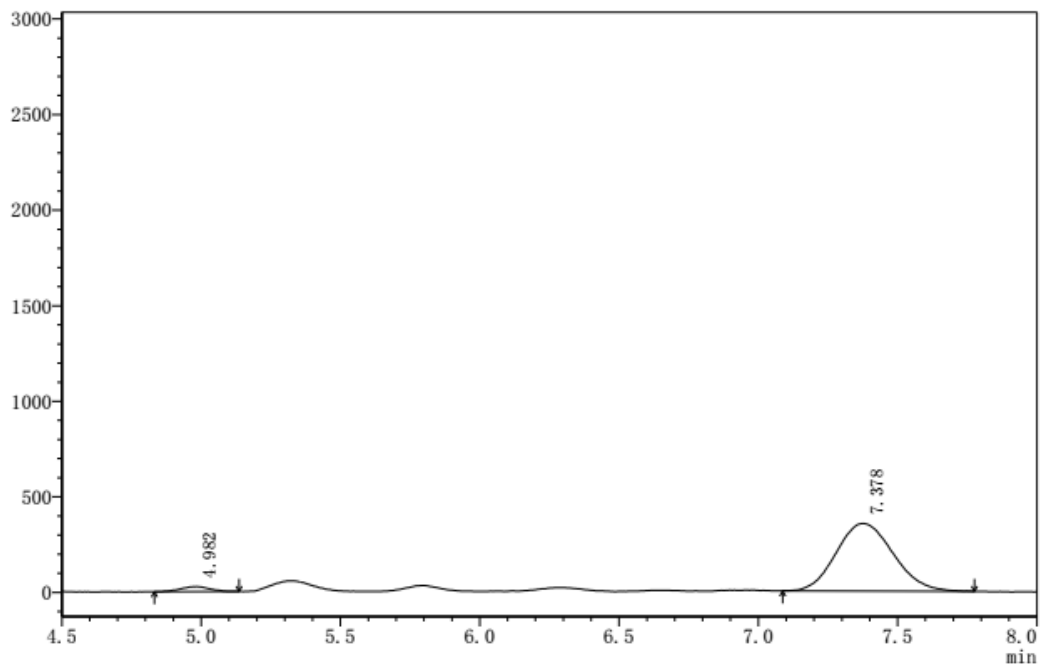

| Peak | RetTime | Area    | Height | Area%  |
|------|---------|---------|--------|--------|
| 1    | 4.982   | 181638  | 25414  | 3.488  |
| 2    | 7.378   | 5025320 | 353101 | 96.512 |

HPLC spectra of *racemic-4ah*

mAU

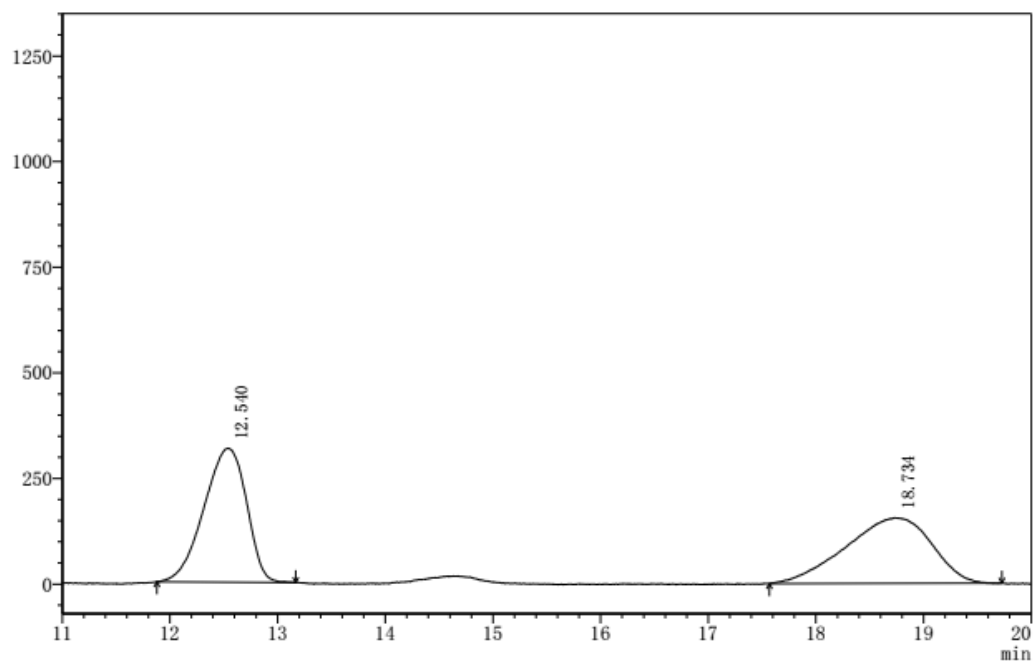

| Peak | RetTime | Area    | Height | Area%  |
|------|---------|---------|--------|--------|
| 1    | 12.540  | 8728726 | 316931 | 50.412 |
| 2    | 18.734  | 8586030 | 155214 | 49.588 |

HPLC spectra of *enantioenriched-4ah*

mAU

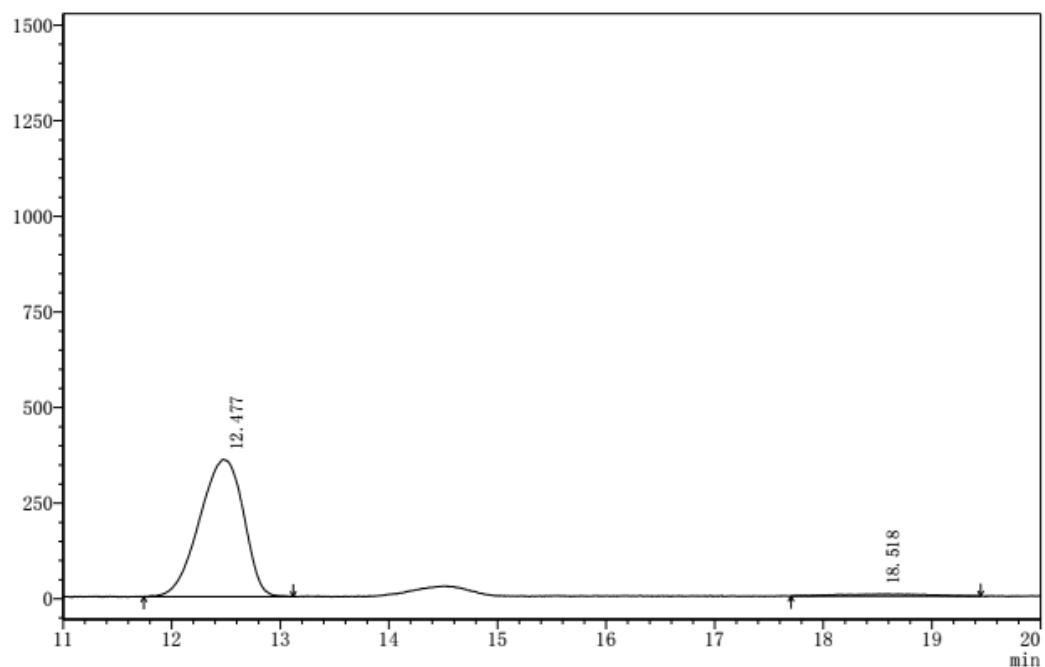

| Peak | RetTime | Area     | Height | Area%  |
|------|---------|----------|--------|--------|
| 1    | 12.477  | 10133284 | 358689 | 97.190 |
| 2    | 18.518  | 292973   | 5582   | 2.810  |

### HPLC spectra of *racemic-3ai*

mAU

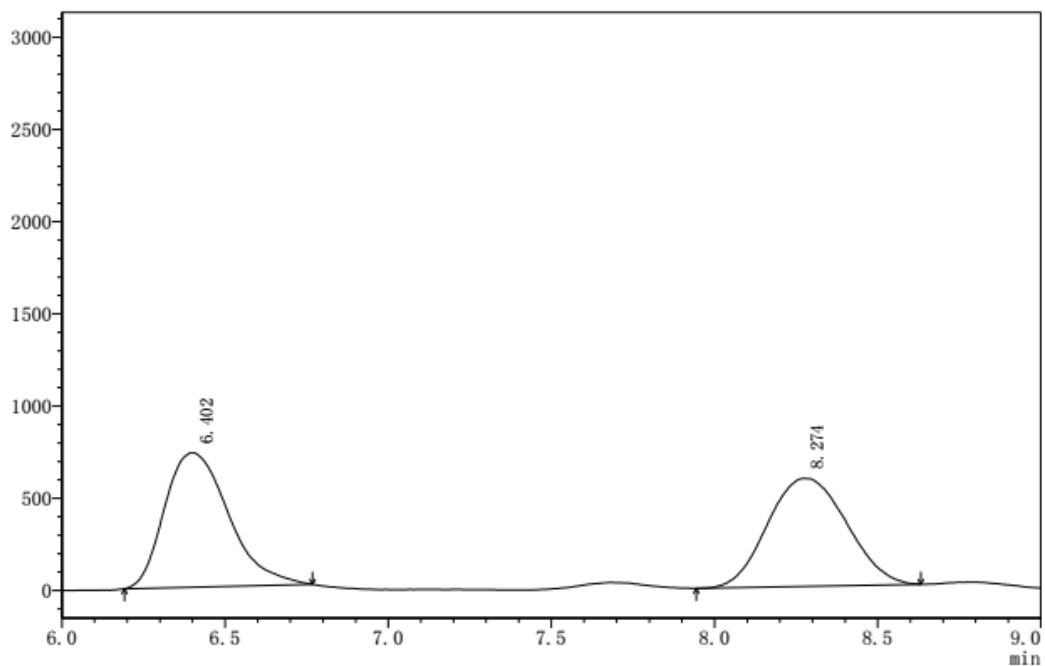

| Peak | RetTime | Area    | Height | Area%  |
|------|---------|---------|--------|--------|
| 1    | 6.402   | 9942510 | 727076 | 50.236 |
| 2    | 8.274   | 9849056 | 585460 | 49.764 |

### HPLC spectra of *enantioenriched-3ai*

mAU

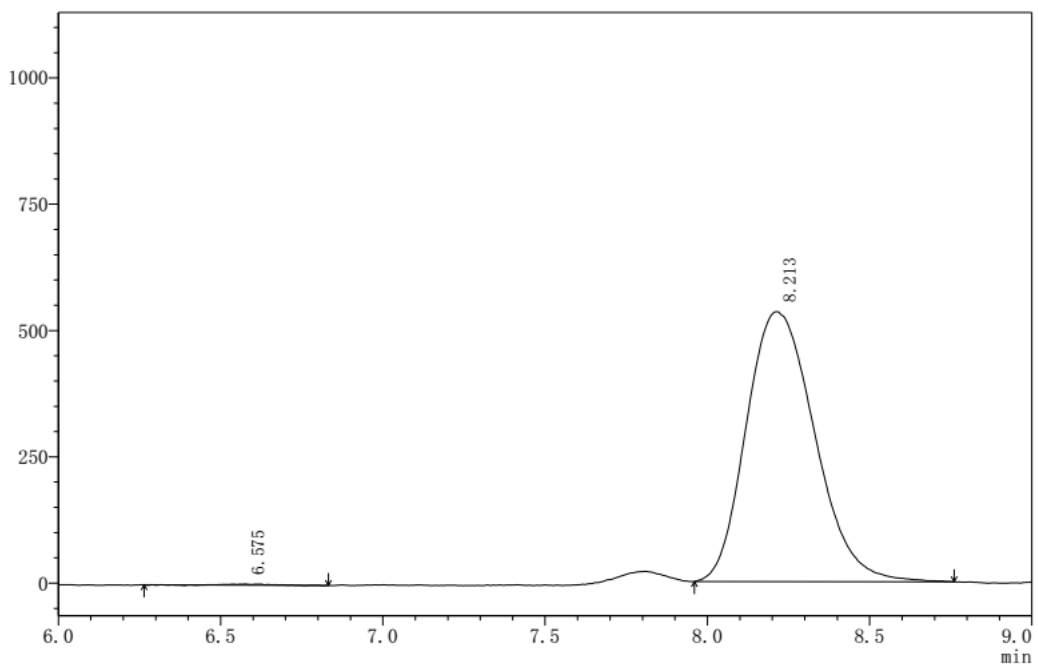

| Peak | RetTime | Area    | Height | Area%  |
|------|---------|---------|--------|--------|
| 1    | 6.575   | 23386   | 2342   | 0.297  |
| 2    | 8.213   | 7845615 | 534474 | 99.703 |



HPLC spectra of *racemic-4ai*

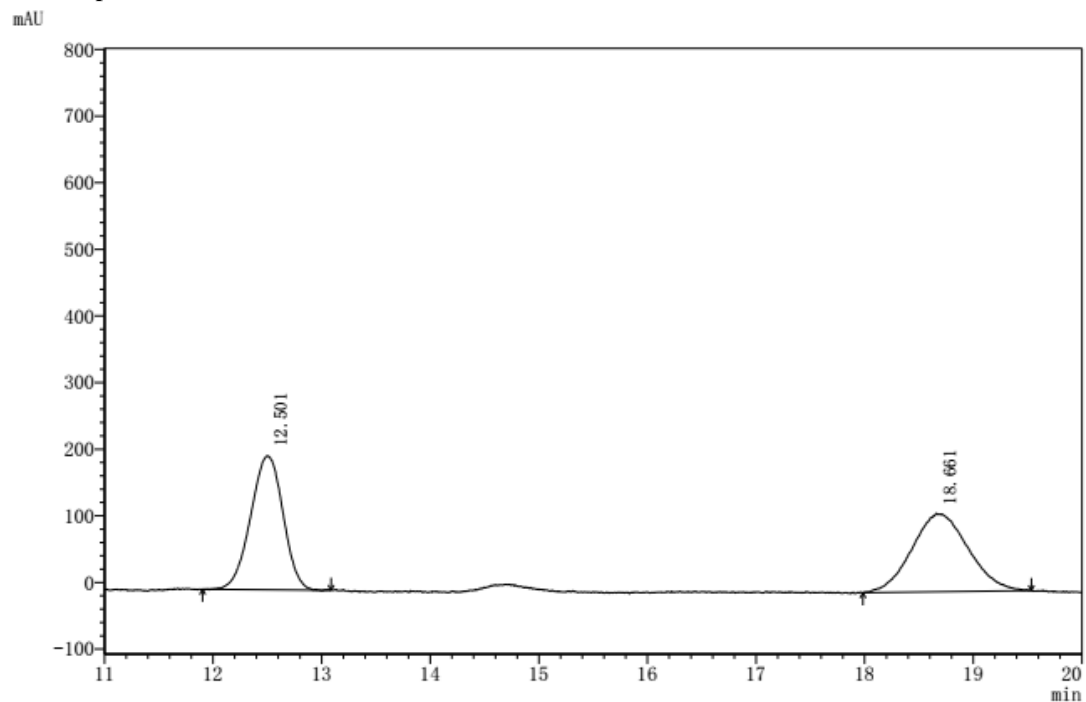

| Peak | RetTime | Area    | Height | Area%  |
|------|---------|---------|--------|--------|
| 1    | 12.501  | 4170980 | 200896 | 49.808 |
| 2    | 18.661  | 4203080 | 117205 | 50.192 |

HPLC spectra of *enantioenriched-4ai*

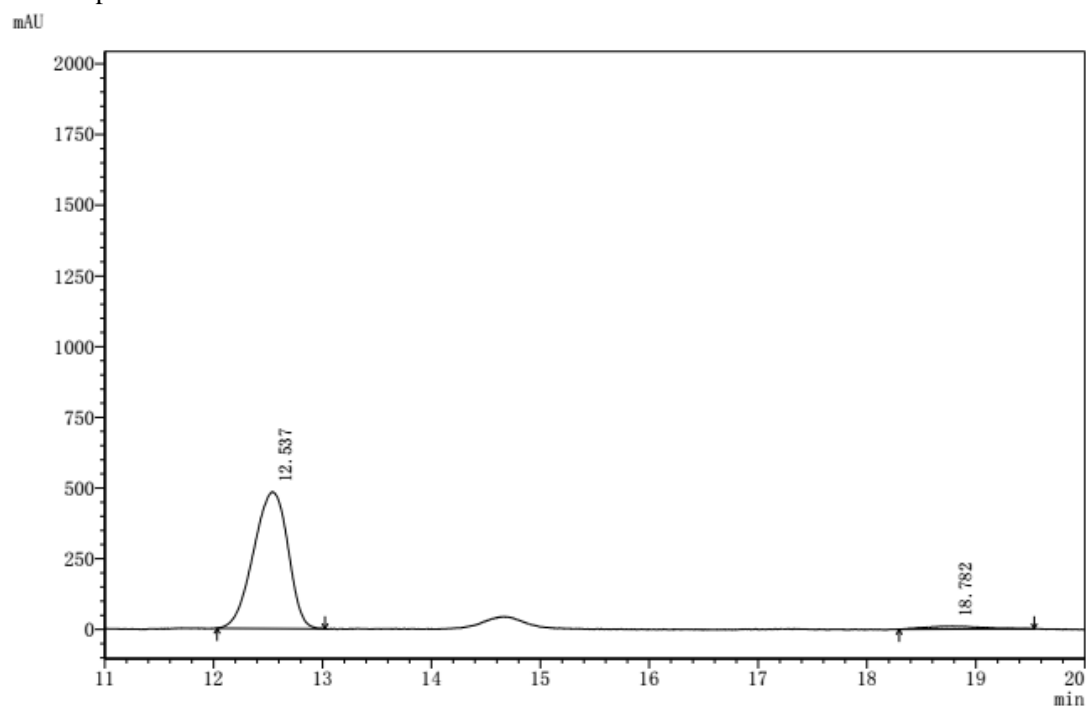

| Peak | RetTime | Area     | Height | Area%  |
|------|---------|----------|--------|--------|
| 1    | 12.537  | 10640953 | 482765 | 96.644 |
| 2    | 18.782  | 369468   | 10196  | 3.356  |

HPLC spectra of **racemic-3aj**

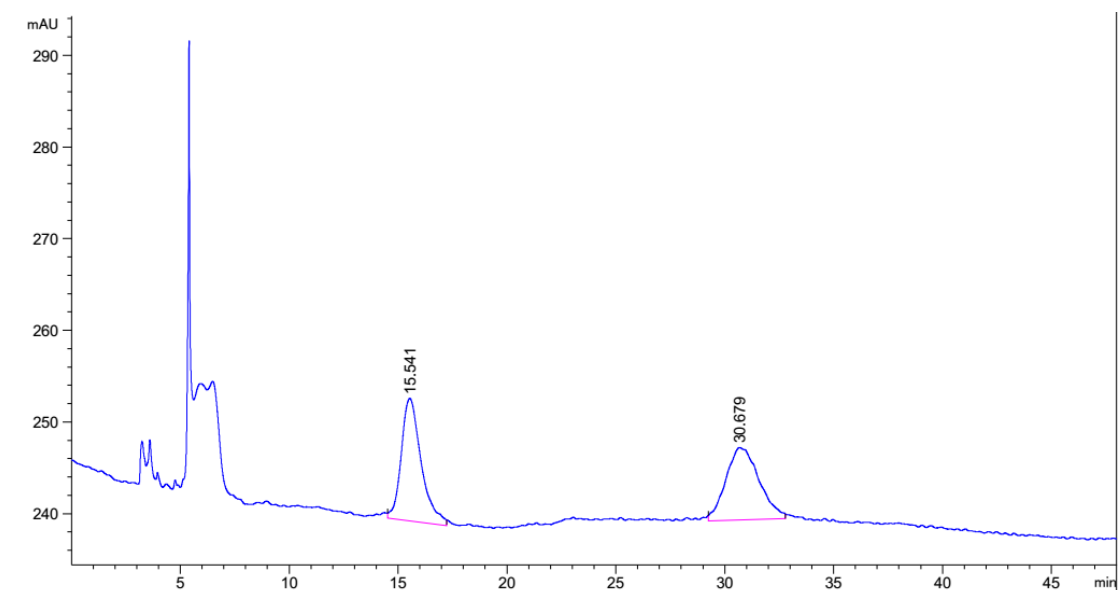

| Peak | RetTime | Area      | Height   | Area% |
|------|---------|-----------|----------|-------|
| 1    | 15.54   | 852.45789 | 13.36509 | 50.5  |
| 2    | 30.68   | 836.43781 | 7.88785  | 49.5  |

HPLC spectra of **enantioenriched-3aj**

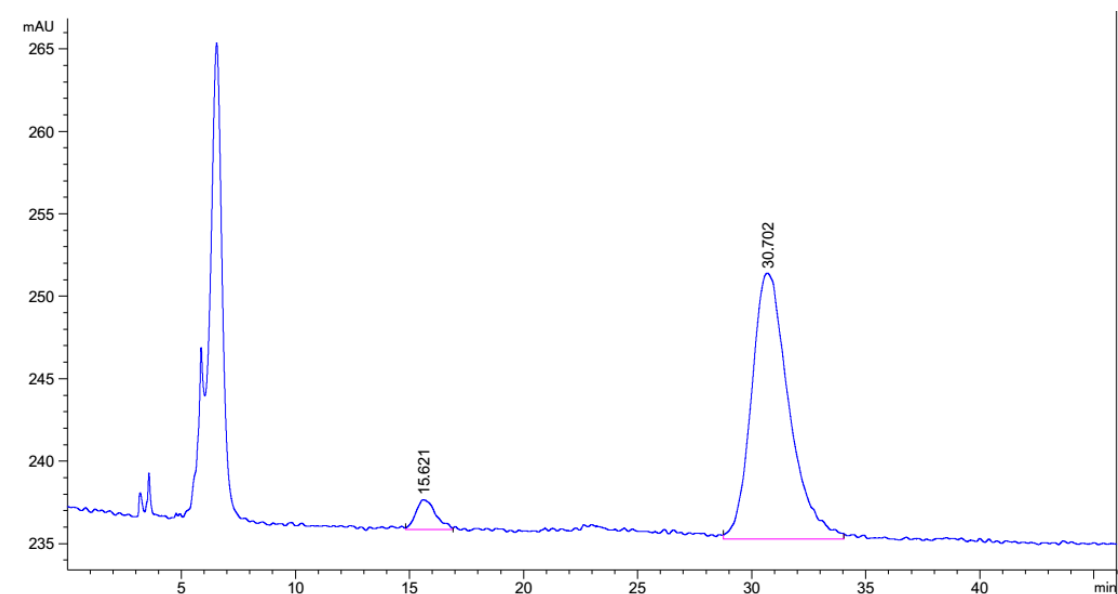

| Peak | RetTime | Area       | Height   | Area% |
|------|---------|------------|----------|-------|
| 1    | 15.62   | 111.60094  | 1.81803  | 5.7   |
| 2    | 30.70   | 1834.08960 | 16.11733 | 94.3  |

HPLC spectra of *racemic-3ak*

mAU

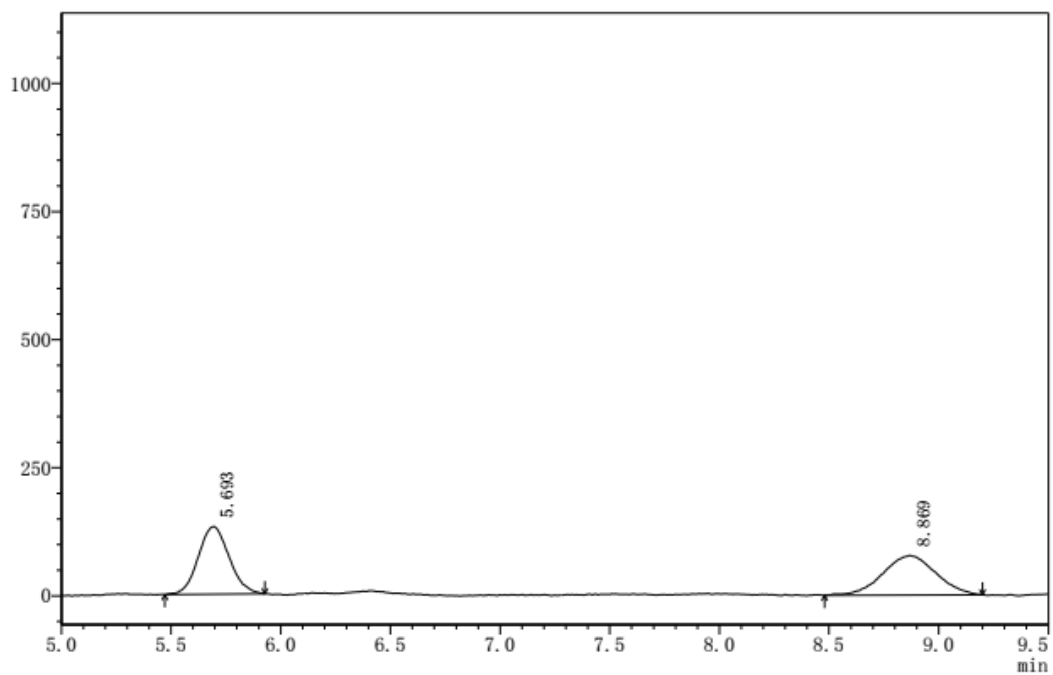

| Peak | RetTime | Area    | Height | Area%  |
|------|---------|---------|--------|--------|
| 1    | 5.693   | 1289295 | 131724 | 49.922 |
| 2    | 8.869   | 1293318 | 77220  | 50.078 |

HPLC spectra of *enantioenriched-3ak*

mAU

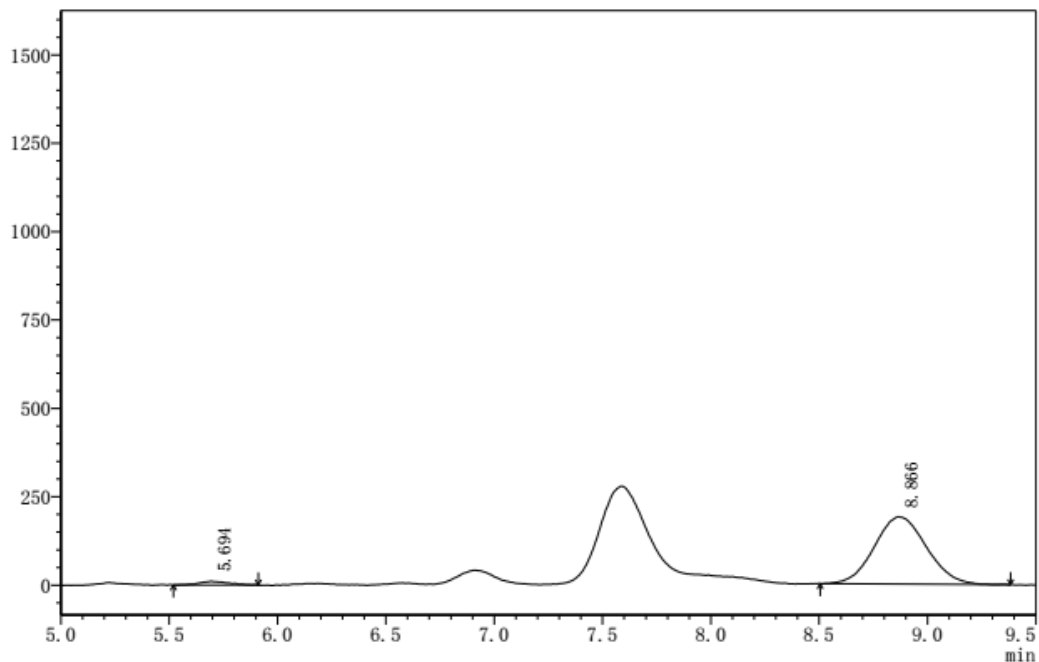

| Peak | RetTime | Area    | Height | Area%  |
|------|---------|---------|--------|--------|
| 1    | 5.694   | 95991   | 10333  | 2.927  |
| 2    | 8.866   | 3182966 | 189990 | 97.073 |

### HPLC spectra of *racemic-4ak*

mAU

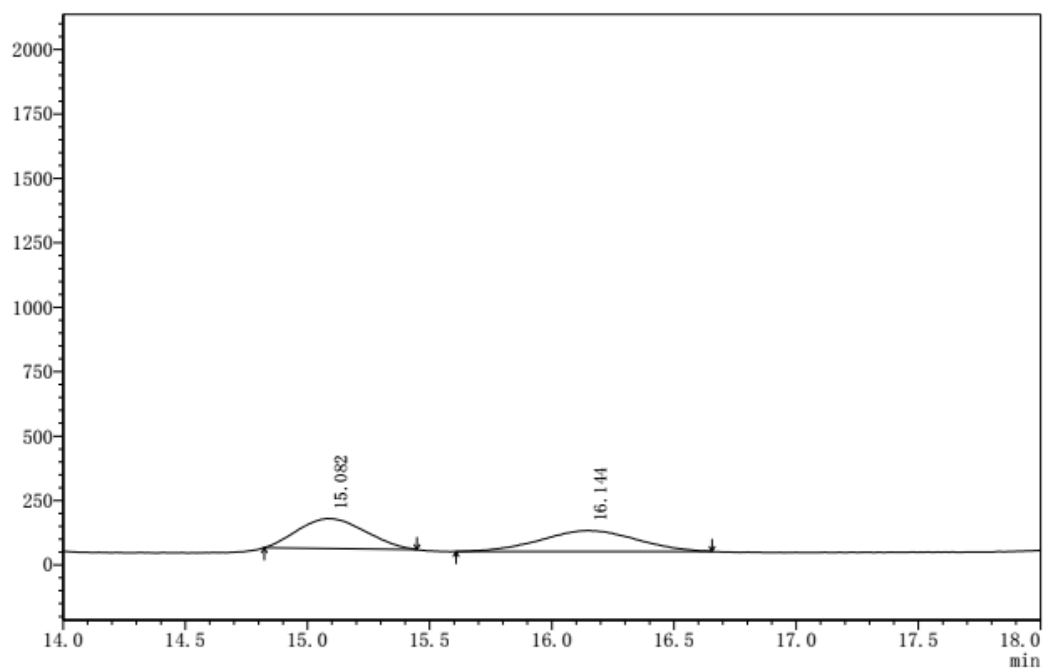

| Peak | RetTime | Area    | Height | Area%  |
|------|---------|---------|--------|--------|
| 1    | 15.082  | 2232871 | 115912 | 50.222 |
| 2    | 16.144  | 2213171 | 80978  | 49.778 |

### HPLC spectra of *enantioenriched-4ak*

mAU

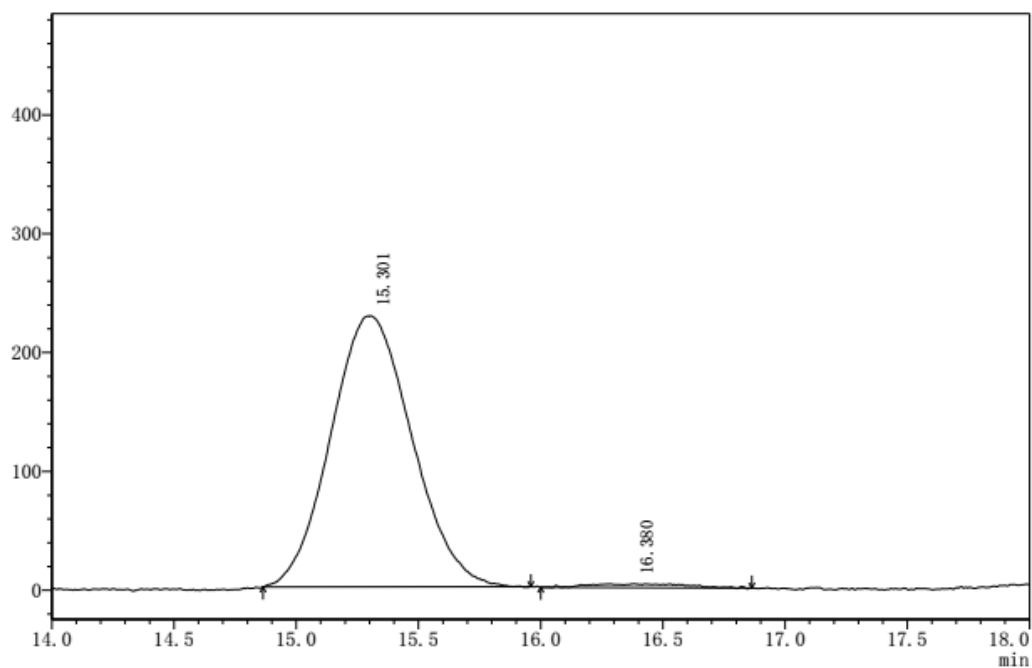

| Peak | RetTime | Area    | Height | Area%  |
|------|---------|---------|--------|--------|
| 1    | 15.301  | 5268465 | 227879 | 98.442 |
| 2    | 16.380  | 83391   | 3152   | 1.558  |

HPLC spectra of *racemic-3al*

mAU

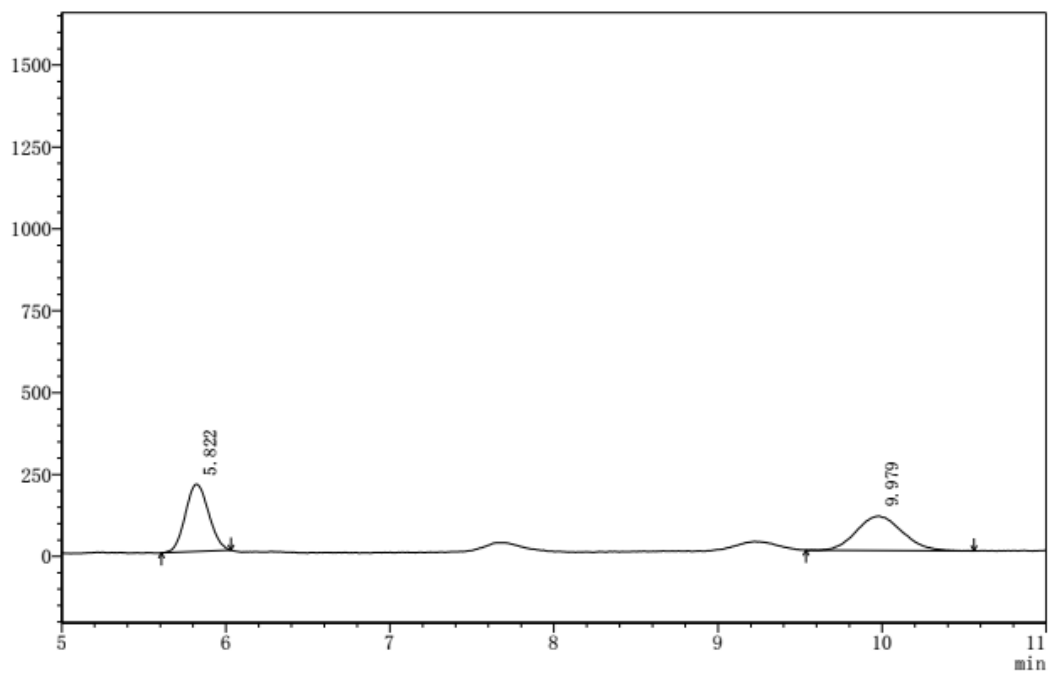

| Peak | RetTime | Area    | Height | Area%  |
|------|---------|---------|--------|--------|
| 1    | 5.822   | 4703883 | 166411 | 49.765 |
| 2    | 9.979   | 4748247 | 122015 | 50.235 |

HPLC spectra of *enantioenriched-3al*

mAU

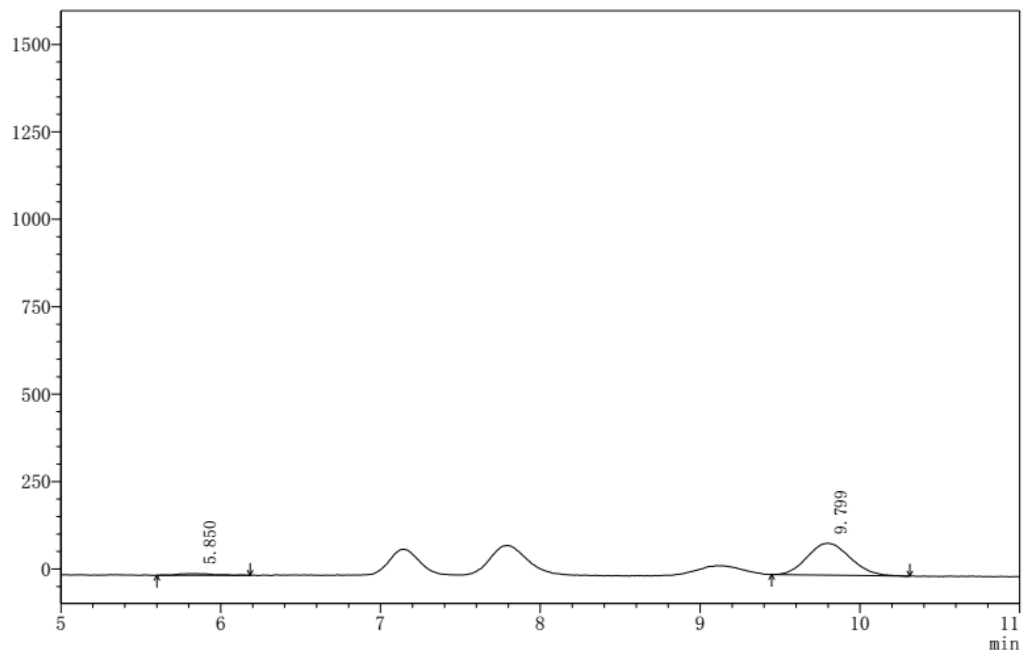

| Peak | RetTime | Area    | Height | Area%  |
|------|---------|---------|--------|--------|
| 1    | 5.850   | 66661   | 4712   | 3.781  |
| 2    | 9.799   | 1696455 | 91209  | 96.219 |

HPLC spectra of *racemic-4al*

mAU

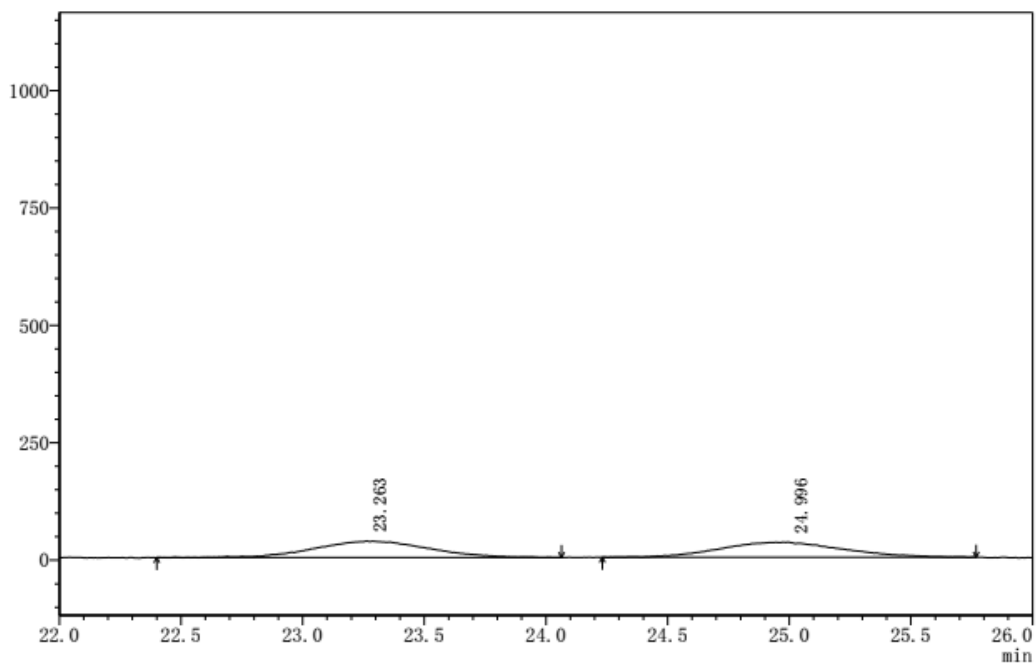

| Peak | RetTime | Area    | Height | Area%  |
|------|---------|---------|--------|--------|
| 1    | 23.263  | 1122480 | 34912  | 50.195 |
| 2    | 24.996  | 1113771 | 32196  | 49.805 |

HPLC spectra of *enantioenriched-4al*

mAU

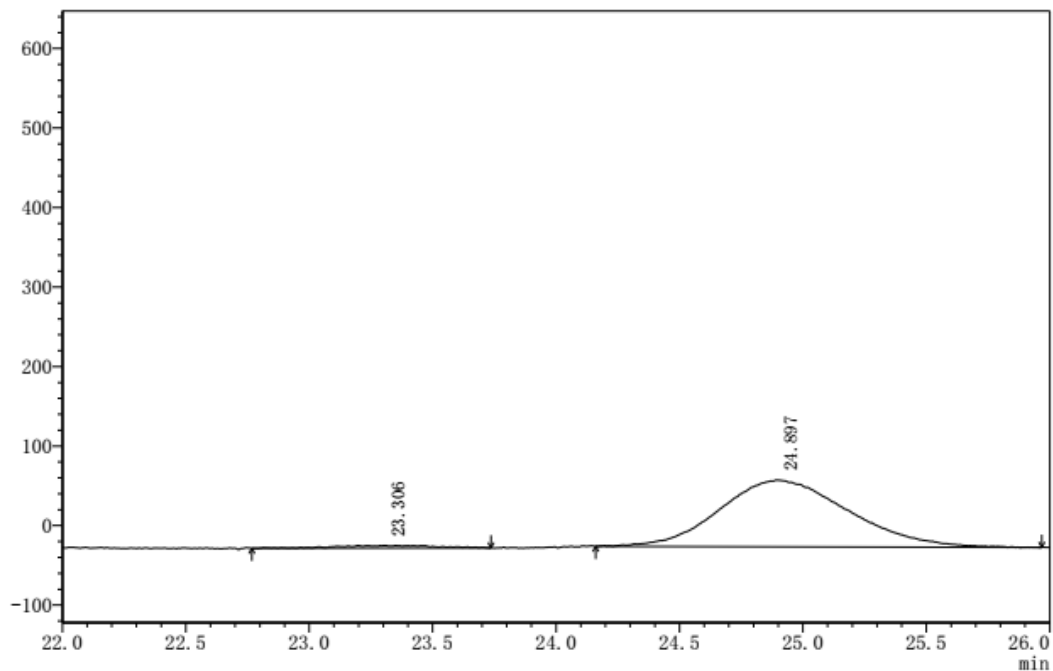

| Peak | RetTime | Area    | Height | Area%  |
|------|---------|---------|--------|--------|
| 1    | 23.306  | 92466   | 3317   | 2.953  |
| 2    | 24.897  | 3038695 | 83797  | 97.047 |

HPLC spectra of *racemic-3am*

mAU

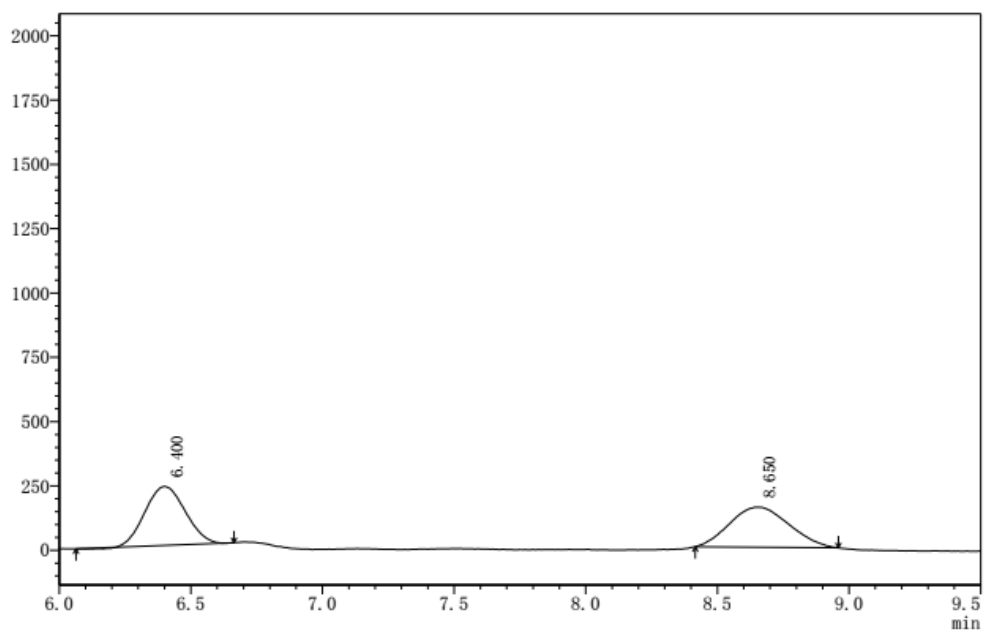

| Peak | RetTime | Area    | Height | Area%  |
|------|---------|---------|--------|--------|
| 1    | 6.400   | 2418414 | 228678 | 49.747 |
| 2    | 8.650   | 2442972 | 155569 | 50.253 |

HPLC spectra of *enantioenriched-3am*

mAU

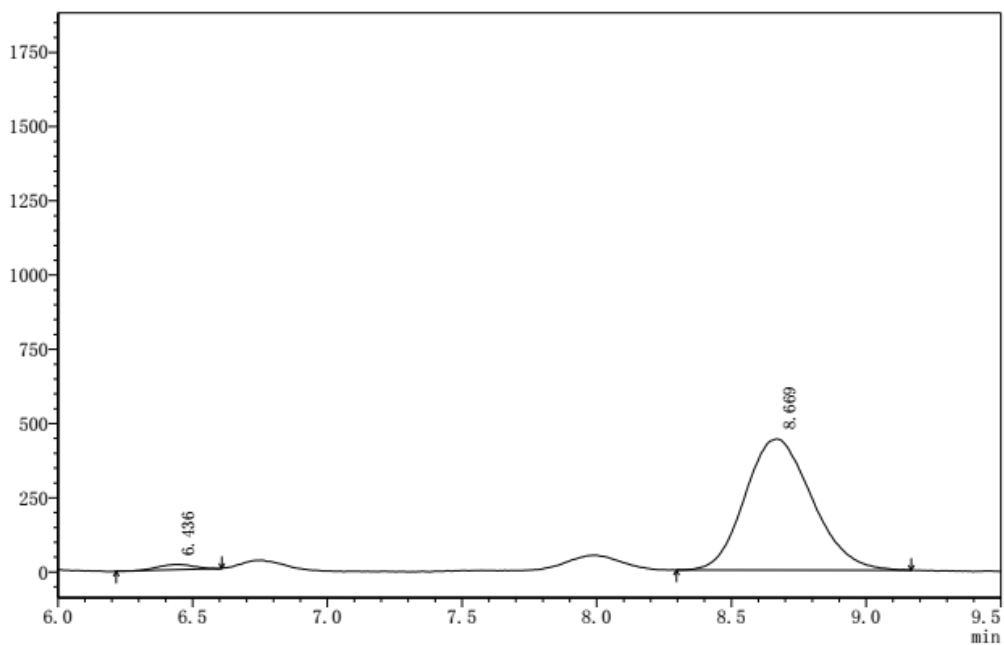

| Peak | RetTime | Area    | Height | Area%  |
|------|---------|---------|--------|--------|
| 1    | 6.436   | 151105  | 17140  | 1.934  |
| 2    | 8.669   | 7660130 | 442006 | 98.066 |

### HPLC spectra of *racemic-4am*

mAU

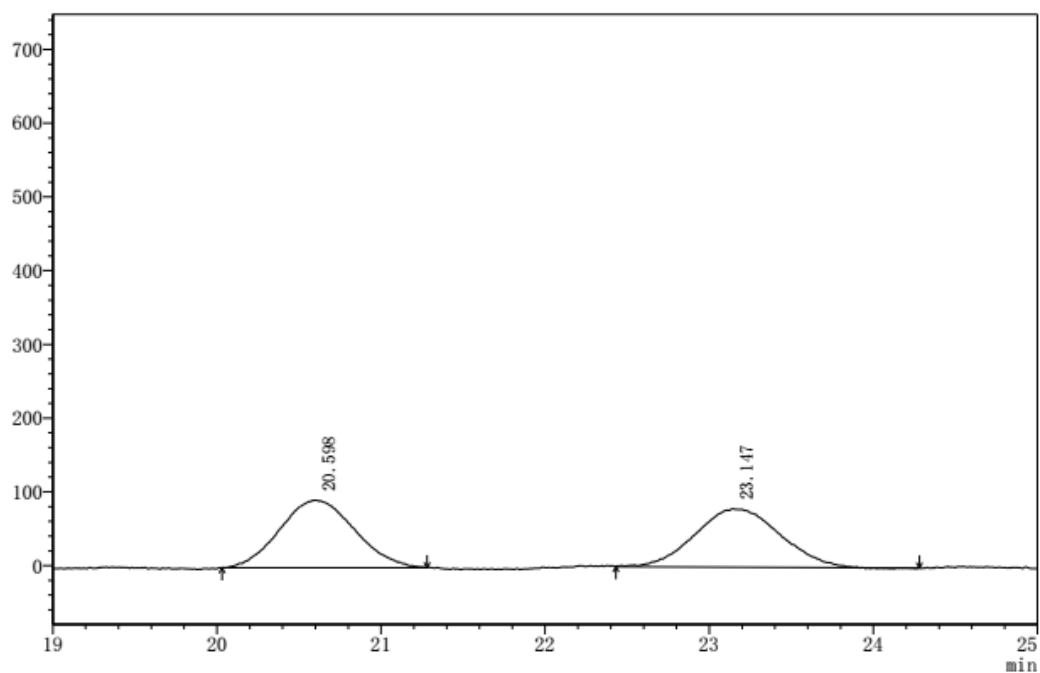

| Peak | RetTime | Area    | Height | Area%  |
|------|---------|---------|--------|--------|
| 1    | 20.598  | 2894974 | 91346  | 50.463 |
| 2    | 23.147  | 2841863 | 78979  | 49.537 |

### HPLC spectra of *enantioenriched-4am*

mAU

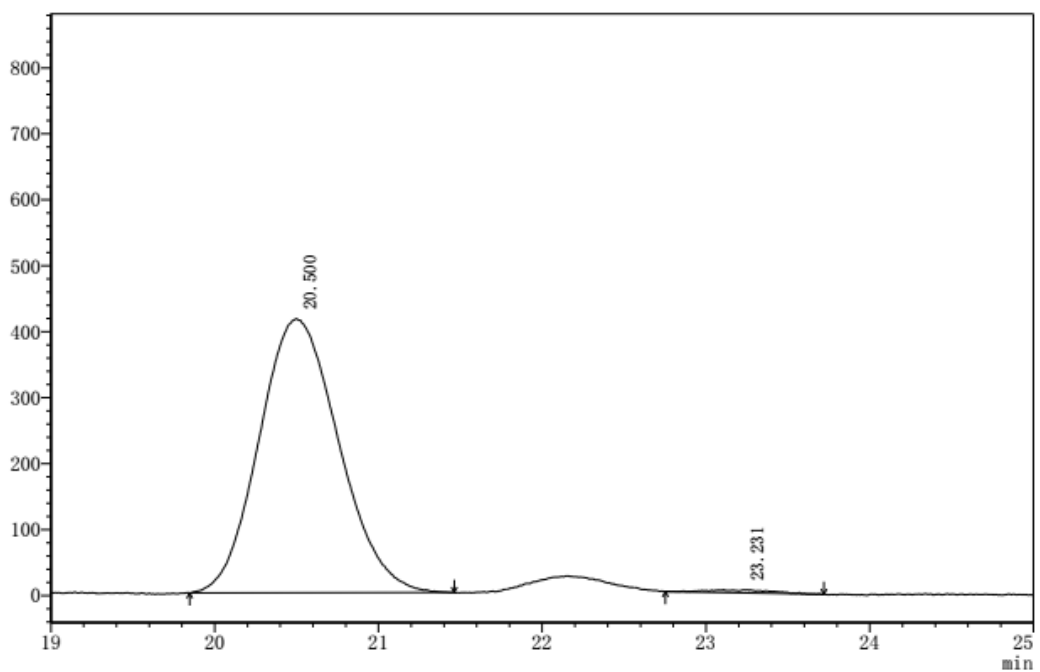

| Peak | RetTime | Area     | Height | Area%  |
|------|---------|----------|--------|--------|
| 1    | 20.500  | 14024952 | 415263 | 99.155 |
| 2    | 23.231  | 119452   | 4648   | 0.845  |



### HPLC spectra of *racemic-3an*

mAU

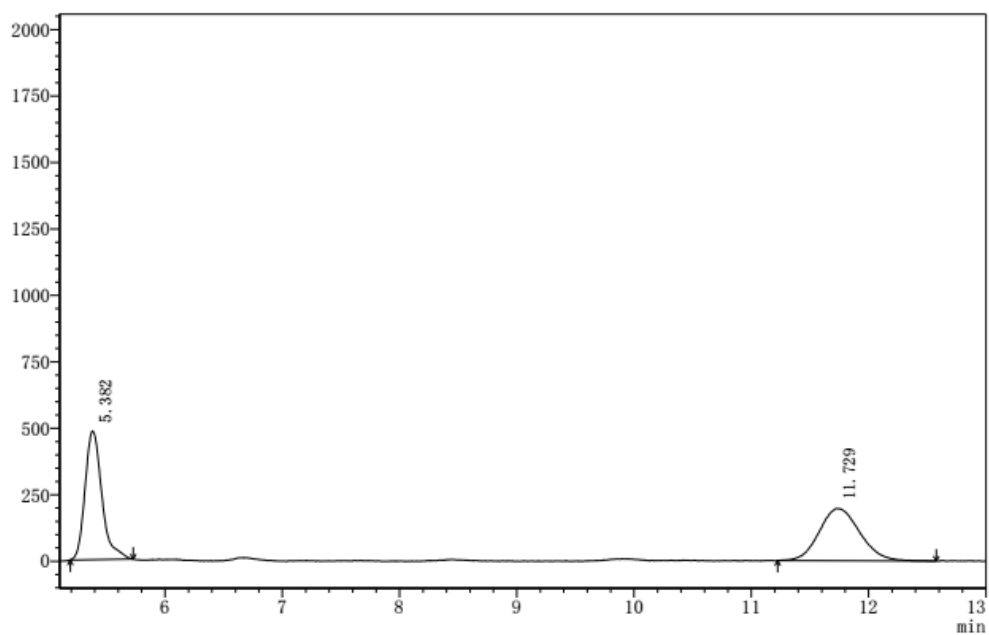

| Peak | RetTime | Area    | Height | Area%  |
|------|---------|---------|--------|--------|
| 1    | 5.382   | 4836968 | 483753 | 50.586 |
| 2    | 11.729  | 4724845 | 196109 | 49.414 |

### HPLC spectra of *enantioenriched-3an*

mAU

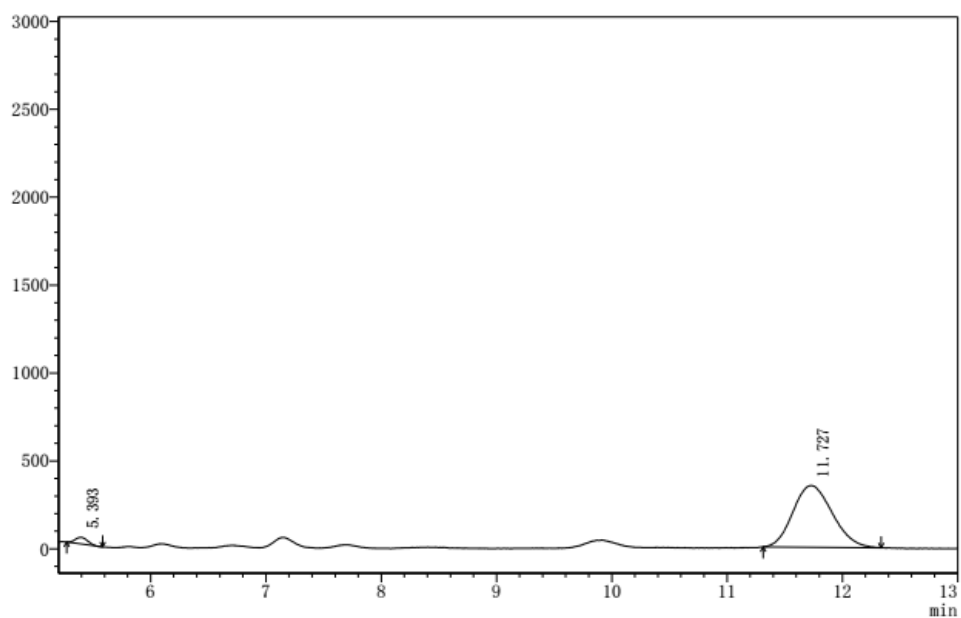

| Peak | RetTime | Area    | Height | Area%  |
|------|---------|---------|--------|--------|
| 1    | 5.393   | 277595  | 37634  | 3.223  |
| 2    | 11.727  | 8335984 | 350979 | 96.777 |

HPLC spectra of *racemic-4an*

mAU

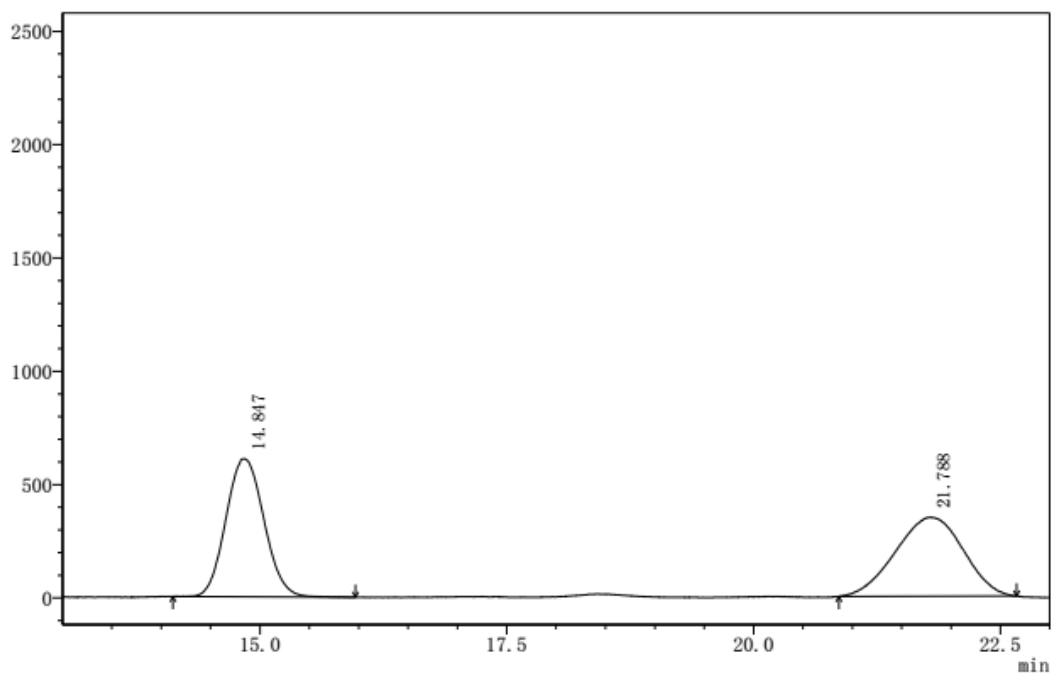

| Peak | RetTime | Area     | Height | Area%  |
|------|---------|----------|--------|--------|
| 1    | 14.847  | 16362108 | 609331 | 49.619 |
| 2    | 21.788  | 16613211 | 348746 | 50.381 |

HPLC spectra of *enantioenriched-4an*

mAU

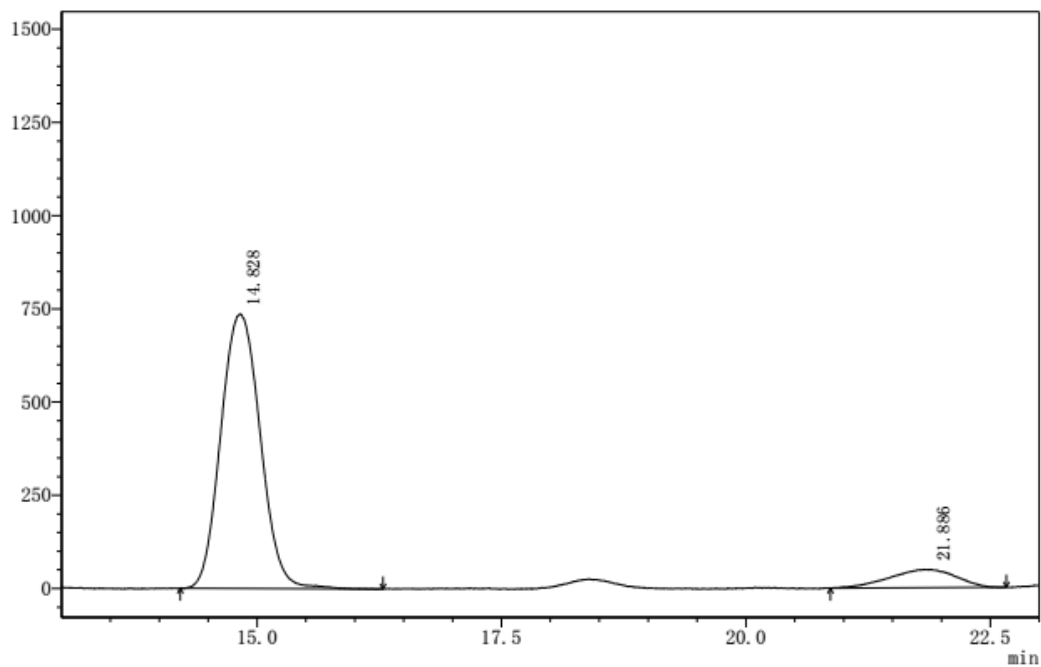

| Peak | RetTime | Area     | Height | Area%  |
|------|---------|----------|--------|--------|
| 1    | 14.828  | 20686224 | 736243 | 90.090 |
| 2    | 21.886  | 2275425  | 48452  | 9.910  |

HPLC spectra of *racemic-3ao*

mAU

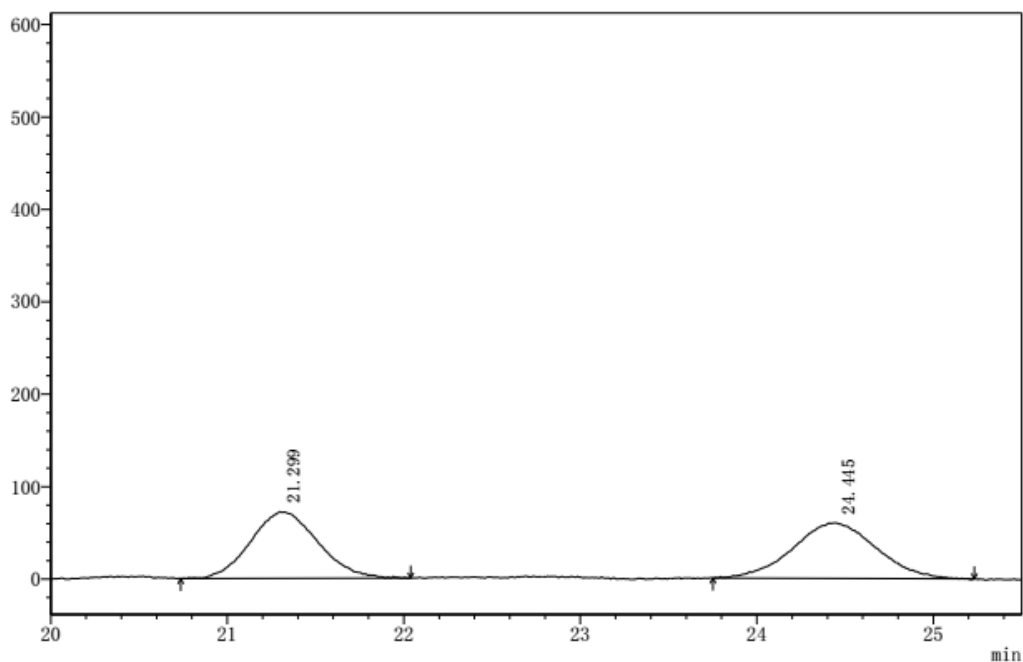

| Peak | RetTime | Area    | Height | Area%  |
|------|---------|---------|--------|--------|
| 1    | 21.299  | 1894483 | 71836  | 49.145 |
| 2    | 24.445  | 1960414 | 60010  | 50.855 |

HPLC spectra of *enantioenriched-3ao*

mAU

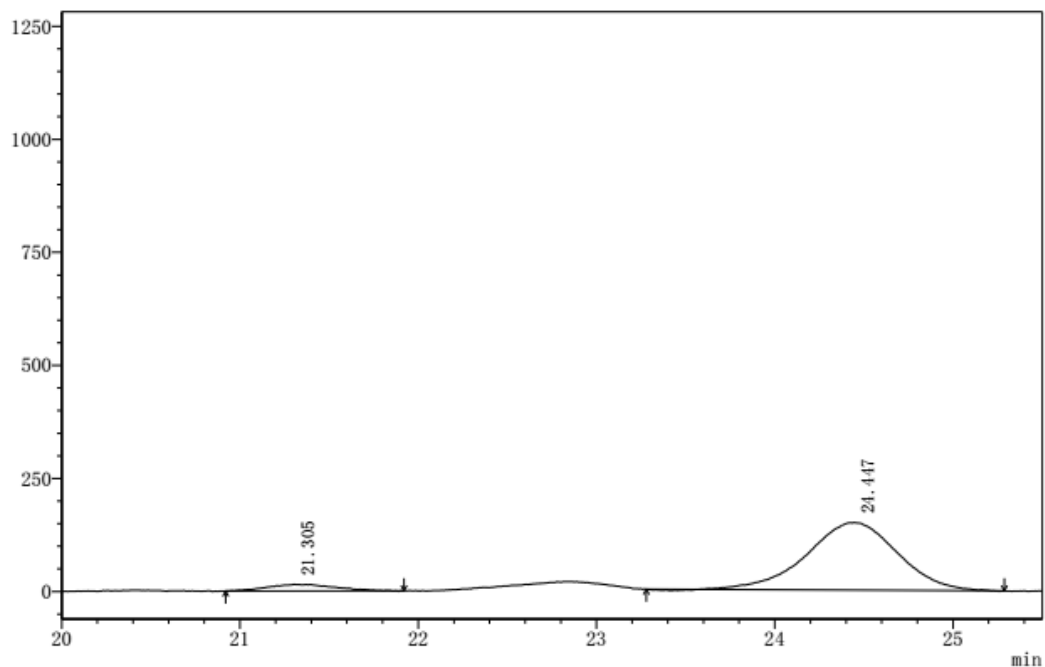

| Peak | RetTime | Area    | Height | Area%  |
|------|---------|---------|--------|--------|
| 1    | 21.305  | 363899  | 14275  | 6.442  |
| 2    | 24.447  | 5284929 | 149592 | 93.558 |

### HPLC spectra of *racemic-4ao*

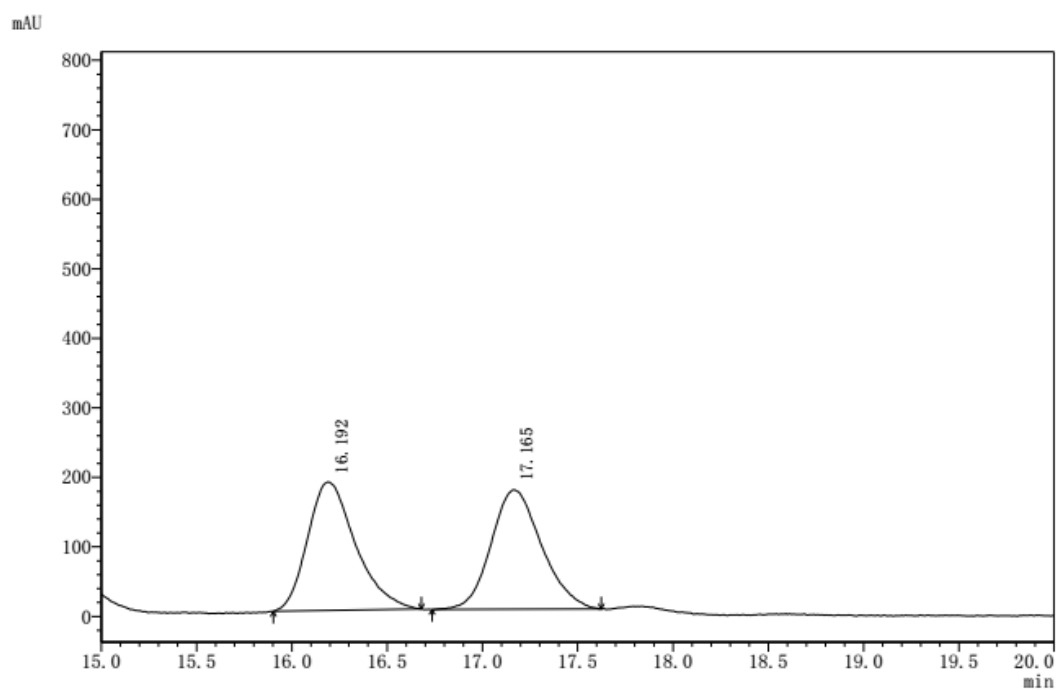

| Peak | RetTime | Area    | Height | Area%  |
|------|---------|---------|--------|--------|
| 1    | 16.192  | 3234023 | 184629 | 50.518 |
| 2    | 17.165  | 3167757 | 171682 | 49.482 |

### HPLC spectra of *enantioenriched-4ao*

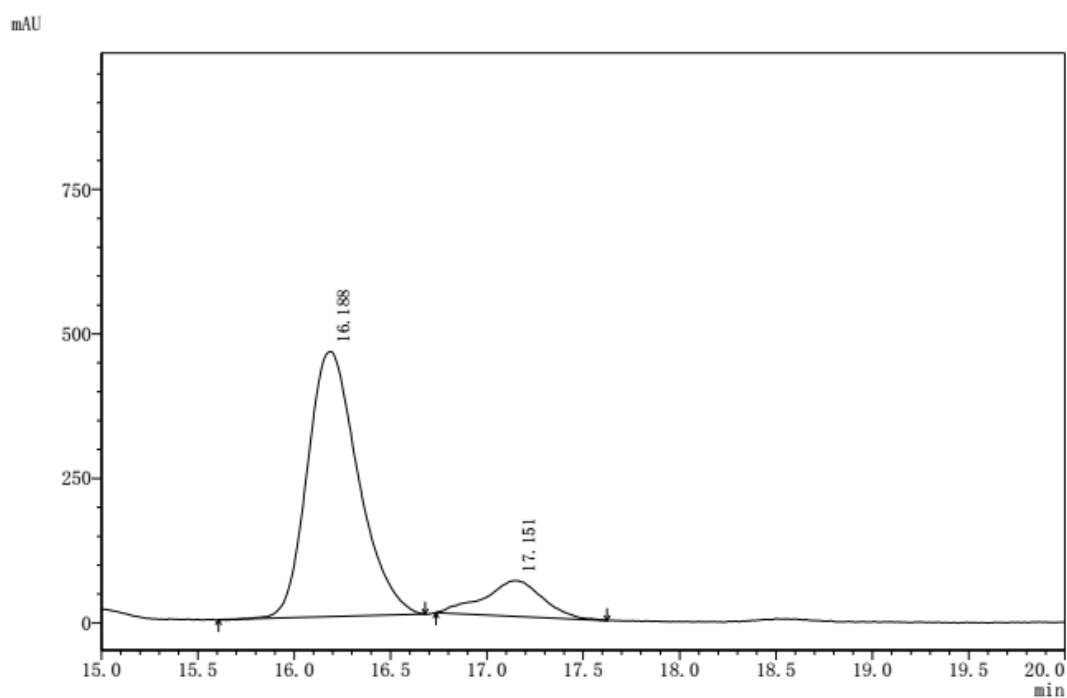

| Peak | RetTime | Area    | Height | Area%  |
|------|---------|---------|--------|--------|
| 1    | 16.188  | 8417229 | 458433 | 86.527 |
| 2    | 17.151  | 1310678 | 61727  | 13.473 |

### HPLC spectra of *racemic-3ap*

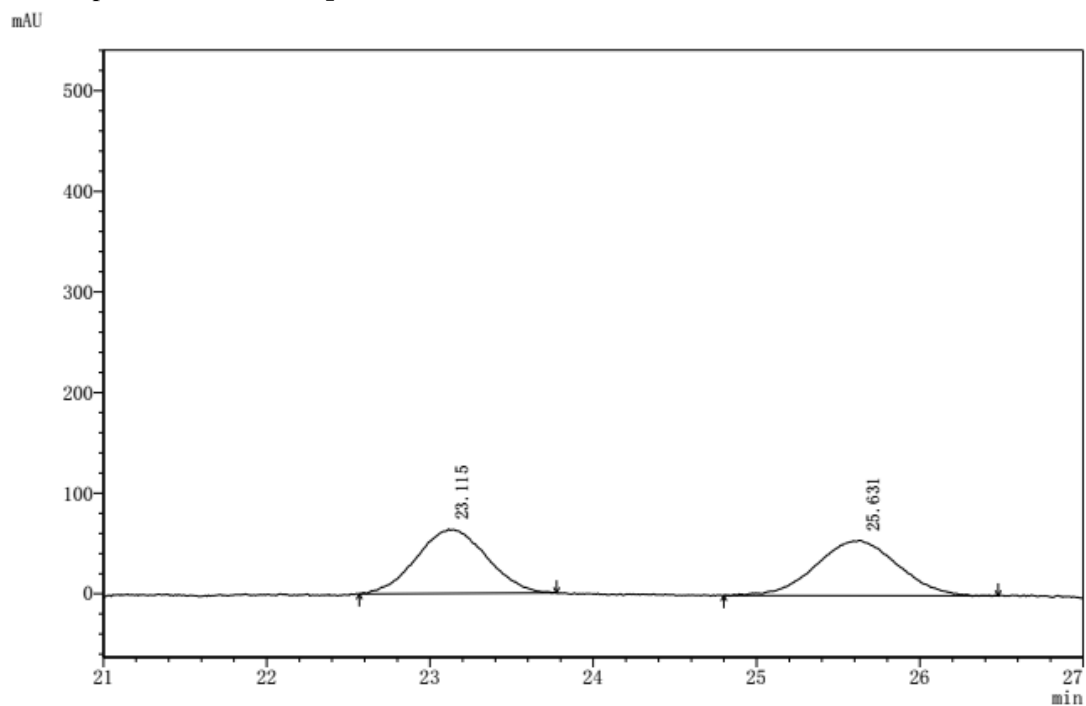

| Peak | RetTime | Area    | Height | Area%  |
|------|---------|---------|--------|--------|
| 1    | 23.115  | 1901958 | 63392  | 50.111 |
| 2    | 25.631  | 1893568 | 54817  | 49.889 |

### HPLC spectra of *enantioenriched-3ap*

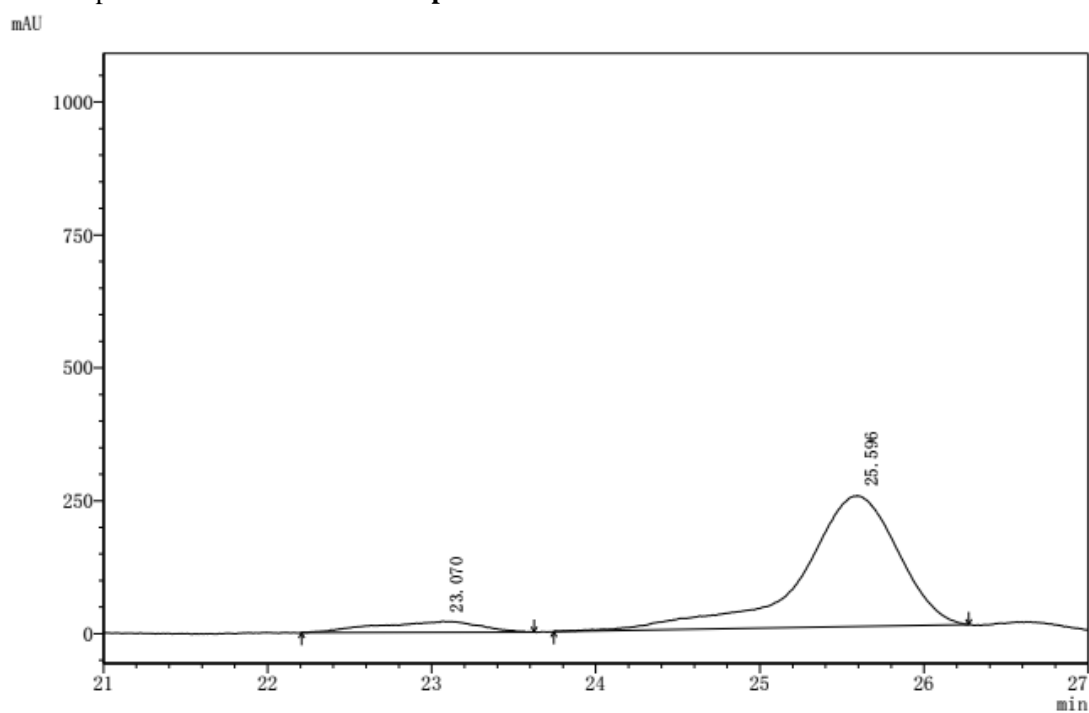

| Peak | RetTime | Area     | Height | Area%  |
|------|---------|----------|--------|--------|
| 1    | 23.070  | 875503   | 20572  | 8.038  |
| 2    | 25.596  | 10016722 | 245825 | 91.962 |

### HPLC spectra of *racemic-4ap*

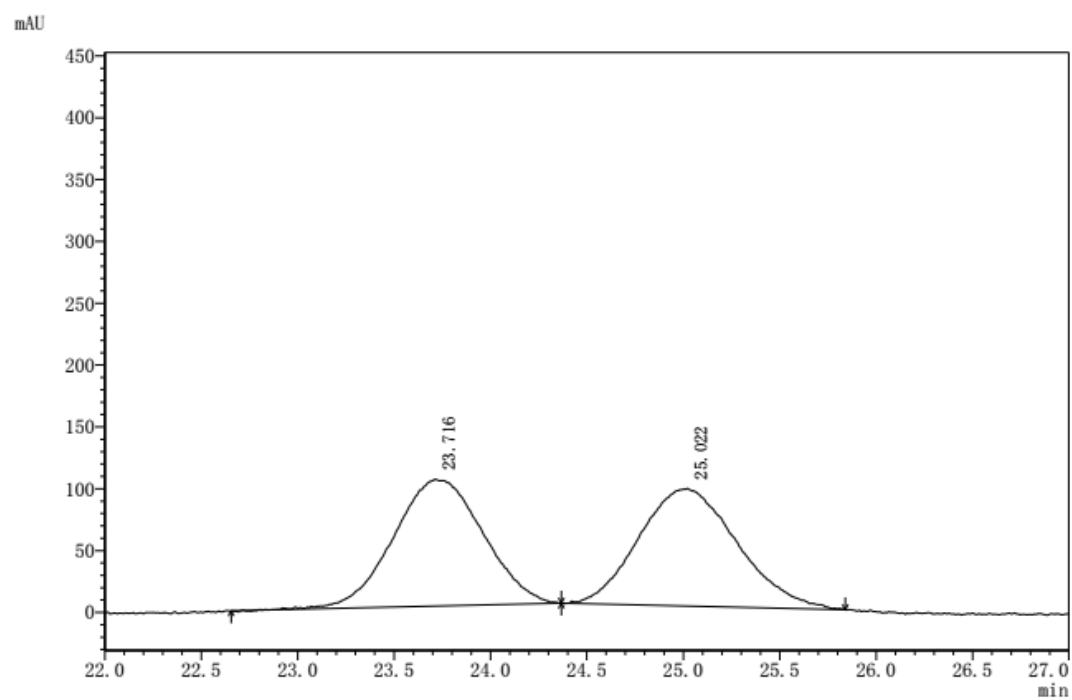

| Peak | RetTime | Area    | Height | Area%  |
|------|---------|---------|--------|--------|
| 1    | 23.716  | 3315920 | 102425 | 49.673 |
| 2    | 25.022  | 3359638 | 95050  | 50.327 |

### HPLC spectra of *enantioenriched-4ap*

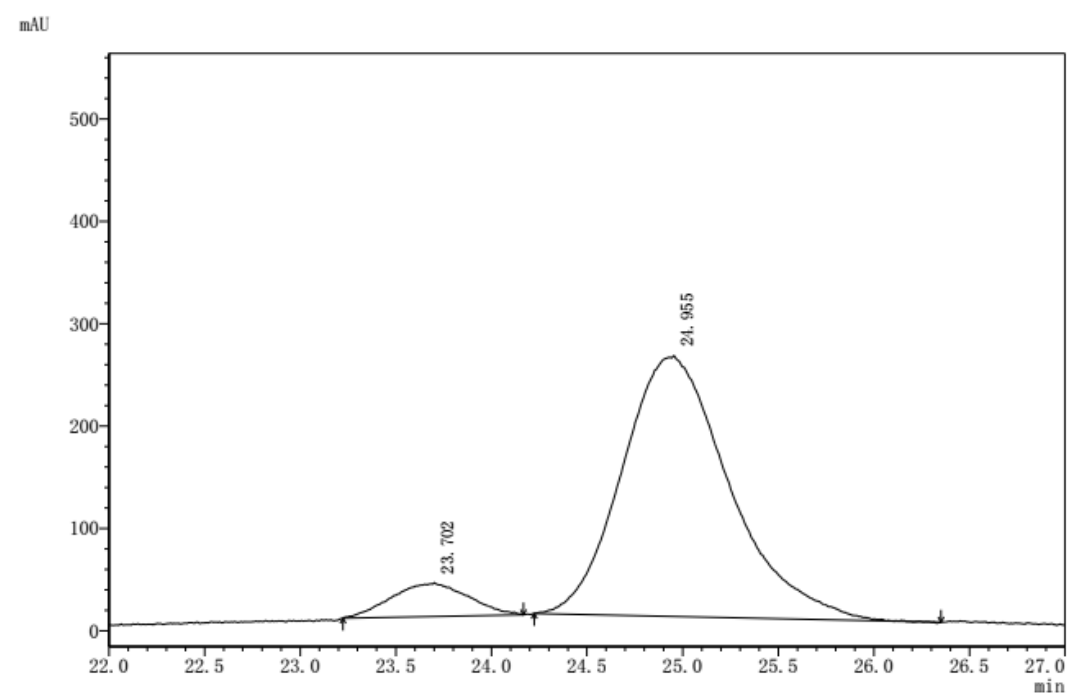

| Peak | RetTime | Area    | Height | Area%  |
|------|---------|---------|--------|--------|
| 1    | 23.702  | 911601  | 32917  | 8.429  |
| 2    | 24.955  | 9904091 | 254457 | 91.571 |

### HPLC spectra of *racemic-3aq*

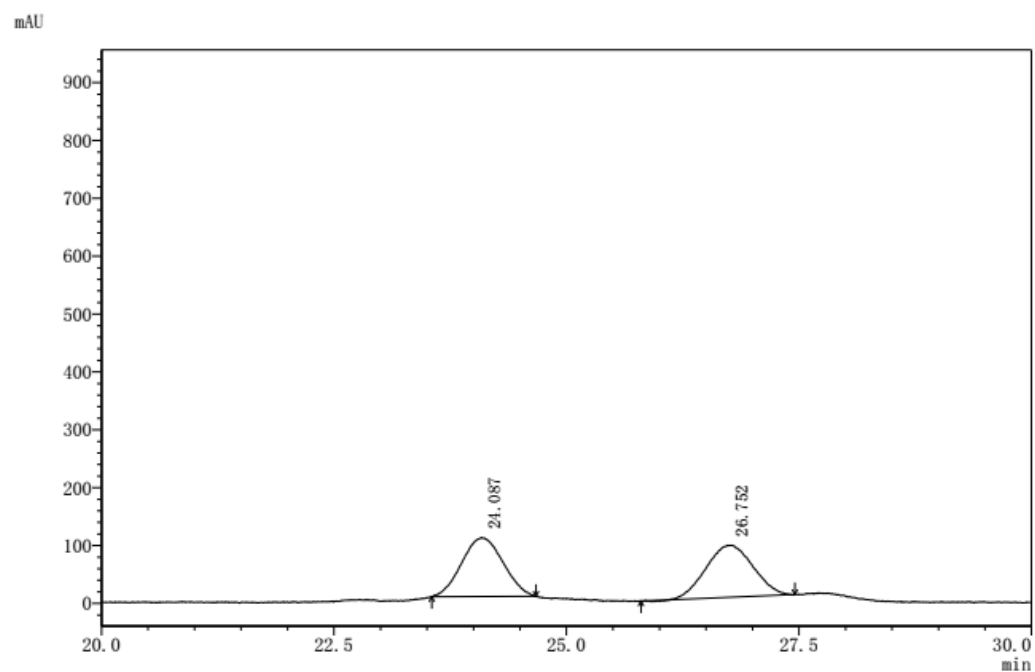

| Peak | RetTime | Area    | Height | Area%  |
|------|---------|---------|--------|--------|
| 1    | 24.087  | 3146238 | 101730 | 49.931 |
| 2    | 26.752  | 3154940 | 89731  | 50.069 |

### HPLC spectra of *enantioenriched-3aq*

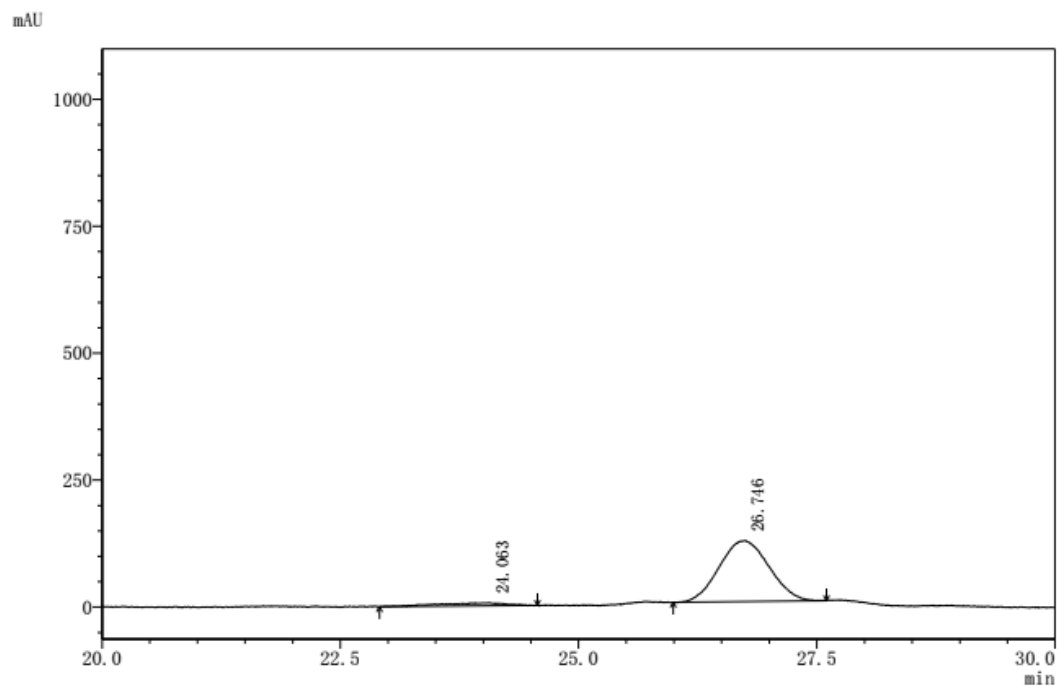

| Peak | RetTime | Area    | Height | Area%  |
|------|---------|---------|--------|--------|
| 1    | 24.063  | 284881  | 5913   | 6.146  |
| 2    | 26.746  | 4350142 | 119745 | 93.854 |

HPLC spectra of *racemic-4aq*

mAU

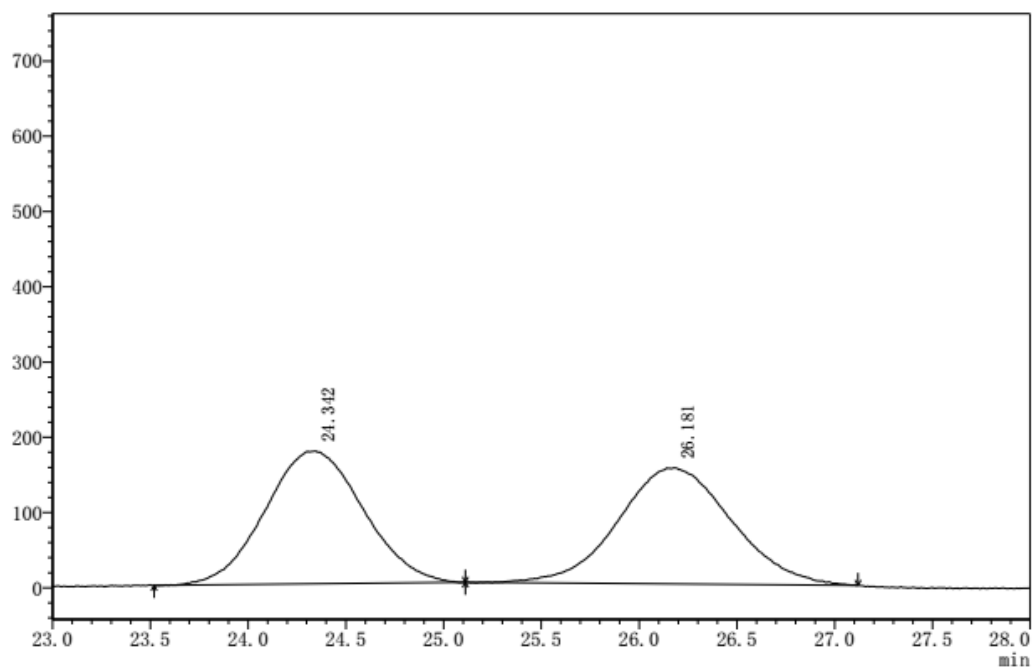

| Peak | RetTime | Area    | Height | Area%  |
|------|---------|---------|--------|--------|
| 1    | 24.342  | 6153328 | 176243 | 49.718 |
| 2    | 26.181  | 6223164 | 154358 | 50.282 |

HPLC spectra of *enantioenriched-4aq*

mAU

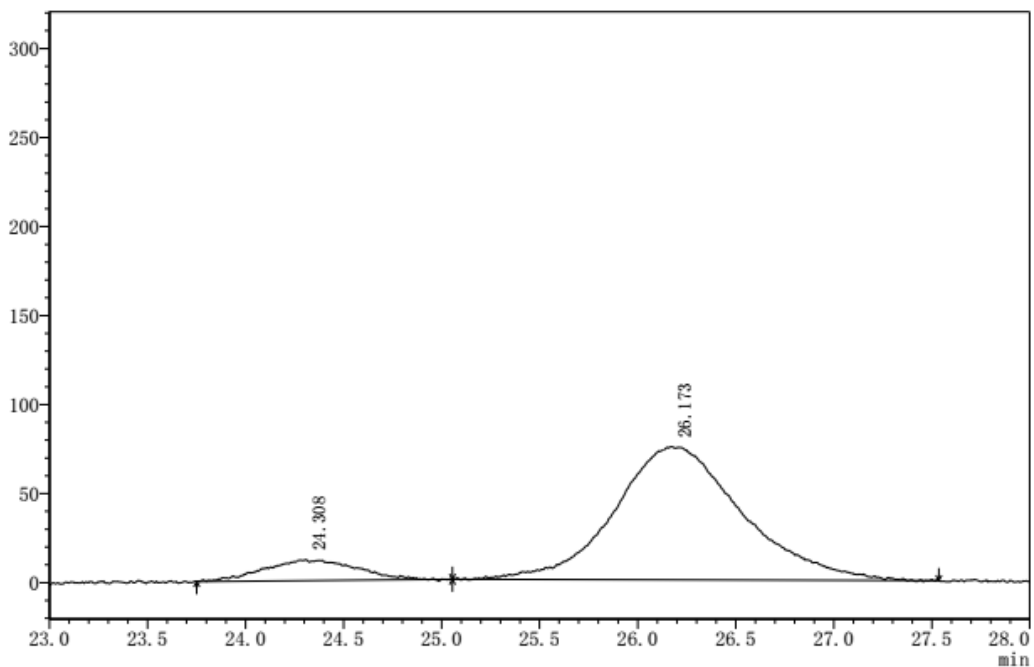

| Peak | RetTime | Area    | Height | Area%  |
|------|---------|---------|--------|--------|
| 1    | 24.308  | 378303  | 11690  | 10.063 |
| 2    | 26.173  | 3381166 | 74738  | 89.937 |



### HPLC spectra of *racemic-3ar*

mAU

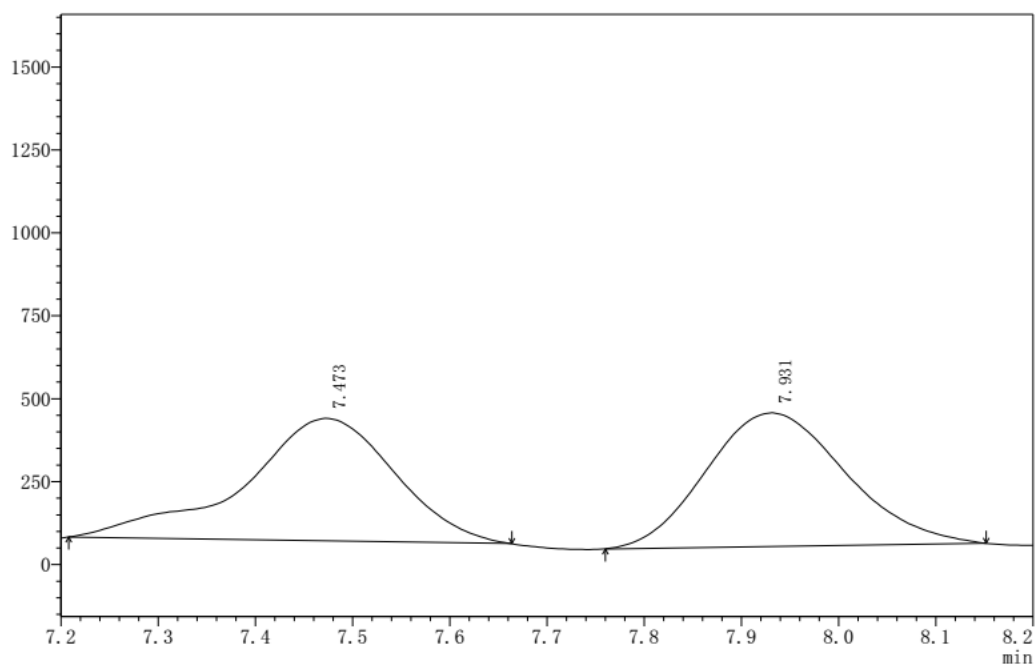

| Peak | RetTime | Area    | Height | Area%  |
|------|---------|---------|--------|--------|
| 1    | 7.473   | 3988044 | 368632 | 49.864 |
| 2    | 7.931   | 4009819 | 402107 | 50.136 |

### HPLC spectra of *enantioenriched-3ar*

mAU

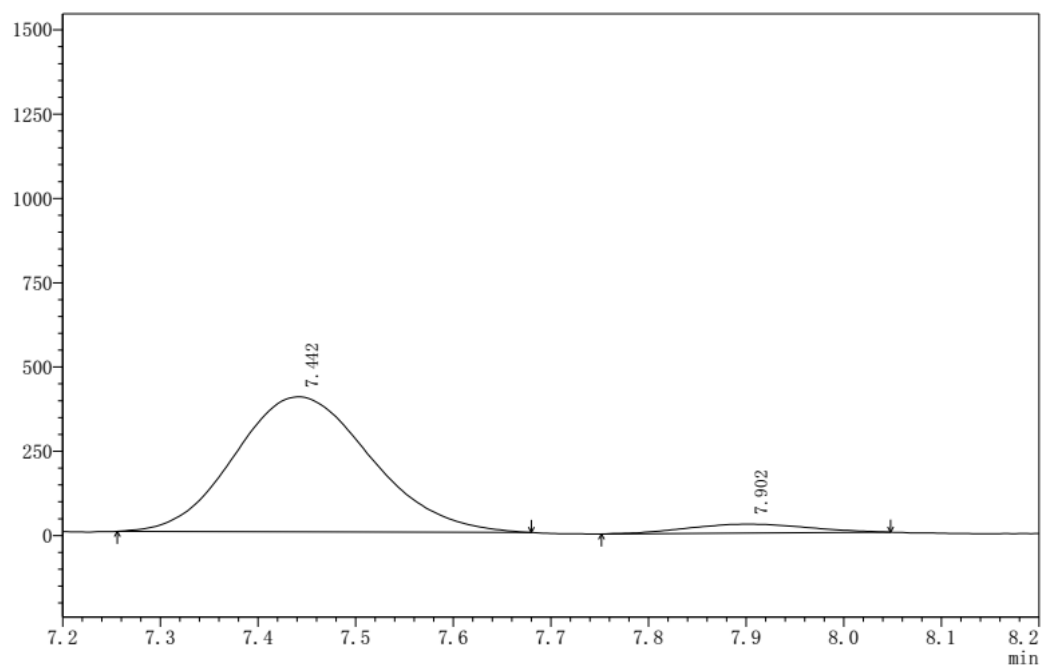

| Peak | RetTime | Area    | Height | Area%  |
|------|---------|---------|--------|--------|
| 1    | 7.442   | 3903699 | 399721 | 94.513 |
| 2    | 7.902   | 226620  | 26347  | 5.487  |

HPLC spectra of *racemic-4ar*

mAU

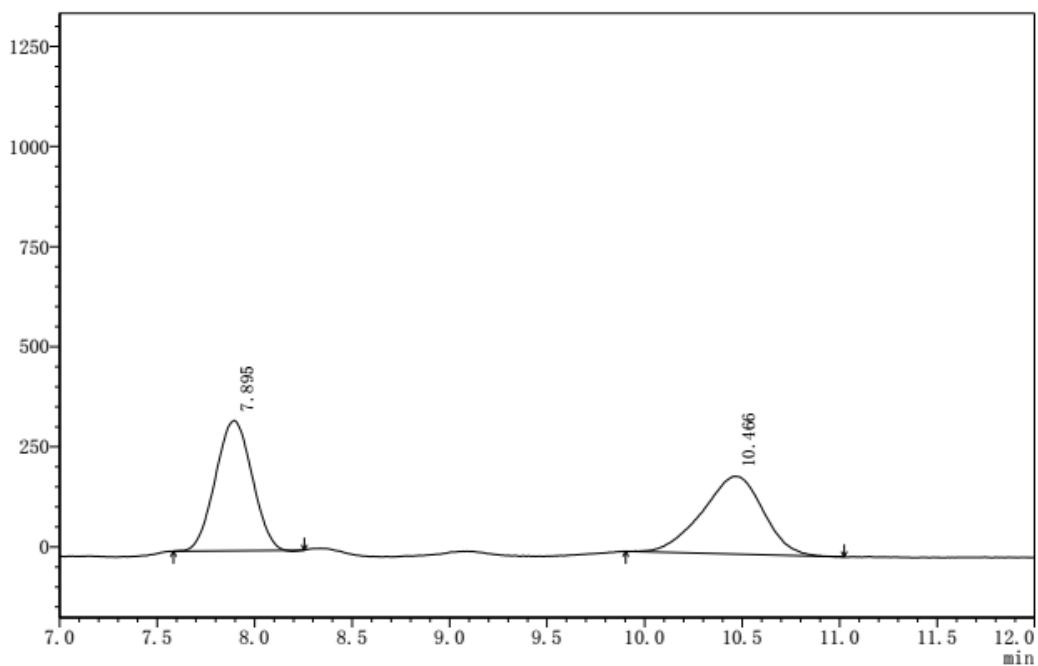

| Peak | RetTime | Area    | Height | Area%  |
|------|---------|---------|--------|--------|
| 1    | 7.895   | 4251379 | 324929 | 49.987 |
| 2    | 10.466  | 4253668 | 194130 | 50.013 |

HPLC spectra of *enantioenriched-4ar*

mAU

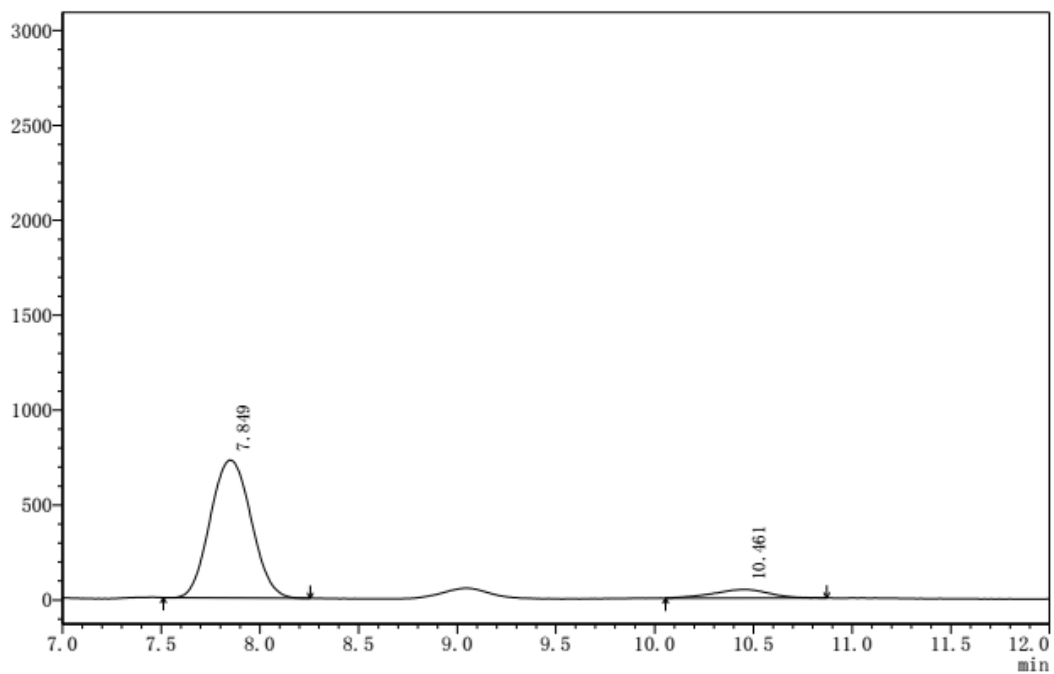

| Peak | RetTime | Area     | Height | Area%  |
|------|---------|----------|--------|--------|
| 1    | 7.849   | 10490401 | 725719 | 92.152 |
| 2    | 10.461  | 893422   | 44935  | 7.848  |

### HPLC spectra of *racemic-3as*

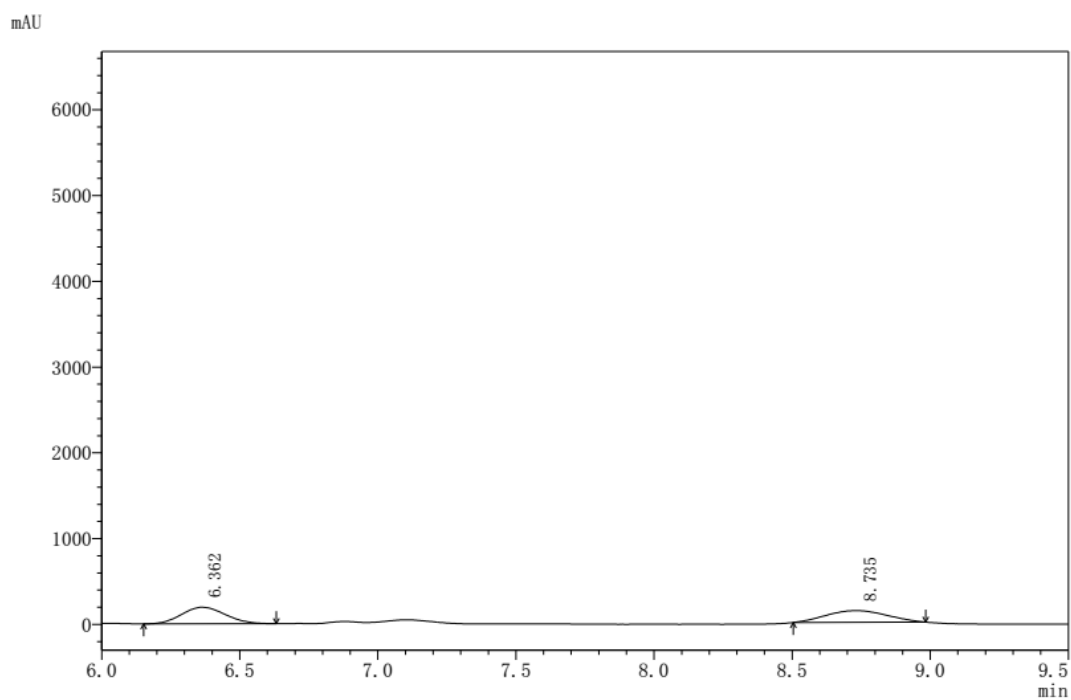

| Peak | RetTime | Area    | Height | Area%  |
|------|---------|---------|--------|--------|
| 1    | 6.362   | 2119135 | 192101 | 50.340 |
| 2    | 8.735   | 2090492 | 136066 | 49.660 |

### HPLC spectra of *enantioenriched-3as*

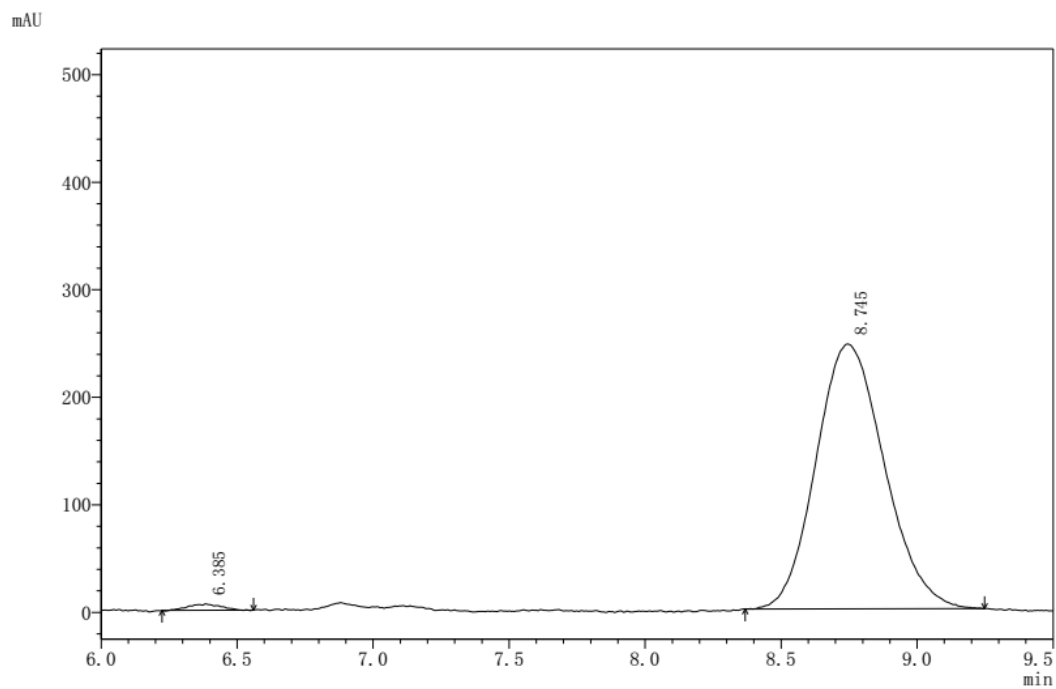

| Peak | RetTime | Area    | Height | Area%  |
|------|---------|---------|--------|--------|
| 1    | 6.385   | 48346   | 5880   | 1.110  |
| 2    | 8.745   | 4305490 | 246043 | 98.890 |

### HPLC spectra of *racemic-4as*

mAU

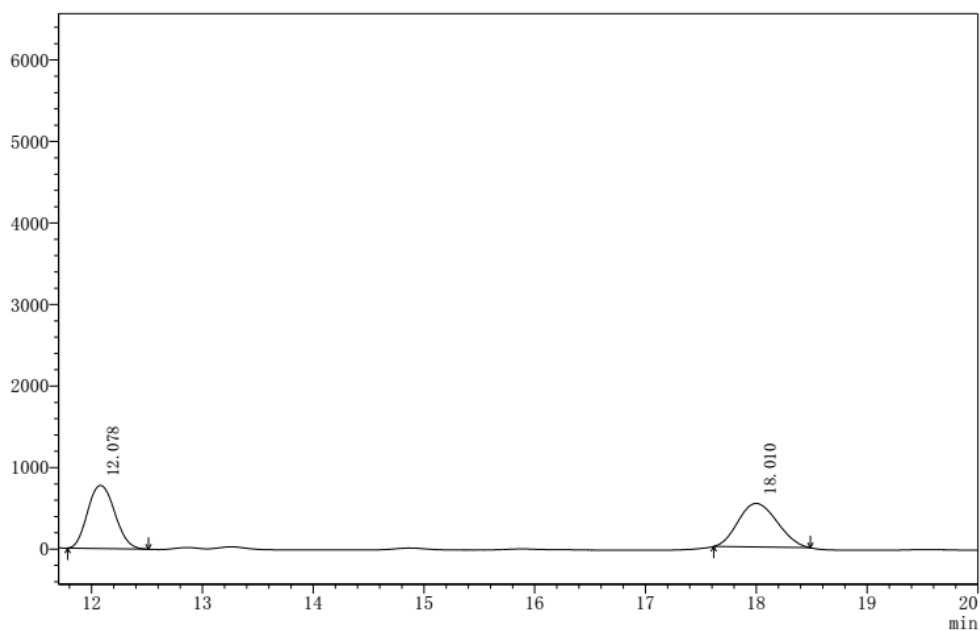

| Peak | RetTime | Area     | Height | Area%  |
|------|---------|----------|--------|--------|
| 1    | 12.078  | 13245721 | 773793 | 50.166 |
| 2    | 18.010  | 13157941 | 533625 | 49.834 |

### HPLC spectra of *enantioenriched-4as*

mAU

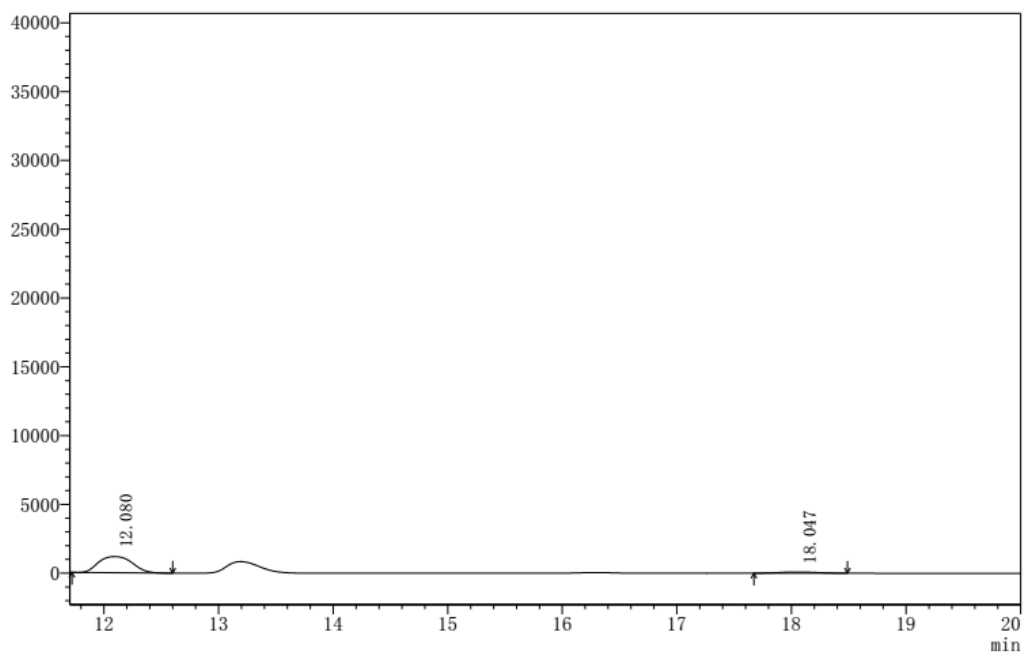

| Peak | RetTime | Area     | Height  | Area%  |
|------|---------|----------|---------|--------|
| 1    | 12.080  | 23897377 | 1169605 | 92.369 |
| 2    | 18.047  | 1974176  | 87105   | 7.631  |

### HPLC spectra of *racemic-3at*

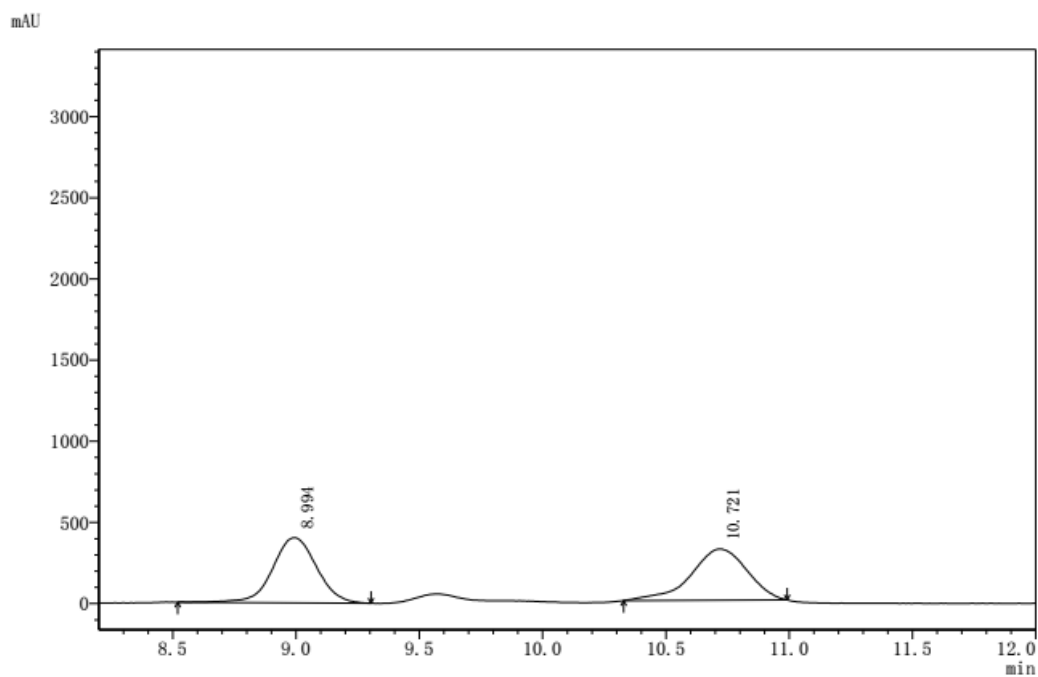

| Peak | RetTime | Area    | Height | Area%  |
|------|---------|---------|--------|--------|
| 1    | 8.994   | 4976445 | 401009 | 49.910 |
| 2    | 10.721  | 4994311 | 315020 | 50.090 |

### HPLC spectra of *enantioenriched-3at*

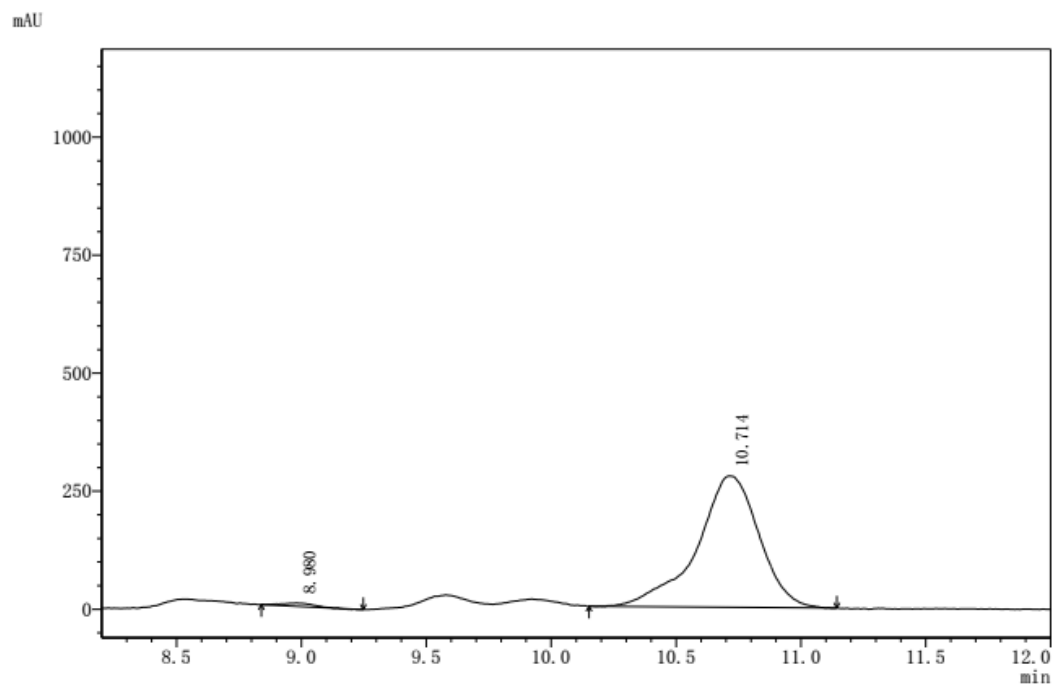

| Peak | RetTime | Area    | Height | Area%  |
|------|---------|---------|--------|--------|
| 1    | 8.980   | 57494   | 6788   | 1.180  |
| 2    | 10.714  | 4814394 | 277980 | 98.820 |

### HPLC spectra of *racemic-4at*

mAU

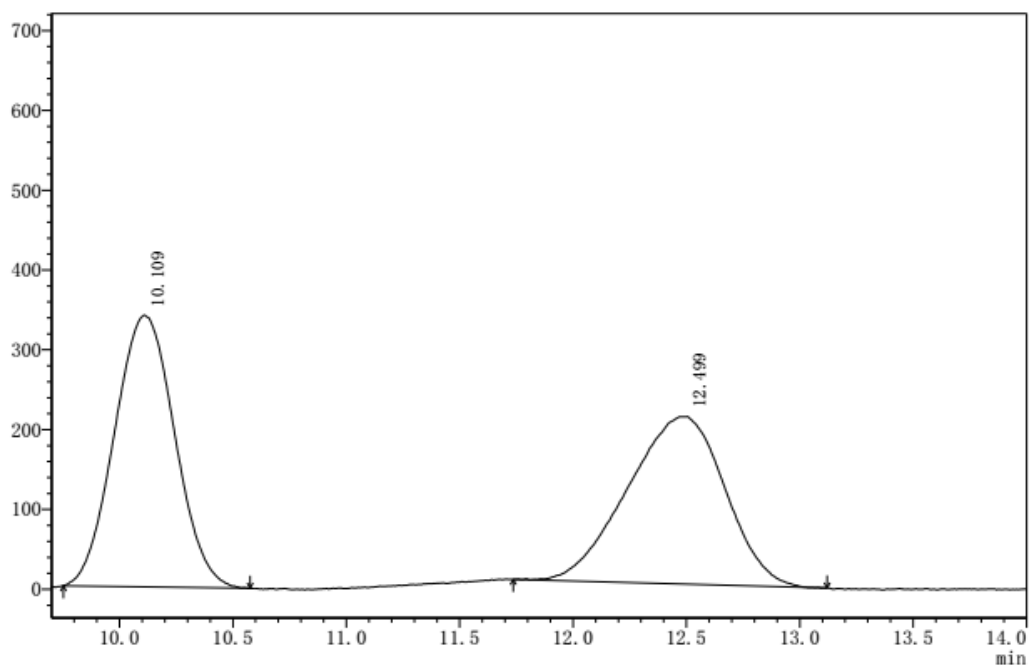

| Peak | RetTime | Area    | Height | Area%  |
|------|---------|---------|--------|--------|
| 1    | 10.109  | 6297241 | 340229 | 50.167 |
| 2    | 12.499  | 6255247 | 209743 | 49.833 |

### HPLC spectra of *enantioenriched-4at*

mAU

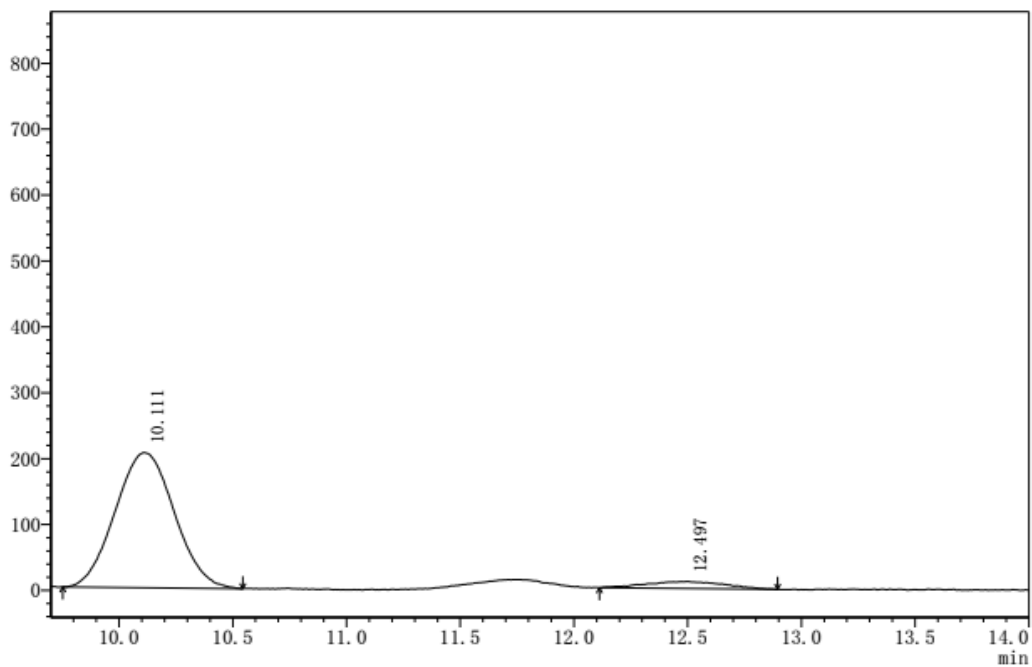

| Peak | RetTime | Area    | Height | Area%  |
|------|---------|---------|--------|--------|
| 1    | 10.111  | 3712907 | 205007 | 93.552 |
| 2    | 12.497  | 255892  | 10664  | 6.448  |

### HPLC spectra of *racemic-3au*

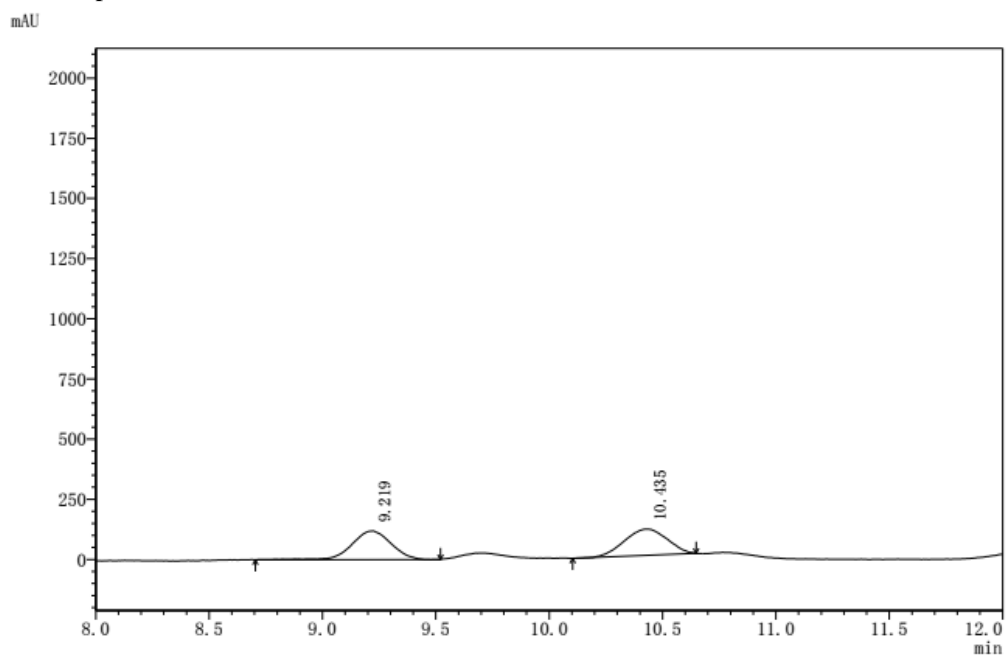

| Peak | RetTime | Area    | Height | Area%  |
|------|---------|---------|--------|--------|
| 1    | 9.219   | 1422814 | 118525 | 50.003 |
| 2    | 10.435  | 1422638 | 108392 | 49.997 |

### HPLC spectra of *enantioenriched-3au*

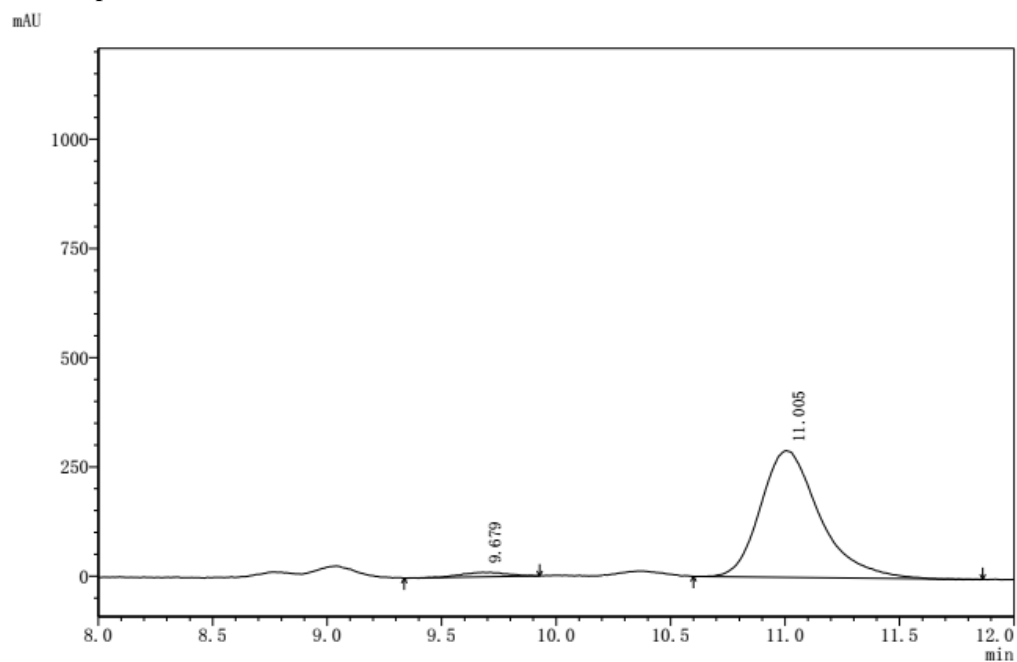

| Peak | RetTime | Area    | Height | Area%  |
|------|---------|---------|--------|--------|
| 1    | 9.679   | 141298  | 10334  | 2.642  |
| 2    | 11.005  | 5207154 | 289700 | 97.358 |

HPLC spectra of *racemic-4au*

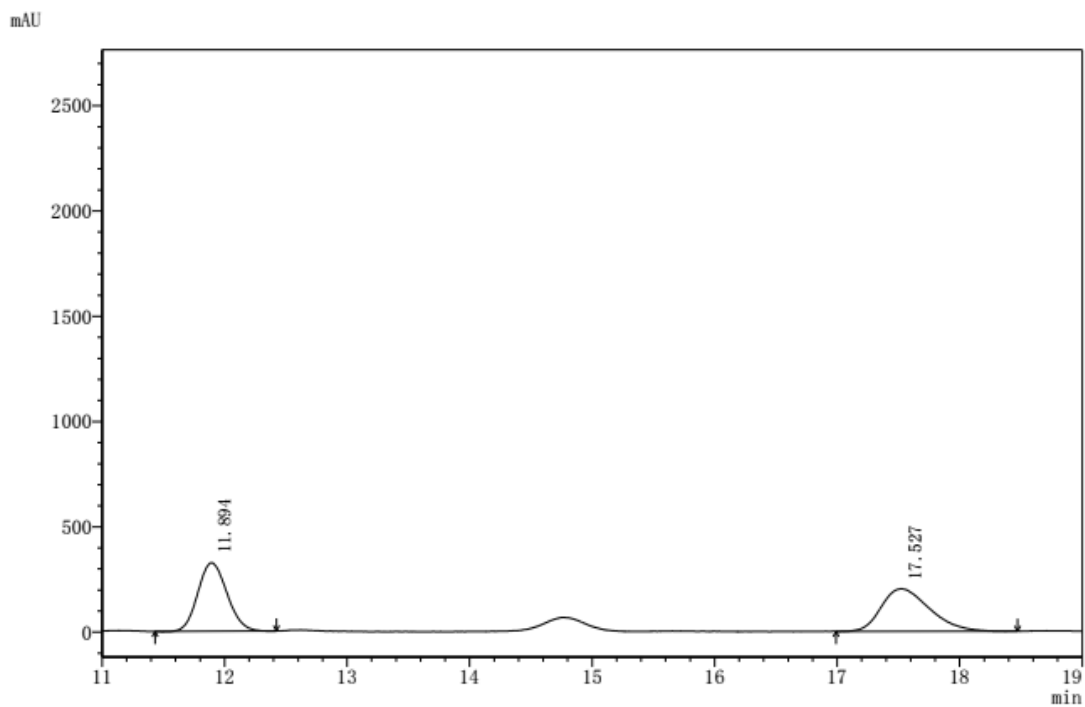

| Peak | RetTime | Area    | Height | Area%  |
|------|---------|---------|--------|--------|
| 1    | 11.894  | 5382312 | 324808 | 49.324 |
| 2    | 17.527  | 5529749 | 202160 | 50.676 |

HPLC spectra of *enantioenriched-4au*

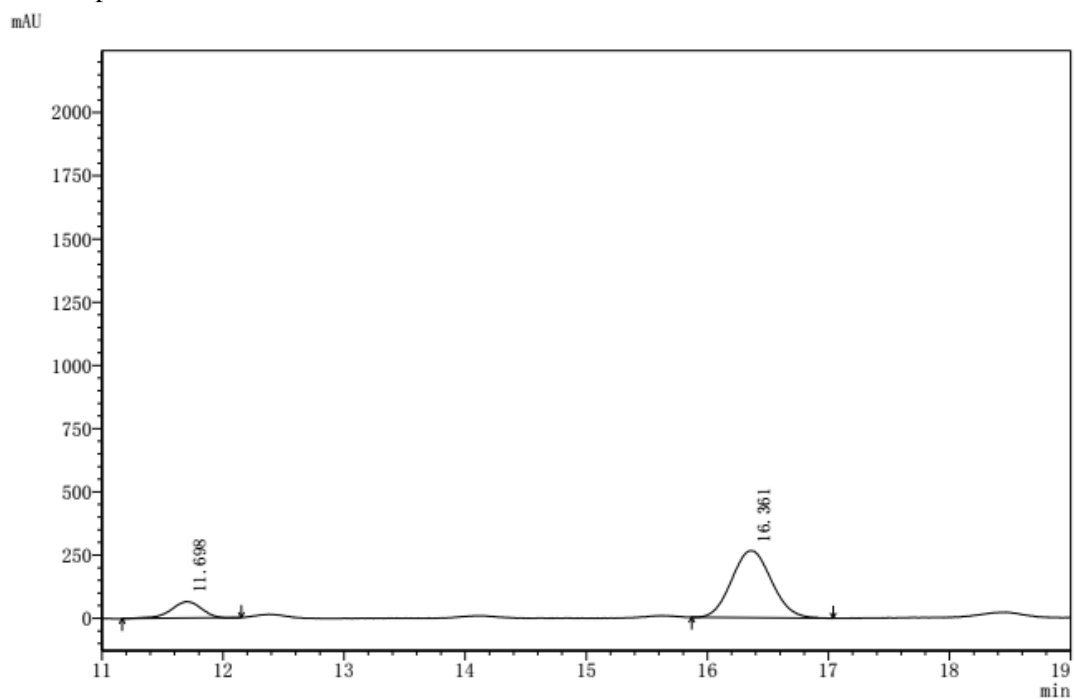

| Peak | RetTime | Area    | Height | Area%  |
|------|---------|---------|--------|--------|
| 1    | 11.698  | 1110786 | 64580  | 15.439 |
| 2    | 16.361  | 6084035 | 265106 | 84.561 |



### HPLC spectra of *racemic-3av*

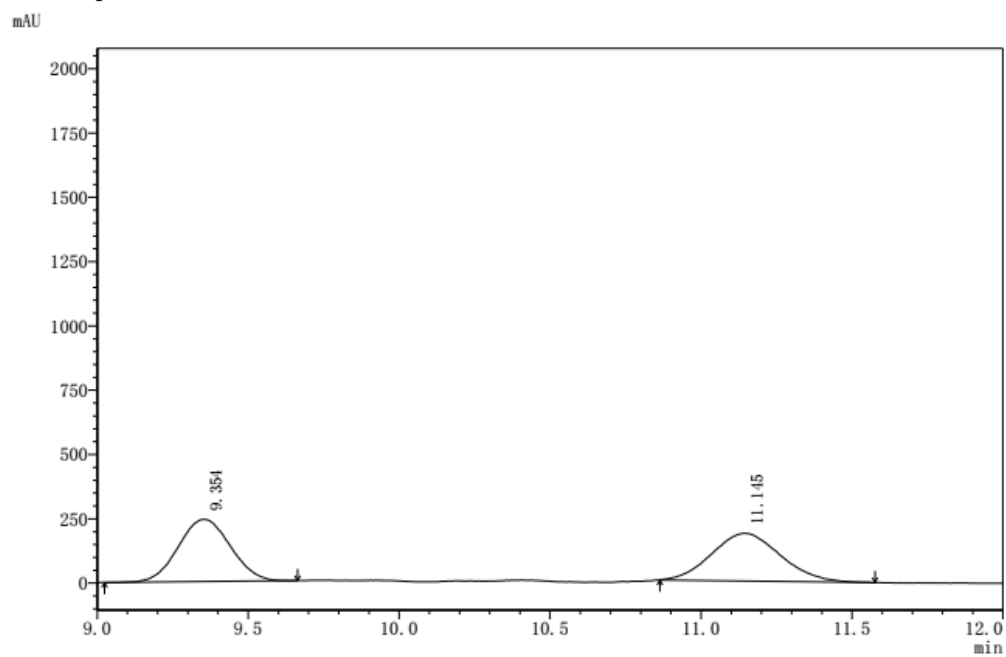

| Peak | RetTime | Area    | Height | Area%  |
|------|---------|---------|--------|--------|
| 1    | 9.354   | 2899099 | 241001 | 49.714 |
| 2    | 11.145  | 2932465 | 185332 | 50.286 |

### HPLC spectra of *enantioenriched-3av*

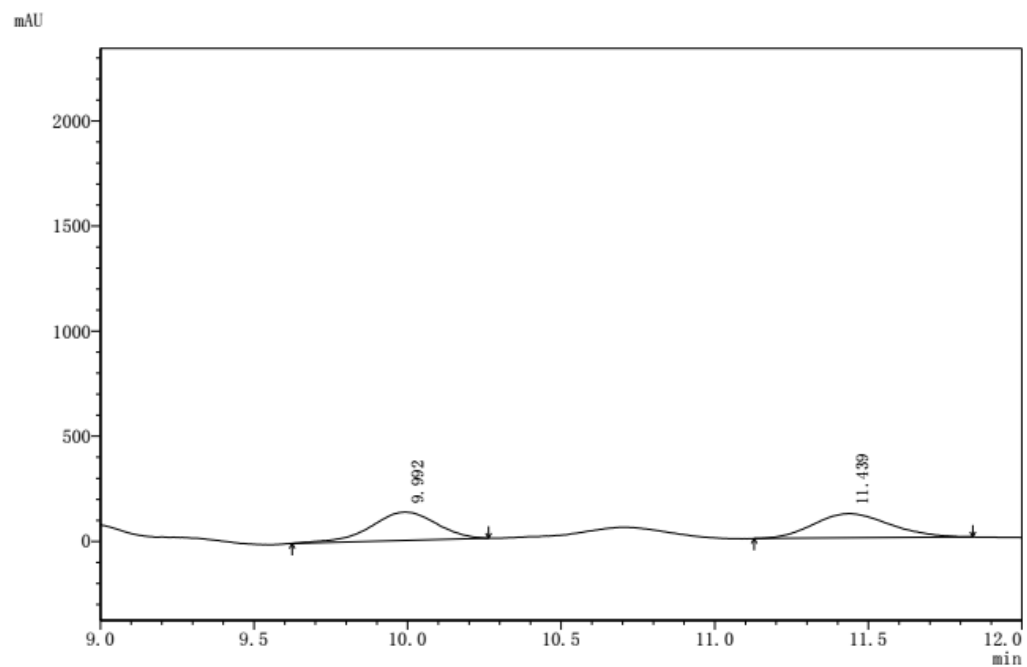

| Peak | RetTime | Area    | Height | Area%  |
|------|---------|---------|--------|--------|
| 1    | 9.992   | 1982734 | 134018 | 49.899 |
| 2    | 11.439  | 1990766 | 115110 | 50.101 |

HPLC spectra of *racemic-4av*

mAU

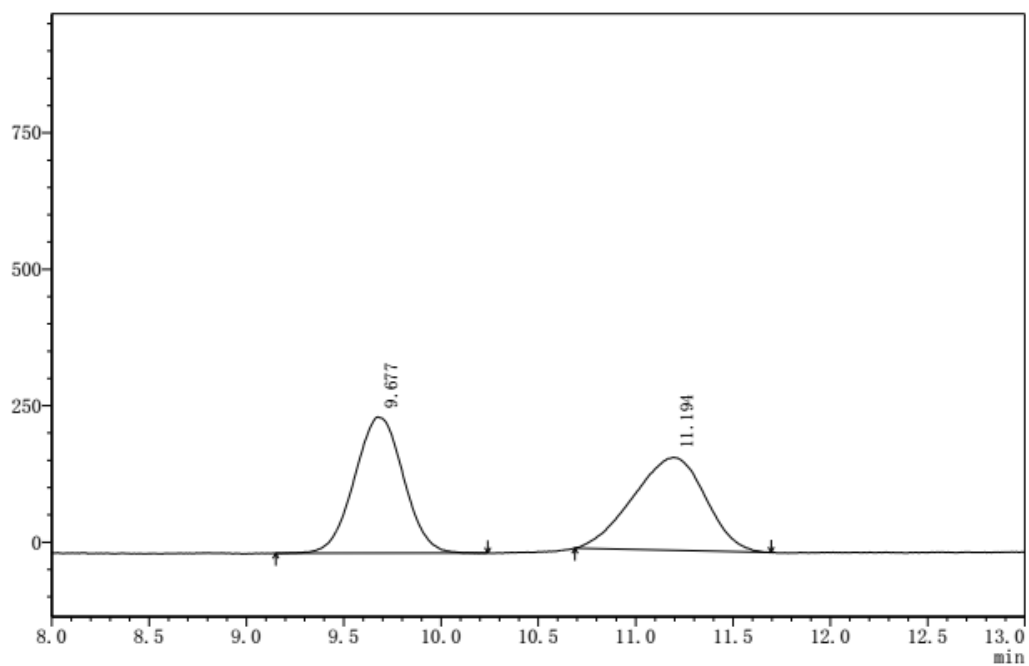

| Peak | RetTime | Area    | Height | Area%  |
|------|---------|---------|--------|--------|
| 1    | 9.677   | 4366479 | 249292 | 49.787 |
| 2    | 11.194  | 4403871 | 170100 | 50.213 |

HPLC spectra of *enantioenriched-4av*

mAU

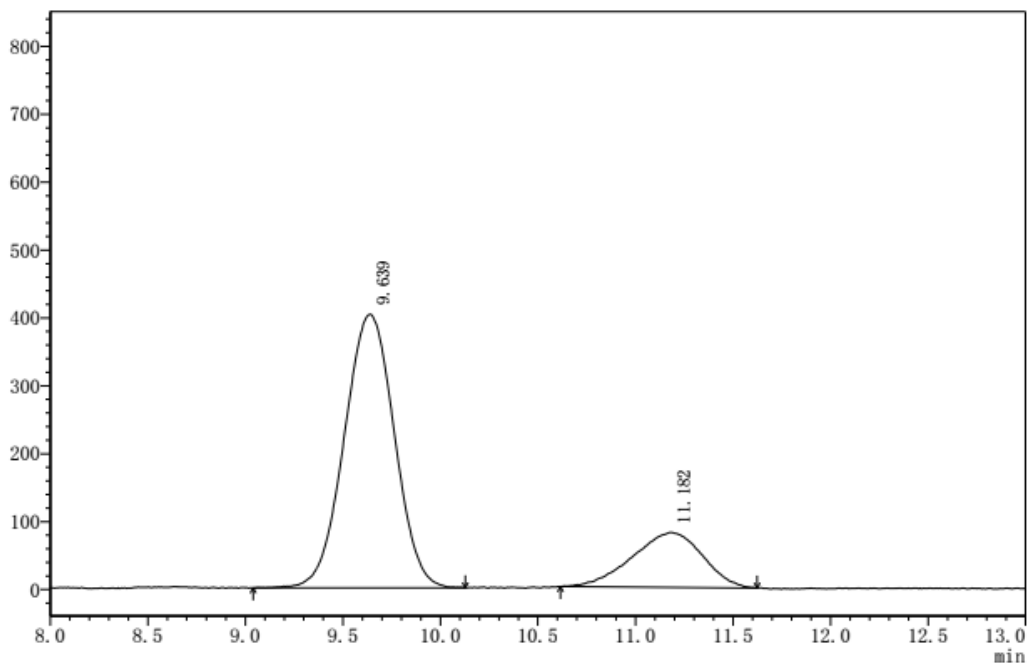

| Peak | RetTime | Area    | Height | Area%  |
|------|---------|---------|--------|--------|
| 1    | 9.639   | 7202632 | 402677 | 78.123 |
| 2    | 11.182  | 2017005 | 80878  | 21.877 |

### HPLC spectra of *racemic-3aw*

mAU

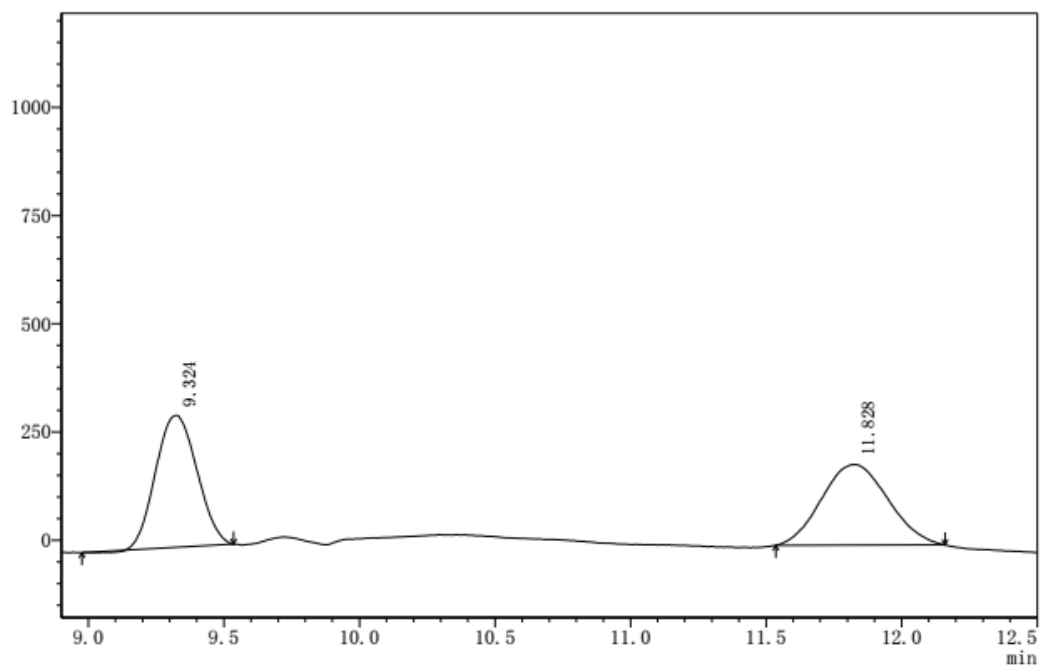

| Peak | RetTime | Area    | Height | Area%  |
|------|---------|---------|--------|--------|
| 1    | 9.324   | 3228431 | 304639 | 50.411 |
| 2    | 11.828  | 3175779 | 186047 | 49.589 |

### HPLC spectra of *enantioenriched-3aw*

mAU

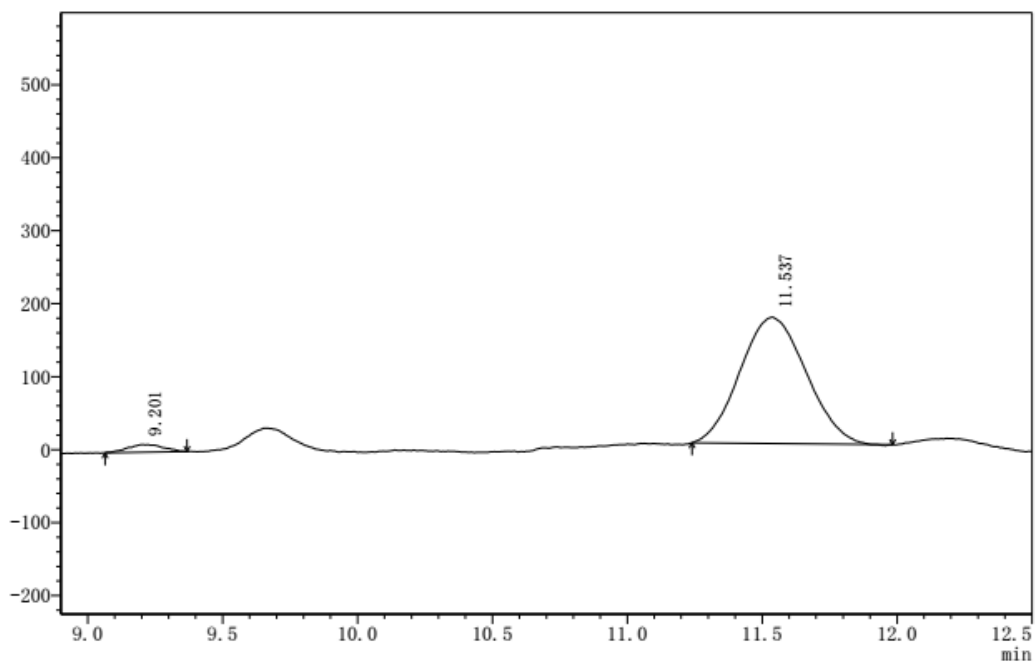

| Peak | RetTime | Area    | Height | Area%  |
|------|---------|---------|--------|--------|
| 1    | 9.201   | 96492   | 10469  | 3.170  |
| 2    | 11.537  | 2947648 | 172935 | 96.830 |

HPLC spectra of *racemic-4aw*

mAU

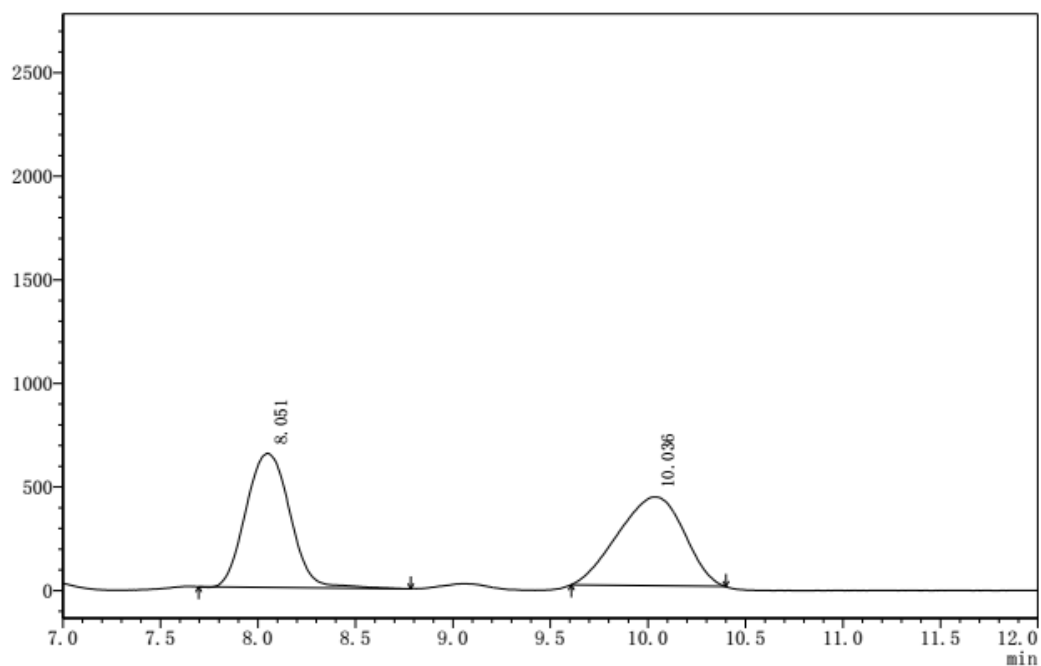

| Peak | RetTime | Area     | Height | Area%  |
|------|---------|----------|--------|--------|
| 1    | 8.051   | 10189434 | 646766 | 50.139 |
| 2    | 10.036  | 10133056 | 428489 | 49.861 |

HPLC spectra of *enantioenriched-4aw*

mAU

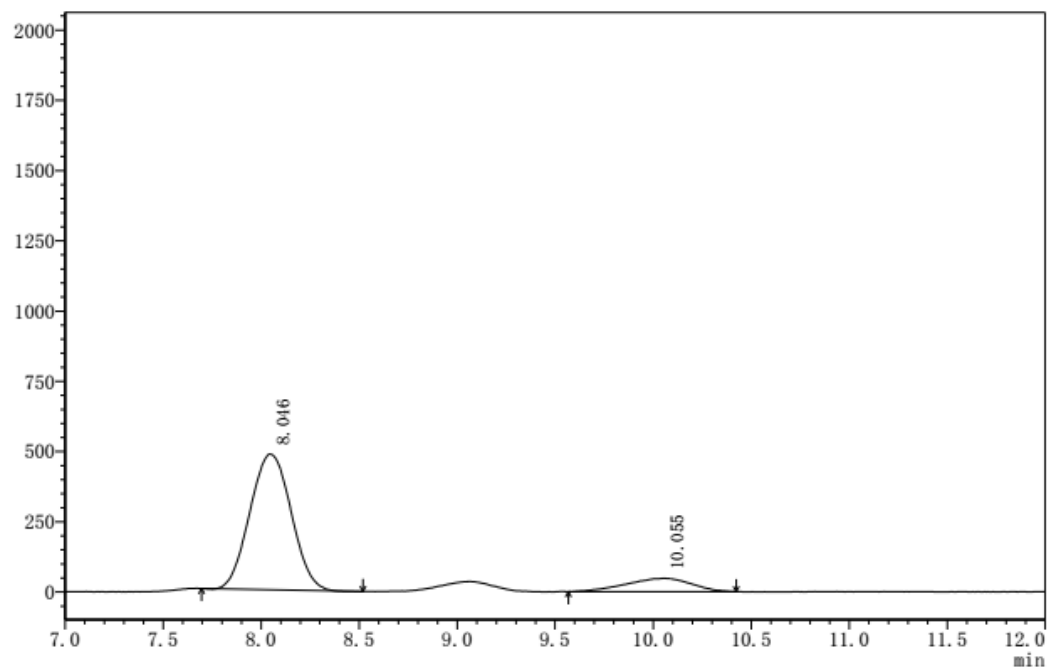

| Peak | RetTime | Area    | Height | Area%  |
|------|---------|---------|--------|--------|
| 1    | 8.046   | 7094113 | 482895 | 86.559 |
| 2    | 10.055  | 1101554 | 47664  | 13.441 |

### HPLC spectra of *racemic-3ax*

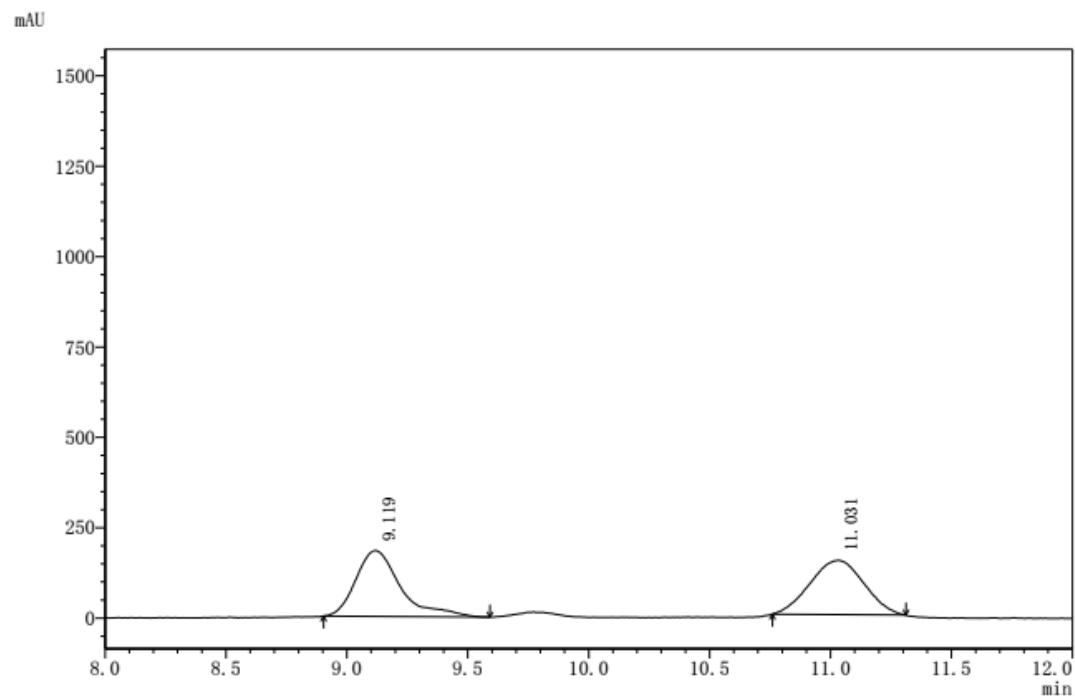

| Peak | RetTime | Area    | Height | Area%  |
|------|---------|---------|--------|--------|
| 1    | 9.119   | 2329158 | 182350 | 49.985 |
| 2    | 11.031  | 2330553 | 150190 | 50.015 |

### HPLC spectra of *enantioenriched-3ax*

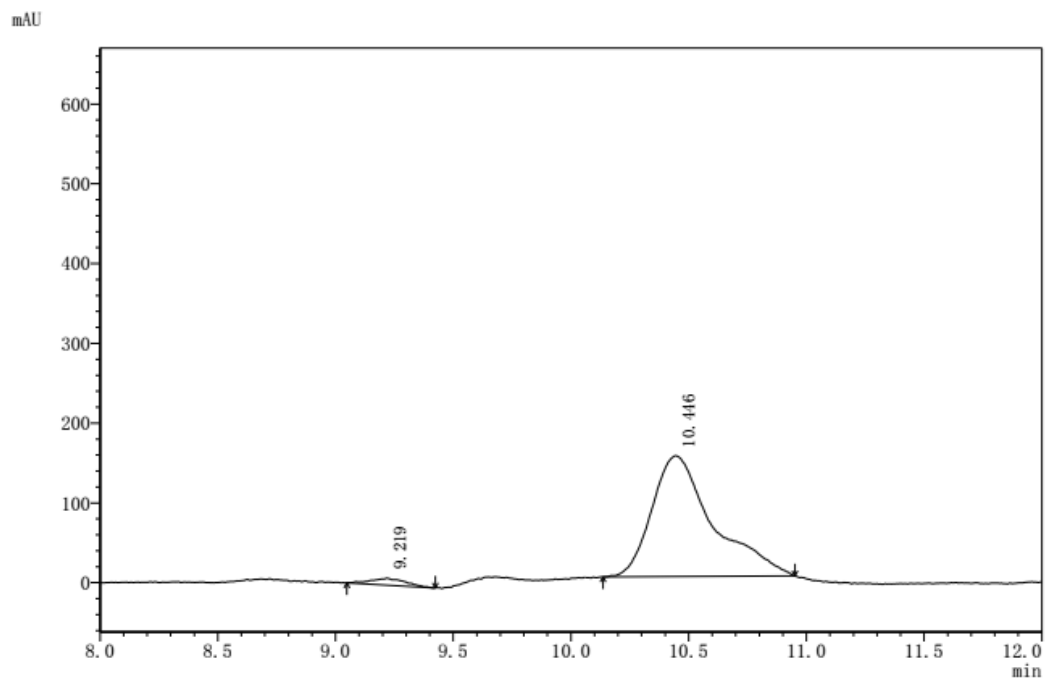

| Peak | RetTime | Area    | Height | Area%  |
|------|---------|---------|--------|--------|
| 1    | 9.219   | 85798   | 8455   | 3.057  |
| 2    | 10.446  | 2720731 | 151314 | 96.943 |

HPLC spectra of *racemic-4ax*

mAU

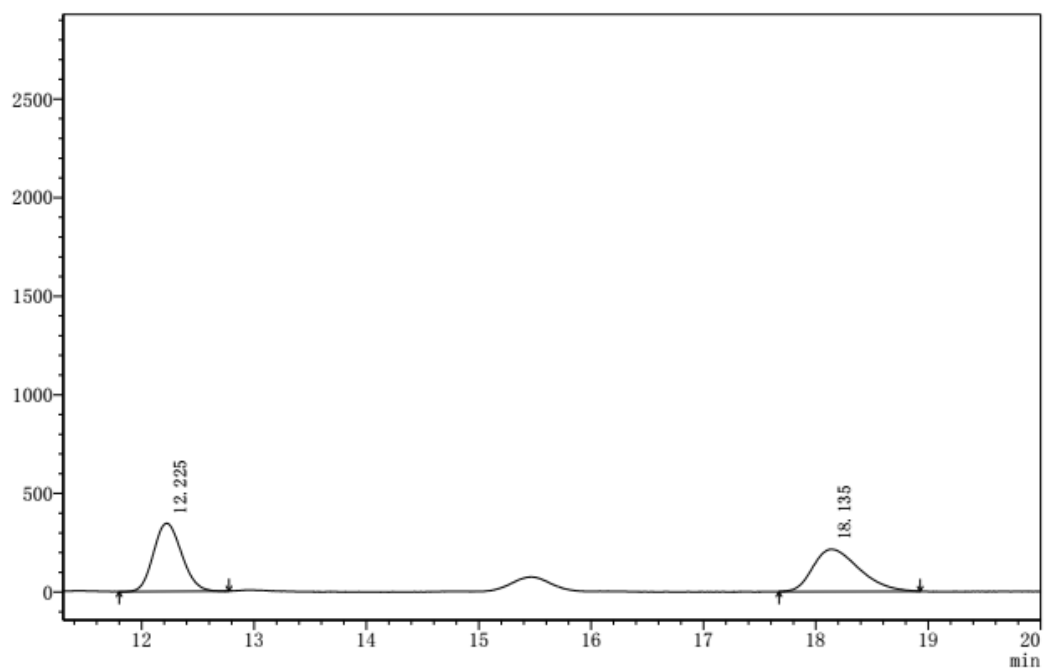

| Peak | RetTime | Area    | Height | Area%  |
|------|---------|---------|--------|--------|
| 1    | 12.225  | 6044255 | 345405 | 49.683 |
| 2    | 18.135  | 6121505 | 214040 | 50.317 |

HPLC spectra of *enantioenriched-4ax*

mAU

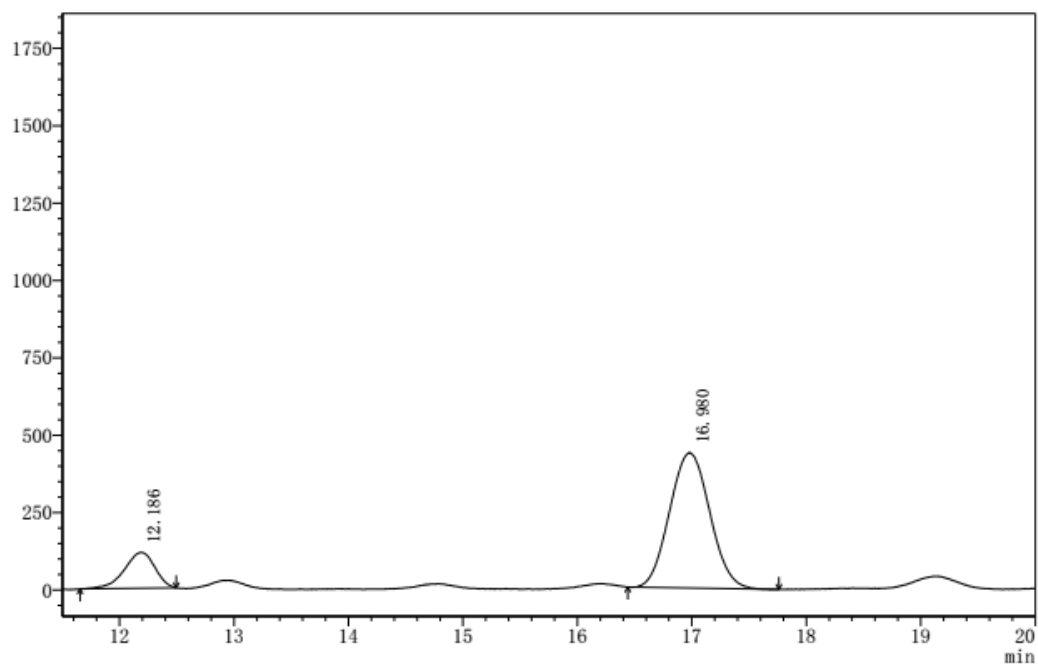

| Peak | RetTime | Area     | Height | Area%  |
|------|---------|----------|--------|--------|
| 1    | 12.186  | 2142053  | 115444 | 16.678 |
| 2    | 16.980  | 10701362 | 437353 | 83.322 |

### HPLC spectra of *racemic-3ay*

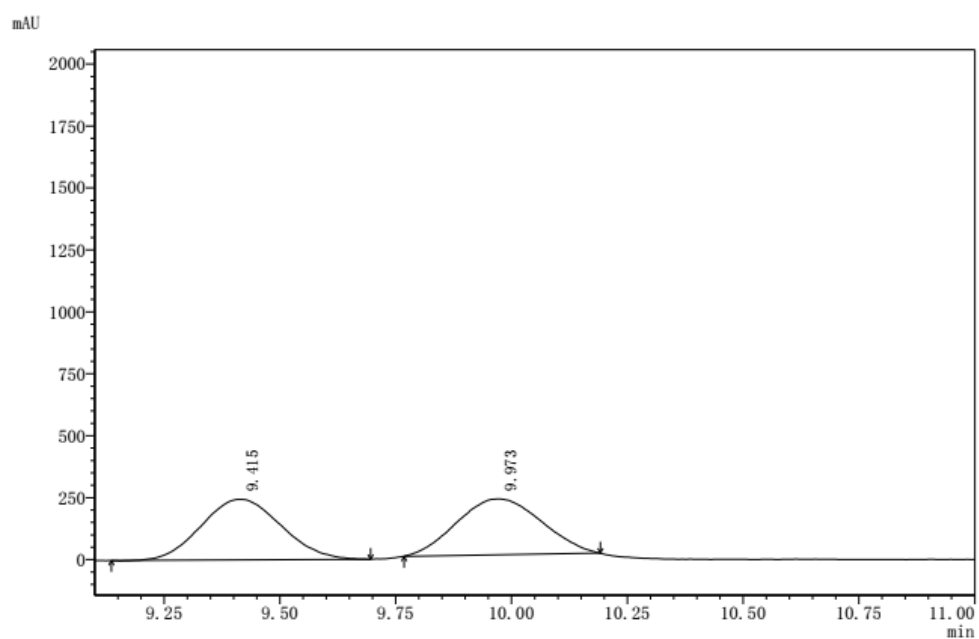

| Peak | RetTime | Area    | Height | Area%  |
|------|---------|---------|--------|--------|
| 1    | 9.415   | 2925171 | 244061 | 50.498 |
| 2    | 9.973   | 2867461 | 225272 | 49.502 |

### HPLC spectra of *enantioenriched-3ay*

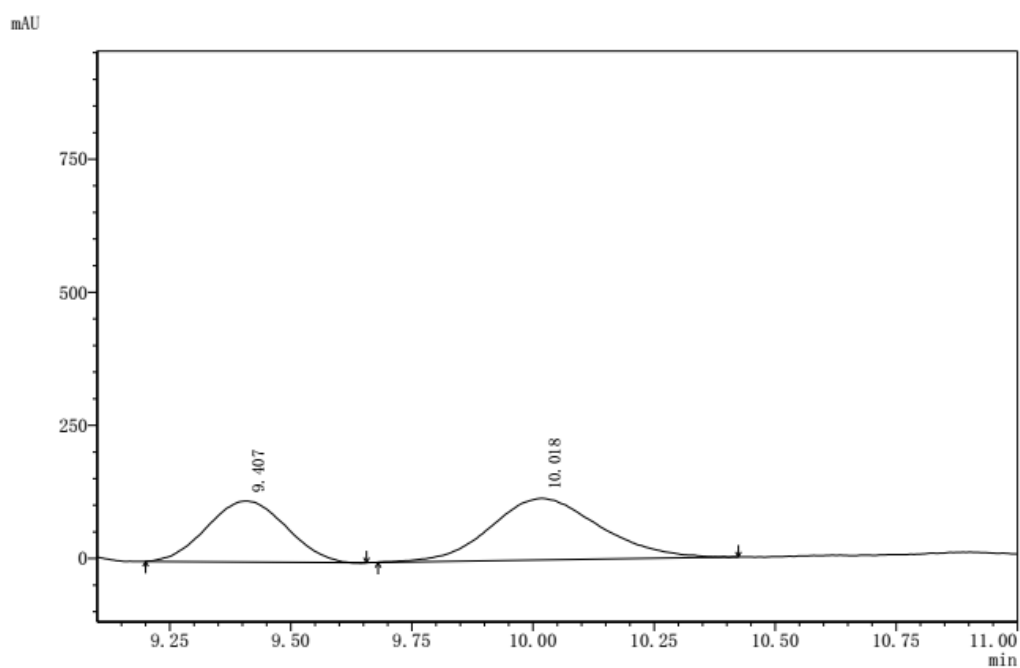

| Peak | RetTime | Area    | Height | Area%  |
|------|---------|---------|--------|--------|
| 1    | 9.407   | 1302862 | 114699 | 41.833 |
| 2    | 10.018  | 1811591 | 115605 | 58.167 |

HPLC spectra of *racemic-4ay*

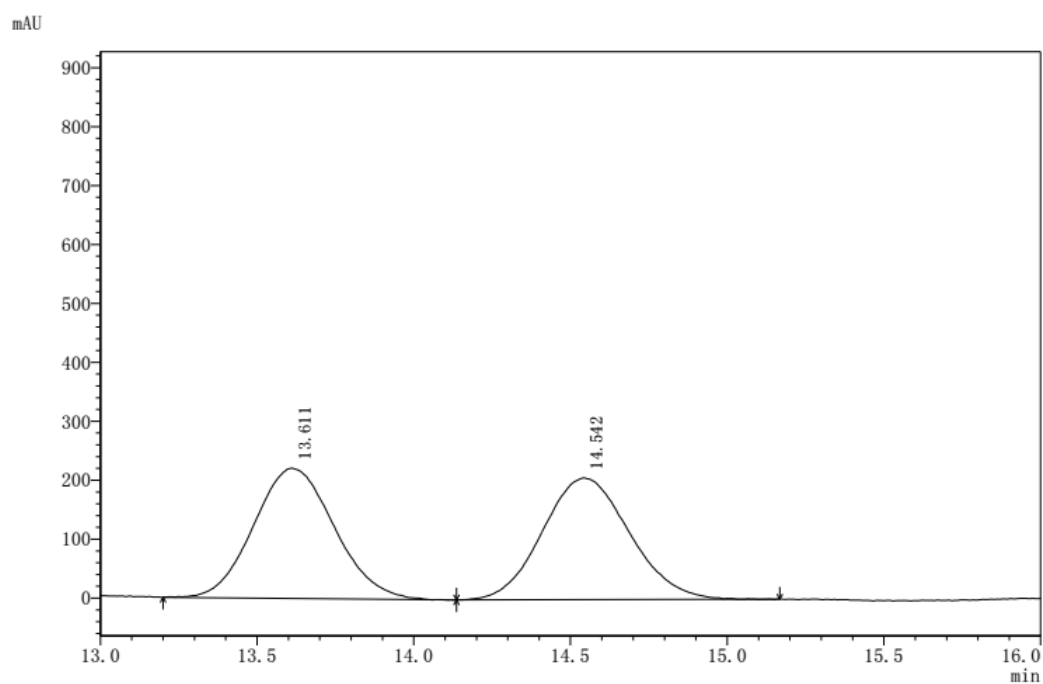

| Peak | RetTime | Area    | Height | Area%  |
|------|---------|---------|--------|--------|
| 1    | 13.611  | 3956267 | 220785 | 49.795 |
| 2    | 14.542  | 3988830 | 206546 | 50.205 |

HPLC spectra of *enantioenriched-4ay*

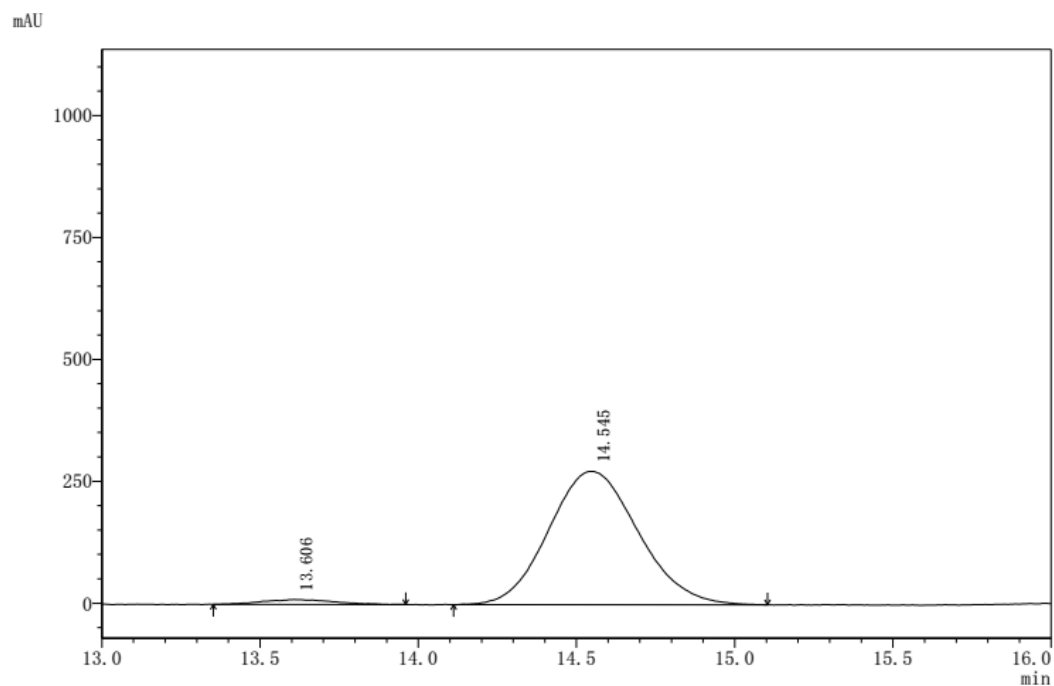

| Peak | RetTime | Area    | Height | Area%  |
|------|---------|---------|--------|--------|
| 1    | 13.606  | 157672  | 10162  | 2.842  |
| 2    | 14.545  | 5391070 | 273248 | 97.158 |



HPLC spectra of *racemic-3az*

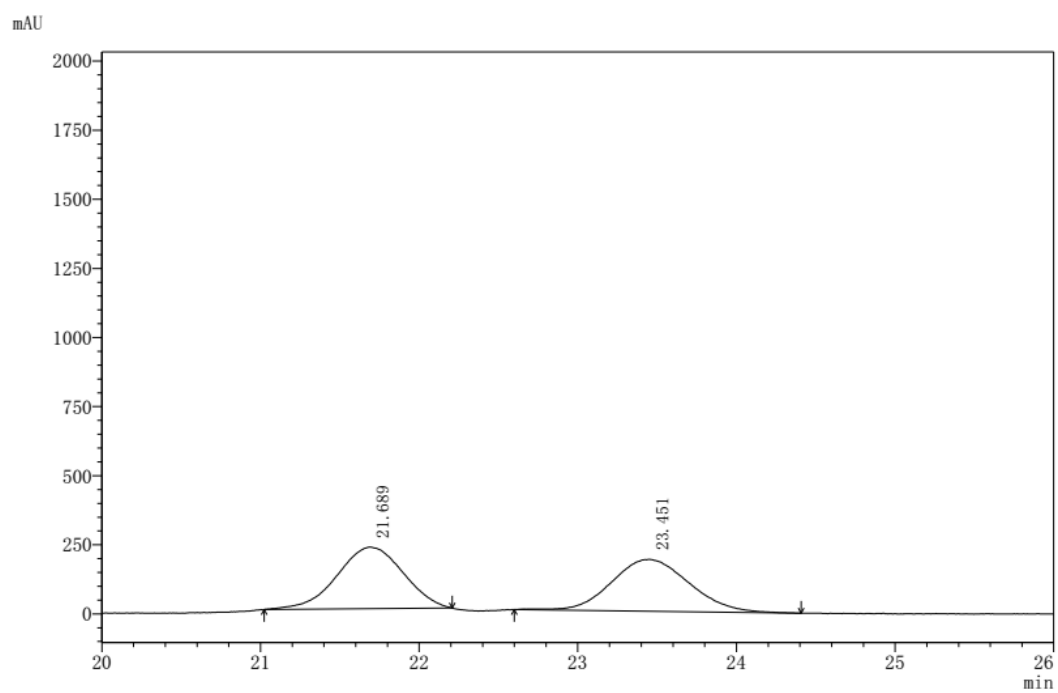

| Peak | RetTime | Area    | Height | Area%  |
|------|---------|---------|--------|--------|
| 1    | 21.689  | 6469757 | 222917 | 50.353 |
| 2    | 23.451  | 6378959 | 187898 | 49.647 |

HPLC spectra of *enantioenriched-3az*

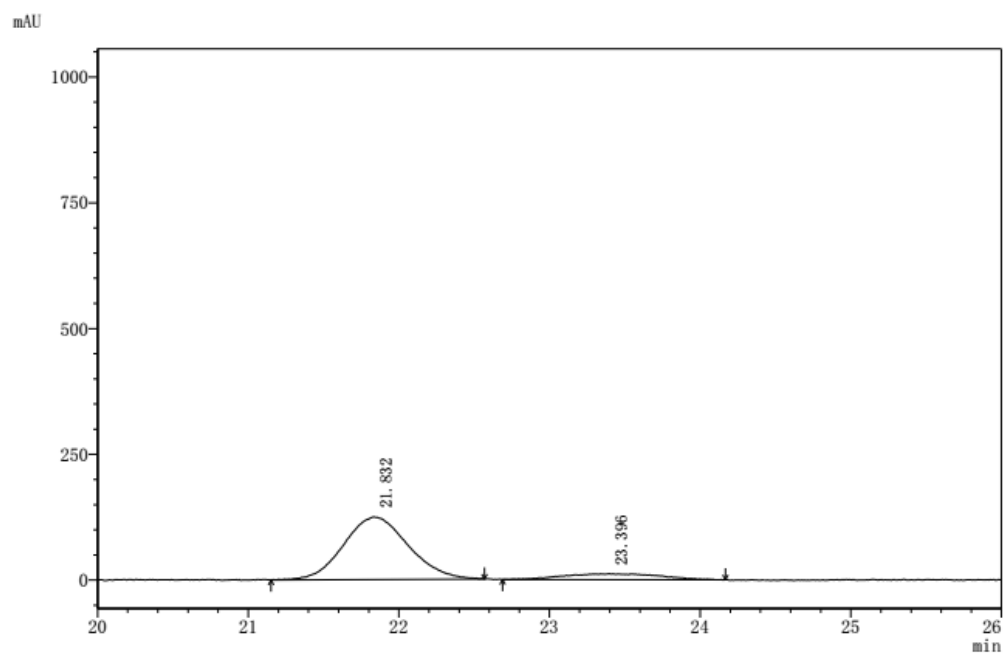

| Peak | RetTime | Area    | Height | Area%  |
|------|---------|---------|--------|--------|
| 1    | 21.832  | 3712395 | 124256 | 87.928 |
| 2    | 23.396  | 509706  | 11671  | 12.072 |

HPLC spectra of *racemic-4az*

mAU

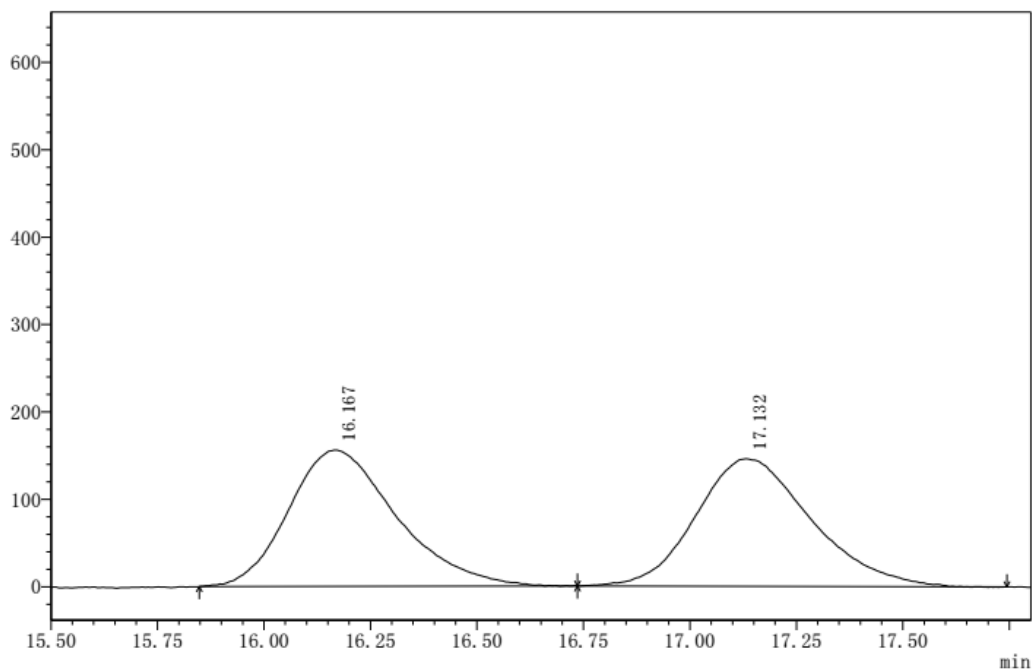

| Peak | RetTime | Area    | Height | Area%  |
|------|---------|---------|--------|--------|
| 1    | 16.167  | 2743812 | 155970 | 49.999 |
| 2    | 17.132  | 2743962 | 145783 | 50.001 |

HPLC spectra of *enantioenriched-4az*

mAU

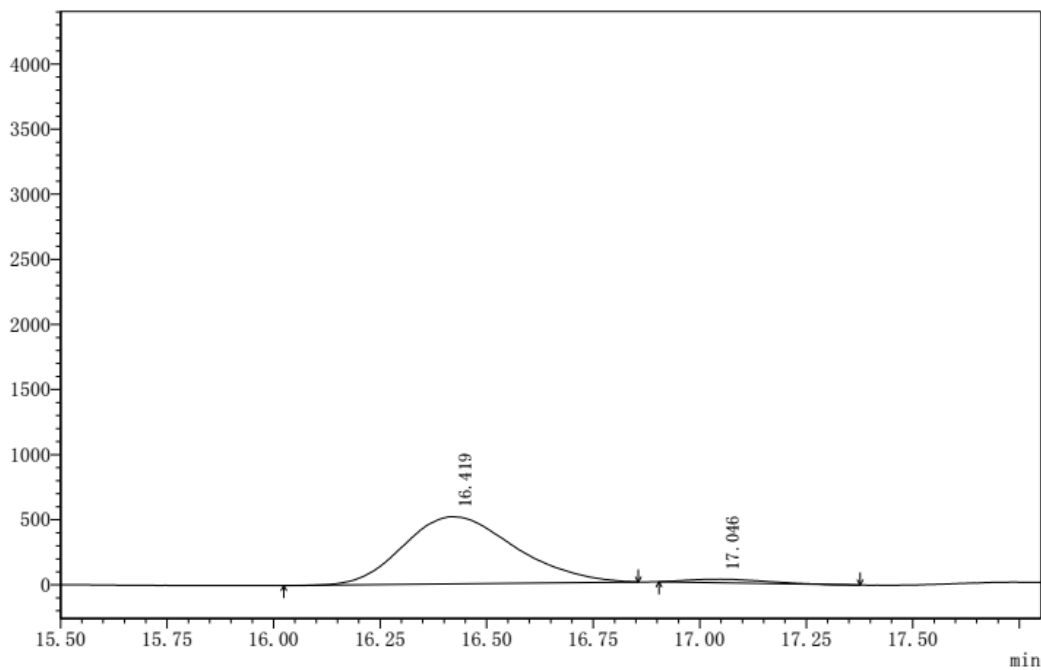

| Peak | RetTime | Area    | Height | Area%  |
|------|---------|---------|--------|--------|
| 1    | 16.419  | 9380498 | 515482 | 96.586 |
| 2    | 17.046  | 331590  | 26644  | 3.414  |

HPLC spectra of *racemic-3ba*

mAU

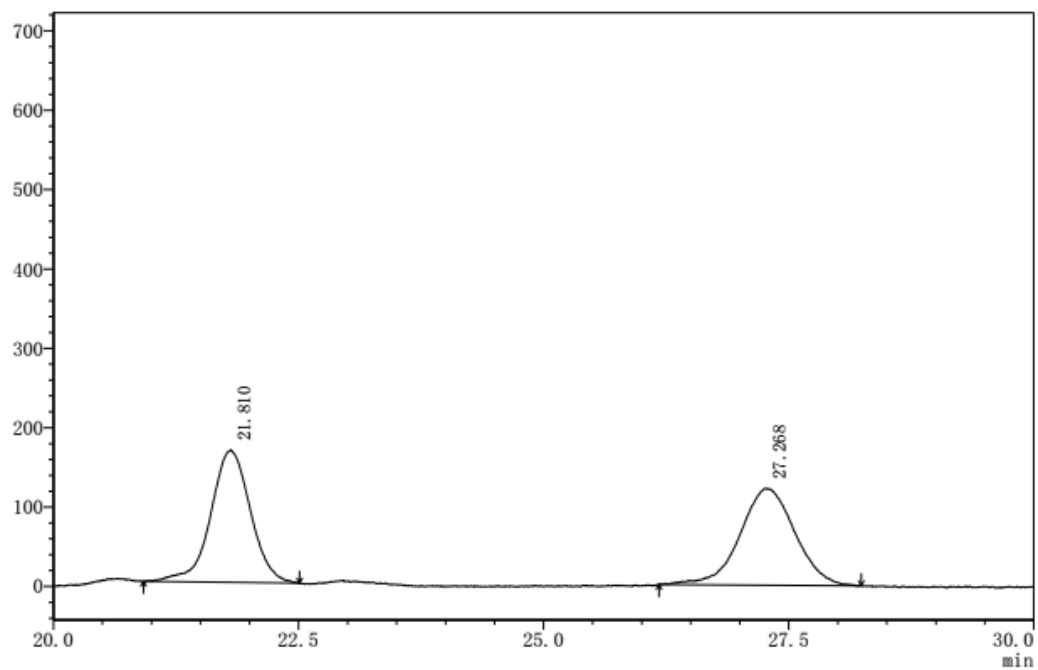

| Peak | RetTime | Area    | Height | Area%  |
|------|---------|---------|--------|--------|
| 1    | 21.810  | 4703883 | 166411 | 49.765 |
| 2    | 27.268  | 4748247 | 122015 | 50.235 |

HPLC spectra of *enantioenriched-3ba*

mAU

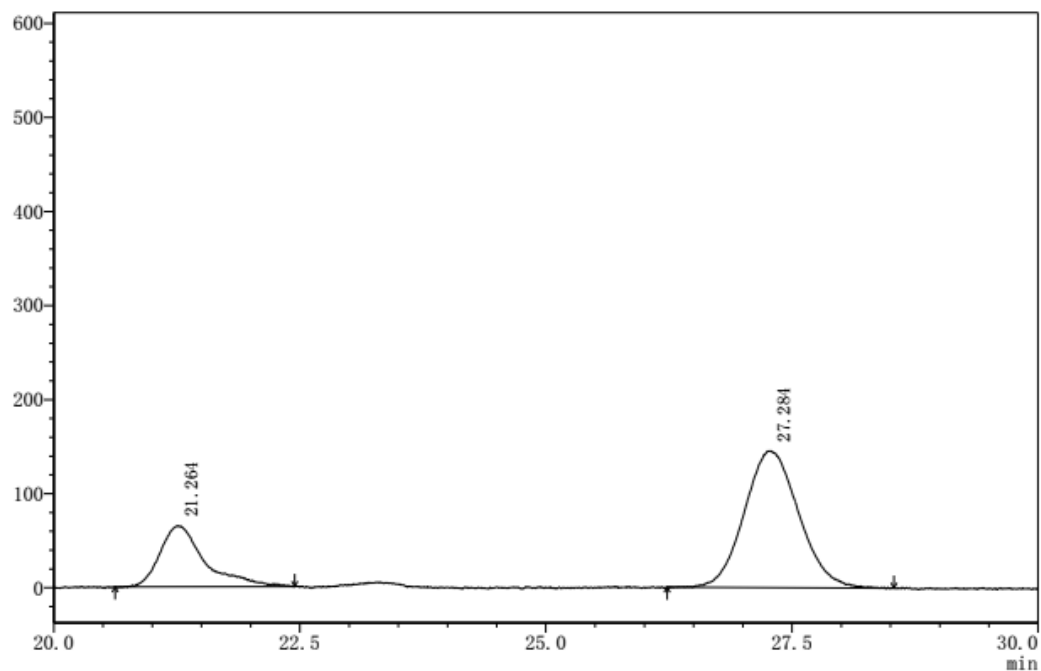

| Peak | RetTime | Area    | Height | Area%  |
|------|---------|---------|--------|--------|
| 1    | 21.264  | 2049231 | 64611  | 26.891 |
| 2    | 27.284  | 5571290 | 145185 | 73.109 |

HPLC spectra of *racemic-4ba*

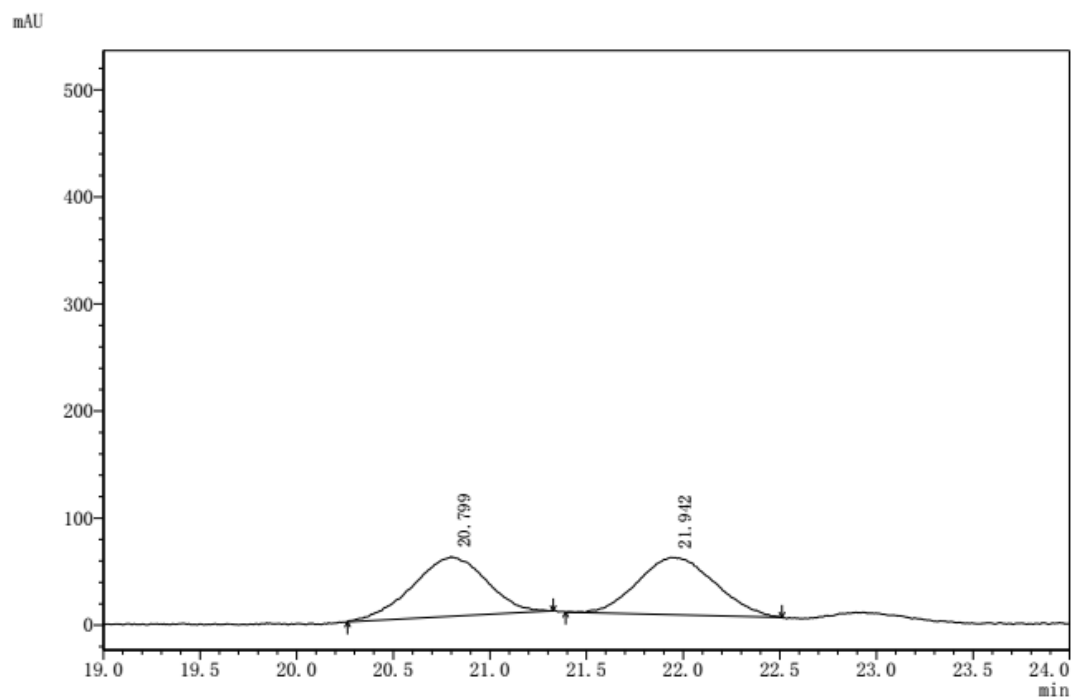

| Peak | RetTime | Area    | Height | Area%  |
|------|---------|---------|--------|--------|
| 1    | 20.799  | 1466520 | 55452  | 49.686 |
| 2    | 21.942  | 1485045 | 53374  | 50.314 |

HPLC spectra of *enantioenriched-4ba*

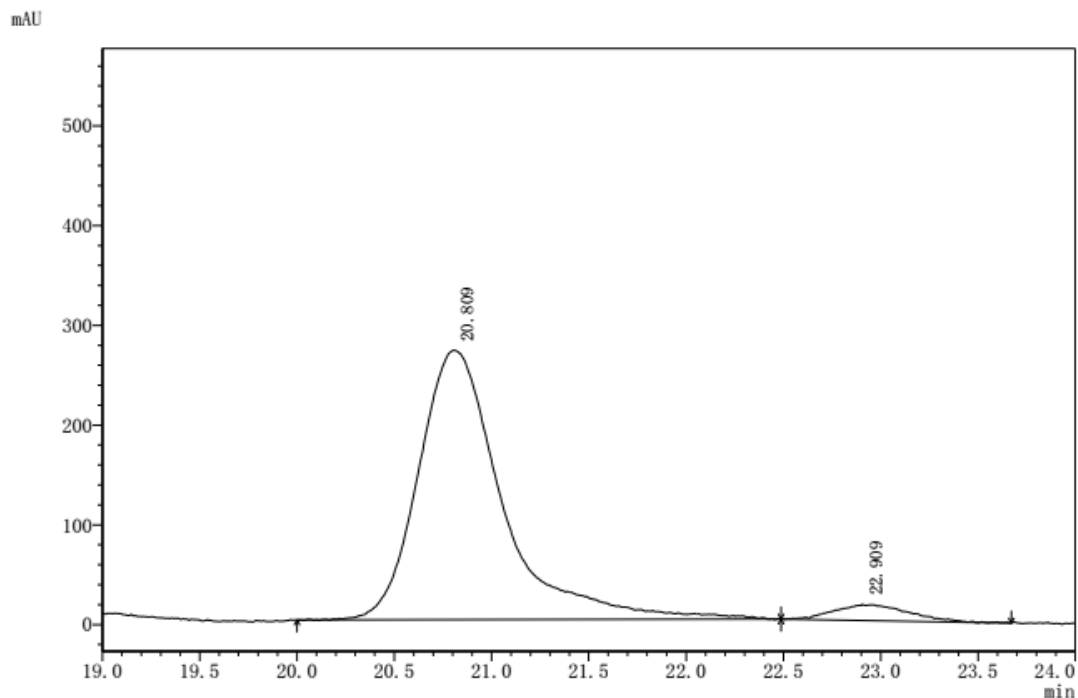

| Peak | RetTime | Area    | Height | Area%  |
|------|---------|---------|--------|--------|
| 1    | 20.809  | 8124410 | 269964 | 94.998 |
| 2    | 22.909  | 427763  | 15899  | 5.002  |

HPLC spectra of *racemic-3bb*

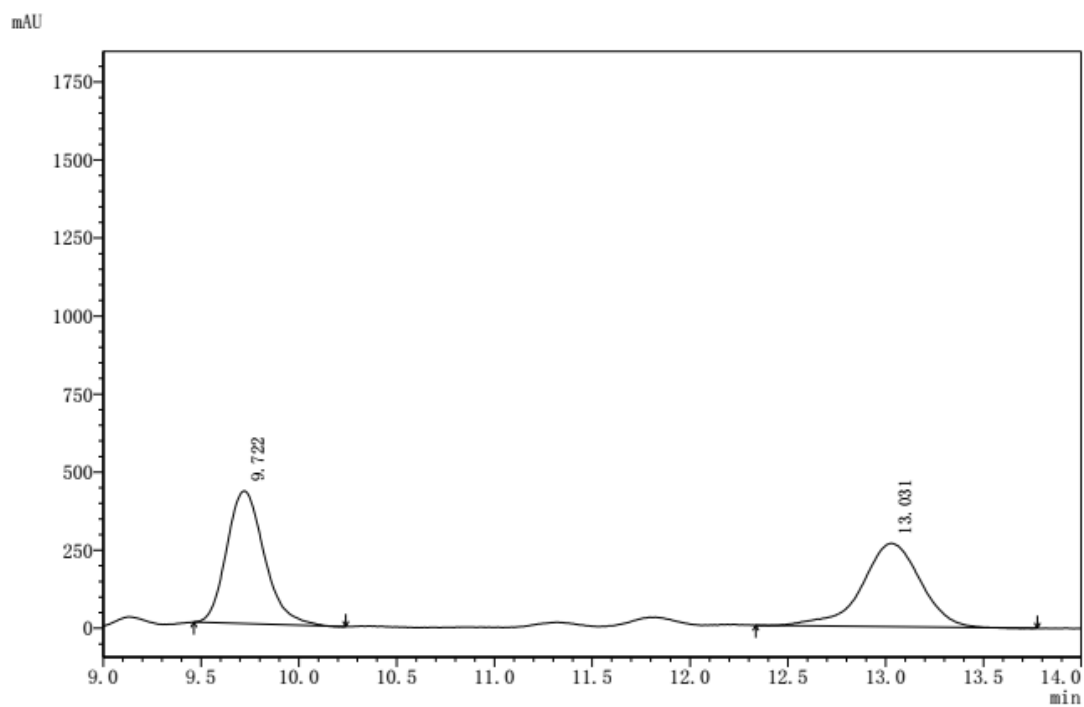

| Peak | RetTime | Area    | Height | Area%  |
|------|---------|---------|--------|--------|
| 1    | 9.722   | 5687214 | 424150 | 50.580 |
| 2    | 13.031  | 5556874 | 267043 | 49.420 |

HPLC spectra of *enantioenriched-3bb*

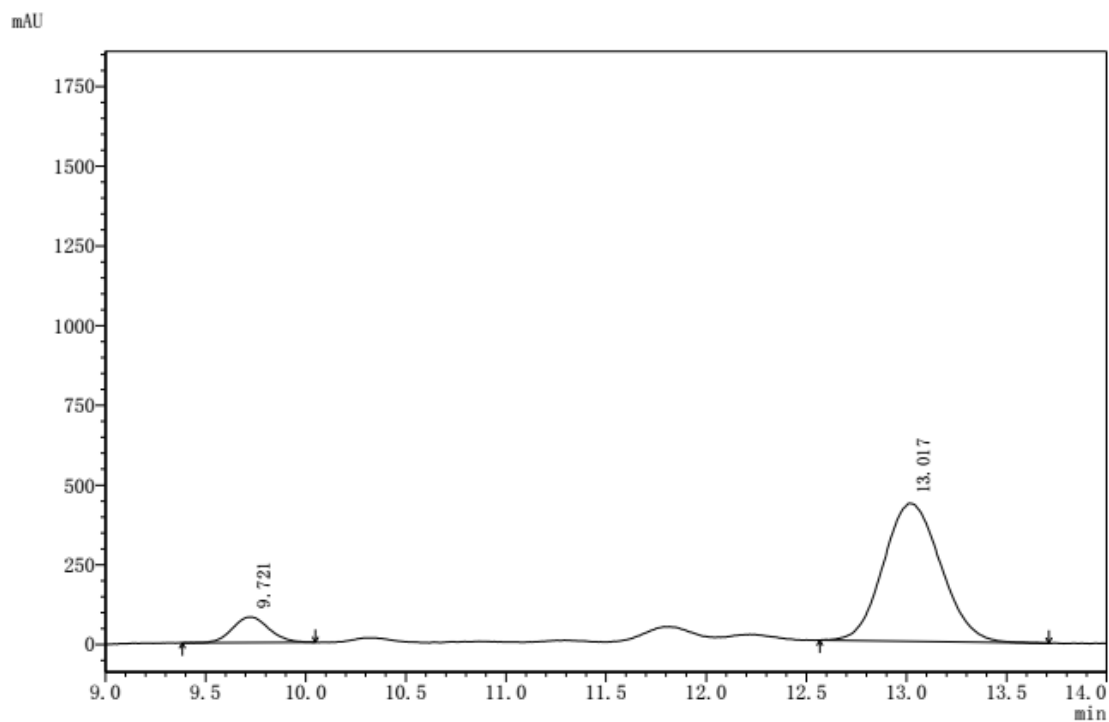

| Peak | RetTime | Area    | Height | Area%  |
|------|---------|---------|--------|--------|
| 1    | 9.721   | 980386  | 79087  | 10.276 |
| 2    | 13.017  | 8560128 | 431551 | 89.724 |

### HPLC spectra of *racemic-4bb*

mAU

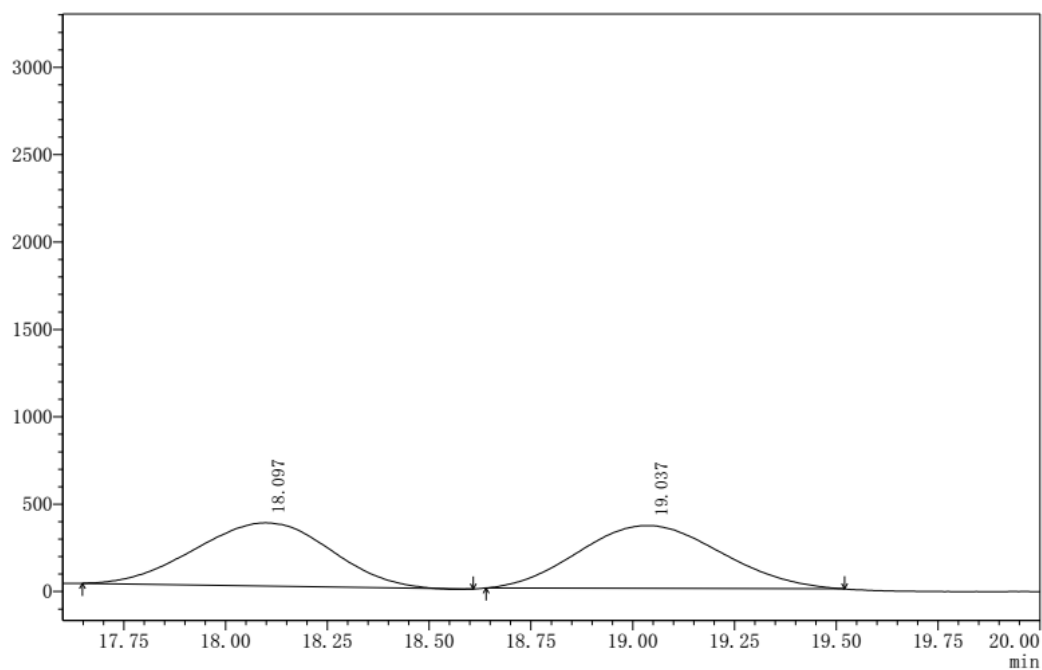

| Peak | RetTime | Area    | Height | Area%  |
|------|---------|---------|--------|--------|
| 1    | 18.097  | 8340296 | 360853 | 48.780 |
| 2    | 19.037  | 8757489 | 359140 | 51.220 |

### HPLC spectra of *enantioenriched-4bb*

mAU

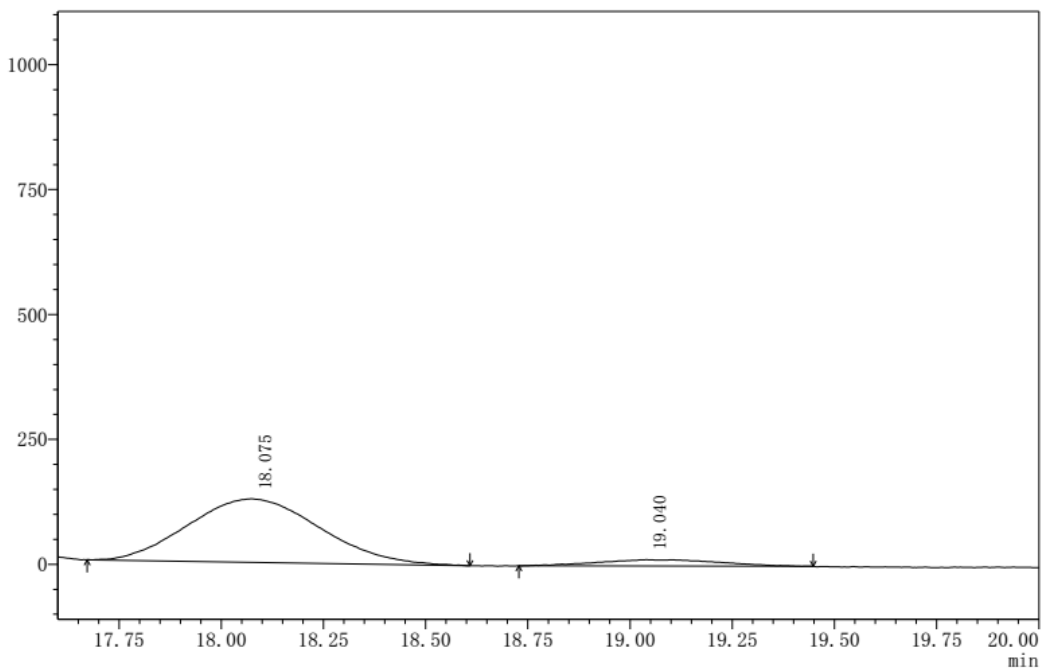

| Peak | RetTime | Area    | Height | Area%  |
|------|---------|---------|--------|--------|
| 1    | 18.075  | 2838085 | 127037 | 91.567 |
| 2    | 19.040  | 261384  | 12612  | 8.433  |

### HPLC spectra of *racemic-3bc*

mAU

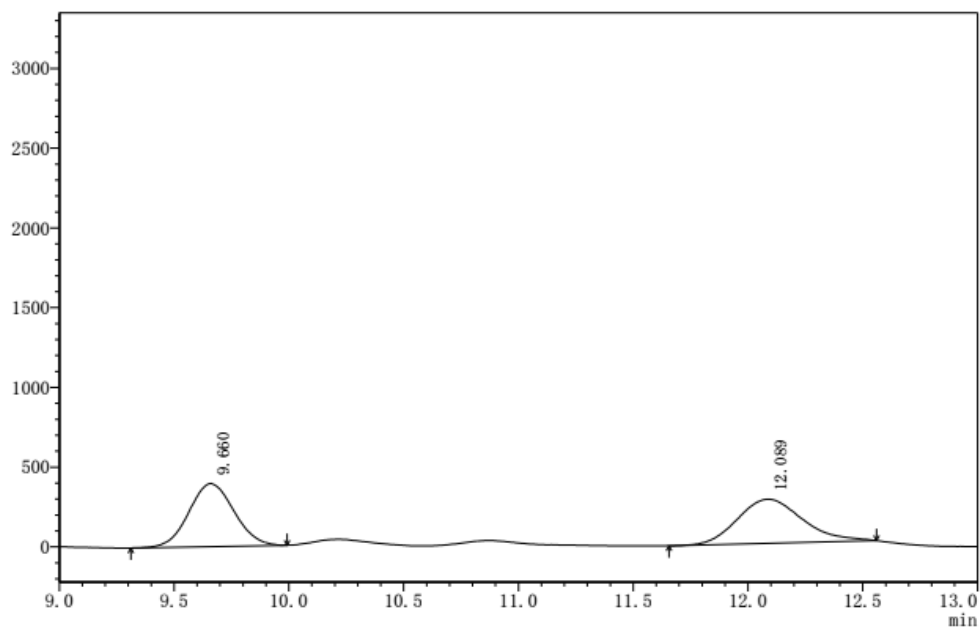

| Peak | RetTime | Area    | Height | Area%  |
|------|---------|---------|--------|--------|
| 1    | 9.660   | 5408293 | 395521 | 49.867 |
| 2    | 12.089  | 5437226 | 275760 | 50.133 |

### HPLC spectra of *enantioenriched-3bc*

mAU

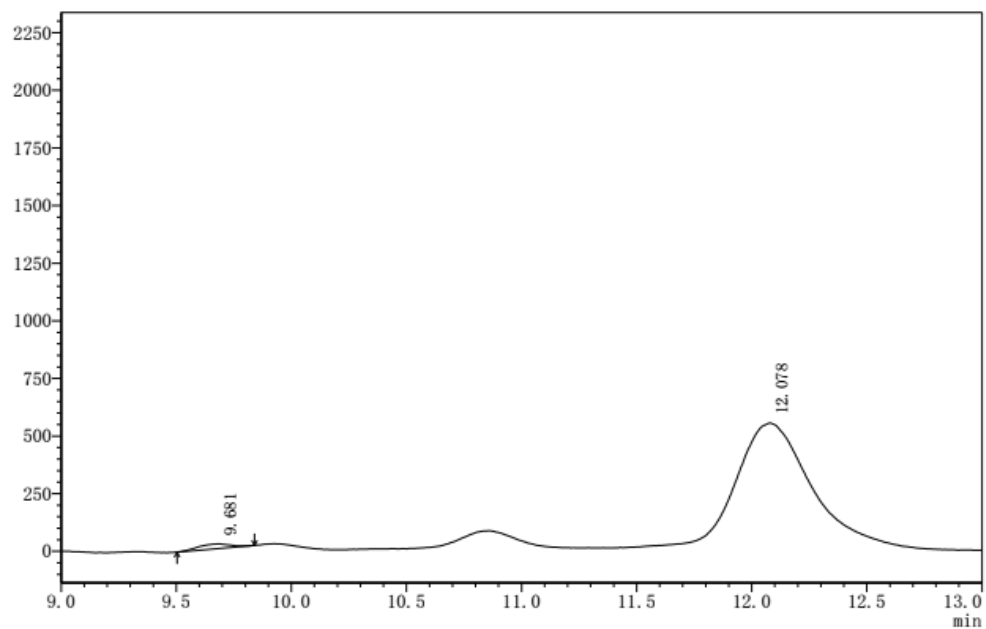

| Peak | RetTime | Area     | Height | Area%  |
|------|---------|----------|--------|--------|
| 1    | 9.681   | 206677   | 20456  | 1.624  |
| 2    | 12.078  | 12517870 | 543756 | 98.376 |

HPLC spectra of *racemic-4bc*

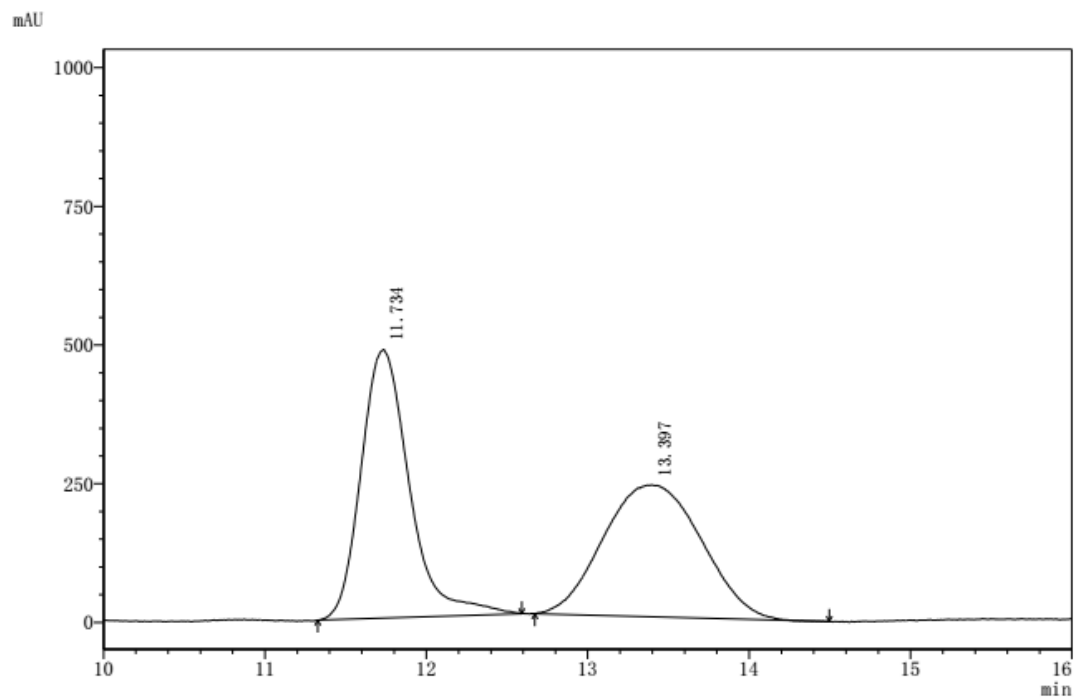

| Peak | RetTime | Area     | Height | Area%  |
|------|---------|----------|--------|--------|
| 1    | 11.734  | 10065872 | 483693 | 50.096 |
| 2    | 13.397  | 10027104 | 237645 | 49.904 |

HPLC spectra of *enantioenriched-4bc*

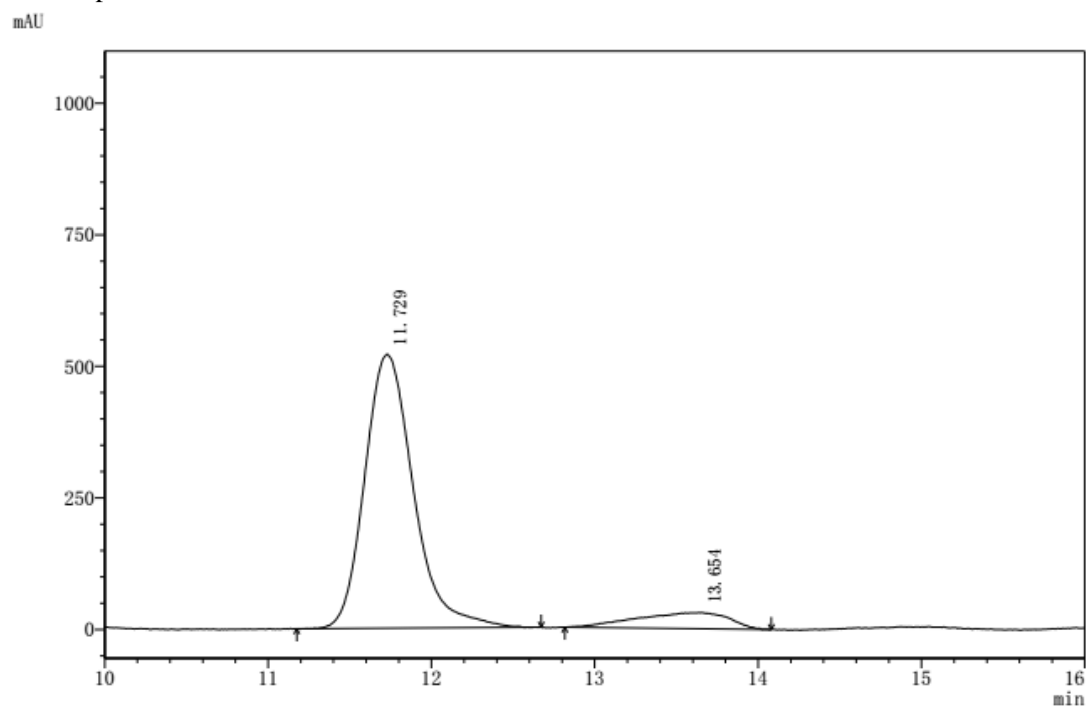

| Peak | RetTime | Area     | Height | Area%  |
|------|---------|----------|--------|--------|
| 1    | 11.729  | 10790537 | 520050 | 90.036 |
| 2    | 13.654  | 1194206  | 30827  | 9.964  |



HPLC spectra of *racemic-3bd*

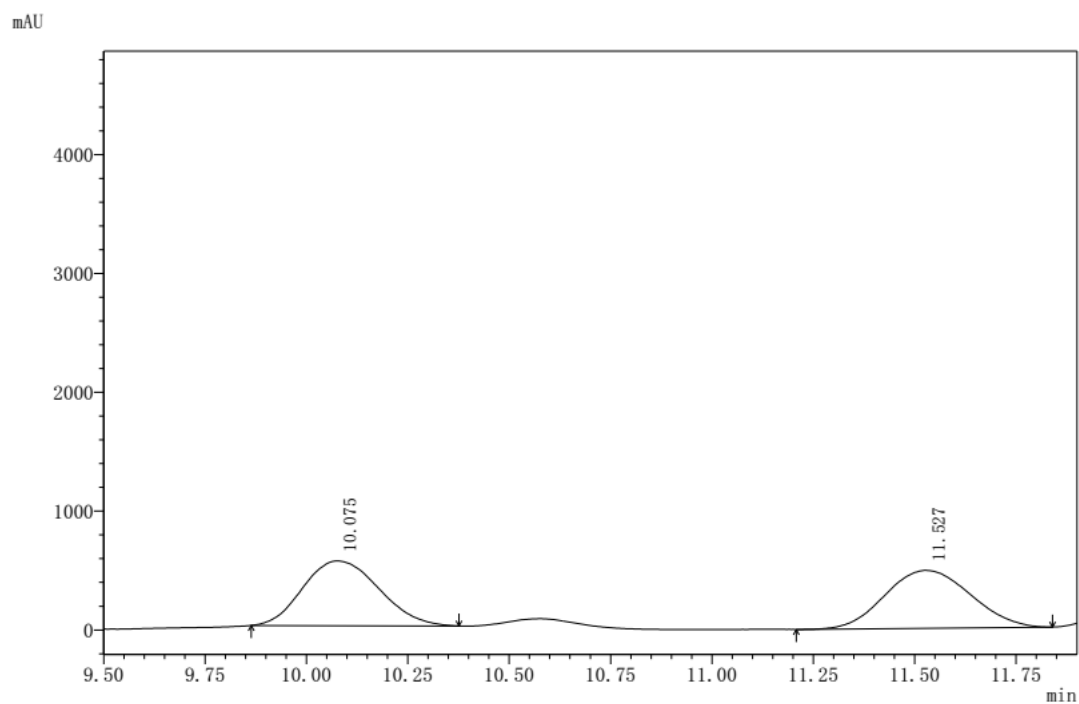

| Peak | RetTime | Area    | Height | Area%  |
|------|---------|---------|--------|--------|
| 1    | 10.075  | 7117117 | 543869 | 49.923 |
| 2    | 11.527  | 7139037 | 487223 | 50.077 |

HPLC spectra of *enantioenriched-3bd*

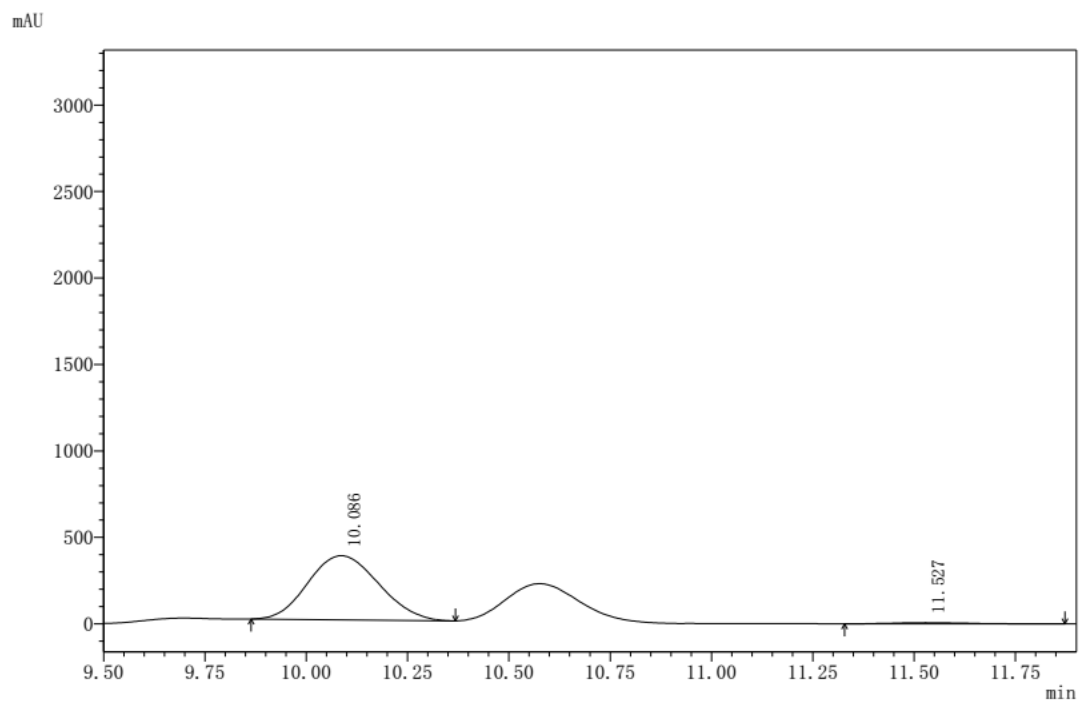

| Peak | RetTime | Area    | Height | Area%  |
|------|---------|---------|--------|--------|
| 1    | 10.086  | 4503082 | 371661 | 98.179 |
| 2    | 11.527  | 83533   | 6795   | 1.821  |

HPLC spectra of *racemic-5*

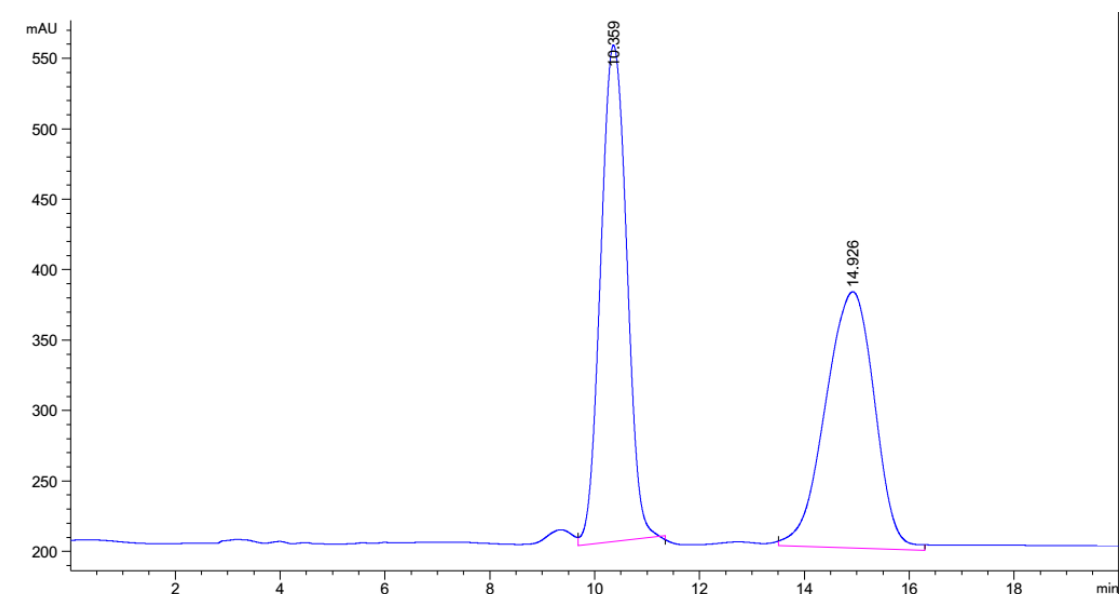

| Peak | RetTime | Area      | Height    | Area%   |
|------|---------|-----------|-----------|---------|
| 1    | 10.359  | 1.22011e4 | 352.34674 | 50.8352 |
| 2    | 14.926  | 1.18001e4 | 181.88972 | 49.1648 |

HPLC spectra of **enantioenriched-5**

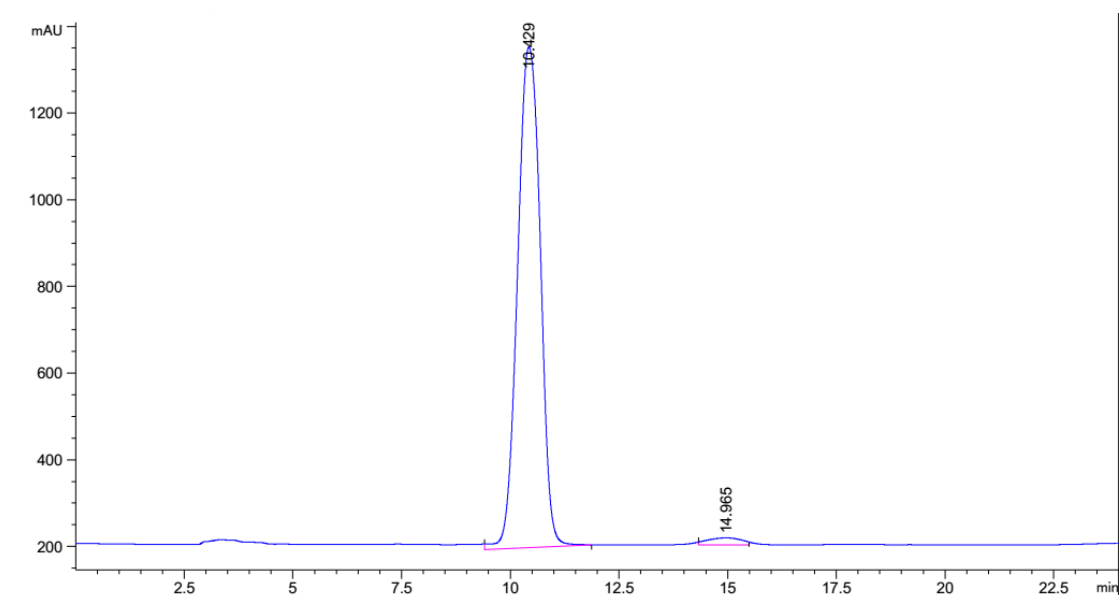

| Peak | RetTime | Area      | Height     | Area%   |
|------|---------|-----------|------------|---------|
| 1    | 10.429  | 4.21804e4 | 1155.45996 | 97.9998 |
| 2    | 14.965  | 860.92230 | 15.88589   | 2.0002  |

## 5. X-Ray Crystal Structures

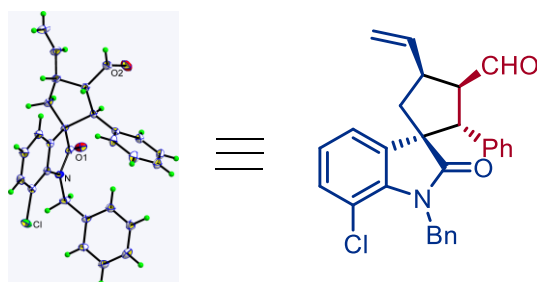

**Figure S3** X-ray structure of **3an**

*Displacement ORTEP plots are drawn at the 20% probability level. (Solvent: dichloromethane/n-hexane)*

|                                            |                    |                                                                   |
|--------------------------------------------|--------------------|-------------------------------------------------------------------|
| <b>Compound 3an</b>                        |                    | <b>CCDC: 2007712</b>                                              |
| Bond precision: C-C = 0.0034 Å             |                    | Wavelength = 0.71076                                              |
| a = 9.5170(5)                              | b = 16.0000(8)     | a = 9.5170(5)                                                     |
| alpha = 90                                 | beta = 97.6142(16) | alpha = 90                                                        |
| Cell setting: monoclinic                   |                    | Moiety formula: C <sub>28</sub> H <sub>24</sub> ClNO <sub>2</sub> |
| Cell volume = 2233.6(2)                    |                    | Space group: P21/n                                                |
| Data completeness = 0.998                  |                    | Theta(max) = 27.550                                               |
| R(reflections) = 0.0575( 2867)             |                    | WR2(reflections) = 0.1557( 5149)                                  |
| S = 1.081                                  |                    | Radiation type: MoK $\alpha$                                      |
| Measurement device type: CCD area detector |                    | Measurement method: phi and omega scans                           |
| Structure solution: SHELXS-97              |                    | Structure refinement: SHELXL-97                                   |
| Solution primary: direct                   |                    | Solution secondary: difmap                                        |
| Solution hydrogens: geom                   |                    | Hydrogen treatment: mixed                                         |

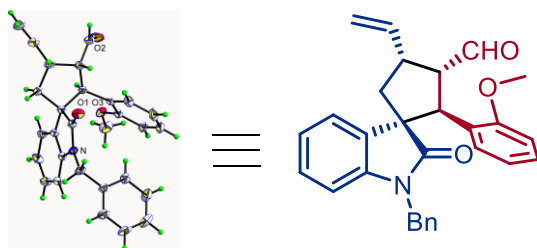

**Figure S4** X-ray structure of **4az**

Displacement ORTEP plots are drawn at the 20% probability level. (Solvent: dichloromethane/n-hexane)

|                                            |                      |                                                                 |
|--------------------------------------------|----------------------|-----------------------------------------------------------------|
| <b>Compound 4az</b>                        | <b>CCDC: 2007726</b> | Flack Parameter = -0.2                                          |
| Bond precision: C-C = 0.0037 Å             |                      | Wavelength = 1.54178                                            |
| a = 8.6247(4)                              | b = 14.0350(6)       | c = 19.2606(9)                                                  |
| alpha = 90                                 | beta = 90            | gamma = 90                                                      |
| Cell setting: Orthorhombic                 |                      | Moiety formula: C <sub>29</sub> H <sub>27</sub> NO <sub>3</sub> |
| Cell volume = 2331.45(18)                  |                      | Space group: P2(1)2(1)2(1)                                      |
| Data completeness = 0.98                   |                      | Theta(max) = 66.580                                             |
| R(reflections) = 0.0461( 3530)             |                      | WR2(reflections) = 0.1285( 4052)                                |
| S = 1.025                                  |                      | Radiation type: CuK $\alpha$                                    |
| Measurement device type: CCD area detector |                      | Measurement method: phi and omega scans                         |
| Structure solution: SHELXS-97              |                      | Structure refinement: SHELXL-97                                 |
| Solution primary: direct                   |                      | Solution secondary: difmap                                      |
| Solution hydrogens: geom                   |                      | Hydrogen treatment: mixed                                       |

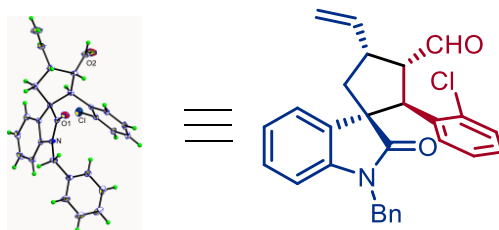

**Figure S5** X-ray structure of **4ay**

Displacement ORTEP plots are drawn at the 20% probability level. (Solvent: dichloromethane/n-hexane)

|                                            |                      |                                                                   |
|--------------------------------------------|----------------------|-------------------------------------------------------------------|
| <b>Compound 4ay</b>                        | <b>CCDC:</b> 2003071 | Flack Parameter = -0.02                                           |
| Bond precision: C-C = 0.0037 Å             |                      | Wavelength = 0.71076                                              |
| a = 8.3579(8)                              | b = 13.8057(13)      | c = 19.3031(19)                                                   |
| alpha = 90                                 | beta = 90            | gamma = 90                                                        |
| Cell setting: Orthorhombic                 |                      | Moiety formula: C <sub>28</sub> H <sub>24</sub> ClNO <sub>2</sub> |
| Cell volume = 2227.3(4)                    |                      | Space group: P212121                                              |
| Data completeness = 1.00                   |                      | Theta(max) = 27.490                                               |
| R(reflections) = 0.0503( 3561)             |                      | WR2(reflections) = 0.1124( 5093)                                  |
| S = 1.021                                  |                      | Radiation type: MoK $\alpha$                                      |
| Measurement device type: CCD area detector |                      | Measurement method: phi and omega scans                           |
| Structure solution: SHELXS-97              |                      | Structure refinement: SHELXL-97                                   |
| Solution primary: direct                   |                      | Solution secondary: difmap                                        |
| Solution hydrogens: geom                   |                      | Hydrogen treatment: mixed                                         |
